# Supplementary material for: Integration of locomotion and auditory signals in the mouse inferior colliculus
Source: eLife. 2020 Jan 28;9:e52228. doi: 10.7554/eLife.52228 (PMC7004561; doi:10.7554/eLife.52228)
Supplement: Figure 1—source data 1. [file elife-52228-fig1-data1.xlsx]

## Sheet: Sheet1
Figure 1C							Figure 1D					Figure supplement 1A			Figure supplement 1C					Figure supplement 1D			Figure supplement 1E				Figure supplement 1F			Figure supplement 1G
Increased		decreased		no change								Normalized PSD			Recorded playback relative to recorded walking						playback (30dB)	playback (40dB)		playback (30dB)	playback (40dB)		Δr (Hz)			Δr (Hz)
stationary(Hz)	walking(Hz)	stationary(Hz)	walking(Hz)	stationary(Hz)	walking(Hz)		x	N(increased)	N(decreased)	N(no change)		freq (kHz)	baseline	walking	Whole (dB)	Events (dB)				time(sec)	Firing rate (Hz)	Firing rate (Hz)	time(sec)	Firing rate (Hz)	Firing rate (Hz)		Playback 30dB	Walkinng		Playback 40dB	Walkinng
2.2829	29.679	22.045	12.98	25.703	25.992		-1	0	0	0		0	-48.7187	-46.3773	-1.2619	-3.2545				-0.9995	0	0	-0.9995	74.7744	11.011		-1.1386	24.4474		7.5	24.4474
62.351	75.186	6.0941	0.52473	38.014	34.9		-0.9	0	0	0		0.195312	-45.281	-43.8147	1.0039	1.0231				-0.9985	0	0	-0.9985	83.7004	16.0826		1.5408	6.5021		4.6351	6.5021
32.083	44.534	10.824	4.5792	8.8151	9.4409		-0.8	0	0	0		0.390625	-44.0333	-42.8244	4.7707	5.7448				-0.9975	0	0	-0.9975	75.7483	18.543		1.8947	2.8846		8.8958	2.8846
32.191	48.191	73.402	64.388	8.0615	7.1132		-0.7	0	0	0		0.585938	-38.6336	-37.9927	9.2077	10.7249				-0.9965	0	0	-0.9965	56.8944	17.6364		-7.7917	0.071		-9.475	0.071
4.4297	23.309	2.9348	1.4887	61.454	62.784		-0.6	0	0	0		0.78125	-31.4079	-30.8339						-0.9955	0	0	-0.9955	39.0515	16.1087		-4.2647	-7.2818		-10.2	-7.2818
4.3716	8.4375	66.904	58.416	41.663	43.665		-0.5	0	0	0		0.976562	-26.7126	-25.8055						-0.9945	0	0	-0.9945	30.8647	18.4586		2.0588	-6.5779		0.8	11.3685
37.742	41.301	55.575	32.907	16.79	13.795		-0.4	0	1	0		1.17188	-23.7673	-23.1505						-0.9935	0	0	-0.9935	32.9708	26.9122		2	11.3685		-7.15	-10.1013
6.7294	13.966	68.729	64.922	0.08413	0		-0.3	0	1	0		1.36719	-22.5076	-21.9799						-0.9925	0	0	-0.9925	40.3674	38.7302		10.8529	4.9163		5.75	8.9639
25.635	58.129	9.2368	2.5963	1.436	1.7669		-0.2	0	8	0		1.5625	-21.3799	-21.0695						-0.9915	0	0	-0.9915	47.639	47.6699		-0.3571	-10.1013		13.75	7.8864
79.47	86.758	67.804	64.652	1.0231	0.3		-0.1	0	6	4		1.75781	-20.3782	-20.1198						-0.9905	0	0	-0.9905	52.1129	48.8523		2.1852	8.9639		-1.0294	-0.7408
20.075	61.058	8.9639	5.126	76.327	76.539		0	3	6	12		1.95312	-20.0434	-19.5197						-0.9895	0	0	-0.9895	53.5176	42.6317		6.5741	7.8864		11	14.117
0.99247	11.812	8.992	6.3263	19.672	21.168		0.1	13	0	6		2.14844	-19.4113	-18.6335						-0.9885	0	0	-0.9885	52.0495	33.8665		0.375	-0.7408		4.025	5.7159
30.31	42.862	19.112	8.1831	19.834	20.874		0.2	14	0	1		2.34375	-18.8902	-18.3612						-0.9875	0	0	-0.9875	47.2959	27.7089		6.3333	14.117		3.9722	-20.0956
3.1675	10.303	3.9589	1.6122	6.4889	5.1844		0.3	5	0	0		2.53906	-18.6101	-18.1728						-0.9865	0	0	-0.9865	38.9086	25.9779		1.8438	5.7159		-1.725	-1.9382
5.4139	38.698	27.644	15.884	9.032	3.5499		0.4	6	0	0		2.73438	-18.1292	-17.5265						-0.9855	0	0	-0.9855	28.0721	27.0799		-0.8056	-20.0956		0.35	6.1411
19.252	26.889	13.371	1.9811	23.19	25.256		0.5	6	0	0		2.92969	-17.6899	-17.1376						-0.9845	0	0	-0.9845	17.9163	28.675		2.75	-1.9382		0.7941	0.2824
27.666	59.424	20.765	13.483	6.0272	8.9118		0.6	3	0	0		3.125	-17.136	-16.1027						-0.9835	0	0	-0.9835	12.1912	29.6699		1.825	6.1411		31.5	4.1229
4.4326	49.534	33.437	26.859	42.645	42.716		0.7	1	0	0		3.32031	-16.7606	-15.279						-0.9825	0	0	-0.9825	13.4632	29.9543		0.6154	0.2824		8.6071	-0.7687
2.052	3.2175	80.168	70.067	11.669	10.928		0.8	0	0	0		3.51562	-16.7409	-14.7737						-0.9815	0	0	-0.9815	21.7653	29.502		21.325	4.1229		7.3846	26.2979
0.28761	2.637	76.352	56.256	20.718	18.78		0.9	0	0	0		3.71094	-16.5506	-14.3712						-0.9805	0	0	-0.9805	33.7972	28.0125		6.7273	-0.7687		11.8333	-0.1316
7.6305	21.565	2.3151	1.5465	1.2842	1.5666		1	0	0	0		3.90625	-16.0811	-13.8688						-0.9795	0	0	-0.9795	43.9806	25.0989		3.8	26.2979
5.1868	33.202	36.956	26.705	2.3908	2.2592							4.10156	-15.9518	-13.4223						-0.9785	0	0	-0.9785	48.8007	21.3724		8.1111	-10.2512
23.208	35.185			16.825	18.714							4.29688	-15.1262	-12.0291						-0.9775	0	0	-0.9775	50.8857	19.4076		6.4	11.2299
8.8064	12.789											4.49219	-15.296	-11.1518						-0.9765	0	0	-0.9765	56.6679	22.64		0.175	-0.1316
4.9594	8.8947											4.6875	-15.0895	-10.3952						-0.9755	0	0	-0.9755	68.7563	32.8633		4.85	5.9155
24.755	39.094											4.88281	-14.7915	-9.6265						-0.9745	0	0	-0.9745	82.2517	49.0939
14.743	36.768											5.07812	-14.633	-8.91459						-0.9735	0	0	-0.9735	89.389	68.3333
3.1555	21.304											5.27344	-14.3573	-7.4222						-0.9725	0	0	-0.9725	85.8594	86.2363
42.061	48.21											5.46875	-14.009	-5.86077						-0.9715	0	0	-0.9715	72.2178	97.1557
8.5006	29.806											5.66406	-13.664	-5.17939						-0.9705	0	0	-0.9705	52.3286	95.8952
10.856	22.572											5.85938	-13.7032	-4.70327						-0.9695	0	0	-0.9695	31.8966	82.1675
28.012	44.521											6.05469	-13.5763	-3.08656						-0.9685	0	0	-0.9685	16.208	63.2478
56.443	67.336											6.25	-13.5413	-2.13981						-0.9675	0	0	-0.9675	7.85702	49.6341
12.916	41.999											6.44531	-13.1381	-1.69994						-0.9665	0	0	-0.9665	7.20437	46.5543
49.248	73.696											6.64062	-12.7114	-0.820594						-0.9655	0	0	-0.9655	14.6683	50.0996
55.271	61.773											6.83594	-12.4943	0						-0.9645	0	0	-0.9645	30.9307	51.7553
1.3628	12.731											7.03125	-12.4474	-0.371881						-0.9635	0	0	-0.9635	53.6561	46.2595
48.326	53.242											7.22656	-12.2279	-0.93299						-0.9625	0	0	-0.9625	74.7334	35.4411
10.954	19.918											7.42188	-11.8078	-0.564124						-0.9615	0	0	-0.9615	83.4952	25.4351
1.8349	9.7213											7.61719	-11.6602	-0.867445						-0.9605	0	0	-0.9605	74.9722	20.9338
4.0367	9.1475											7.8125	-11.4816	-0.960993						-0.9595	0	0	-0.9595	54.615	21.9098
7.5965	21.714											8.00781	-11.5263	-0.951826						-0.9585	0	0	-0.9585	33.8407	25.0592
1.3966	7.1125											8.20312	-11.2714	-2.04014						-0.9575	0	0	-0.9575	21.4125	27.2493
0.025316	0.4375											8.39844	-11.0684	-2.78051						-0.9565	0	0	-0.9565	18.8827	27.0479
7.6143	10.52											8.59375	-10.3355	-2.89404						-0.9555	0	0	-0.9555	22.0481	24.0335
11.541	17.682											8.78906	-10.824	-2.31892						-0.9545	0	0	-0.9545	25.514	18.4971
20.168	24.291											8.98438	-11.1006	-3.08269						-0.9535	0	0	-0.9535	26.8184	12.0032
21.885	48.183											9.17969	-11.0405	-4.01468						-0.9525	0.00393625	0	-0.9525	26.8935	6.92514
19.688	38.091											9.375	-11.1406	-4.61483						-0.9515	0.0256676	0	-0.9515	26.7551	5.14948
5.8945	17.124											9.57031	-10.8493	-4.70066						-0.9505	0.130351	0	-0.9505	25.1634	7.48686
6.5578	12.473											9.76562	-10.9305	-4.49534						-0.9495	0.515547	0	-0.9495	20.5333	13.6545
												9.96094	-11.1839	-4.2114						-0.9485	1.588	0	-0.9485	13.6893	21.9302
												10.1562	-10.9755	-4.05638						-0.9475	3.80941	0	-0.9475	7.24403	29.139
												10.3516	-11.2019	-4.52542						-0.9465	7.11691	0	-0.9465	3.00699	32.0065
												10.5469	-11.2975	-5.09952						-0.9455	10.355	0	-0.9455	0.973812	29.139
												10.7422	-11.0954	-5.96347						-0.9445	11.7338	0	-0.9445	0.246218	21.9302
												10.9375	-11.3134	-6.50617						-0.9435	10.355	0	-0.9435	0.0484832	13.6545
												11.1328	-11.2151	-6.68154						-0.9425	7.11691	0	-0.9425	0.00743514	7.48078
												11.3281	-11.22	-6.3895						-0.9415	3.80941	0	-0.9415	0	5.10981
												11.5234	-11.2794	-6.61764						-0.9405	1.588	0	-0.9405	0	6.72369
												11.7188	-11.3476	-7.54988						-0.9395	0.515547	0	-0.9395	0.00743514	11.2125
												11.9141	-11.2112	-7.8551						-0.9385	0.130351	0	-0.9385	0.0484832	16.0887
												12.1094	-11.3004	-8.14075						-0.9375	0.0256676	0	-0.9375	0.246218	18.3873
												12.3047	-11.578	-8.57252						-0.9365	0.00393625	0	-0.9365	0.981247	17.0411
												12.5	-11.661	-9.3143						-0.9355	0	0	-0.9355	3.05547	14.4512
												12.6953	-10.9743	-8.94023						-0.9345	0	0	-0.9345	7.49025	15.0255
												12.8906	-9.75121	-7.92655						-0.9335	0	0	-0.9335	14.6631	21.7945
												13.0859	-10.8884	-8.83078						-0.9325	0	0	-0.9325	23.5403	33.6861
												13.2812	-11.2727	-9.28672						-0.9315	0	0	-0.9315	32.4074	45.3376
												13.4766	-11.03	-8.87838						-0.9305	0	0	-0.9305	40.4443	50.1802
												13.6719	-11.0617	-9.395						-0.9295	0	0	-0.9295	47.4194	45.1423
												13.8672	-11.2354	-9.46498						-0.9285	0	0	-0.9285	51.9185	32.8894
												14.0625	-11.2315	-9.57664						-0.9275	0	0	-0.9275	51.9185	19.3403
												14.2578	-11.4249	-9.30491						-0.9265	0	0	-0.9265	47.4269	9.1382
												14.4531	-11.0947	-9.0343						-0.9255	0	0	-0.9255	40.5003	3.45847
												14.6484	-10.777	-8.72967						-0.9245	0	0	-0.9245	32.7021	1.07754
												14.8438	-10.7589	-8.78782						-0.9235	0	0	-0.9235	24.7678	0.448654
												15.0391	-10.8688	-8.7673						-0.9225	0	0	-0.9225	18.6849	0.842506
												15.2344	-10.8691	-8.7381						-0.9215	0	0	-0.9215	17.9464	2.46026
												15.4297	-10.9296	-8.66455						-0.9205	0	0	-0.9205	24.7649	5.89335
												15.625	-11.0055	-8.80494						-0.9195	0	0	-0.9195	37.4758	11.0385
												15.8203	-10.9326	-8.71587						-0.9185	0.00393625	0	-0.9185	51.1128	16.2047
												16.0156	-10.9933	-8.4893						-0.9175	0.0256676	0	-0.9175	61.214	18.9308
												16.2109	-11.0698	-8.56092						-0.9165	0.130351	0	-0.9165	66.9681	18.4574
												16.4062	-11.3426	-8.42171						-0.9155	0.515547	0	-0.9155	69.737	16.8861
												16.6016	-11.0895	-8.36421						-0.9145	1.588	0	-0.9145	69.1273	16.8861
												16.7969	-10.876	-7.97784						-0.9135	3.80941	0.00334581	-0.9135	62.7664	18.4574
												16.9922	-10.3639	-8.37438						-0.9125	7.11691	0.0218175	-0.9125	50.7804	18.9308
												17.1875	-10.6307	-8.60731						-0.9115	10.355	0.114144	-0.9115	38.3572	16.2047
												17.3828	-10.9483	-8.69929						-0.9105	11.7377	0.460033	-0.9105	31.9119	11.0446
												17.5781	-10.8547	-8.64496						-0.9095	10.3807	1.4606	-0.9095	33.2541	5.9391
												17.7734	-10.9946	-8.70431						-0.9085	7.24726	3.67956	-0.9085	38.5768	2.6953
												17.9688	-10.9797	-8.68731						-0.9075	4.32496	7.42099	-0.9075	42.6185	1.80104
												18.1641	-10.7723	-8.76548						-0.9065	3.176	12.1539	-0.9065	42.9069	3.49205
												18.3594	-11.0111	-8.86698						-0.9055	4.32496	16.4831	-0.9055	40.2615	8.58865
												18.5547	-11.0199	-8.83926						-0.9045	7.24726	19.0675	-0.9045	36.2484	17.7286
												18.75	-10.9712	-9.12441						-0.9035	10.3807	19.7211	-0.9035	31.307	29.6577
												18.9453	-11.1451	-9.42811						-0.9025	11.7377	19.5531	-0.9025	25.8048	40.8213
												19.1406	-11.2102	-9.60075						-0.9015	10.355	19.899	-0.9015	21.6609	47.5904
												19.3359	-11.2262	-9.48311						-0.9005	7.11691	21.1633	-0.9005	20.8997	48.8926
												19.5312	-11.3872	-9.9703						-0.8995	3.80941	22.7622	-0.8995	22.6635	46.0251
												19.7266	-11.3011	-9.85538						-0.8985	1.588	23.9931	-0.8985	23.4398	40.3876
												19.9219	-11.4597	-9.89799						-0.8975	0.515547	24.6353	-0.8975	21.0258	32.5853
												20.1172	-11.45	-9.76808						-0.8965	0.130351	24.8157	-0.8965	17.4723	23.6916
												20.3125	-11.8941	-9.71388						-0.8955	0.0256676	24.6319	-0.8955	17.4466	16.188
												20.5078	-11.7363	-10.3714						-0.8945	0.00393625	23.9746	-0.8945	23.8844	12.8307
												20.7031	-11.9401	-10.8068						-0.8935	0	22.6732	-0.8935	34.9502	14.5427
												20.8984	-11.7874	-10.8836						-0.8925	0	20.8358	-0.8925	44.9691	19.7364
												21.0938	-11.8742	-10.4524						-0.8915	0	18.9874	-0.8915	48.9674	26.0238
												21.2891	-11.8323	-10.6688						-0.8905	0	17.6649	-0.8905	46.4679	32.7469
												21.4844	-10.4957	-10.128						-0.8895	0	16.9098	-0.8895	40.2951	41.2369
												21.6797	-11.715	-10.5831						-0.8885	0	16.3151	-0.8885	32.8514	51.9063
												21.875	-12.2535	-10.7916						-0.8875	0	15.3112	-0.8875	25.4805	61.4628
												22.0703	-12.4892	-11.4782						-0.8865	0	13.3259	-0.8865	20.6622	64.067
												22.2656	-12.3259	-11.5067						-0.8855	0	10.1734	-0.8855	21.8813	56.2293
												22.4609	-12.3779	-11.3025						-0.8845	0	6.49094	-0.8845	29.9416	40.4948
												22.6562	-12.7326	-11.5401						-0.8835	0.00393625	3.34879	-0.8835	40.1077	23.5762
												22.8516	-12.87	-12.0611						-0.8825	0.0256676	1.37162	-0.8825	44.6224	11.0032
												23.0469	-12.946	-12.1636						-0.8815	0.130351	0.441561	-0.8815	39.4138	4.12702
												23.2422	-12.9352	-12.1466						-0.8805	0.515547	0.110798	-0.8805	27.8674	1.40719
												23.4375	-13.1239	-12.2793						-0.8795	1.588	0.0218175	-0.8795	17.3906	1.07754
												23.6328	-13.1916	-12.2604						-0.8785	3.80941	0.00669163	-0.8785	13.1947	2.50601
												23.8281	-13.2	-12.606						-0.8775	7.11691	0.0218175	-0.8775	15.3907	5.89335
												24.0234	-13.3337	-12.8171						-0.8765	10.355	0.110798	-0.8765	20.0594	10.9989
												24.2188	-13.7361	-13.1679						-0.8755	11.7338	0.441561	-0.8755	22.3093	16.0093
												24.4141	-13.9551	-13.4998						-0.8745	10.355	1.37162	-0.8745	19.8206	18.1859
												24.6094	-13.7631	-13.5147						-0.8735	7.11691	3.35214	-0.8735	14.4169	16.284
												24.8047	-13.7319	-13.2884						-0.8725	3.80941	6.50941	-0.8725	10.1951	12.1985
												25	-14.1471	-13.2663						-0.8715	1.588	10.2624	-0.8715	10.1951	9.93495
												25.1953	-14.2343	-13.6653						-0.8705	0.515547	13.6533	-0.8705	14.4169	13.2498
												25.3906	-14.223	-13.9147						-0.8695	0.130351	16.2228	-0.8695	19.8057	23.5762
												25.5859	-14.5781	-14.1523						-0.8685	0.0256676	18.2	-0.8685	22.2198	38.2421
												25.7812	-14.4739	-14.223						-0.8675	0.00393625	19.6993	-0.8675	19.6154	50.3817
												25.9766	-14.5024	-14.5144						-0.8665	0	20.3032	-0.8665	13.6893	53.0864
												26.1719	-14.9086	-14.4147						-0.8655	0	19.6993	-0.8655	8.16936	45.5389
												26.3672	-15.1558	-14.8257						-0.8645	0	18.2033	-0.8645	6.00654	34.1752
												26.5625	-15.1637	-15.0645						-0.8635	0	16.2446	-0.8635	8.21784	26.8211
												26.7578	-15.4332	-15.1032						-0.8625	0.00393625	13.7641	-0.8625	13.9429	26.6167
												26.9531	-15.8155	-15.5037						-0.8615	0.0256676	10.7039	-0.8615	20.6303	31.7036
												27.1484	-15.8585	-15.8337						-0.8605	0.130351	7.88102	-0.8605	25.4245	38.4435
												27.3438	-16.1403	-15.8494						-0.8595	0.515547	6.70428	-0.8595	27.7848	43.0969
												27.5391	-16.351	-15.9037						-0.8585	1.588	7.88102	-0.8585	30.1804	42.2072
												27.7344	-16.4649	-16.4515						-0.8575	3.80941	10.7039	-0.8575	35.1707	34.6621
												27.9297	-16.7864	-16.4551						-0.8565	7.11691	13.7641	-0.8565	42.5873	23.5912
												28.125	-16.9645	-16.515						-0.8555	10.355	16.2446	-0.8555	50.3439	14.4302
												28.3203	-17.2362	-16.7582						-0.8545	11.7338	18.2033	-0.8545	56.7864	10.8353
												28.5156	-17.3036	-16.6798						-0.8535	10.355	19.6993	-0.8535	61.0262	12.5985
												28.7109	-15.8649	-15.537						-0.8525	7.11691	20.3032	-0.8525	62.1468	16.4062
												28.9062	-14.5091	-12.2643						-0.8515	3.80941	19.6993	-0.8515	60.0878	18.2134
												29.1016	-13.5716	-10.4324						-0.8505	1.588	18.2	-0.8505	56.8944	16.0154
												29.2969	-8.6747	-9.45148						-0.8495	0.515547	16.2228	-0.8495	54.712	10.9989
												29.4922	-9.98821	-11.1747						-0.8485	0.130351	13.6533	-0.8485	52.4183	5.88727
												29.6875	-13.9097	-14.8012						-0.8475	0.0256676	10.2624	-0.8475	46.7265	2.45418
												29.8828	-15.0289	-14.7198						-0.8465	0.00393625	6.51275	-0.8465	37.2781	0.796755
												30.0781	-15.3439	-16.5979						-0.8455	0	3.37396	-0.8455	28.3751	0.201451
												30.2734	-12.7254	-16.7168						-0.8445	0	1.48241	-0.8445	24.6753	0.0396681
												30.4688	-16.0092	-17.2879						-0.8435	0	0.879776	-0.8435	26.5884	0.0060833
												30.6641	-18.691	-16.5961						-0.8425	0	1.4606	-0.8425	30.8256	0
												30.8594	-19.314	-18.2185						-0.8415	0	3.25981	-0.8415	34.286	0.0060833
												31.0547	-18.497	-18.6025						-0.8405	0	6.05272	-0.8405	36.155	0.0518347
												31.25	-20.0223	-19.21						-0.8395	0	8.80179	-0.8395	37.0548	0.280787
												31.4453	-19.2793	-18.8399						-0.8385	0	9.97708	-0.8385	37.9498	1.19966
												31.6406	-19.6744	-17.9688						-0.8375	0	8.82361	-0.8375	39.9755	4.04769
												31.8359	-20.8968	-18.0477						-0.8365	0	6.16017	-0.8365	44.0041	10.7956
												32.0312	-20.991	-16.8451						-0.8355	0	3.67621	-0.8355	49.5496	22.7734
												32.2266	-20.4705	-18.6982						-0.8345	0	2.6996	-0.8345	53.8381	38.0071
												32.4219	-18.8336	-19.8229						-0.8335	0	3.67621	-0.8335	52.9895	50.1802
												32.6172	-20.5527	-19.3372						-0.8325	0	6.16017	-0.8325	46.1405	52.4728
												32.8125	-21.7893	-19.6754						-0.8315	0	8.82361	-0.8315	38.0625	43.8021
												33.0078	-22.0612	-20.5749						-0.8305	0	9.97708	-0.8305	35.2759	30.3392
												33.2031	-21.5544	-20.7083						-0.8295	0	8.80179	-0.8295	39.0502	20.116
												33.3984	-21.6178	-20.7664						-0.8285	0	6.04937	-0.8285	43.6784	16.704
												33.5938	-22.337	-20.7036						-0.8275	0	3.238	-0.8275	42.2158	17.8043
												33.7891	-22.9355	-21.0102						-0.8265	0	1.3498	-0.8265	33.0995	18.6224
												33.9844	-23.3118	-21.2738						-0.8255	0	0.438215	-0.8255	20.6535	16.3298
												34.1797	-23.6291	-21.3699						-0.8245	0	0.110798	-0.8245	10.1951	12.0153
												34.375	-23.691	-22.0607						-0.8235	0	0.0218175	-0.8235	3.9808	9.18395
												34.5703	-23.9421	-22.7692						-0.8225	0	0.00334581	-0.8225	1.26851	11.0367
												34.7656	-24.05	-23.0552						-0.8215	0	0	-0.8215	0.540919	18.6872
												34.9609	-23.3318	-22.9103						-0.8205	0	0	-0.8205	1.02973	30.4942
												35.1562	-22.7079	-23.1053						-0.8195	0	0	-0.8195	3.00699	42.726
												35.3516	-24.0985	-23.6916						-0.8185	0	0	-0.8185	7.19555	51.872
												35.5469	-23.7476	-23.897						-0.8175	0	0	-0.8175	13.4505	56.6995
												35.7422	-23.3254	-23.0005						-0.8165	0	0	-0.8165	19.608	57.9089
												35.9375	-23.2922	-20.7934						-0.8155	0	0	-0.8155	22.4249	56.7346
												36.1328	-19.5496	-20.9897						-0.8145	0	0	-0.8145	20.6303	54.6374
												36.3281	-20.8352	-20.9677						-0.8135	0	0	-0.8135	16.935	53.106
												36.5234	-20.8111	-19.2084						-0.8125	0	0.00334581	-0.8125	16.3387	52.3847
												36.7188	-18.4693	-17.6229						-0.8115	0	0.0218175	-0.8115	22.4491	50.887
												36.9141	-17.1605	-17.5549						-0.8105	0	0.110798	-0.8105	34.9729	46.9222
												37.1094	-17.378	-17.5039						-0.8095	0	0.438215	-0.8095	49.5424	40.7359
												37.3047	-18.9237	-18.0672						-0.8085	0	1.3498	-0.8085	59.7009	33.9455
												37.5	-17.4919	-18.3802						-0.8075	0	3.238	-0.8075	60.7777	27.5591
												37.6953	-15.6594	-18.333						-0.8065	0	6.04937	-0.8065	53.5102	22.1509
												37.8906	-16.9526	-19.1815						-0.8055	0	8.80179	-0.8055	43.3361	19.49
												38.0859	-19.3189	-20.1221						-0.8045	0	9.97373	-0.8045	34.9729	22.0753
												38.2812	-20.17	-19.0363						-0.8035	0	8.80179	-0.8035	28.6554	30.4792
												38.4766	-18.8588	-18.8858						-0.8025	0	6.04937	-0.8025	22.5294	41.7375
												38.6719	-18.8941	-19.7978						-0.8015	0	3.238	-0.8015	16.9425	50.705
												38.8672	-20.8667	-22.4435						-0.8005	0	1.3498	-0.8005	14.4881	53.3954
												39.0625	-27.2915	-24.7665						-0.7995	0	0.438215	-0.7995	16.4575	49.7076
												39.2578	-27.2511	-26.596						-0.7985	0	0.110798	-0.7985	20.5408	42.9948
												39.4531	-28.4992	-27.768						-0.7975	0	0.0218175	-0.7975	22.4586	37.0352
												39.6484	-28.7476	-27.4101						-0.7965	0	0.00334581	-0.7965	19.8542	33.9069
												39.8438	-27.6549	-25.4439						-0.7955	0	0	-0.7955	14.4317	34.3404
												40.0391	-26.8714	-22.778						-0.7945	0	0	-0.7945	10.2436	38.659
												40.2344	-28.0393	-21.1731						-0.7935	0	0	-0.7935	10.4413	46.4218
												40.4297	-26.9205	-19.8617						-0.7925	0	0	-0.7925	15.3907	54.8192
												40.625	-27.0321	-20.1616						-0.7915	0	0	-0.7915	22.8053	58.4058
												40.8203	-26.1203	-22.1523						-0.7905	0	0.00334581	-0.7905	29.4153	52.8755
												41.0156	-24.6805	-22.2703						-0.7895	0	0.0218175	-0.7895	33.0585	39.8081
												41.2109	-26.1634	-21.3926						-0.7885	0	0.110798	-0.7885	33.2562	26.2654
												41.4062	-22.848	-20.4349						-0.7875	0	0.438215	-0.7875	30.3966	19.3782
												41.6016	-20.42	-19.9223						-0.7865	0	1.3498	-0.7865	25.9018	21.7367
												41.7969	-21.1878	-21.0115						-0.7855	0	3.238	-0.7855	23.0787	30.662
												41.9922	-23.5076	-23.2961						-0.7845	0	6.04937	-0.7845	25.832	40.345
												42.1875	-27.2235	-26.6909						-0.7835	0	8.80179	-0.7835	35.8022	45.3895
												42.3828	-26.9027	-27.4809						-0.7825	0	9.97373	-0.7825	50.9867	43.8082
												42.5781	-27.7214	-28.4206						-0.7815	0	8.80179	-0.7815	66.2999	37.4744
												42.7734	-29.4487	-30.3905						-0.7805	0	6.04937	-0.7805	75.0207	30.232
												42.9688	-31.2357	-30.468						-0.7795	0	3.238	-0.7795	72.064	25.2487
												43.1641	-31.1832	-29.6354						-0.7785	0	1.3498	-0.7785	58.5612	22.8887
												43.3594	-31.6822	-30.1281						-0.7775	0	0.438215	-0.7775	42.251	20.8294
												43.5547	-32.15	-31.3546						-0.7765	0	0.110798	-0.7765	31.0799	16.8458
												43.75	-30.262	-31.1798						-0.7755	0	0.0218175	-0.7755	26.5809	11.2064
												43.9453	-28.6494	-30.1656						-0.7745	0	0.00334581	-0.7745	24.3651	5.92694
												44.1406	-27.879	-30.1495						-0.7735	0	0.00334581	-0.7735	20.1004	2.46026
												44.3359	-29.2517	-29.8481						-0.7725	0	0.0218175	-0.7725	13.5475	0.796755
												44.5312	-29.9596	-29.7218						-0.7715	0	0.110798	-0.7715	7.21042	0.207534
												44.7266	-30.2429	-29.568						-0.7705	0	0.438215	-0.7705	3.00699	0.0854195
												44.9219	-30.4445	-29.8159						-0.7695	0	1.3498	-0.7695	1.02973	0.247203
												45.1172	-32.4392	-32.2136						-0.7685	0	3.238	-0.7685	0.540919	0.998206
												45.3125	-35.0414	-34.2938						-0.7675	0	6.04937	-0.7675	1.26851	3.25093
												45.5078	-35.6499	-35.246						-0.7665	0	8.80179	-0.7665	3.9808	8.34144
												45.7031	-35.5726	-35.2904						-0.7655	0	9.97373	-0.7655	10.1951	16.8861
												45.8984	-35.0735	-35.3188						-0.7645	0	8.80179	-0.7645	20.6386	27.0082
												46.0938	-35.7319	-35.5544						-0.7635	0	6.04937	-0.7635	33.0026	34.177
												46.2891	-35.5614	-35.5063						-0.7625	0	3.24134	-0.7625	41.7382	34.3448
												46.4844	-35.9516	-36.0951						-0.7615	0	1.37162	-0.7615	41.8203	27.8446
												46.6797	-36.5192	-36.7532						-0.7605	0	0.549013	-0.7605	33.5025	19.5814
												46.875	-36.6024	-36.8247						-0.7595	0	0.549013	-0.7595	22.6421	15.233
												47.0703	-36.3153	-36.4389						-0.7585	0	1.37162	-0.7585	16.4889	17.5465
												47.2656	-37.4178	-36.9187						-0.7575	0	3.24134	-0.7575	19.5845	25.584
												47.4609	-37.8601	-37.5443						-0.7565	0	6.04937	-0.7565	32.0869	36.2595
												47.6562	-36.8014	-36.5154						-0.7555	0	8.80179	-0.7555	49.6573	46.302
												47.8516	-37.1882	-36.1962						-0.7545	0	9.97373	-0.7545	65.2684	53.4837
												48.0469	-37.5771	-36.5616						-0.7535	0	8.80179	-0.7535	73.1029	56.9107
												48.2422	-37.9826	-37.4685						-0.7525	0	6.04937	-0.7525	71.609	56.4584
												48.4375	-39.0242	-38.9077						-0.7515	0	3.238	-0.7515	63.3175	51.8202
												48.6328	-38.9895	-39.1719						-0.7505	0	1.3498	-0.7505	52.5007	42.6863
												48.8281	-39.0242	-39.3856						-0.7495	0	0.438215	-0.7495	42.4479	30.3445
												49.0234	-39.3196	-39.2683						-0.7485	0	0.110798	-0.7485	34.1273	18.1712
												49.2188	-39.8823	-39.1813						-0.7475	0	0.0218175	-0.7475	27.8979	9.7883
												49.4141	-40.141	-39.6176						-0.7465	0	0.00334581	-0.7465	26.0931	7.39012
												49.6094	-40.3312	-39.8349						-0.7455	0	0	-0.7455	32.1171	12.041
												49.8047	-40.4709	-40.1273						-0.7445	0	0	-0.7445	46.3501	24.0249
												50	-40.4265	-40.3345						-0.7435	0	0	-0.7435	63.8357	41.3831
																				-0.7425	0	0	-0.7425	76.9198	58.9307
																				-0.7415	0	0	-0.7415	80.7735	70.9585
																				-0.7405	0	0	-0.7405	76.7605	75.7583
																				-0.7395	0	0	-0.7395	70.0838	76.4921
																				-0.7385	0	0	-0.7385	63.731	77.2553
																				-0.7375	0	0	-0.7375	55.7428	79.0032
																				-0.7365	0	0	-0.7365	43.3871	79.5075
																				-0.7355	0	0	-0.7355	28.1695	76.6929
																				-0.7345	0	0	-0.7345	14.7417	71.2362
																				-0.7335	0	0	-0.7335	6.30124	65.6033
																				-0.7325	0	0	-0.7325	2.92887	61.878
																				-0.7315	0	0.00334581	-0.7315	3.49199	61.3275
																				-0.7305	0	0.0218175	-0.7305	7.29251	64.1231
																				-0.7295	0	0.110798	-0.7295	13.4579	67.7284
																				-0.7285	0	0.438215	-0.7285	19.5595	67.101
																				-0.7275	0	1.3498	-0.7275	22.1713	59.2696
																				-0.7265	0	3.238	-0.7265	19.608	48.2024
																				-0.7255	0	6.04937	-0.7255	13.6893	43.6016
																				-0.7245	0	8.80179	-0.7245	8.16936	53.4037
																				-0.7235	0	9.97373	-0.7235	5.9991	76.217
																				-0.7225	0	8.80513	-0.7225	8.16936	100.732
																				-0.7215	0	6.07119	-0.7215	13.6893	114.285
																				-0.7205	0	3.34879	-0.7205	19.608	113.421
																				-0.7195	0	1.78801	-0.7195	22.1713	104.669
																				-0.7185	0	1.78801	-0.7185	19.5595	94.7084
																				-0.7175	0	3.34879	-0.7175	13.4505	83.1179
																				-0.7165	0	6.07119	-0.7165	7.24403	66.3929
																				-0.7155	0	8.80513	-0.7155	3.24577	45.4084
																				-0.7145	0	9.97373	-0.7145	1.94762	25.7677
																				-0.7135	0	8.80179	-0.7135	3.2532	12.4867
																				-0.7125	0	6.04937	-0.7125	7.29251	6.91693
																				-0.7115	0	3.238	-0.7115	13.7041	7.96302
																				-0.7105	0	1.3498	-0.7105	20.5818	13.9474
																				-0.7095	0	0.438215	-0.7095	25.4096	22.7849
																				-0.7085	0	0.110798	-0.7085	27.7289	31.8404
																				-0.7075	0	0.0218175	-0.7075	29.8931	38.9316
																				-0.7065	0	0.00334581	-0.7065	33.9991	43.5842
																				-0.7055	0	0	-0.7055	38.8601	47.0381
																				-0.7045	0	0	-0.7045	41.1152	50.9671
																				-0.7035	0	0	-0.7035	39.0989	55.7842
																				-0.7025	0	0	-0.7025	34.9804	59.6332
																				-0.7015	0	0	-0.7015	32.9411	59.5595
																				-0.7005	0	0	-0.7005	35.1707	54.6834
																				-0.6995	0	0	-0.6995	39.8265	47.9756
																				-0.6985	0	0	-0.6985	43.1409	43.8925
																				-0.6975	0	0	-0.6975	43.0561	44.1981
																				-0.6965	0	0	-0.6965	40.2466	46.4699
																				-0.6955	0	0	-0.6955	36.0096	46.2198
																				-0.6945	0	0	-0.6945	30.3332	40.519
																				-0.6935	0	0	-0.6935	22.8127	30.5399
																				-0.6925	0	0.00334581	-0.6925	14.5138	21.1414
																				-0.6915	0	0.0218175	-0.6915	7.69542	17.6811
																				-0.6905	0	0.110798	-0.6905	4.02185	22.6309
																				-0.6895	0	0.438215	-0.6895	3.9808	33.8937
																				-0.6885	0	1.3498	-0.6885	7.44177	45.3895
																				-0.6875	0	3.238	-0.6875	13.4915	50.2717
																				-0.6865	0	6.04937	-0.6865	19.567	45.5909
																				-0.6855	0	8.80179	-0.6855	22.1638	34.724
																				-0.6845	0	9.97373	-0.6845	19.5595	25.2469
																				-0.6835	0	8.80179	-0.6835	13.4431	24.1698
																				-0.6825	0	6.04937	-0.6825	7.19555	33.8312
																				-0.6815	0	3.238	-0.6815	3.00699	50.132
																				-0.6805	0	1.3498	-0.6805	1.02229	64.3142
																				-0.6795	0	0.438215	-0.6795	0.492436	68.6498
																				-0.6785	0	0.110798	-0.6785	1.02229	62.0741
																				-0.6775	0	0.0218175	-0.6775	3.01442	50.0166
																				-0.6765	0	0.00669163	-0.6765	7.24403	38.7959
																				-0.6755	0	0.0218175	-0.6755	13.6967	31.326
																				-0.6745	0	0.110798	-0.6745	20.5818	28.0382
																				-0.6735	0	0.438215	-0.6735	25.4096	29.164
																				-0.6725	0	1.3498	-0.6725	27.7289	33.9394
																				-0.6715	0	3.238	-0.6715	29.8857	39.0914
																				-0.6705	0	6.04937	-0.6705	33.9506	40.8274
																				-0.6695	0	8.80179	-0.6695	38.6139	38.2024
																				-0.6685	0	9.97373	-0.6685	40.1414	32.9412
																				-0.6675	0	8.80179	-0.6675	36.0993	26.5609
																				-0.6665	0	6.04937	-0.6665	27.7774	19.6632
																				-0.6655	0	3.238	-0.6655	19.4496	13.6302
																				-0.6645	0	1.3498	-0.6645	15.3649	11.2382
																				-0.6635	0	0.438215	-0.6635	16.6888	15.0834
																				-0.6625	0	0.110798	-0.6625	20.5818	25.3341
																				-0.6615	0	0.0218175	-0.6615	22.4175	38.4981
																				-0.6605	0	0.00669163	-0.6605	19.608	48.9002
																				-0.6595	0	0.0218175	-0.6595	13.4579	52.9242
																				-0.6585	0	0.110798	-0.6585	7.24403	51.9063
																				-0.6575	0	0.441561	-0.6575	3.24577	49.7816
																				-0.6565	0	1.37162	-0.6565	1.95506	47.9534
																				-0.6555	0	3.34879	-0.6555	3.30169	43.9503
																				-0.6545	0	6.48759	-0.6545	7.53873	35.6603
																				-0.6535	0	10.1516	-0.6535	14.6705	25.328
																				-0.6525	0	13.2117	-0.6525	23.5552	17.8754
																				-0.6515	0	14.8512	-0.6515	32.5044	15.9469
																				-0.6505	0	14.8512	-0.6505	40.9442	17.6028
																				-0.6495	0	13.2117	-0.6495	49.4156	18.5491
																				-0.6485	0	10.1516	-0.6485	58.1638	16.168
																				-0.6475	0	6.48759	-0.6475	67.2834	11.4597
																				-0.6465	0	3.34879	-0.6465	77.3051	7.72798
																				-0.6455	0	1.37162	-0.6455	86.759	8.40041
																				-0.6445	0	0.441561	-0.6445	90.1782	16.0298
																				-0.6435	0	0.110798	-0.6435	82.2189	31.377
																				-0.6425	0	0.0218175	-0.6425	63.713	51.5879
																				-0.6415	0	0.00334581	-0.6415	41.4483	69.9603
																				-0.6405	0	0	-0.6405	22.5461	79.609
																				-0.6395	0	0	-0.6395	10.3706	78.1049
																				-0.6385	0	0	-0.6385	4.71202	68.3186
																				-0.6375	0	0	-0.6375	4.11881	55.4342
																				-0.6365	0	0	-0.6365	7.46407	44.1777
																				-0.6355	0	0	-0.6355	13.4915	38.1156
																				-0.6345	0	0	-0.6345	19.567	38.9825
																				-0.6335	0	0	-0.6335	22.1638	44.8432
																				-0.6325	0	0	-0.6325	19.567	50.0538
																				-0.6315	0	0	-0.6315	13.499	49.2948
																				-0.6305	0	0	-0.6305	7.49025	42.1343
																				-0.6295	0	0.00334581	-0.6295	4.21958	33.5226
																				-0.6285	0	0.0218175	-0.6285	4.94717	30.142
																				-0.6275	0	0.110798	-0.6275	10.4488	35.3719
																				-0.6265	0	0.438215	-0.6265	20.7356	45.9021
																				-0.6255	0	1.3498	-0.6255	33.2562	53.3489
																				-0.6245	0	3.238	-0.6245	42.6972	51.157
																				-0.6235	0	6.04937	-0.6235	44.7229	40.5345
																				-0.6225	0	8.80179	-0.6225	40.1981	28.8682
																				-0.6215	0	9.97373	-0.6215	34.0891	22.5973
																				-0.6205	0	8.80179	-0.6205	29.8031	22.5509
																				-0.6195	0	6.04937	-0.6195	26.3834	25.4621
																				-0.6185	0	3.238	-0.6185	21.7534	28.2811
																				-0.6175	0	1.3498	-0.6175	16.7373	30.3049
																				-0.6165	0	0.438215	-0.6165	14.4545	32.3689
																				-0.6155	0	0.110798	-0.6155	16.4985	35.3496
																				-0.6145	0	0.0218175	-0.6145	20.7796	38.8374
																				-0.6135	0	0.00669163	-0.6135	23.3839	40.4275
																				-0.6125	0	0.0218175	-0.6125	22.6076	37.4279
																				-0.6115	0	0.110798	-0.6115	20.646	30.2591
																				-0.6105	0	0.438215	-0.6105	20.6386	22.9748
																				-0.6095	0	1.3498	-0.6095	22.5591	19.3921
																				-0.6085	0	3.238	-0.6085	23.1377	19.3396
																				-0.6075	0	6.04937	-0.6075	19.8057	19.5413
																				-0.6065	0	8.80179	-0.6065	13.4915	17.8775
																				-0.6055	0	9.97373	-0.6055	7.20298	16.1544
																				-0.6045	0.00393625	8.80179	-0.6045	3.00699	18.4707
																				-0.6035	0.0256676	6.04937	-0.6035	1.02229	26.9457
																				-0.6025	0.130351	3.238	-0.6025	0.492436	38.892
																				-0.6015	0.515547	1.3498	-0.6015	1.02229	48.2713
																				-0.6005	1.588	0.438215	-0.6005	3.00699	50.5433
																				-0.5995	3.80941	0.110798	-0.5995	7.19555	46.2266
																				-0.5985	7.12085	0.0218175	-0.5985	13.4431	39.5734
																				-0.5975	10.3807	0.00334581	-0.5975	19.5595	34.3646
																				-0.5965	11.8681	0	-0.5965	22.1638	31.5021
																				-0.5955	10.8963	0	-0.5955	19.5595	29.8592
																				-0.5945	8.83526	0	-0.5945	13.4431	27.8782
																				-0.5935	8.1383	0	-0.5935	7.19555	24.2349
																				-0.5925	10.3186	0	-0.5925	2.99955	18.4971
																				-0.5915	14.8143	0	-0.5915	0.973812	11.8078
																				-0.5905	19.5223	0	-0.5905	0.246218	6.13447
																				-0.5895	22.4541	0	-0.5895	0.0484832	2.74105
																				-0.5885	23.1835	0	-0.5885	0.00743514	1.84071
																				-0.5875	22.895	0	-0.5875	0	3.65384
																				-0.5865	22.9997	0	-0.5865	0	9.17787
																				-0.5855	23.6912	0	-0.5855	0	19.3525
																				-0.5845	24.0204	0	-0.5845	0	32.929
																				-0.5835	23.227	0	-0.5835	0	45.3437
																				-0.5825	21.546	0	-0.5825	0	50.977
																				-0.5815	19.6012	0	-0.5815	0	47.7979
																				-0.5805	17.6507	0	-0.5805	0	39.6131
																				-0.5795	15.8828	0	-0.5795	0	32.9948
																				-0.5785	14.775	0	-0.5785	0	31.8255
																				-0.5775	14.2987	0	-0.5775	0	35.0395
																				-0.5765	13.3475	0	-0.5765	0	38.9316
																				-0.5755	10.8785	0	-0.5755	0.00743514	40.379
																				-0.5745	7.27293	0	-0.5745	0.0559184	37.9395
																				-0.5735	3.96543	0	-0.5735	0.294701	31.5932
																				-0.5725	2.10748	0	-0.5725	1.22003	22.6994
																				-0.5715	2.10354	0	-0.5715	3.98823	13.7338
																				-0.5705	3.93976	0	-0.5705	10.2921	7.13268
																				-0.5695	7.14258	0	-0.5695	21.131	4.29489
																				-0.5685	10.3629	0.00334581	-0.5685	34.9576	5.94623
																				-0.5675	11.7595	0.0218175	-0.5675	47.771	12.7788
																				-0.5665	10.4854	0.110798	-0.5665	56.3607	24.4916
																				-0.5655	7.63246	0.438215	-0.5655	60.8625	37.8999
																				-0.5645	5.40134	1.3498	-0.5645	62.7572	47.267
																				-0.5635	5.42307	3.238	-0.5635	61.7183	48.0098
																				-0.5625	7.76281	6.04937	-0.5625	56.5355	40.1318
																				-0.5615	11.0009	8.80179	-0.5615	47.6657	27.7778
																				-0.5605	13.3475	9.97373	-0.5605	36.8496	15.9133
																				-0.5595	14.1684	8.80179	-0.5595	25.622	7.52044
																				-0.5585	14.2338	6.04937	-0.5585	15.4466	3.06461
																				-0.5575	14.1684	3.238	-0.5575	7.9342	1.71251
																				-0.5565	13.3475	1.3498	-0.5565	4.07033	2.87533
																				-0.5555	11.0049	0.438215	-0.5555	3.98823	6.76336
																				-0.5545	7.78848	0.110798	-0.5545	7.44177	13.6606
																				-0.5535	5.55342	0.0218175	-0.5535	13.4915	22.6873
																				-0.5525	5.91689	0.00334581	-0.5525	19.5744	31.5932
																				-0.5515	9.22439	0	-0.5515	22.2123	37.9395
																				-0.5505	14.3205	0	-0.5505	19.8057	40.3729
																				-0.5495	19.0107	0.00334581	-0.5495	14.4169	38.892
																				-0.5485	21.2552	0.0218175	-0.5485	10.1951	34.838
																				-0.5475	20.5691	0.110798	-0.5475	10.2025	31.0287
																				-0.5465	18.4894	0.438215	-0.5465	14.4653	30.5406
																				-0.5455	17.4138	1.3498	-0.5455	20.052	33.7319
																				-0.5445	18.5151	3.238	-0.5445	23.1936	36.8387
																				-0.5435	20.6994	6.04937	-0.5435	22.615	35.1752
																				-0.5425	21.7708	8.80179	-0.5425	20.8848	28.0064
																				-0.5415	20.5987	9.97373	-0.5415	21.6124	19.38
																				-0.5405	18.1299	8.80179	-0.5405	25.5586	14.2348
																				-0.5395	16.3413	6.04937	-0.5395	30.3332	14.2498
																				-0.5385	16.268	3.238	-0.5385	33.2488	17.0136
																				-0.5375	17.2655	1.3498	-0.5375	33.0511	18.4545
																				-0.5365	18.0388	0.438215	-0.5365	29.3743	16.4641
																				-0.5355	17.7366	0.110798	-0.5355	22.6076	12.6778
																				-0.5345	16.0844	0.0218175	-0.5345	14.6705	11.2107
																				-0.5335	13.535	0.00334581	-0.5335	8.46406	15.9016
																				-0.5325	11.4419	0	-0.5325	6.2938	28.1057
																				-0.5315	11.0567	0	-0.5315	9.15061	45.5821
																				-0.5305	11.9687	0.00334581	-0.5305	16.6963	63.2596
																				-0.5295	12.2533	0.0218175	-0.5295	26.852	76.0469
																				-0.5285	10.4854	0.110798	-0.5285	35.8606	81.3472
																				-0.5275	7.14258	0.438215	-0.5275	40.0929	79.4871
																				-0.5265	3.81334	1.3498	-0.5265	38.6139	73.3564
																				-0.5255	1.588	3.238	-0.5255	33.9991	68.2191
																				-0.5245	0.515547	6.04937	-0.5245	30.1319	69.6234
																				-0.5235	0.130351	8.80179	-0.5235	28.7027	79.1632
																				-0.5225	0.0256676	9.97373	-0.5225	28.4092	92.6086
																				-0.5215	0.00393625	8.80179	-0.5215	27.7848	103.577
																				-0.5205	0	6.04937	-0.5205	27.1882	108.88
																				-0.5195	0	3.238	-0.5195	27.0498	109.287
																				-0.5185	0	1.3498	-0.5185	26.1521	105.874
																				-0.5175	0	0.438215	-0.5175	23.5814	97.9528
																				-0.5165	0	0.110798	-0.5165	21.131	85.5653
																				-0.5155	0	0.0218175	-0.5155	21.6609	71.9386
																				-0.5145	0	0.00334581	-0.5145	25.5735	61.3711
																				-0.5135	0	0	-0.5135	30.3891	55.0586
																				-0.5125	0	0	-0.5125	33.5435	50.2675
																				-0.5115	0	0	-0.5115	34.2785	43.9317
																				-0.5105	0	0	-0.5105	33.3887	36.479
																				-0.5095	0	0	-0.5095	33.0004	31.4685
																				-0.5085	0	0	-0.5085	36.0367	31.6513
																				-0.5075	0	0	-0.5075	43.4924	36.5566
																				-0.5065	0	0	-0.5065	52.2132	44.249
																				-0.5055	0	0	-0.5055	57.1215	53.9485
																				-0.5045	0	0	-0.5045	55.8079	65.682
																				-0.5035	0	0	-0.5035	50.0539	78.0359
																				-0.5025	0.00393625	0	-0.5025	43.2536	87.6829
																				-0.5015	0.0256676	0	-0.5015	37.2222	91.3677
																				-0.5005	0.130351	0	-0.5005	31.5532	87.9179
																				-0.4995	0.515547	0	-0.4995	25.8608	79.0281
																				-0.4985	1.588	0	-0.4985	21.7168	68.8933
																				-0.4975	3.80941	0	-0.4975	21.1385	62.0885
																				-0.4965	7.11691	0	-0.4965	23.5814	60.3323
																				-0.4955	10.355	0	-0.4955	26.1446	61.0649
																				-0.4945	11.7338	0	-0.4945	27.0013	59.6938
																				-0.4935	10.355	0	-0.4935	26.9346	53.7645
																				-0.4925	7.11691	0	-0.4925	26.7625	44.7887
																				-0.4915	3.80941	0	-0.4915	25.1634	35.838
																				-0.4905	1.588	0	-0.4905	20.5333	28.5634
																				-0.4895	0.515547	0	-0.4895	13.6893	23.7902
																				-0.4885	0.130351	0	-0.4885	7.24403	24.0442
																				-0.4875	0.0256676	0	-0.4875	3.00699	33.0471
																				-0.4865	0.00393625	0	-0.4865	0.973812	51.7788
																				-0.4855	0	0	-0.4855	0.246218	75.7132
																				-0.4845	0	0	-0.4845	0.0633535	96.9817
																				-0.4835	0	0	-0.4835	0.104402	109.914
																				-0.4825	0	0	-0.4825	0.492436	114.176
																				-0.4815	0	0.00334581	-0.4815	1.94762	112.243
																				-0.4805	0	0.0218175	-0.4805	5.9991	105.155
																				-0.4795	0	0.110798	-0.4795	14.3911	92.8473
																				-0.4785	0	0.438215	-0.4785	26.8861	77.8745
																				-0.4775	0	1.35314	-0.4775	39.1191	65.3104
																				-0.4765	0	3.25981	-0.4765	44.3277	57.959
																				-0.4755	0	6.16686	-0.4755	39.1191	54.1837
																				-0.4745	0	9.28364	-0.4745	26.8861	50.9409
																				-0.4735	0	11.5451	-0.4735	14.3911	46.7027
																				-0.4725	0	12.9162	-0.4725	5.9991	41.2362
																				-0.4715	0	14.7983	-0.4715	1.94762	34.8563
																				-0.4705	0	18.5158	-0.4705	0.492436	28.8217
																				-0.4695	0	23.4223	-0.4695	0.0969664	24.9341
																				-0.4685	0	26.8469	-0.4685	0.0148703	23.7312
																				-0.4675	0	26.1295	-0.4675	0.00743514	24.0467
																				-0.4665	0	20.9742	-0.4665	0.0484832	25.1811
																				-0.4655	0	13.8901	-0.4655	0.246218	28.1047
																				-0.4645	0	8.26401	-0.4645	0.973812	33.0084
																				-0.4635	0	6.04839	-0.4635	3.00699	37.0005
																				-0.4625	0	6.94762	-0.4625	7.25147	36.5276
																				-0.4615	0	9.02673	-0.4615	13.7452	32.1119
																				-0.4605	0	10.0207	-0.4605	20.8429	28.7125
																				-0.4595	0	8.8303	-0.4595	26.4804	30.4246
																				-0.4585	0	6.16017	-0.4585	31.2209	35.6603
																				-0.4575	0	3.67621	-0.4575	39.0288	38.872
																				-0.4565	0	2.6996	-0.4565	53.3928	37.2475
																				-0.4555	0	3.67621	-0.4555	72.5645	34.3063
																				-0.4545	0	6.16017	-0.4545	89.1913	35.8205
																				-0.4535	0	8.82361	-0.4535	94.7779	43.6578
																				-0.4525	0	9.98042	-0.4525	85.5481	55.5427
																				-0.4515	0	8.82361	-0.4515	65.7642	69.4326
																				-0.4505	0	6.16017	-0.4505	45.2506	84.4227
																				-0.4495	0	3.67956	-0.4495	32.0612	96.9474
																				-0.4485	0	2.72141	-0.4485	26.8756	100.197
																				-0.4475	0	3.78701	-0.4475	24.6598	89.8144
																				-0.4465	0	6.59839	-0.4465	21.0817	68.7154
																				-0.4455	0	10.1767	-0.4455	16.547	45.3578
																				-0.4445	0	13.2402	-0.4445	14.406	28.3085
																				-0.4435	0	14.9838	-0.4435	16.45	22.1124
																				-0.4425	0	15.4069	-0.4425	20.5818	25.7309
																				-0.4415	0	15.0434	-0.4415	22.6563	33.1023
																				-0.4405	0	14.9643	-0.4405	20.5818	36.5611
																				-0.4395	0	16.6766	-0.4395	16.45	32.2537
																				-0.4385	0	21.0322	-0.4385	14.3911	22.8066
																				-0.4375	0	27.1721	-0.4375	16.4426	14.2684
																				-0.4365	0	33.1072	-0.4365	20.5333	11.0032
																				-0.4355	0.00393625	37.1751	-0.4355	22.4101	13.4349
																				-0.4345	0.0256676	38.6582	-0.4345	19.608	19.1136
																				-0.4335	0.130351	37.5093	-0.4335	13.4579	25.1782
																				-0.4325	0.515547	34.1447	-0.4325	7.24403	30.6681
																				-0.4315	1.588	29.5875	-0.4315	3.24577	36.9371
																				-0.4305	3.80941	25.5241	-0.4305	1.95506	45.8158
																				-0.4295	7.11691	23.6071	-0.4295	3.29425	57.2341
																				-0.4285	10.355	24.2283	-0.4285	7.49025	67.9307
																				-0.4275	11.7338	26.1478	-0.4275	14.4243	72.2325
																				-0.4265	10.355	27.6286	-0.4265	22.5591	65.7641
																				-0.4255	7.11691	28.1979	-0.4255	29.3594	49.7016
																				-0.4245	3.80941	29.2149	-0.4245	33.0026	30.5803
																				-0.4235	1.588	32.1119	-0.4235	33.0026	15.2666
																				-0.4225	0.515547	36.0696	-0.4225	29.3594	6.71548
																				-0.4215	0.130351	38.4401	-0.4215	22.5591	4.33456
																				-0.4205	0.0256676	37.8165	-0.4205	14.4169	6.57704
																				-0.4195	0.00393625	35.6102	-0.4195	7.44177	12.0825
																				-0.4185	0	34.2253	-0.4185	3.04803	19.2664
																				-0.4175	0	34.5528	-0.4175	0.981247	26.4755
																				-0.4165	0	35.5377	-0.4165	0.246218	32.8894
																				-0.4155	0	35.4011	-0.4155	0.0484832	38.0071
																				-0.4145	0	32.9798	-0.4145	0.00743514	40.0642
																				-0.4135	0	28.4724	-0.4135	0	36.7929
																				-0.4125	0	23.1737	-0.4125	0	28.5956
																				-0.4115	0	18.4878	-0.4115	0	19.5418
																				-0.4105	0	15.4428	-0.4105	0.00743514	14.2684
																				-0.4095	0	14.8992	-0.4095	0.0484832	14.2559
																				-0.4085	0	17.2941	-0.4085	0.246218	17.0015
																				-0.4075	0.00393625	22.0262	-0.4075	0.973812	18.3752
																				-0.4065	0.0256676	27.4467	-0.4065	2.99955	16.0551
																				-0.4055	0.130351	31.4266	-0.4055	7.20298	11.0507
																				-0.4045	0.515547	32.2087	-0.4045	13.4915	6.12839
																				-0.4035	1.588	29.5268	-0.4035	19.8132	3.45847
																				-0.4025	3.80941	25.015	-0.4025	23.1861	4.10561
																				-0.4015	7.11691	20.9029	-0.4015	22.8053	8.86335
																				-0.4005	10.355	18.2814	-0.4005	21.6124	18.333
																				-0.3995	11.7338	16.8641	-0.3995	23.6382	31.8923
																				-0.3985	10.355	15.8636	-0.3985	29.7546	47.5946
																				-0.3975	7.11691	14.7193	-0.3975	36.5882	63.6344
																				-0.3965	3.80941	13.5289	-0.3965	39.4138	78.6576
																				-0.3955	1.588	13.0003	-0.3955	35.9016	89.714
																				-0.3945	0.515547	13.6145	-0.3945	27.7363	92.1999
																				-0.3935	0.130351	15.0434	-0.3935	19.4422	84.1561
																				-0.3925	0.0256676	16.7567	-0.3925	15.3649	69.0607
																				-0.3915	0.00393625	18.66	-0.3915	16.6963	52.6108
																				-0.3905	0	20.7469	-0.3905	20.6303	38.3819
																				-0.3895	0	22.6547	-0.3895	22.6637	27.9804
																				-0.3885	0	23.9713	-0.3885	20.5893	23.4367
																				-0.3875	0	24.6319	-0.3875	16.4985	26.9462
																				-0.3865	0	24.8157	-0.3865	14.6373	38.0296
																				-0.3855	0	24.6353	-0.3855	17.4164	51.9392
																				-0.3845	0	23.9931	-0.3845	23.5329	61.7499
																				-0.3835	0	22.7622	-0.3835	29.6056	62.7787
																				-0.3825	0	21.1666	-0.3825	33.0511	55.9775
																				-0.3815	0	19.9208	-0.3815	33.0249	47.3256
																				-0.3805	0	19.6639	-0.3805	29.4564	42.9712
																				-0.3795	0	20.1594	-0.3795	23.0515	44.0018
																				-0.3785	0	20.4207	-0.3785	16.3645	46.4503
																				-0.3775	0	19.743	-0.3775	13.4409	46.5553
																				-0.3765	0	18.3141	-0.3765	17.4391	44.4162
																				-0.3755	0	16.6643	-0.3755	27.8674	42.1589
																				-0.3745	0	15.0249	-0.3745	39.3727	41.0083
																				-0.3735	0	13.6145	-0.3735	44.4247	41.7296
																				-0.3725	0	13.0188	-0.3725	39.3727	45.9032
																				-0.3715	0	13.6145	-0.3715	27.8599	54.1951
																				-0.3705	0	15.0216	-0.3705	17.3906	63.5604
																				-0.3695	0	16.6459	-0.3695	13.1947	68.5815
																				-0.3685	0	18.2218	-0.3685	15.3907	66.5291
																				-0.3675	0	19.3937	-0.3675	20.0594	59.6857
																				-0.3665	0	19.3949	-0.3665	22.3167	52.2018
																				-0.3655	0	17.8111	-0.3655	19.8691	46.0444
																				-0.3645	0	15.3886	-0.3645	14.6631	40.4916
																				-0.3635	0	13.4704	-0.3635	11.1689	34.5235
																				-0.3625	0	12.4813	-0.3625	13.1947	28.8614
																				-0.3615	0	11.4343	-0.3615	21.6124	25.4684
																				-0.3605	0	9.26182	-0.3605	33.2488	25.2208
																				-0.3595	0	6.16352	-0.3595	41.7719	26.8845
																				-0.3585	0	3.25981	-0.3585	41.7308	28.6475
																				-0.3575	0	1.35314	-0.3575	33.0026	29.7432
																				-0.3565	0	0.438215	-0.3565	20.6386	30.3512
																				-0.3555	0	0.110798	-0.3555	10.2025	31.0559
																				-0.3545	0	0.0218175	-0.3545	4.02185	32.7133
																				-0.3535	0	0.00334581	-0.3535	1.46625	36.0431
																				-0.3525	0	0	-0.3525	1.26851	40.7359
																				-0.3515	0	0	-0.3515	3.0629	44.8064
																				-0.3505	0	0.00334581	-0.3505	7.25147	45.6139
																				-0.3495	0	0.0251633	-0.3495	13.6893	42.8815
																				-0.3485	0	0.132616	-0.3485	20.5333	39.8881
																				-0.3475	0	0.549013	-0.3475	25.1634	39.7809
																				-0.3465	0	1.78801	-0.3465	26.7551	41.5853
																				-0.3455	0	4.59114	-0.3455	26.8861	41.8653
																				-0.3445	0	9.30919	-0.3445	26.7551	39.4082
																				-0.3435	0	14.962	-0.3435	25.1708	36.2654
																				-0.3425	0	19.2137	-0.3425	20.5818	35.0702
																				-0.3415	0	20.1253	-0.3415	13.9355	37.1446
																				-0.3405	0	18.0892	-0.3405	8.22528	42.2898
																				-0.3395	0	15.3367	-0.3395	6.05502	48.8086
																				-0.3385	0	13.3896	-0.3385	8.41558	54.3201
																				-0.3375	0	11.7617	-0.3375	14.6631	57.2612
																				-0.3365	0	9.3508	-0.3365	22.6076	57.1122
																				-0.3355	0.00393625	6.18534	-0.3355	29.3668	53.5173
																				-0.3345	0.0256676	3.28498	-0.3345	33.0026	46.2624
																				-0.3335	0.130351	1.46394	-0.3335	33.0026	36.0245
																				-0.3325	0.515547	0.879776	-0.3325	29.3594	24.6255
																				-0.3315	1.588	1.48241	-0.3315	22.5591	14.497
																				-0.3305	3.80941	3.37396	-0.3305	14.4169	7.68831
																				-0.3295	7.11691	6.51275	-0.3295	7.44177	5.15556
																				-0.3285	10.355	10.2624	-0.3285	3.04803	6.76944
																				-0.3275	11.7338	13.6533	-0.3275	0.981247	11.4078
																				-0.3265	10.355	16.2228	-0.3265	0.246218	16.8397
																				-0.3255	7.11691	18.2	-0.3255	0.0484832	20.5943
																				-0.3245	3.80941	19.7027	-0.3245	0.00743514	21.8966
																				-0.3235	1.588	20.325	-0.3235	0.00743514	22.0374
																				-0.3225	0.515547	19.8101	-0.3225	0.0484832	22.092
																				-0.3215	0.130351	18.6382	-0.3215	0.246218	21.385
																				-0.3205	0.0256676	17.5759	-0.3205	0.973812	19.2542
																				-0.3195	0.00393625	16.9131	-0.3195	3.00699	17.0876
																				-0.3185	0	16.4259	-0.3185	7.24403	16.9258
																				-0.3175	0	15.7712	-0.3175	13.6967	18.4635
																				-0.3165	0	14.7865	-0.3165	20.5818	18.9308
																				-0.3155	0	13.8496	-0.3155	25.4096	16.2047
																				-0.3145	0	13.8901	-0.3145	27.7289	11.0446
																				-0.3135	0	15.3886	-0.3135	29.8857	5.93302
																				-0.3125	0	17.3947	-0.3125	33.9506	2.65563
																				-0.3115	0	18.0451	-0.3115	38.6065	1.59351
																				-0.3105	0	16.1339	-0.3105	40.0929	2.66171
																				-0.3095	0	12.0616	-0.3095	35.8606	5.9666
																				-0.3085	0	7.40252	-0.3085	26.852	11.2064
																				-0.3075	0	3.67621	-0.3075	16.6963	16.8
																				-0.3065	0	1.4606	-0.3065	9.14317	20.5882
																				-0.3055	0	0.460033	-0.3055	6.25276	21.8905
																				-0.3045	0	0.114144	-0.3045	8.26633	21.9977
																				-0.3035	0.00393625	0.0218175	-0.3035	13.9429	21.8905
																				-0.3025	0.0256676	0.00334581	-0.3025	20.5818	20.5882
																				-0.3015	0.130351	0	-0.3015	25.1708	16.8
																				-0.3005	0.515547	0	-0.3005	26.7625	11.2064
																				-0.2995	1.588	0	-0.2995	26.9346	5.97269
																				-0.2985	3.80941	0	-0.2985	27.0013	2.70138
																				-0.2975	7.11691	0	-0.2975	26.1372	1.79496
																				-0.2965	10.359	0	-0.2965	23.5329	3.45238
																				-0.2955	11.7634	0	-0.2955	20.8848	8.38111
																				-0.2945	10.5111	0	-0.2945	20.6945	16.8922
																				-0.2935	7.76281	0	-0.2935	22.615	27.0021
																				-0.2925	5.91689	0	-0.2925	23.3839	34.1434
																				-0.2915	7.01107	0	-0.2915	20.7796	34.1831
																				-0.2905	11.5762	0	-0.2905	16.4911	27.2432
																				-0.2895	18.1435	0	-0.2895	14.3985	17.8843
																				-0.2885	23.8329	0	-0.2885	16.4649	11.5924
																				-0.2875	26.4177	0	-0.2875	20.6788	11.5985
																				-0.2865	26.1769	0	-0.2865	23.1636	17.924
																				-0.2855	25.0947	0	-0.2855	22.6264	27.4569
																				-0.2845	24.2738	0	-0.2845	22.9416	35.0652
																				-0.2835	22.944	0	-0.2835	30.7298	37.0401
																				-0.2825	20.0122	0	-0.2825	49.3278	34.6904
																				-0.2815	15.9085	0	-0.2815	74.0435	33.6298
																				-0.2805	12.5439	0	-0.2805	93.6239	38.7749
																				-0.2795	11.4458	0	-0.2795	97.8461	50.0667
																				-0.2785	12.0734	0	-0.2785	84.6643	62.461
																				-0.2775	12.275	0	-0.2775	60.7057	69.3986
																				-0.2765	10.4893	0	-0.2765	35.8848	67.0724
																				-0.2755	7.14258	0	-0.2755	17.3125	56.4645
																				-0.2745	3.81334	0	-0.2745	6.73776	41.7042
																				-0.2735	1.588	0	-0.2735	2.10051	27.0003
																				-0.2725	0.515547	0	-0.2725	0.563225	15.0862
																				-0.2715	0.130351	0	-0.2715	0.35062	7.09301
																				-0.2705	0.0256676	0	-0.2705	1.03717	2.73497
																				-0.2695	0.0078725	0	-0.2695	3.24577	0.854673
																				-0.2685	0.0256676	0	-0.2685	8.16936	0.247203
																				-0.2675	0.130351	0	-0.2675	16.4426	0.247203
																				-0.2665	0.519484	0	-0.2665	26.7551	0.84859
																				-0.2655	1.61367	0	-0.2655	35.6069	2.6953
																				-0.2645	3.9437	0	-0.2645	39.1265	6.88547
																				-0.2635	7.65813	0	-0.2635	35.6554	14.2559
																				-0.2625	12.0734	0	-0.2625	27.0013	24.3844
																				-0.2615	16.0588	0	-0.2615	17.4164	35.2216
																				-0.2605	19.06	0	-0.2605	11.1763	43.8143
																				-0.2595	21.2814	0	-0.2595	10.4898	47.6697
																				-0.2585	22.6601	0	-0.2585	14.719	46.3147
																				-0.2575	22.2981	0	-0.2575	20.8355	42.0487
																				-0.2565	19.3663	0	-0.2565	25.4655	38.5945
																				-0.2555	14.2948	0	-0.2555	27.7848	38.4576
																				-0.2545	8.73451	0	-0.2545	30.1393	41.3312
																				-0.2535	4.35456	0	-0.2535	34.9729	44.2172
																				-0.2525	1.85264	0	-0.2525	41.8597	43.2329
																				-0.2515	1.08243	0	-0.2515	48.3107	37.1681
																				-0.2505	1.85264	0	-0.2505	52.5494	29.5243
																				-0.2495	4.35062	0	-0.2495	54.5809	25.6305
																				-0.2485	8.70884	0	-0.2485	55.3027	27.6353
																				-0.2475	14.1684	0	-0.2475	55.4578	33.1867
																				-0.2465	18.8764	0	-0.2465	55.2953	38.2967
																				-0.2455	20.8404	0	-0.2455	54.5324	40.2111
																				-0.2445	19.3663	0	-0.2445	52.3032	37.912
																				-0.2435	15.7525	0	-0.2435	47.3369	31.6268
																				-0.2425	12.5143	0	-0.2425	38.8601	22.8948
																				-0.2415	11.4419	0	-0.2415	27.7774	14.4909
																				-0.2405	12.0734	0	-0.2405	16.7037	9.37932
																				-0.2395	12.275	0	-0.2395	8.27376	9.34573
																				-0.2385	10.4893	0	-0.2385	3.54791	14.2955
																				-0.2375	7.14258	0	-0.2375	2.25719	22.1438
																				-0.2365	3.81334	0	-0.2365	4.32398	29.4137
																				-0.2355	1.588	0	-0.2355	10.7435	33.0108
																				-0.2345	0.515547	0	-0.2345	22.6421	32.3839
																				-0.2335	0.130351	0	-0.2335	39.2553	30.238
																				-0.2325	0.0256676	0	-0.2325	57.1368	30.3849
																				-0.2315	0.00393625	0	-0.2315	71.8627	33.9273
																				-0.2305	0	0	-0.2305	80.3395	37.7972
																				-0.2295	0	0	-0.2295	81.6551	38.2643
																				-0.2285	0	0	-0.2285	77.043	35.7586
																				-0.2275	0	0	-0.2275	69.4734	34.6605
																				-0.2265	0	0	-0.2265	61.9742	38.0846
																				-0.2255	0	0	-0.2255	55.5974	44.4752
																				-0.2245	0	0	-0.2245	49.3404	50.1821
																				-0.2235	0	0	-0.2235	42.3595	54.0421
																				-0.2225	0	0	-0.2225	36.0511	57.8454
																				-0.2215	0	0	-0.2215	33.441	62.3975
																				-0.2205	0	0	-0.2205	36.2004	64.6315
																				-0.2195	0	0	-0.2195	42.8894	60.1611
																				-0.2185	0	0	-0.2185	50.6312	48.9913
																				-0.2175	0	0	-0.2175	57.7192	37.2704
																				-0.2165	0	0	-0.2165	63.7795	32.1191
																				-0.2155	0	0	-0.2155	68.3685	35.2072
																				-0.2145	0	0	-0.2145	70.5388	41.8653
																				-0.2135	0	0	-0.2135	69.2994	45.7924
																				-0.2125	0	0	-0.2125	63.6305	43.973
																				-0.2115	0	0	-0.2115	53.1459	37.9291
																				-0.2105	0	0	-0.2105	40.024	32.0269
																				-0.2095	0	0	-0.2095	29.0691	30.9538
																				-0.2085	0	0	-0.2085	23.9813	37.1174
																				-0.2075	0	0	-0.2075	23.835	48.7204
																				-0.2065	0	0	-0.2065	24.3651	59.8969
																				-0.2055	0	0	-0.2055	22.8612	63.725
																				-0.2045	0	0	-0.2045	20.743	57.1054
																				-0.2035	0	0	-0.2035	20.8923	43.9136
																				-0.2025	0.00393625	0	-0.2025	23.5403	32.7084
																				-0.2015	0.0256676	0	-0.2015	26.1857	30.3374
																				-0.2005	0.130351	0	-0.2005	27.2475	36.9828
																				-0.1995	0.515547	0	-0.1995	27.9084	46.3816
																				-0.1985	1.588	0	-0.1985	29.7695	50.635
																				-0.1975	3.80941	0	-0.1975	32.4074	46.0641
																				-0.1965	7.11691	0.00334581	-0.1965	34.2226	35.7647
																				-0.1955	10.355	0.0218175	-0.1955	34.23	26.9004
																				-0.1945	11.7338	0.110798	-0.1945	32.4559	25.4544
																				-0.1935	10.355	0.438215	-0.1935	30.0083	32.8633
																				-0.1925	7.11691	1.3498	-0.1925	28.8337	46.2795
																				-0.1915	3.80941	3.238	-0.1915	30.0083	60.8282
																				-0.1905	1.59193	6.04937	-0.1905	32.4559	71.7646
																				-0.1895	0.541215	8.80179	-0.1895	34.23	75.7997
																				-0.1885	0.260702	9.97373	-0.1885	34.2375	71.7586
																				-0.1875	0.541215	8.80179	-0.1875	32.5118	60.7947
																				-0.1865	1.59193	6.04937	-0.1865	30.303	46.1177
																				-0.1855	3.80941	3.238	-0.1855	30.0612	32.268
																				-0.1845	7.11691	1.3498	-0.1845	34.0227	23.797
																				-0.1835	10.355	0.438215	-0.1835	42.8487	23.4734
																				-0.1825	11.7338	0.110798	-0.1825	55.5962	30.6867
																				-0.1815	10.359	0.0218175	-0.1815	69.2584	41.2093
																				-0.1805	7.14258	0.00669163	-0.1805	78.3827	49.0201
																				-0.1795	3.93976	0.0218175	-0.1795	78.0276	49.7608
																				-0.1785	2.10354	0.110798	-0.1785	68.199	43.7871
																				-0.1775	2.10354	0.438215	-0.1775	54.2176	35.4508
																				-0.1765	3.93976	1.3498	-0.1765	42.9978	28.5806
																				-0.1755	7.14258	3.238	-0.1755	39.0437	23.2835
																				-0.1745	10.359	6.04937	-0.1745	41.7129	17.8379
																				-0.1735	11.7338	8.80179	-0.1735	45.3123	12.2046
																				-0.1725	10.355	9.97373	-0.1725	43.7344	8.42078
																				-0.1715	7.11691	8.80179	-0.1715	36.2558	8.35361
																				-0.1705	3.80941	6.04937	-0.1705	27.8826	11.7956
																				-0.1695	1.588	3.238	-0.1695	23.6456	16.2047
																				-0.1685	0.515547	1.3498	-0.1685	23.5329	18.1798
																				-0.1675	0.130351	0.438215	-0.1675	23.3839	16.049
																				-0.1665	0.0256676	0.110798	-0.1665	19.8542	11.2003
																				-0.1655	0.00393625	0.0218175	-0.1655	13.499	6.68402
																				-0.1645	0	0.00669163	-0.1645	7.20298	4.90836
																				-0.1635	0	0.0218175	-0.1635	2.99955	6.69011
																				-0.1625	0	0.110798	-0.1625	0.973812	11.24
																				-0.1615	0	0.441561	-0.1615	0.246218	16.2444
																				-0.1605	0	1.37162	-0.1605	0.0484832	18.9369
																				-0.1595	0	3.34879	-0.1595	0.00743514	18.4574
																				-0.1585	0	6.48759	-0.1585	0	16.8861
																				-0.1575	0	10.1516	-0.1575	0.00743514	16.8861
																				-0.1565	0	13.2117	-0.1565	0.0484832	18.4574
																				-0.1555	0	14.8545	-0.1555	0.246218	18.9308
																				-0.1545	0	14.873	-0.1545	0.973812	16.2047
																				-0.1535	0	13.3225	-0.1535	3.00699	11.0385
																				-0.1525	0	10.5898	-0.1525	7.24403	5.89335
																				-0.1515	0	7.83739	-0.1515	13.6967	2.45418
																				-0.1505	0	6.58679	-0.1505	20.5818	0.796755
																				-0.1495	0	7.42099	-0.1495	25.4096	0.207534
																				-0.1485	0	9.24335	-0.1485	27.7289	0.0793362
																				-0.1475	0	10.0845	-0.1475	29.8857	0.207534
																				-0.1465	0	8.82361	-0.1465	33.9506	0.796755
																				-0.1455	0	6.05272	-0.1455	38.6139	2.46026
																				-0.1445	0	3.238	-0.1445	40.1414	5.93302
																				-0.1435	0	1.3498	-0.1435	36.0993	11.24
																				-0.1425	0	0.438215	-0.1425	27.7848	17.0015
																				-0.1415	0	0.110798	-0.1415	19.4981	21.385
																				-0.1405	0	0.0218175	-0.1405	15.6111	24.3508
																				-0.1395	0	0.00334581	-0.1395	17.6626	27.9307
																				-0.1385	0	0	-0.1385	23.5814	33.1305
																				-0.1375	0	0	-0.1375	29.6131	37.5897
																				-0.1365	0	0	-0.1365	33.0511	38.1911
																				-0.1355	0	0	-0.1355	33.01	35.5908
																				-0.1345	0	0	-0.1345	29.3668	34.0652
																				-0.1335	0	0	-0.1335	22.615	36.4272
																				-0.1325	0	0	-0.1325	14.7116	41.0482
																				-0.1315	0	0	-0.1315	8.6618	45.1101
																				-0.1305	0	0	-0.1305	7.0214	49.2392
																				-0.1295	0	0	-0.1295	11.1838	56.5053
																				-0.1285	0.00393625	0	-0.1285	20.9333	66.9367
																				-0.1275	0.0256676	0	-0.1275	33.2973	75.282
																				-0.1265	0.130351	0	-0.1265	42.7046	75.2673
																				-0.1255	0.515547	0	-0.1255	44.7229	65.137
																				-0.1245	1.588	0.00334581	-0.1245	40.1981	48.5251
																				-0.1235	3.80941	0.0218175	-0.1235	34.0817	31.0745
																				-0.1225	7.11691	0.110798	-0.1225	29.7546	17.113
																				-0.1215	10.355	0.438215	-0.1215	26.1446	8.5644
																				-0.1205	11.7338	1.3498	-0.1205	20.828	5.59813
																				-0.1195	10.355	3.238	-0.1195	13.984	7.76765
																				-0.1185	7.11691	6.04937	-0.1185	8.23271	14.4695
																				-0.1175	3.80941	8.80179	-0.1175	6.06246	24.4301
																				-0.1165	1.588	9.97373	-0.1165	8.46406	35.2674
																				-0.1155	0.515547	8.80179	-0.1155	14.9167	44.0036
																				-0.1145	0.130351	6.04937	-0.1145	23.6299	48.3871
																				-0.1135	0.0256676	3.238	-0.1135	32.6126	48.3721
																				-0.1125	0.00393625	1.3498	-0.1125	41.1794	46.3882
																				-0.1115	0	0.438215	-0.1115	49.4937	44.9261
																				-0.1105	0	0.110798	-0.1105	56.3681	43.6784
																				-0.1095	0	0.0218175	-0.1095	59.1883	40.6849
																				-0.1085	0	0.00334581	-0.1085	56.7891	36.3875
																				-0.1075	0	0	-0.1075	51.2665	34.2148
																				-0.1065	0	0	-0.1065	46.4919	36.1861
																				-0.1055	0	0	-0.1055	45.1527	39.8485
																				-0.1045	0	0.00334581	-0.1045	47.0295	41.0289
																				-0.1035	0	0.0218175	-0.1035	49.6573	38.2818
																				-0.1025	0	0.114144	-0.1025	50.3333	33.1366
																				-0.1015	0	0.460033	-0.1015	47.598	27.2844
																				-0.1005	0	1.4606	-0.1005	41.9492	21.748
																				-0.0995	0	3.67621	-0.0995	36.1519	18.0919
																				-0.0985	0	7.39917	-0.0985	34.1052	17.9637
																				-0.0975	0	12.0398	-0.0975	37.9725	21.1649
																				-0.0965	0	16.0231	-0.0965	46.0631	25.6606
																				-0.0955	0	17.6036	-0.0955	53.6329	29.8653
																				-0.0945	0	16.0231	-0.0945	55.6663	33.7655
																				-0.0935	0	12.0398	-0.0935	49.9487	37.688
																				-0.0925	0	7.39917	-0.0925	39.0576	41.1905
																				-0.0915	0.00393625	3.67621	-0.0915	29.0542	43.6238
																				-0.0905	0.0256676	1.4606	-0.0905	24.8582	44.9807
																				-0.0895	0.130351	0.460033	-0.0895	26.5809	45.8766
																				-0.0885	0.515547	0.114144	-0.0885	30.5869	47.0502
																				-0.0875	1.588	0.0218175	-0.0875	33.2973	48.754
																				-0.0865	3.80941	0.00334581	-0.0865	33.0585	50.132
																				-0.0855	7.11691	0	-0.0855	29.3668	49.3975
																				-0.0845	10.355	0	-0.0845	22.5591	45.809
																				-0.0835	11.7338	0	-0.0835	14.4169	41.6581
																				-0.0825	10.355	0.00334581	-0.0825	7.44177	40.636
																				-0.0815	7.11691	0.0218175	-0.0815	3.04803	43.614
																				-0.0805	3.80941	0.110798	-0.0805	0.988682	47.8423
																				-0.0795	1.588	0.438215	-0.0795	0.294701	51.4179
																				-0.0785	0.515547	1.3498	-0.0785	0.294701	56.145
																				-0.0775	0.130351	3.238	-0.0775	0.981247	63.9613
																				-0.0765	0.0256676	6.04937	-0.0765	2.99955	72.2577
																				-0.0755	0.00393625	8.80179	-0.0755	7.19555	75.7389
																				-0.0745	0	9.97708	-0.0745	13.4431	72.7796
																				-0.0735	0	8.82361	-0.0735	19.567	67.4406
																				-0.0725	0.00393625	6.16017	-0.0725	22.2123	64.3826
																				-0.0715	0.0256676	3.67956	-0.0715	19.8206	63.7051
																				-0.0705	0.130351	2.72141	-0.0705	14.5138	61.4782
																				-0.0695	0.515547	3.78701	-0.0695	10.695	53.9722
																				-0.0685	1.588	6.59839	-0.0685	12.1912	41.3034
																				-0.0675	3.81334	10.1734	-0.0675	20.6622	27.9286
																				-0.0665	7.14258	13.2151	-0.0665	35.1707	19.4964
																				-0.0655	10.4854	14.8545	-0.0655	52.098	18.804
																				-0.0645	12.2494	14.873	-0.0645	65.889	24.3265
																				-0.0635	11.943	13.3225	-0.0635	71.2623	31.9961
																				-0.0625	10.9263	10.5931	-0.0625	66.1204	37.9731
																				-0.0615	10.9263	7.85921	-0.0615	53.0233	40.144
																				-0.0605	11.943	6.70094	-0.0605	37.9314	37.8999
																				-0.0595	12.2494	7.88102	-0.0595	26.9324	31.6268
																				-0.0585	10.4854	10.7039	-0.0585	22.8809	22.8948
																				-0.0575	7.14258	13.7607	-0.0575	24.0328	14.5031
																				-0.0565	3.81334	16.2228	-0.0565	26.2342	9.45866
																				-0.0555	1.588	18.0925	-0.0555	27.0162	9.75472
																				-0.0545	0.515547	19.2611	-0.0545	26.942	15.9226
																				-0.0535	0.130351	18.9567	-0.0535	26.811	27.22
																				-0.0525	0.0256676	16.4831	-0.0525	25.4096	41.8232
																				-0.0515	0.00393625	12.2647	-0.0515	21.5072	56.8674
																				-0.0505	0	7.88102	-0.0505	16.6888	68.6202
																				-0.0495	0	5.14015	-0.0495	14.447	74.0659
																				-0.0485	0	5.13681	-0.0485	16.506	73.2373
																				-0.0475	0	7.85921	-0.0475	20.828	68.8135
																				-0.0465	0	12.1539	-0.0465	23.6301	62.4399
																				-0.0455	0	16.0449	-0.0455	23.5814	53.0118
																				-0.0445	0	17.6069	-0.0445	23.6456	39.6948
																				-0.0435	0	16.0265	-0.0435	27.8342	24.8945
																				-0.0425	0	12.0616	-0.0425	36.0096	12.6567
																				-0.0415	0	7.50997	-0.0415	42.7457	5.12806
																				-0.0405	0	4.11443	-0.0405	42.2158	1.67893
																				-0.0395	0	2.81039	-0.0395	34.0323	0.650105
																				-0.0385	0	3.70138	-0.0385	23.6941	1.08363
																				-0.0375	0	6.18534	-0.0375	17.6369	3.30277
																				-0.0365	0	8.9344	-0.0365	18.3902	8.5429
																				-0.0355	0	10.4153	-0.0355	23.7791	17.6829
																				-0.0345	0	10.1549	-0.0345	29.6541	29.4624
																				-0.0335	0	9.30919	-0.0335	33.0585	40.0703
																				-0.0325	0	9.39817	-0.0325	33.01	45.3773
																				-0.0315	0	10.5898	-0.0315	29.3594	44.0036
																				-0.0305	0	11.7651	-0.0305	22.5591	38.2711
																				-0.0295	0	12.1724	-0.0295	14.4169	32.6861
																				-0.0285	0	12.2314	-0.0285	7.4492	31.1359
																				-0.0275	0	12.4813	-0.0275	3.09652	33.8937
																				-0.0265	0	12.6767	-0.0265	1.22746	36.8723
																				-0.0255	0	12.4998	-0.0255	1.22746	35.1934
																				-0.0245	0	12.327	-0.0245	3.09652	28.0918
																				-0.0235	0	12.5435	-0.0235	7.4492	19.8286
																				-0.0225	0	12.9016	-0.0225	14.4169	16.0694
																				-0.0215	0	13.3762	-0.0215	22.5591	20.1624
																				-0.0205	0	15.0199	-0.0205	29.3594	32.0666
																				-0.0195	0	18.9758	-0.0195	33.0026	48.9158
																				-0.0185	0	24.7754	-0.0185	33.0026	65.7566
																				-0.0175	0	30.0816	-0.0175	29.3594	76.8484
																				-0.0165	0	32.157	-0.0165	22.5591	78.5288
																				-0.0155	0	29.6652	-0.0155	14.4243	72.018
																				-0.0145	0	23.4256	-0.0145	7.49025	63.1467
																				-0.0135	0	15.716	-0.0135	3.29425	58.6343
																				-0.0125	0	8.86311	-0.0125	1.95506	61.6758
																				-0.0115	0	4.16141	-0.0115	3.24577	69.5937
																				-0.0105	0	1.70736	-0.0105	7.24403	75.8182
																				-0.0095	0	1.03086	-0.0095	13.4579	75.8587
																				-0.0085	0	1.9055	-0.0085	19.608	71.3135
																				-0.0075	0.00393625	4.60961	-0.0075	22.4101	66.7741
																				-0.0065	0.0256676	9.29072	-0.0065	20.5408	63.6227
																				-0.0055	0.130351	14.8512	-0.0055	16.4911	58.8667
																				-0.0045	0.515547	18.7755	-0.0045	14.6373	50.0018
																				-0.0035	1.588	18.7755	-0.0035	17.4164	39.5957
																				-0.0025	3.80941	14.8512	-0.0025	23.5403	34.2374
																				-0.0015	7.11691	9.28737	-0.0015	29.6541	38.8975
																				-0.0005	10.355	4.58779	-0.0005	33.2973	52.3704
																				0.0005	11.7338	1.78801	0.0005	33.9838	68.3347
																				0.0015	10.355	0.549013	0.0015	32.3589	80.7269
																				0.0025	7.11691	0.132616	0.0025	29.7546	86.9394
																				0.0035	3.80941	0.0251633	0.0035	27.8599	86.0558
																				0.0045	1.588	0.00334581	0.0045	27.0013	76.9791
																				0.0055	0.515547	0	0.0055	25.2119	60.3842
																				0.0065	0.130351	0	0.0065	20.5408	40.7731
																				0.0075	0.0256676	0	0.0075	13.6967	24.5295
																				0.0085	0.00393625	0	0.0085	7.29251	15.8923
																				0.0095	0	0	0.0095	3.2532	14.7839
																				0.0105	0	0	0.0105	1.94762	17.737
																				0.0115	0	0	0.0115	3.24577	21.0645
																				0.0125	0	0	0.0125	7.24403	24.6569
																				0.0135	0	0	0.0135	13.4505	32.9616
																				0.0145	0	0	0.0145	19.5595	50.7174
																				0.0155	0	0.00334581	0.0155	22.1638	76.7019
																				0.0165	0	0.0218175	0.0165	19.5595	102.424
																				0.0175	0	0.110798	0.0175	13.4431	118.147
																				0.0185	0	0.438215	0.0185	7.19555	120.071
																				0.0195	0	1.35314	0.0195	2.99955	111.942
																				0.0205	0	3.25981	0.0205	0.981247	101.369
																				0.0215	0	6.16017	0.0215	0.294701	95.3908
																				0.0225	0	9.24335	0.0225	0.294701	97.4038
																				0.0235	0	11.3453	0.0235	0.981247	106.561
																				0.0245	0	12.1506	0.0245	2.99955	120.161
																				0.0255	0	12.5403	0.0255	7.19555	136.994
																				0.0265	0	13.4114	0.0265	13.4431	157.126
																				0.0275	0	14.6723	0.0275	19.5595	178.133
																				0.0285	0	15.7276	0.0285	22.1713	193.615
																				0.0295	0	16.3118	0.0295	19.608	197.934
																				0.0305	0	16.4715	0.0305	13.6893	192.662
																				0.0315	0	16.2077	0.0315	8.16936	185.803
																				0.0325	0	15.3112	0.0325	5.9991	183.334
																				0.0335	0	13.4333	0.0335	8.16936	183.596
																				0.0345	0	10.615	0.0345	13.6967	180.894
																				0.0355	0	7.86255	0.0355	19.6565	171.993
																				0.0365	0	6.69759	0.0365	22.4175	158.298
																				0.0375	0	7.86255	0.0375	20.5333	144.644
																				0.0385	0	10.615	0.0385	16.4426	136.671
																				0.0395	0	13.4333	0.0395	14.3911	137.418
																				0.0405	0	15.3112	0.0405	16.45	144.634
																				0.0415	0	16.2043	0.0415	20.5818	151.21
																				0.0425	0	16.4497	0.0425	22.6563	148.876
																				0.0435	0	16.201	0.0435	20.5818	133.739
																				0.0445	0	15.2894	0.0445	16.4575	110.194
																				0.0455	0	13.3225	0.0455	14.4396	89.1988
																				0.0465	0	10.1734	0.0465	16.7037	80.2444
																				0.0475	0	6.49094	0.0475	21.6041	84.0472
																				0.0485	0	3.34879	0.0485	25.9021	93.8545
																				0.0495	0	1.37162	0.0495	28.7512	102.773
																				0.0505	0	0.441561	0.0505	32.9001	107.759
																				0.0515	0	0.110798	0.0515	41.1947	108.535
																				0.0525	0	0.0218175	0.0525	52.2957	107.304
																				0.0535	0	0.00334581	0.0535	60.6262	109.184
																				0.0545	0	0	0.0545	61.024	118.153
																				0.0555	0	0	0.0555	53.6146	131.899
																				0.0565	0	0	0.0565	43.6309	143.48
																				0.0575	0	0	0.0575	36.1519	148.378
																				0.0585	0	0	0.0585	32.4385	148.094
																				0.0595	0	0	0.0595	32.0529	147.147
																				0.0605	0	0	0.0605	35.85	148.079
																				0.0615	0	0	0.0615	44.5147	149.719
																				0.0625	0	0	0.0625	55.9067	149.593
																				0.0635	0	0	0.0635	66.3353	147.43
																				0.0645	0	0	0.0645	73.4469	145.377
																				0.0655	0	0	0.0655	75.8535	144.889
																				0.0665	0	0	0.0665	71.4854	145.247
																				0.0675	0	0	0.0675	59.1398	145.428
																				0.0685	0	0	0.0685	41.4182	145.714
																				0.0695	0	0	0.0695	23.9329	146.899
																				0.0705	0	0	0.0705	11.2323	148.73
																				0.0715	0	0	0.0715	4.2755	148.758
																				0.0725	0	0	0.0725	1.51473	142.874
																				0.0735	0	0	0.0735	1.28338	129.111
																				0.0745	0.00393625	0	0.0745	3.10395	111.22
																				0.0755	0.0256676	0	0.0755	7.45664	96.4791
																				0.0765	0.130351	0	0.0765	14.4653	89.8987
																				0.0775	0.515547	0	0.0775	22.8053	91.6478
																				0.0785	1.588	0	0.0785	30.3332	98.4503
																				0.0795	3.80941	0	0.0795	36.0021	105.826
																				0.0805	7.11691	0	0.0805	40.1981	110.312
																				0.0815	10.355	0	0.0815	42.8025	111.182
																				0.0825	11.7338	0	0.0825	42.1186	110.301
																				0.0835	10.355	0	0.0835	36.5807	110.392
																				0.0845	7.11691	0	0.0845	27.0087	113.513
																				0.0855	3.80941	0	0.0855	16.547	120.314
																				0.0865	1.588	0	0.0865	8.4715	129.836
																				0.0875	0.515547	0	0.0875	4.4658	139.433
																				0.0885	0.130351	0	0.0885	5.00309	145.632
																				0.0895	0.0256676	0	0.0895	10.4972	146.036
																				0.0905	0.00393625	0	0.0905	20.9333	140.89
																				0.0915	0	0	0.0915	33.9838	132.633
																				0.0925	0	0	0.0925	44.7229	123.62
																				0.0935	0	0	0.0935	48.9189	114.573
																				0.0945	0	0	0.0945	46.4605	106.198
																				0.0955	0	0	0.0955	40.2951	101.539
																				0.0965	0	0	0.0965	32.8514	104.721
																				0.0975	0	0.00334581	0.0975	25.4805	116.945
																				0.0985	0	0.0218175	0.0985	20.6622	134.667
																				0.0995	0	0.110798	0.0995	21.8813	151.539
																				0.1005	0	0.438215	0.1005	29.9416	161.886
																				0.1015	0	1.3498	0.1015	40.1003	163.414
																				0.1025	0	3.238	0.1025	44.5739	157.301
																				0.1035	0	6.04937	0.1035	39.1675	145.204
																				0.1045	0	8.80179	0.1045	26.9084	127.146
																				0.1055	0	9.97373	0.1055	14.4881	103.65
																				0.1065	0	8.80179	0.1065	6.49154	79.3472
																				0.1075	0	6.04937	0.1075	3.89525	62.6938
																				0.1085	0	3.238	0.1085	6.49154	60.9665
																				0.1095	0	1.3498	0.1095	14.4881	74.5122
																				0.1105	0	0.438215	0.1105	26.901	96.3398
																				0.1115	0	0.110798	0.1115	39.1191	118.381
																				0.1125	0	0.0251633	0.1125	44.3277	137.18
																				0.1135	0	0.0251633	0.1135	39.1191	151.867
																				0.1145	0.00393625	0.110798	0.1145	26.8861	159.929
																				0.1155	0.0256676	0.438215	0.1155	14.3911	159.861
																				0.1165	0.130351	1.3498	0.1165	5.9991	155.814
																				0.1175	0.519484	3.238	0.1175	1.94762	154.25
																				0.1185	1.61367	6.04937	0.1185	0.492436	156.602
																				0.1195	3.93976	8.80179	0.1195	0.104402	158.216
																				0.1205	7.63246	9.97373	0.1205	0.0633535	153.566
																				0.1215	11.943	8.80513	0.1215	0.246218	141.323
																				0.1225	15.5432	6.07119	0.1225	0.973812	125.642
																				0.1235	17.4759	3.34879	0.1235	2.99955	112.334
																				0.1245	17.4976	1.78801	0.1245	7.19555	103.013
																				0.1255	15.6736	1.78801	0.1255	13.4505	94.5877
																				0.1265	12.4586	3.34879	0.1265	19.608	85.5533
																				0.1275	9.22046	6.07119	0.1275	22.4175	80.0088
																				0.1285	7.74917	8.80513	0.1285	20.5818	83.4668
																				0.1295	8.73058	9.97373	0.1295	16.6888	96.3216
																				0.1305	10.8785	8.80179	0.1305	15.3649	113.218
																				0.1315	11.8898	6.04937	0.1315	19.4422	127.362
																				0.1325	10.5111	3.238	0.1325	27.7289	134.728
																				0.1335	7.63639	1.3498	0.1335	35.8606	135.984
																				0.1345	5.39741	0.438215	0.1345	39.216	134.825
																				0.1355	5.39741	0.110798	0.1355	35.8606	132.981
																				0.1365	7.63639	0.0218175	0.1365	27.7289	127.856
																				0.1375	10.5111	0.00334581	0.1375	19.4496	116.788
																				0.1385	11.8898	0	0.1385	15.4134	101.829
																				0.1395	10.8745	0	0.1395	16.935	88.0216
																				0.1405	8.70491	0	0.1405	21.5556	78.7591
																				0.1415	7.62275	0	0.1415	25.4245	75.2138
																				0.1425	8.73058	0	0.1425	26.8669	78.4258
																				0.1435	11.0009	0	0.1435	27.2367	88.6351
																				0.1445	12.3836	0	0.1445	28.2288	102.451
																				0.1455	11.9944	0.00334581	0.1455	30.1739	112.67
																				0.1465	11.0606	0.0218175	0.1465	34.0786	112.414
																				0.1475	11.4419	0.110798	0.1475	43.0382	100.43
																				0.1485	13.531	0.438215	0.1485	58.8831	82.7512
																				0.1495	16.0588	1.3498	0.1495	78.4584	68.296
																				0.1505	17.6023	3.238	0.1505	95.6947	62.8805
																				0.1515	17.4976	6.04937	0.1515	106.45	67.9214
																				0.1525	15.5471	8.80179	0.1525	108.864	82.184
																				0.1535	11.947	9.97373	0.1535	100.893	100.734
																				0.1545	7.65813	8.80179	0.1545	81.9525	113.904
																				0.1555	4.07011	6.04937	0.1555	56.8573	112.653
																				0.1565	2.13315	3.238	0.1565	34.6204	96.1385
																				0.1575	2.13315	1.3498	0.1575	22.4422	72.217
																				0.1585	4.07405	0.438215	0.1585	21.6509	51.2947
																				0.1595	7.68379	0.110798	0.1595	28.2698	40.2224
																				0.1605	12.0773	0.0218175	0.1605	35.965	39.446
																				0.1615	16.0588	0.00334581	0.1615	39.2383	43.8828
																				0.1625	19.06	0	0.1625	35.909	47.2545
																				0.1635	21.2814	0	0.1635	27.9751	46.824
																				0.1645	22.6601	0	0.1645	20.416	44.8146
																				0.1655	22.2981	0	0.1655	18.3719	46.1454
																				0.1665	19.3663	0	0.1665	23.9329	54.8679
																				0.1675	14.2948	0	0.1675	34.2711	71.3257
																				0.1685	8.73451	0	0.1685	42.9508	91.6933
																				0.1695	4.35456	0	0.1695	44.7714	110.614
																				0.1705	1.8487	0	0.1705	40.2056	125.157
																				0.1715	1.05676	0	0.1715	34.0891	135.953
																				0.1725	1.72228	0	0.1725	29.8031	143.895
																				0.1735	3.83508	0	0.1735	26.3909	147.626
																				0.1745	7.12478	0	0.1745	21.8093	146.468
																				0.1755	10.3846	0	0.1755	17.0394	143.241
																				0.1765	11.8898	0	0.1765	15.7155	141.196
																				0.1775	11.0009	0	0.1775	20.6696	140.664
																				0.1785	9.22046	0	0.1785	31.7023	140.948
																				0.1795	9.20681	0	0.1795	46.0482	142.256
																				0.1805	12.5143	0	0.1805	59.8061	143.211
																				0.1815	17.9875	0	0.1815	68.6169	139.232
																				0.1825	22.2192	0	0.1825	68.4785	126.82
																				0.1835	22.1145	0	0.1835	58.166	108.148
																				0.1845	17.4759	0	0.1845	41.1719	88.5075
																				0.1855	10.9263	0	0.1855	23.8844	70.3613
																				0.1865	5.39741	0	0.1865	11.2174	52.6881
																				0.1875	2.10354	0	0.1875	4.22702	35.133
																				0.1885	0.645898	0	0.1885	1.26851	19.8744
																				0.1895	0.156018	0	0.1895	0.302136	9.27545
																				0.1905	0.0296038	0	0.1905	0.0559184	3.67209
																				0.1915	0.0078725	0	0.1915	0.00743514	1.88038
																				0.1925	0.0256676	0	0.1925	0	2.9425
																				0.1935	0.130351	0	0.1935	0	6.93122
																				0.1945	0.519484	0	0.1945	0	14.2559
																				0.1955	1.61367	0	0.1955	0	24.3447
																				0.1965	3.93976	0	0.1965	0	35.0263
																				0.1975	7.63246	0	0.1975	0	43.0511
																				0.1985	11.943	0	0.1985	0	45.3834
																				0.1995	15.5432	0	0.1995	0	41.0625
																				0.2005	17.4759	0	0.2005	0	32.9148
																				0.2015	17.4976	0	0.2015	0	26.8608
																				0.2025	15.6736	0	0.2025	0	28.0907
																				0.2035	12.4586	0	0.2035	0	37.0164
																				0.2045	9.22046	0	0.2045	0	48.7961
																				0.2055	7.74917	0	0.2055	0	57.0657
																				0.2065	8.73058	0	0.2065	0	58.635
																				0.2075	10.8745	0	0.2075	0	54.786
																				0.2085	11.8642	0	0.2085	0	48.4793
																				0.2095	10.3807	0	0.2095	0	41.1844
																				0.2105	7.12085	0	0.2105	0	32.7928
																				0.2115	3.80941	0	0.2115	0	23.7648
																				0.2125	1.588	0	0.2125	0	16.3559
																				0.2135	0.519484	0	0.2135	0	13.4138
																				0.2145	0.156018	0	0.2145	0	16.1148
																				0.2155	0.156018	0.00334581	0.2155	0	22.7269
																				0.2165	0.519484	0.0218175	0.2165	0	29.3405
																				0.2175	1.588	0.110798	0.2175	0	32.0462
																				0.2185	3.80941	0.438215	0.2185	0	29.139
																				0.2195	7.11691	1.3498	0.2195	0	21.8905
																				0.2205	10.355	3.238	0.2205	0	13.453
																				0.2215	11.7338	6.05272	0.2215	0	6.68402
																				0.2225	10.355	8.82361	0.2225	0	2.65563
																				0.2235	7.11691	10.0845	0.2235	0	0.836423
																				0.2245	3.80941	9.24	0.2245	0	0.207534
																				0.2255	1.588	7.39917	0.2255	0	0.0396681
																				0.2265	0.515547	6.47599	0.2265	0	0.0060833
																				0.2275	0.130351	7.39917	0.2275	0	0
																				0.2285	0.0256676	9.24	0.2285	0	0
																				0.2295	0.00393625	10.0845	0.2295	0	0
																				0.2305	0	8.82361	0.2305	0	0
																				0.2315	0	6.05272	0.2315	0	0.0060833
																				0.2325	0	3.238	0.2325	0	0.0396681
																				0.2335	0	1.3498	0.2335	0	0.201451
																				0.2345	0	0.438215	0.2345	0	0.796755
																				0.2355	0	0.110798	0.2355	0	2.46026
																				0.2365	0	0.0218175	0.2365	0.0148703	5.92694
																				0.2375	0	0.00334581	0.2375	0.0969664	11.2003
																				0.2385	0	0	0.2385	0.492436	16.8
																				0.2395	0	0	0.2395	1.94762	20.5882
																				0.2405	0	0	0.2405	6.00654	21.9027
																				0.2415	0	0	0.2415	14.447	22.0771
																				0.2425	0	0	0.2425	27.1808	22.2934
																				0.2435	0	0	0.2435	40.3391	22.1817
																				0.2445	0	0	0.2445	48.3085	21.7084
																				0.2455	0	0	0.2455	49.3626	22.9748
																				0.2465	0	0	0.2465	47.7784	27.9307
																				0.2475	0	0	0.2475	48.4308	34.5064
																				0.2485	0.00393625	0	0.2485	51.0652	37.2724
																				0.2495	0.0256676	0	0.2495	52.3328	33.0444
																				0.2505	0.130351	0	0.2505	51.8852	24.6991
																				0.2515	0.515547	0	0.2515	53.4897	18.5165
																				0.2525	1.588	0	0.2525	60.208	18.6604
																				0.2535	3.81334	0	0.2535	69.9785	24.8088
																				0.2545	7.14258	0	0.2545	75.946	34.2397
																				0.2555	10.4854	0	0.2555	71.3849	45.5586
																				0.2565	12.2494	0	0.2565	55.6661	60.5264
																				0.2575	11.943	0	0.2575	35.3166	81.8482
																				0.2585	10.9303	0	0.2585	18.6592	108.424
																				0.2595	10.952	0	0.2595	10.2672	133.191
																				0.2605	12.0773	0	0.2605	10.3855	147.202
																				0.2615	12.7906	0	0.2615	17.0879	146.218
																				0.2625	12.2037	0	0.2625	27.4004	132.658
																				0.2635	11.4675	0	0.2635	37.8156	111.908
																				0.2645	12.5222	0	0.2645	46.0994	88.8039
																				0.2655	15.7781	0	0.2655	53.046	67.9183
																				0.2665	19.5005	0	0.2665	61.083	55.4033
																				0.2675	21.3817	0	0.2675	69.9785	57.4933
																				0.2685	20.5947	0	0.2685	75.0636	74.9486
																				0.2695	18.4973	0	0.2695	71.7876	99.2544
																				0.2705	17.4355	0	0.2705	61.2542	117.292
																				0.2715	18.6198	0.00334581	0.2715	49.1136	121.5
																				0.2725	21.0885	0.0218175	0.2725	40.3542	114.127
																				0.2735	22.865	0.110798	0.2735	37.7237	101.262
																				0.2745	22.9248	0.438215	0.2745	42.8404	85.8869
																				0.2755	21.8226	1.35314	0.2755	54.4768	68.6002
																				0.2765	20.6519	3.25981	0.2765	66.2934	52.3374
																				0.2775	19.8682	6.16017	0.2775	70.875	42.416
																				0.2785	19.1903	9.24	0.2785	67.2479	41.4759
																				0.2795	18.0132	11.3235	0.2795	61.2625	46.6119
																				0.2805	15.6814	12.0398	0.2805	57.491	52.2749
																				0.2815	11.9944	12.0987	0.2815	54.3002	54.4865
																				0.2825	7.76675	12.0398	0.2825	48.5159	51.8964
																				0.2835	4.45531	11.3235	0.2835	40.926	45.0977
																				0.2845	3.20166	9.24	0.2845	34.3572	36.9522
																				0.2855	4.32889	6.16017	0.2855	29.4463	32.116
																				0.2865	7.2512	3.25981	0.2865	25.7267	34.6497
																				0.2875	10.4103	1.35314	0.2875	25.1044	46.0177
																				0.2885	11.8938	0.438215	0.2885	30.9307	64.4554
																				0.2895	11.0009	0.114144	0.2895	43.2126	84.3912
																				0.2905	9.22833	0.0436349	0.2905	56.1402	97.8156
																				0.2915	9.25815	0.114144	0.2915	61.5366	99.4084
																				0.2925	12.775	0.438215	0.2925	55.2634	90.1695
																				0.2935	19.0225	1.3498	0.2935	40.4592	74.9015
																				0.2945	25.4209	3.238	0.2945	24.6604	58.3228
																				0.2955	29.8637	6.05272	0.2955	14.4147	44.8268
																				0.2965	32.2292	8.82361	0.2965	12.3964	38.6258
																				0.2975	33.254	10.0845	0.2975	17.767	41.2073
																				0.2985	32.8304	9.24	0.2985	27.3519	49.3886
																				0.2995	30.5764	7.40252	0.2995	36.8829	57.179
																				0.3005	27.3383	6.49781	0.3005	43.0999	59.2955
																				0.3015	24.906	7.50997	0.3015	45.8094	53.4015
																				0.3025	24.487	9.67822	0.3025	47.4422	41.163
																				0.3035	25.6239	11.4343	0.3035	49.6988	27.7822
																				0.3045	26.159	12.0616	0.3045	50.9225	19.0629
																				0.3055	23.7282	12.1021	0.3055	48.2708	17.754
																				0.3065	17.9954	12.0398	0.3065	42.4964	22.6363
																				0.3075	11.0606	11.3269	0.3075	38.6034	30.7723
																				0.3085	5.44874	9.26182	0.3085	41.2182	39.9668
																				0.3095	2.23783	6.27097	0.3095	50.7566	49.217
																				0.3105	1.16145	3.70138	0.3105	63.9772	58.4659
																				0.3115	1.74795	2.72476	0.3115	76.0997	69.2901
																				0.3125	3.86468	3.78701	0.3125	81.9849	84.2838
																				0.3135	7.2512	6.59839	0.3135	77.7963	103.764
																				0.3145	10.8706	10.1734	0.3145	63.6864	123.529
																				0.3155	13.3218	13.2151	0.3155	44.9586	136.597
																				0.3165	14.1645	14.8512	0.3165	29.8613	137.13
																				0.3175	14.2338	14.8512	0.3175	25.6395	123.96
																				0.3185	14.1645	13.2117	0.3185	35.348	102.076
																				0.3195	13.3218	10.1516	0.3195	55.8984	80.4115
																				0.3205	10.8706	6.49094	0.3205	78.0836	67.0955
																				0.3215	7.2512	3.37061	0.3215	91.0004	66.0103
																				0.3225	3.86074	1.48241	0.3225	89.4598	76.0448
																				0.3235	1.72228	0.879776	0.3235	77.5247	91.536
																				0.3245	1.03109	1.46394	0.3245	64.7074	104.328
																				0.3255	1.71835	3.28163	0.3255	59.56	108.431
																				0.3265	3.83901	6.16352	0.3265	65.8075	103.521
																				0.3275	7.14652	9.24335	0.3275	81.2674	93.2921
																				0.3285	10.4854	11.3453	0.3285	98.7147	81.2929
																				0.3295	12.2494	12.1506	0.3295	108.766	69.4521
																				0.3305	11.943	12.5403	0.3305	104.346	59.1296
																				0.3315	10.9263	13.4114	0.3315	85.018	51.6448
																				0.3325	10.9263	14.6723	0.3325	57.8682	48.2386
																				0.3335	11.943	15.7276	0.3335	33.035	50.7944
																				0.3345	12.2494	16.3118	0.3345	17.5112	61.9541
																				0.3355	10.4854	16.4749	0.3355	12.6985	82.5539
																				0.3365	7.14258	16.2261	0.3365	15.995	108.625
																				0.3375	3.81728	15.4035	0.3375	23.2044	131.991
																				0.3385	1.61367	13.7826	0.3385	30.6428	144.188
																				0.3395	0.649834	11.634	0.3395	36.9908	140.485
																				0.3405	0.671566	10.1705	0.3405	43.2462	123.036
																				0.3415	1.74402	10.7698	0.3415	50.2442	101.176
																				0.3425	4.32889	13.5222	0.3425	56.5355	85.4017
																				0.3435	8.70491	16.9062	0.3435	59.1398	79.1056
																				0.3445	14.1645	19.086	0.3445	56.3607	77.5916
																				0.3455	18.8507	19.3937	0.3455	49.4937	74.9586
																				0.3465	20.7101	18.5307	0.3465	41.1794	69.4754
																				0.3475	18.8507	17.5508	0.3475	32.6126	62.9149
																				0.3485	14.1684	16.8879	0.3485	23.6299	57.8608
																				0.3495	8.73058	16.3151	0.3495	14.9167	56.1615
																				0.3505	4.45531	15.3364	0.3505	8.46406	57.7224
																				0.3515	2.2339	13.4618	0.3515	6.05502	59.7186
																				0.3525	2.12921	10.7442	0.3525	8.18423	58.0761
																				0.3535	3.9437	8.38975	0.3535	13.7526	51.2899
																				0.3545	7.14258	8.3748	0.3545	19.9586	42.9219
																				0.3555	10.359	12.0088	0.3555	23.686	39.1689
																				0.3565	11.7338	18.5307	0.3565	24.7529	43.2669
																				0.3575	10.355	24.939	0.3575	27.6115	52.6484
																				0.3585	7.11691	27.6209	0.3585	38.0293	62.0198
																				0.3595	3.81334	24.939	0.3595	56.6407	68.404
																				0.3605	1.61367	18.5274	0.3605	75.6998	71.9801
																				0.3615	0.645898	11.987	0.3615	83.693	72.979
																				0.3625	0.645898	8.26401	0.3625	74.7819	70.7492
																				0.3635	1.61367	7.95153	0.3635	53.6971	66.5948
																				0.3645	3.81334	9.39444	0.3645	31.0799	64.2725
																				0.3655	7.11691	10.2272	0.3655	15.1497	65.539
																				0.3665	10.355	9.3088	0.3665	8.24143	67.0917
																				0.3675	11.7338	7.62411	0.3675	8.9565	63.7372
																				0.3685	10.355	7.35242	0.3685	14.7675	53.9202
																				0.3695	7.11691	10.0988	0.3695	22.6224	41.3162
																				0.3705	3.80941	15.716	0.3705	29.3668	31.1481
																				0.3715	1.588	22.1833	0.3715	33.0026	25.349
																				0.3725	0.515547	26.4272	0.3725	33.0026	21.6719
																				0.3735	0.130351	26.0002	0.3735	29.3594	17.2883
																				0.3745	0.0256676	20.8416	0.3745	22.5591	12.2443
																				0.3755	0.00393625	13.4485	0.3755	14.4243	9.19003
																				0.3765	0	6.91421	0.3765	7.50512	10.8414
																				0.3775	0	2.81039	0.3775	3.39122	17.8904
																				0.3785	0	0.898248	0.3785	2.46236	28.04
																				0.3795	0	0.224942	0.3795	5.29779	36.8326
																				0.3805	0	0.0436349	0.3805	13.7841	40.8274
																				0.3815	0	0.00669163	0.3815	30.0354	40.4552
																				0.3825	0	0	0.3825	53.4186	38.7827
																				0.3835	0	0	0.3835	78.6736	37.5201
																				0.3845	0	0	0.3845	97.9763	35.5046
																				0.3855	0	0	0.3855	105.173	31.1751
																				0.3865	0	0	0.3865	98.2151	25.6298
																				0.3875	0	0	0.3875	79.6474	22.8842
																				0.3885	0	0	0.3885	56.4255	27.0744
																				0.3895	0	0	0.3895	37.272	39.0371
																				0.3905	0	0	0.3905	27.4323	55.3244
																				0.3915	0	0	0.3915	25.6408	70.5767
																				0.3925	0	0	0.3925	26.9392	81.0077
																				0.3935	0	0	0.3935	28.3183	85.9611
																				0.3945	0	0	0.3945	30.9228	87.2288
																				0.3955	0	0	0.3955	36.9576	87.9984
																				0.3965	0	0	0.3965	45.802	91.7066
																				0.3975	0	0	0.3975	53.5359	99.5696
																				0.3985	0	0.00334581	0.3985	55.4127	108.24
																				0.3995	0	0.0251633	0.3995	48.9748	111.554
																				0.4005	0	0.132616	0.4005	36.0581	105.941
																				0.4015	0	0.552359	0.4015	21.8586	93.5851
																				0.4025	0	1.80983	0.4025	11.4151	80.1978
																				0.4035	0	4.69859	0.4035	7.0214	70.7279
																				0.4045	0	9.72893	0.4045	8.43045	67.2861
																				0.4055	0	16.2228	0.4055	13.7862	69.8614
																				0.4065	0	22.1243	0.4065	19.8617	77.2913
																				0.4075	0	25.2631	0.4075	23.1451	86.5625
																				0.4085	0	25.0027	0.4085	22.5591	92.8162
																				0.4095	0	22.4991	0.4095	20.646	92.455
																				0.4105	0	19.439	0.4105	20.6945	86.0225
																				0.4115	0	16.6425	0.4115	22.8612	76.7294
																				0.4125	0	13.7826	0.4125	24.4062	67.2466
																				0.4135	0	10.395	0.4135	24.0328	59.0412
																				0.4145	0	6.95097	0.4145	24.7089	52.733
																				0.4155	0	4.70194	0.4155	31.0874	47.203
																				0.4165	0	4.60961	0.4165	44.1715	40.1354
																				0.4175	0	6.49094	0.4175	59.1472	31.3031
																				0.4185	0	8.91259	0.4185	68.7806	24.0188
																				0.4195	0	9.99555	0.4195	68.9527	22.0814
																				0.4205	0	8.80513	0.4205	60.9926	25.9961
																				0.4215	0	6.05272	0.4215	49.8238	32.8325
																				0.4225	0	3.25981	0.4225	41.1772	39.1788
																				0.4235	0	1.4606	0.4235	39.3235	43.6757
																				0.4245	0.00393625	0.87643	0.4245	44.7124	47.2853
																				0.4255	0.0256676	1.46394	0.4255	53.1944	51.9714
																				0.4265	0.130351	3.28163	0.4265	59.2106	59.0748
																				0.4275	0.515547	6.16352	0.4275	60.1083	68.17
																				0.4285	1.588	9.24	0.4285	56.7864	77.2028
																				0.4295	3.80941	11.3235	0.4295	51.2692	83.9382
																				0.4305	7.11691	12.0398	0.4305	45.5794	87.2034
																				0.4315	10.355	12.0987	0.4315	42.3662	86.5745
																				0.4325	11.7338	12.0398	0.4325	43.6234	81.3162
																				0.4335	10.355	11.3235	0.4335	47.3443	70.4852
																				0.4345	7.11691	9.24	0.4345	47.5809	54.5155
																				0.4355	3.80941	6.16017	0.4355	40.1414	36.3875
																				0.4365	1.588	3.25981	0.4365	27.1398	20.3843
																				0.4375	0.515547	1.35314	0.4375	14.447	9.3854
																				0.4385	0.130351	0.438215	0.4385	6.05502	3.49814
																				0.4395	0.0256676	0.110798	0.4395	2.20128	1.04396
																				0.4405	0.00393625	0.0218175	0.4405	1.51473	0.247203
																				0.4415	0	0.00334581	0.4415	3.34274	0.0457514
																				0.4425	0	0	0.4425	8.1991	0.0060833
																				0.4435	0	0	0.4435	16.5396	0
																				0.4445	0	0	0.4445	27.2475	0
																				0.4455	0	0.00334581	0.4455	37.5545	0
																				0.4465	0	0.0218175	0.4465	45.1182	0
																				0.4475	0	0.110798	0.4475	50.0054	0
																				0.4485	0	0.441561	0.4485	53.6971	0.0060833
																				0.4495	0	1.37162	0.4495	55.8564	0.0457514
																				0.4505	0	3.34879	0.4505	53.7171	0.259369
																				0.4515	0	6.48759	0.4515	46.3531	1.11721
																				0.4525	0	10.1516	0.4525	38.2005	3.85529
																				0.4535	0	13.2117	0.4535	35.7758	10.7317
																				0.4545	0.00393625	14.8512	0.4545	40.9978	24.2487
																				0.4555	0.0256676	14.8512	0.4555	49.6775	44.6639
																				0.4565	0.130351	13.2117	0.4565	56.6069	67.1339
																				0.4575	0.515547	10.1516	0.4575	59.9857	82.1592
																				0.4585	1.588	6.48759	0.4585	59.7725	81.4897
																				0.4595	3.80941	3.34879	0.4595	54.5302	65.3385
																				0.4605	7.11691	1.37162	0.4605	43.1409	43.1512
																				0.4615	10.355	0.441561	0.4615	28.3524	26.7368
																				0.4625	11.7338	0.110798	0.4625	15.6596	23.1999
																				0.4635	10.355	0.0218175	0.4635	9.05457	32.9463
																				0.4645	7.11691	0.00334581	0.4645	9.15061	51.2255
																				0.4655	3.80941	0	0.4655	13.9355	70.8947
																				0.4665	1.588	0	0.4665	19.6565	85.8171
																				0.4675	0.515547	0	0.4675	22.1787	92.7344
																				0.4685	0.130351	0.00334581	0.4685	19.5595	90.8301
																				0.4695	0.0256676	0.0251633	0.4695	13.4431	81.4926
																				0.4705	0.00393625	0.139307	0.4705	7.19555	68.6314
																				0.4715	0	0.592648	0.4715	2.99955	56.7552
																				0.4725	0	2.01296	0.4725	0.981247	47.7751
																				0.4735	0	5.48604	0.4735	0.294701	40.3359
																				0.4745	0	12.0978	0.4745	0.294701	32.2036
																				0.4755	0	21.7654	0.4755	0.981247	22.8459
																				0.4765	0	32.2274	0.4765	2.99955	13.8742
																				0.4775	0	39.6389	0.4775	7.19555	7.52044
																				0.4785	0	40.9588	0.4785	13.4431	5.11589
																				0.4795	0	36.131	0.4795	19.5595	6.72977
																				0.4805	0	28.0101	0.4805	22.1713	11.2461
																				0.4815	0.00393625	20.3038	0.4815	19.608	16.2444
																				0.4825	0.0256676	15.3474	0.4825	13.6893	18.9369
																				0.4835	0.130351	13.0522	0.4835	8.16936	18.4574
																				0.4845	0.515547	11.5921	0.4845	6.01397	16.8861
																				0.4855	1.588	9.39778	0.4855	8.26633	16.8861
																				0.4865	3.80941	6.60843	0.4865	14.1817	18.4635
																				0.4875	7.11691	4.63143	0.4875	21.5556	18.9705
																				0.4885	10.355	4.70194	0.4885	28.1704	16.4062
																				0.4895	11.7338	6.9258	0.4895	33.9506	11.8414
																				0.4905	10.355	10.2624	0.4905	40.3292	8.3872
																				0.4915	7.11691	13.2335	0.4915	46.3146	8.55506
																				0.4925	3.80941	14.8545	0.4925	47.3273	12.6717
																				0.4935	1.588	14.8512	0.4935	40.0929	19.0618
																				0.4945	0.515547	13.2151	0.4945	27.1323	25.6606
																				0.4955	0.130351	10.1734	0.4955	14.4545	31.9623
																				0.4965	0.0256676	6.59839	0.4965	6.1035	39.0239
																				0.4975	0.00393625	3.79036	0.4975	2.45493	47.0569
																				0.4985	0	2.74323	0.4985	2.53703	53.9224
																				0.4995	0	3.79036	0.4995	6.5885	57.2477
																				0.5005	0	6.59839	0.5005	16.3536	57.6766
																				0.5015	0	10.1734	0.5015	32.9001	58.3852
																				0.5025	0	13.2151	0.5025	53.6071	61.0041
																				0.5035	0	14.8512	0.5035	71.7062	63.7933
																				0.5045	0	14.8512	0.5045	80.1857	64.4522
																				0.5055	0	13.2117	0.5055	77.2129	62.7547
																				0.5065	0	10.1516	0.5065	67.9013	59.4442
																				0.5075	0	6.48759	0.5075	59.7713	54.2865
																				0.5085	0	3.34879	0.5085	55.4652	46.4577
																				0.5095	0	1.37162	0.5095	50.8677	36.0581
																				0.5105	0	0.441561	0.5105	41.4173	24.5919
																				0.5115	0	0.110798	0.5115	28.4157	14.2955
																				0.5125	0	0.0218175	0.5125	17.7338	6.89156
																				0.5135	0.00393625	0.00334581	0.5135	14.1908	2.70746
																				0.5145	0.0256676	0.0100374	0.5145	18.4387	0.927926
																				0.5155	0.130351	0.0654524	0.5155	27.4937	0.650105
																				0.5165	0.515547	0.332394	0.5165	36.6777	1.84071
																				0.5175	1.588	1.31465	0.5175	42.1335	5.75695
																				0.5185	3.80941	4.04939	0.5185	42.8025	14.4698
																				0.5195	7.11691	9.71399	0.5195	40.213	28.8954
																				0.5205	10.355	18.1481	0.5205	36.1065	46.3356
																				0.5215	11.7338	26.4054	0.5215	30.8741	61.0157
																				0.5225	10.355	29.9212	0.5225	25.0066	68.6263
																				0.5235	7.11691	26.4087	0.5235	21.4867	69.9511
																				0.5245	3.80941	18.1699	0.5245	25.0935	68.8928
																				0.5255	1.588	9.82813	0.5255	38.152	67.7671
																				0.5265	0.515547	4.50943	0.5265	56.7891	65.718
																				0.5275	0.130351	2.77524	0.5275	72.3028	61.0837
																				0.5285	0.0256676	4.01195	0.5285	77.7814	54.3351
																				0.5295	0.00393625	7.48644	0.5295	73.2566	48.2686
																				0.5305	0	12.1606	0.5305	63.6873	45.5656
																				0.5315	0	16.4613	0.5315	53.3024	47.097
																				0.5325	0	18.9534	0.5325	43.658	52.6063
																				0.5335	0	19.2611	0.5335	35.9578	61.2776
																				0.5345	0	18.0892	0.5345	32.4227	70.4642
																				0.5355	0	16.201	0.5355	34.7652	75.2942
																				0.5365	0	13.6499	0.5365	42.8077	71.8253
																				0.5375	0.00393625	10.2624	0.5375	54.6709	60.8133
																				0.5385	0.0256676	6.50941	0.5385	66.3073	46.9925
																				0.5395	0.130351	3.35214	0.5395	71.3775	34.9942
																				0.5405	0.515547	1.37162	0.5405	65.2711	27.621
																				0.5415	1.588	0.441561	0.5415	50.4675	27.0805
																				0.5425	3.80941	0.110798	0.5425	35.5296	34.3399
																				0.5435	7.11691	0.0218175	0.5435	27.7085	46.1493
																				0.5445	10.355	0.00334581	0.5445	27.7599	55.4706
																				0.5455	11.7338	0.00334581	0.5455	31.7995	57.7106
																				0.5465	10.355	0.0218175	0.5465	36.3453	55.7482
																				0.5475	7.11691	0.110798	0.5475	40.2615	56.0233
																				0.5485	3.80941	0.441561	0.5485	42.8099	59.8432
																				0.5495	1.588	1.37496	0.5495	42.126	61.9083
																				0.5505	0.515547	3.37061	0.5505	36.6366	58.3873
																				0.5515	0.130351	6.59839	0.5515	27.296	52.8191
																				0.5525	0.0256676	10.5898	0.5525	17.7111	51.3998
																				0.5535	0.00393625	14.5649	0.5535	12.1502	54.959
																				0.5545	0	18.111	0.5545	13.4409	58.4303
																				0.5555	0	21.0113	0.5555	21.6609	56.8187
																				0.5565	0	22.4517	0.5565	33.2562	49.4206
																				0.5575	0	21.4751	0.5575	41.7719	39.1258
																				0.5585	0	18.5274	0.5585	41.7308	30.2513
																				0.5595	0	15.4475	0.5595	33.0026	27.0286
																				0.5605	0	13.4114	0.5605	20.6386	31.4167
																				0.5615	0	11.7651	0.5615	10.1951	40.7966
																				0.5625	0	9.35749	0.5625	3.97336	48.9062
																				0.5635	0	6.22562	0.5635	1.22003	50.6775
																				0.5645	0	3.49145	0.5645	0.294701	46.0984
																				0.5655	0	2.27321	0.5655	0.0559184	38.9842
																				0.5665	0	3.36275	0.5665	0.00743514	32.7072
																				0.5675	0	7.48504	0.5675	0	28.069
																				0.5685	0	14.931	0.5685	0	24.7476
																				0.5695	0	24.5211	0.5695	0.00743514	22.8738
																				0.5705	0	33.396	0.5705	0.0484832	22.1041
																				0.5715	0	38.4451	0.5715	0.246218	20.6279
																				0.5725	0	38.0956	0.5725	0.973812	16.8122
																				0.5735	0	32.8847	0.5735	3.00699	11.24
																				0.5745	0	24.7939	0.5745	7.24403	6.13447
																				0.5755	0	16.265	0.5755	13.6893	3.30277
																				0.5765	0	9.41213	0.5765	20.5333	3.49205
																				0.5775	0.00393625	5.52968	0.5775	25.1634	7.08692
																				0.5785	0.0256676	4.92688	0.5785	26.7551	14.2895
																				0.5795	0.130351	6.96944	0.5795	26.8935	24.3569
																				0.5805	0.515547	10.2691	0.5805	26.8036	35.0599
																				0.5815	1.588	13.2335	0.5815	25.4096	43.2068
																				0.5825	3.80941	14.8545	0.5825	21.5146	45.9329
																				0.5835	7.11691	14.8512	0.5835	16.7373	42.4788
																				0.5845	10.355	13.2117	0.5845	14.6858	35.3436
																				0.5855	11.7338	10.1516	0.5855	17.4239	28.6939
																				0.5865	10.355	6.48759	0.5865	23.5403	24.6255
																				0.5875	7.11691	3.34879	0.5875	29.6541	21.8336
																				0.5885	3.80941	1.37162	0.5885	33.2973	18.6407
																				0.5895	1.588	0.441561	0.5895	33.9838	16.3559
																				0.5905	0.515547	0.110798	0.5905	32.3589	18.544
																				0.5915	0.134287	0.0218175	0.5915	29.7546	27.1136
																				0.5925	0.0513352	0.00334581	0.5925	27.8599	39.4934
																				0.5935	0.134287	0	0.5935	27.0013	49.9623
																				0.5945	0.515547	0	0.5945	25.2268	54.1442
																				0.5955	1.588	0.00334581	0.5955	20.6377	51.9792
																				0.5965	3.80941	0.0318549	0.5965	14.1966	46.4885
																				0.5975	7.12085	0.186288	0.5975	9.29606	41.0122
																				0.5985	10.3807	0.836062	0.5985	9.54701	38.1764
																				0.5995	11.8642	2.99684	0.5995	17.5587	40.0017
																				0.6005	10.8706	8.60538	0.6005	34.1127	47.5466
																				0.6015	8.70491	19.8346	0.6015	56.6067	60.2223
																				0.6025	7.61882	36.7747	0.6025	78.6704	75.2587
																				0.6035	8.70491	54.9654	0.6035	92.7035	88.0819
																				0.6045	10.8706	66.4781	0.6045	94.0191	95.0171
																				0.6055	11.8642	65.6139	0.6055	83.8434	96.4963
																				0.6065	10.3807	53.8409	0.6065	68.8873	95.5834
																				0.6075	7.12085	38.0137	0.6075	56.5369	92.4093
																				0.6085	3.80941	24.1753	0.6085	49.3014	83.0021
																				0.6095	1.588	14.2766	0.6095	44.2117	65.7516
																				0.6105	0.515547	7.71823	0.6105	37.3342	46.0226
																				0.6115	0.130351	3.64588	0.6115	28.0721	31.4596
																				0.6125	0.0256676	1.46892	0.6125	19.5055	24.5348
																				0.6135	0.00393625	0.669849	0.6135	15.3723	22.133
																				0.6145	0	0.987229	0.6145	16.6888	21.4917
																				0.6155	0	2.72141	0.6155	20.5818	24.3738
																				0.6165	0	6.47934	0.6165	22.4249	34.5723
																				0.6175	0	12.1021	0.6175	19.6639	51.4937
																				0.6185	0	17.6321	0.6185	13.7526	67.142
																				0.6195	0	20.1052	0.6195	8.46406	71.4097
																				0.6205	0	18.2852	0.6205	7.21913	61.5421
																				0.6215	0	14.4358	0.6215	12.1427	44.9787
																				0.6225	0	12.8518	0.6225	23.8844	31.9116
																				0.6235	0	16.5748	0.6235	40.2466	26.6167
																				0.6245	0	25.015	0.6245	55.1739	26.613
																				0.6255	0.00393625	33.8483	0.6255	61.2829	27.6461
																				0.6265	0.0256676	37.5947	0.6265	55.1664	27.1272
																				0.6275	0.130351	33.6367	0.6275	40.1981	24.0396
																				0.6285	0.515547	24.1604	0.6285	23.6382	18.4574
																				0.6295	1.59193	13.9893	0.6295	11.1763	11.7956
																				0.6305	3.83508	6.83584	0.6305	4.2755	6.08872
																				0.6315	7.24726	3.79762	0.6315	1.56321	2.49385
																				0.6325	10.8706	4.35784	0.6325	1.5296	0.802838
																				0.6335	13.3218	7.55695	0.6335	4.07776	0.207534
																				0.6345	14.1645	12.0683	0.6345	10.4488	0.0793362
																				0.6355	14.2338	16.0265	0.6355	21.6198	0.207534
																				0.6365	14.1645	17.6036	0.6365	36.0506	0.796755
																				0.6375	13.3218	16.0231	0.6375	49.1726	2.46026
																				0.6385	10.8706	12.0398	0.6385	56.1887	5.9391
																				0.6395	7.24726	7.39917	0.6395	55.8079	11.2797
																				0.6405	3.83508	3.67621	0.6405	50.9718	17.2029
																				0.6415	1.59193	1.4606	0.6415	46.1972	22.1817
																				0.6425	0.515547	0.463378	0.6425	44.1715	26.805
																				0.6435	0.130351	0.135961	0.6435	44.0225	33.8119
																				0.6445	0.0256676	0.132616	0.6445	42.4207	44.0958
																				0.6455	0.00393625	0.441561	0.6455	36.6851	53.4372
																				0.6465	0	1.3498	0.6465	27.2549	55.7695
																				0.6475	0	3.238	0.6475	17.4649	50.132
																				0.6485	0	6.05272	0.6485	11.1763	42.3759
																				0.6495	0	8.82361	0.6495	10.4413	39.3762
																				0.6505	0	10.0845	0.6505	14.4728	43.1856
																				0.6515	0	9.24	0.6515	19.8617	50.7273
																				0.6525	0	7.39917	0.6525	22.4586	56.7791
																				0.6535	0	6.47934	0.6535	20.5556	56.9161
																				0.6545	0	7.42099	0.6545	16.547	50.0964
																				0.6555	0	9.3508	0.6555	14.9395	39.7809
																				0.6565	0	10.5227	0.6565	18.6849	31.377
																				0.6575	0	10.1767	0.6575	27.7525	27.8367
																				0.6585	0	9.31253	0.6585	40.7745	28.2765
																				0.6595	0	9.39817	0.6595	56.6967	30.4942
																				0.6605	0	10.5898	0.6605	73.2566	33.1427
																				0.6615	0	11.7617	0.6615	84.772	35.1056
																				0.6625	0	12.1506	0.6625	84.8158	34.6682
																				0.6635	0	12.1206	0.6635	72.5903	30.7264
																				0.6645	0	12.0431	0.6645	54.8839	24.5461
																				0.6655	0	11.3235	0.6655	40.3903	19.38
																				0.6665	0	9.24	0.6665	32.7805	17.689
																				0.6675	0	6.16017	0.6675	30.1365	18.6589
																				0.6685	0	3.25981	0.6685	30.1241	18.9705
																				0.6695	0	1.35314	0.6695	33.7357	16.2108
																				0.6705	0	0.438215	0.6705	43.4034	11.0385
																				0.6715	0	0.110798	0.6715	59.0783	5.89335
																				0.6725	0	0.0218175	0.6725	77.2893	2.45418
																				0.6735	0	0.00334581	0.6735	93.0799	0.796755
																				0.6745	0	0	0.6745	101.973	0.201451
																				0.6755	0	0	0.6755	101.222	0.0396681
																				0.6765	0	0	0.6765	91.0721	0.0060833
																				0.6775	0	0	0.6775	75.2985	0
																				0.6785	0	0	0.6785	59.4433	0
																				0.6795	0	0	0.6795	47.7194	0
																				0.6805	0	0	0.6805	41.2925	0
																				0.6815	0	0	0.6815	39.0099	0
																				0.6825	0	0	0.6825	39.3449	0
																				0.6835	0	0	0.6835	41.2353	0.0121666
																				0.6845	0	0	0.6845	43.0635	0.0793362
																				0.6855	0	0	0.6855	42.2156	0.402902
																				0.6865	0	0	0.6865	36.8344	1.59351
																				0.6875	0	0	0.6875	27.9825	4.91444
																				0.6885	0	0	0.6885	19.5391	11.8203
																				0.6895	0	0	0.6895	15.626	22.2388
																				0.6905	0	0	0.6905	17.7111	33.0169
																				0.6915	0	0	0.6915	23.8425	39.6045
																				0.6925	0	0	0.6925	30.6838	40.7905
																				0.6935	0	0	0.6935	36.5431	40.6849
																				0.6945	0	0	0.6945	42.1532	44.5275
																				0.6955	0	0	0.6955	48.8016	53.5155
																				0.6965	0	0	0.6965	56.5097	64.614
																				0.6975	0.00393625	0	0.6975	63.4743	73.6613
																				0.6985	0.0256676	0	0.6985	66.1837	77.5783
																				0.6995	0.130351	0	0.6995	61.162	75.3803
																				0.7005	0.519484	0	0.7005	48.7695	68.2662
																				0.7015	1.6176	0	0.7015	35.135	57.9882
																				0.7025	3.96543	0	0.7025	28.9027	45.577
																				0.7035	7.76281	0	0.7035	35.3069	32.6891
																				0.7045	12.4586	0	0.7045	52.4225	23.0002
																				0.7055	17.1351	0.00334581	0.7055	72.0264	20.3968
																				0.7065	21.307	0.0218175	0.7065	84.8765	25.3066
																				0.7075	24.7192	0.110798	0.7075	86.6093	33.0565
																				0.7085	26.4177	0.438215	0.7085	79.0993	36.7564
																				0.7095	25.2905	1.3498	0.7095	67.5296	33.0901
																				0.7105	21.9273	3.238	0.7105	57.3919	25.4562
																				0.7115	18.6891	6.05272	0.7115	52.5945	20.9127
																				0.7125	17.3661	8.82361	0.7125	53.587	24.2487
																				0.7135	17.6546	10.0845	0.7135	56.8861	34.489
																				0.7145	18.1435	9.24	0.7145	57.3826	45.5787
																				0.7155	17.7583	7.39917	0.7155	52.2617	50.4274
																				0.7165	16.0884	6.47599	0.7165	43.5073	45.9848
																				0.7175	13.535	7.39917	0.7175	36.1001	35.545
																				0.7185	11.4419	9.24335	0.7185	33.351	26.0243
																				0.7195	11.0567	10.1063	0.7195	34.896	22.5912
																				0.7205	11.9687	8.9344	0.7205	39.4234	25.3429
																				0.7215	12.2533	6.49094	0.7215	47.4657	30.1708
																				0.7225	10.4854	4.58779	0.7225	60.249	32.2537
																				0.7235	7.14258	4.58779	0.7235	76.2151	29.1787
																				0.7245	3.81334	6.48759	0.7245	89.1913	21.8966
																				0.7255	1.588	8.91259	0.7255	91.1496	13.4591
																				0.7265	0.515547	9.99555	0.7265	78.8448	6.72369
																				0.7275	0.130351	8.80513	0.7275	58.1144	2.85708
																				0.7285	0.0256676	6.04937	0.7285	40.2231	1.63926
																				0.7295	0.0078725	3.238	0.7295	33.6591	2.70138
																				0.7305	0.0256676	1.3498	0.7305	39.1515	6.13447
																				0.7315	0.130351	0.438215	0.7315	50.5647	11.8475
																				0.7325	0.515547	0.110798	0.7325	59.0366	18.6985
																				0.7335	1.59193	0.0218175	0.7335	57.89	25.0195
																				0.7345	3.83508	0.00334581	0.7345	46.6167	30.2591
																				0.7355	7.24726	0	0.7355	31.1057	35.3832
																				0.7365	10.8706	0	0.7365	19.3457	41.1089
																				0.7375	13.3218	0	0.7375	16.4889	46.2563
																				0.7385	14.1645	0	0.7385	22.8809	48.3871
																				0.7395	14.2338	0.00334581	0.7395	34.4763	46.1194
																				0.7405	14.1645	0.0251633	0.7405	44.8199	40.5406
																				0.7415	13.3218	0.132616	0.7415	48.9487	33.9333
																				0.7425	10.8706	0.549013	0.7425	46.5426	27.6812
																				0.7435	7.24726	1.78801	0.7435	40.7054	22.5905
																				0.7445	3.83508	4.58779	0.7445	34.411	20.5857
																				0.7455	1.59193	9.28737	0.7455	30.0729	24.0188
																				0.7465	0.519484	14.8512	0.7465	31.248	32.7987
																				0.7475	0.156018	18.7755	0.7475	41.3567	43.5288
																				0.7485	0.156018	18.7755	0.7485	59.6211	52.2749
																				0.7495	0.52342	14.8512	0.7495	79.6853	57.5817
																				0.7505	1.61367	9.28737	0.7505	93.1623	60.6103
																				0.7515	3.9437	4.58779	0.7515	94.8921	63.6201
																				0.7525	7.65813	1.78801	0.7525	86.369	68.8872
																				0.7535	12.0773	0.549013	0.7535	75.031	77.4507
																				0.7545	16.0844	0.135961	0.7545	68.7835	87.4049
																				0.7555	19.1903	0.0469807	0.7555	69.8016	93.8985
																				0.7565	21.7969	0.114144	0.7565	73.6536	92.0981
																				0.7575	24.2481	0.441561	0.7575	73.6028	80.9681
																				0.7585	26.1075	1.37162	0.7585	65.3095	64.2261
																				0.7595	26.4832	3.34879	0.7595	49.3775	47.8183
																				0.7605	24.6538	6.49428	0.7605	30.8669	36.9749
																				0.7615	20.49	10.1952	0.7615	15.6111	34.6341
																				0.7625	14.8182	13.4333	0.7625	6.2938	40.0221
																				0.7635	9.37647	15.7276	0.7635	2.00354	47.8772
																				0.7645	6.06897	17.5508	0.7645	0.499871	50.9892
																				0.7655	6.04724	19.6877	0.7655	0.0969664	45.3559
																				0.7665	9.24612	22.2503	0.7665	0.0148703	33.0084
																				0.7675	14.2987	24.0912	0.7675	0	19.7493
																				0.7685	18.8764	23.2963	0.7685	0	10.7317
																				0.7695	20.714	18.9752	0.7695	0	8.36074
																				0.7705	18.8507	12.5403	0.7705	0.00743514	12.8124
																				0.7715	14.1645	6.58679	0.7715	0.0484832	22.2449
																				0.7725	8.70491	2.72141	0.7725	0.246218	32.0523
																				0.7735	4.32496	0.879776	0.7735	0.973812	36.2742
																				0.7745	1.71835	0.221596	0.7745	2.99955	32.0126
																				0.7755	0.541215	0.0436349	0.7755	7.19555	22.0374
																				0.7765	0.134287	0.00669163	0.7765	13.4431	11.976
																				0.7775	0.0256676	0	0.7775	19.5595	5.70511
																				0.7785	0.00393625	0	0.7785	22.1638	4.04769
																				0.7795	0	0	0.7795	19.5595	6.29017
																				0.7805	0	0	0.7805	13.4431	11.0782
																				0.7815	0	0	0.7815	7.19555	16.0154
																				0.7825	0	0	0.7825	2.99955	18.1341
																				0.7835	0	0	0.7835	0.973812	16.0033
																				0.7845	0	0	0.7845	0.253653	10.9989
																				0.7855	0	0	0.7855	0.104402	5.88727
																				0.7865	0	0	0.7865	0.302136	2.45418
																				0.7875	0	0	0.7875	1.22003	0.796755
																				0.7885	0	0	0.7885	3.97336	0.201451
																				0.7895	0	0	0.7895	10.1951	0.0396681
																				0.7905	0	0	0.7905	20.646	0.0060833
																				0.7915	0	0	0.7915	33.0511	0
																				0.7925	0.00393625	0	0.7925	41.9696	0
																				0.7935	0.0256676	0	0.7935	42.7046	0
																				0.7945	0.130351	0	0.7945	36.0581	0
																				0.7955	0.515547	0	0.7955	28.1289	0
																				0.7965	1.59193	0	0.7965	24.8656	0
																				0.7975	3.83508	0	0.7975	27.5547	0
																				0.7985	7.24726	0	0.7985	33.8252	0
																				0.7995	10.8706	0	0.7995	41.4666	0
																				0.8005	13.3218	0	0.8005	49.5011	0
																				0.8015	14.1645	0	0.8015	56.1219	0.0060833
																				0.8025	14.2338	0	0.8025	58.166	0.0457514
																				0.8035	14.1645	0	0.8035	53.5359	0.247203
																				0.8045	13.3218	0	0.8045	43.0487	1.03787
																				0.8055	10.8706	0	0.8055	29.8031	3.45238
																				0.8065	7.24726	0	0.8065	17.4239	9.14428
																				0.8075	3.83508	0	0.8075	8.41558	19.38
																				0.8085	1.59193	0	0.8085	3.29425	33.0908
																				0.8095	0.515547	0	0.8095	1.03717	45.9329
																				0.8105	0.130351	0	0.8105	0.309572	52.5947
																				0.8115	0.0256676	0.00334581	0.8115	0.343185	51.0295
																				0.8125	0.00393625	0.0218175	0.8125	1.2349	43.9279
																				0.8135	0	0.110798	0.8135	4.02185	35.545
																				0.8145	0	0.438215	0.8145	10.4413	28.069
																				0.8155	0.00393625	1.3498	0.8155	21.6124	21.922
																				0.8165	0.0256676	3.238	0.8165	36.0021	18.0216
																				0.8175	0.130351	6.04937	0.8175	48.9189	17.6552
																				0.8185	0.515547	8.80179	0.8185	55.1664	20.701
																				0.8195	1.588	9.97373	0.8195	52.5621	26.2477
																				0.8205	3.80941	8.80179	0.8205	42.8099	35.4272
																				0.8215	7.11691	6.04937	0.8215	29.8105	51.1467
																				0.8225	10.355	3.238	0.8225	17.7111	72.7311
																				0.8235	11.7338	1.3498	0.8235	9.64304	92.6386
																				0.8245	10.359	0.438215	0.8245	7.32353	102.231
																				0.8255	7.14258	0.114144	0.8255	11.5195	100.548
																				0.8265	3.93976	0.0436349	0.8265	22.1123	93.7095
																				0.8275	2.10354	0.114144	0.8275	37.0244	85.8983
																				0.8285	2.10354	0.441561	0.8285	51.9333	75.3806
																				0.8295	3.93976	1.37162	0.8295	62.4179	60.1339
																				0.8305	7.14258	3.34879	0.8305	66.2999	43.5599
																				0.8315	10.359	6.48759	0.8315	63.582	33.0021
																				0.8325	11.7377	10.1516	0.8325	55.8918	33.9263
																				0.8335	10.3807	13.2117	0.8335	47.171	45.7207
																				0.8345	7.24726	14.8512	0.8345	42.4972	62.1327
																				0.8355	4.32496	14.8512	0.8355	43.4998	75.9146
																				0.8365	3.176	13.2117	0.8365	45.8011	83.5217
																				0.8375	4.32496	10.1516	0.8375	43.1971	85.8153
																				0.8385	7.24726	6.48759	0.8385	34.2785	85.8744
																				0.8395	10.3807	3.34879	0.8395	23.7426	87.2319
																				0.8405	11.7377	1.37162	0.8405	17.6517	91.9338
																				0.8415	10.355	0.441561	0.8415	18.4387	98.8549
																				0.8425	7.11691	0.110798	0.8425	24.0253	105.181
																				0.8435	3.80941	0.0218175	0.8435	30.6353	109.581
																				0.8445	1.588	0.00334581	0.8445	36.1065	112.285
																				0.8455	0.515547	0	0.8455	40.4518	113.208
																				0.8465	0.130351	0	0.8465	43.7763	111.861
																				0.8475	0.0256676	0	0.8475	45.1182	107.814
																				0.8485	0.00393625	0	0.8485	43.7763	99.592
																				0.8495	0	0	0.8495	40.4443	84.9803
																				0.8505	0	0	0.8505	36.0581	64.7141
																				0.8515	0	0	0.8515	30.4114	44.4666
																				0.8525	0	0	0.8525	23.197	30.6936
																				0.8535	0	0	0.8535	16.1778	25.2002
																				0.8545	0	0	0.8545	13.3702	25.5274
																				0.8555	0.00393625	0	0.8555	19.2422	30.2786
																				0.8565	0.0256676	0	0.8565	36.0109	41.4178
																				0.8575	0.130351	0	0.8575	60.1349	60.0548
																				0.8585	0.515547	0	0.8585	80.8909	81.3768
																				0.8595	1.588	0	0.8595	86.0734	96.4905
																				0.8605	3.80941	0.0100374	0.8605	72.2186	99.7595
																				0.8615	7.12085	0.0654524	0.8615	48.0246	92.8745
																				0.8625	10.3807	0.332394	0.8625	26.5823	81.597
																				0.8635	11.8642	1.31465	0.8635	16.2178	70.2609
																				0.8645	10.8706	4.04939	0.8645	18.5326	59.9053
																				0.8655	8.70884	9.71399	0.8655	30.6728	50.1513
																				0.8665	7.64448	18.1481	0.8665	46.4675	41.6532
																				0.8675	8.83526	26.4054	0.8675	57.8005	36.5801
																				0.8685	11.3861	29.9212	0.8685	58.7271	36.5283
																				0.8695	13.4522	26.4054	0.8695	49.2962	39.707
																				0.8705	14.1901	18.1481	0.8705	34.9319	41.4573
																				0.8715	14.2378	9.71399	0.8715	22.4902	38.9499
																				0.8725	14.1645	4.04939	0.8725	16.5849	34.0802
																				0.8735	13.3218	1.31465	0.8735	17.9163	30.6867
																				0.8745	10.8706	0.332394	0.8745	23.6783	30.6086
																				0.8755	7.24726	0.0654524	0.8755	29.8667	33.9251
																				0.8765	3.83901	0.0100374	0.8765	34.0323	40.8921
																				0.8775	1.6176	0	0.8775	36.0655	51.6233
																				0.8785	0.645898	0	0.8785	36.8645	64.7202
																				0.8795	0.645898	0	0.8795	37.3191	77.8269
																				0.8805	1.61367	0	0.8805	38.4422	89.357
																				0.8815	3.81334	0	0.8815	41.7483	98.6768
																				0.8825	7.11691	0	0.8825	49.2453	104.46
																				0.8835	10.355	0	0.8835	61.818	103.996
																				0.8845	11.7338	0	0.8845	76.0587	95.4661
																				0.8855	10.359	0	0.8855	83.939	81.3311
																				0.8865	7.14258	0	0.8865	78.5577	69.0619
																				0.8875	3.93976	0	0.8875	60.9777	67
																				0.8885	2.10354	0	0.8885	40.1292	77.3926
																				0.8895	2.10354	0	0.8895	25.5674	93.1795
																				0.8905	3.93976	0	0.8905	20.6696	103.084
																				0.8915	7.14258	0	0.8915	21.8578	100.404
																				0.8925	10.359	0	0.8925	23.0069	86.6935
																				0.8935	11.7338	0	0.8935	20.8914	68.7625
																				0.8945	10.355	0	0.8945	17.4872	53.8822
																				0.8955	7.11691	0	0.8955	17.6853	46.6796
																				0.8965	3.80941	0	0.8965	24.8582	47.8916
																				0.8975	1.588	0	0.8975	37.9572	54.8968
																				0.8985	0.515547	0.00334581	0.8985	52.2206	63.1303
																				0.8995	0.130351	0.0218175	0.8995	62.7052	67.6065
																				0.9005	0.0256676	0.110798	0.9005	67.2326	65.1259
																				0.9015	0.00393625	0.438215	0.9015	66.3428	57.1133
																				0.9025	0	1.3498	0.9025	62.1621	50.5959
																				0.9035	0	3.238	0.9035	57.8831	54.5822
																				0.9045	0	6.04937	0.9045	55.9805	72.7879
																				0.9055	0	8.80179	0.9055	55.9514	98.3969
																				0.9065	0	9.97708	0.9065	55.8696	117.318
																				0.9075	0	8.82361	0.9075	56.6792	119.048
																				0.9085	0	6.16017	0.9085	62.128	105.179
																				0.9095	0	3.67621	0.9095	72.9977	86.6976
																				0.9105	0	2.6996	0.9105	83.2412	73.5186
																				0.9115	0	3.67621	0.9115	84.4004	67.2904
																				0.9125	0	6.16017	0.9125	74.3456	63.0033
																				0.9135	0	8.82361	0.9135	59.8757	55.4629
																				0.9145	0	9.97708	0.9145	49.5692	43.8832
																				0.9155	0	8.80179	0.9155	45.833	31.8773
																				0.9165	0	6.04937	0.9165	45.137	24.4562
																				0.9175	0	3.24469	0.9175	43.7948	24.4187
																				0.9185	0	1.39343	0.9185	41.3248	29.9446
																				0.9195	0	0.659812	0.9195	39.0873	35.4224
																				0.9205	0	0.987229	0.9205	37.8719	35.9841
																				0.9215	0	2.72476	0.9215	37.722	32.1577
																				0.9225	0	6.50116	0.9225	39.0205	29.5032
																				0.9235	0	12.2095	0.9235	43.0539	32.9948
																				0.9245	0	18.0451	0.9245	51.4155	41.9536
																				0.9255	0	21.3224	0.9255	63.8769	50.7987
																				0.9265	0	20.9742	0.9265	75.9687	54.5471
																				0.9275	0	18.7005	0.9275	80.6245	52.8157
																				0.9285	0.00393625	17.091	0.9285	74.0841	48.9427
																				0.9295	0.0256676	17.3937	0.9295	59.5472	46.8537
																				0.9305	0.130351	19.528	0.9305	44.4889	48.9402
																				0.9315	0.515547	23.0008	0.9315	35.0939	55.0403
																				0.9325	1.588	27.11	0.9325	32.9708	62.5732
																				0.9335	3.80941	31.283	0.9335	36.1456	68.3604
																				0.9345	7.13266	35.9779	0.9345	42.2502	70.4245
																				0.9355	10.4577	42.4755	0.9355	49.7063	68.0099
																				0.9365	12.2552	50.8206	0.9365	56.163	61.0831
																				0.9375	12.4172	57.899	0.9375	58.1734	50.4922
																				0.9385	13.4689	58.5331	0.9385	53.5359	37.8773
																				0.9395	19.047	49.9013	0.9395	43.0487	25.2208
																				0.9405	30.0556	34.8125	0.9405	29.8031	14.4634
																				0.9415	41.9357	19.5537	0.9415	17.4239	6.92514
																				0.9425	47.0656	8.7698	0.9425	8.42301	2.70138
																				0.9435	41.4458	3.12782	0.9435	3.34274	0.842506
																				0.9445	28.4716	0.884754	0.9445	1.27595	0.213618
																				0.9455	15.2455	0.198068	0.9455	1.2349	0.0854195
																				0.9465	6.40333	0.0352007	0.9465	3.09652	0.247203
																				0.9475	2.32289	0.00334581	0.9475	7.4492	0.998206
																				0.9485	1.5525	0	0.9485	14.4169	3.25093
																				0.9495	3.27867	0	0.9495	22.5591	8.34144
																				0.9505	7.63456	0	0.9505	29.3594	16.8861
																				0.9515	14.2338	0	0.9515	33.0026	27.0021
																				0.9525	20.7101	0	0.9525	33.0026	34.1373
																				0.9535	23.4676	0	0.9535	29.3594	34.1373
																				0.9545	20.7101	0	0.9545	22.5665	27.0082
																				0.9555	14.2338	0	0.9555	14.4653	16.9319
																				0.9565	7.61882	0	0.9565	7.68798	8.58256
																				0.9575	3.176	0	0.9575	4.02185	4.24914
																				0.9585	1.03109	0	0.9585	3.9808	4.24914
																				0.9595	0.260702	0	0.9595	7.44177	8.58256
																				0.9605	0.0513352	0	0.9605	13.4915	16.9319
																				0.9615	0.0078725	0	0.9615	19.567	27.0143
																				0.9625	0	0	0.9625	22.1638	34.177
																				0.9635	0	0	0.9635	19.5595	34.3509
																				0.9645	0	0	0.9645	13.4431	27.8782
																				0.9655	0	0	0.9655	7.19555	19.7432
																				0.9665	0	0	0.9665	2.99955	15.8222
																				0.9675	0	0	0.9675	0.981247	19.1582
																				0.9685	0	0	0.9685	0.294701	28.776
																				0.9695	0	0	0.9695	0.294701	40.3851
																				0.9705	0	0	0.9705	0.981247	48.1348
																				0.9715	0	0	0.9715	2.99955	47.682
																				0.9725	0	0	0.9725	7.19555	39.533
																				0.9735	0	0	0.9735	13.4431	29.6014
																				0.9745	0.00393625	0	0.9745	19.5595	25.344
																				0.9755	0.0256676	0	0.9755	22.1638	30.3585
																				0.9765	0.134287	0	0.9765	19.5595	41.9811
																				0.9775	0.541215	0	0.9775	13.4431	53.5632
																				0.9785	1.71835	0	0.9785	7.19555	59.088
																				0.9795	4.32496	0	0.9795	2.99955	56.1533
																				0.9805	8.70884	0	0.9805	0.973812	45.9515
																				0.9815	14.1901	0	0.9815	0.246218	32.1241
																				0.9825	18.9811	0	0.9825	0.0559184	19.3557
																				0.9835	21.2256	0	0.9835	0.0633535	11.6014
																				0.9845	20.4426	0	0.9845	0.294701	10.811
																				0.9855	17.9995	0	0.9855	1.22003	16.9176
																				0.9865	15.9561	0	0.9865	3.97336	28.0189
																				0.9875	15.2212	0	0.9875	10.1951	40.1836
																				0.9885	15.1705	0	0.9885	20.6386	48.0555
																				0.9895	15.2212	0	0.9895	33.0026	47.4684
																				0.9905	15.96	0	0.9905	41.7234	38.6966
																				0.9915	18.0252	0	0.9915	41.7234	26.9518
																				0.9925	20.573	0	0.9925	33.01	18.6997
																				0.9935	21.7412	0	0.9935	20.6871	17.113
																				0.9945	20.5691	0	0.9945	10.4413	20.9392
																				0.9955	17.9995	0.00334581	0.9955	4.94717	27.1714
																				0.9965	15.8258	0.0218175	0.9965	4.21958	34.208
[truncated: 2,004 more rows]
