# Supplementary material for: Integration of locomotion and auditory signals in the mouse inferior colliculus
Source: eLife. 2020 Jan 28;9:e52228. doi: 10.7554/eLife.52228 (PMC7004561; doi:10.7554/eLife.52228)
Supplement: Figure 2—source data 1. [file elife-52228-fig2-data1.xlsx]

## Sheet: Sheet1
Figure 2A							Figure 2B								Figure 2C			Figure 2D
Top			Bottom				Top			Bottom								Latency (msec)
time(sec)	Firing rate(Hz)	Speed(cm/s)	time(sec)	Firing rate(Hz)	upper bound	lower bound	time(sec)	Firing rate(Hz)	Speed(cm/s)	time(sec)	Firing rate(Hz)	upper bound	lower bound		x	N		Increased	Decreased
-1	0.536973	0	-0.999	6.24118	2.69524	10.2101	-1	35.6226	0	-0.999	33.8773	21.6579	48.364		-390	0		61	-66
-0.999	0.468873	0	-0.998	6.16517	2.66233	10.1059	-0.999	36.1454	0	-0.998	34.1451	21.8315	48.8134		-370	0		147	127
-0.998	0.405176	0	-0.997	6.08834	2.63747	9.99969	-0.998	36.6718	0	-0.997	34.4185	21.9464	49.2058		-350	0		-65	-53
-0.997	0.345944	0	-0.996	6.01077	2.6075	9.8915	-0.997	37.2012	0	-0.996	34.6976	22.118	49.6028		-330	0		-111	-102
-0.996	0.291235	0	-0.995	5.93254	2.56087	9.7924	-0.996	37.7332	0	-0.995	34.9826	22.299	50.0044		-310	1		-185	-145
-0.995	0.241103	0	-0.994	5.85372	2.51927	9.69339	-0.995	38.2673	0	-0.994	35.2736	22.4429	50.4112		-290	2		-23	50
-0.994	0.195596	0	-0.993	5.77439	2.47889	9.57984	-0.994	38.8028	0	-0.993	35.5705	22.5901	50.8226		-270	0		-120	-18
-0.993	0.154759	0	-0.992	5.69462	2.43055	9.46157	-0.993	39.3368	0	-0.992	35.8727	22.7396	51.2425		-250	0		-221	-159
-0.992	0.118633	0	-0.991	5.6145	2.38668	9.34221	-0.992	39.8665	0	-0.991	36.1796	22.8748	51.682		-230	1		-115
-0.991	0.087251	0	-0.99	5.5341	2.34882	9.22188	-0.991	40.3912	0	-0.99	36.4908	23.0128	52.1506		-210	0		-158
-0.99	0.0606453	0	-0.989	5.45333	2.30697	9.10035	-0.99	40.9105	0	-0.989	36.8062	23.154	52.6574		-190	2		81
-0.989	0.0388415	0	-0.988	5.37209	2.2659	8.9774	-0.989	41.4238	0	-0.988	37.1259	23.2895	53.2221		-170	0		-134
-0.988	0.0218608	0	-0.987	5.29046	2.22327	8.85314	-0.988	41.9307	0	-0.987	37.4497	23.413	53.745		-150	3		-95
-0.987	0.00971986	0	-0.986	5.20853	2.17828	8.72769	-0.987	42.4307	0	-0.986	37.7773	23.5496	54.2617		-130	3		3
-0.986	0.00243056	0	-0.985	5.12637	2.14587	8.59265	-0.986	42.9232	0	-0.985	38.1087	23.7329	54.8101		-110	4		-299
-0.985	0	0	-0.984	5.04406	2.11417	8.45899	-0.985	43.4078	0	-0.984	38.4441	23.9506	55.3567		-90	1		-300
-0.984	0	0	-0.983	4.9615	2.07566	8.32624	-0.984	43.8841	0	-0.983	38.7835	24.1915	55.9013		-70	2		-51
-0.983	0	0	-0.982	4.87862	2.04081	8.17803	-0.983	44.3514	0	-0.982	39.1267	24.4403	56.4434		-50	2		-122
-0.982	0	0	-0.981	4.79548	2.02259	8.0346	-0.982	44.8095	0	-0.981	39.4736	24.6994	56.9824		-30	2		-187
-0.981	0	0	-0.98	4.71217	2.0056	7.8925	-0.981	45.2578	0	-0.98	39.824	25.0339	57.4901		-10	1		-121
-0.98	0	0	-0.979	4.62877	1.977	7.7632	-0.98	45.6959	0	-0.979	40.1779	25.2495	57.9375		10	1		-22
-0.979	0	0	-0.978	4.54553	1.9396	7.633	-0.979	46.1234	0	-0.978	40.5355	25.4158	58.3793		30	0		-296
-0.978	0	0	-0.977	4.46272	1.89365	7.50228	-0.978	46.5399	0	-0.977	40.8965	25.586	58.8779		50	1
-0.977	0	0	-0.976	4.3804	1.84498	7.36571	-0.977	46.9449	0	-0.976	41.2606	25.8355	59.3904		70	1
-0.976	0	0	-0.975	4.29867	1.79676	7.22127	-0.976	47.3381	0	-0.975	41.6273	26.0961	59.9002		90	1
-0.975	0	0	-0.974	4.2176	1.74904	7.07655	-0.975	47.719	0	-0.974	41.996	26.3762	60.4067		110	0
-0.974	0	0	-0.973	4.13726	1.70188	6.93168	-0.974	48.0874	0	-0.973	42.3664	26.6275	60.9097		130	1
-0.973	0	0	-0.972	4.05775	1.66394	6.77911	-0.973	48.4428	0	-0.972	42.738	26.9491	61.4084		150	1
-0.972	0	0	-0.971	3.97913	1.63136	6.64055	-0.972	48.7849	0	-0.971	43.1103	27.2077	61.9021		170	0
-0.971	0	0	-0.97	3.90131	1.6077	6.50565	-0.971	49.1133	0	-0.97	43.4835	27.4498	62.3909		190	0
-0.97	0	0	-0.969	3.8242	1.58474	6.37963	-0.97	49.4278	0	-0.969	43.8577	27.7392	62.8747		210	0
-0.969	0	0	-0.968	3.74786	1.55337	6.27128	-0.969	49.728	0	-0.968	44.2324	28.0234	63.3129		230	0
-0.968	0	0	-0.967	3.67237	1.52192	6.13164	-0.968	50.0137	0	-0.967	44.6073	28.2581	63.7198		250	0
-0.967	0	0	-0.966	3.59781	1.51067	6.02466	-0.967	50.2845	0	-0.966	44.9818	28.5255	64.1778		270	0
-0.966	0	0	-0.965	3.52424	1.45841	5.89725	-0.966	50.5403	0	-0.965	45.3557	28.8242	64.6268		290	0
-0.965	0	0	-0.964	3.45175	1.40224	5.76844	-0.965	50.783	0	-0.964	45.7284	29.1249	65.1185		310	0
-0.964	0	0	-0.963	3.3804	1.35345	5.63972	-0.964	51.0151	0	-0.963	46.0995	29.4001	65.5675		330	0
-0.963	0	0	-0.962	3.31026	1.32654	5.51123	-0.963	51.2362	0	-0.962	46.4685	29.6612	66.0106		350	0
-0.962	0	0	-0.961	3.2414	1.29127	5.38541	-0.962	51.4461	0	-0.961	46.835	29.8958	66.4769		370	0
-0.961	0	0	-0.96	3.17389	1.24956	5.26631	-0.961	51.6447	0	-0.96	47.1993	30.133	66.9365		390	0
-0.96	0	0	-0.959	3.10778	1.2211	5.17575	-0.96	51.8317	0	-0.959	47.5608	30.3933	67.3875
-0.959	0	0	-0.958	3.04316	1.19254	5.11198	-0.959	52.0069	0	-0.958	47.9191	30.6551	67.8289
-0.958	0	0	-0.957	2.98008	1.16524	5.04598	-0.958	52.1702	0	-0.957	48.2736	30.8354	68.2511
-0.957	0	0	-0.956	2.9186	1.13924	4.95889	-0.957	52.3214	0	-0.956	48.624	31.0587	68.6492
-0.956	0	0	-0.955	2.8586	1.1142	4.85832	-0.956	52.4604	0	-0.955	48.97	31.3466	69.0333
-0.955	0	0	-0.954	2.79998	1.08981	4.76699	-0.955	52.587	0	-0.954	49.3108	31.6947	69.4205
-0.954	0	0	-0.953	2.74279	1.05831	4.67835	-0.954	52.7011	0	-0.953	49.6458	32.0508	69.7935
-0.953	0	0	-0.952	2.68709	1.03892	4.58364	-0.953	52.8027	0	-0.952	49.9748	32.3389	70.1041
-0.952	0	0	-0.951	2.63311	1.02078	4.49829	-0.952	52.8915	0	-0.951	50.2977	32.5821	70.4147
-0.951	0	0	-0.95	2.58106	1.00112	4.43911	-0.951	52.9675	0	-0.95	50.6143	32.8241	70.7203
-0.95	0	0	-0.949	2.53101	0.983606	4.36875	-0.95	53.0307	0	-0.949	50.9246	33.0647	71.0099
-0.949	0	0	-0.948	2.48299	0.968608	4.29866	-0.949	53.0809	0	-0.948	51.2283	33.2698	71.2665
-0.948	0	0	-0.947	2.43707	0.956136	4.25342	-0.948	53.1181	0	-0.947	51.5255	33.5483	71.5379
-0.947	0	0	-0.946	2.39328	0.920989	4.21685	-0.947	53.1424	0	-0.946	51.8159	33.728	71.8684
-0.946	0	0	-0.945	2.35166	0.875131	4.16733	-0.946	53.1536	0	-0.945	52.0992	33.9239	72.0657
-0.945	0	0	-0.944	2.31226	0.840289	4.13454	-0.945	53.1517	0	-0.944	52.3747	34.1724	72.3038
-0.944	0	0	-0.943	2.27511	0.821533	4.1168	-0.944	53.1369	0	-0.943	52.642	34.4131	72.5479
-0.943	0	0	-0.942	2.24026	0.7742	4.08663	-0.943	53.1089	0	-0.942	52.9005	34.6733	72.813
-0.942	0	0	-0.941	2.20773	0.746476	4.07697	-0.942	53.068	0	-0.941	53.1498	34.8728	73.1079
-0.941	0	0	-0.94	2.17738	0.734668	4.05735	-0.941	53.0141	0	-0.94	53.3891	35.078	73.3084
-0.94	0	0	-0.939	2.14907	0.710374	4.02383	-0.94	52.9474	0	-0.939	53.6182	35.2319	73.432
-0.939	0	0	-0.938	2.12283	0.683835	4.00731	-0.939	52.8677	0	-0.938	53.837	35.377	73.5393
-0.938	0	0	-0.937	2.09851	0.652502	3.99581	-0.938	52.7753	0	-0.937	54.0451	35.5363	73.7607
-0.937	0	0	-0.936	2.07595	0.629272	3.99081	-0.937	52.6702	0	-0.936	54.2427	35.7325	74.0818
-0.936	0	0	-0.935	2.05537	0.592609	3.98711	-0.936	52.5526	0	-0.935	54.4296	35.8757	74.3248
-0.935	0	0	-0.934	2.03676	0.572537	3.97318	-0.935	52.4225	0	-0.934	54.6059	36.0074	74.69
-0.934	0	0	-0.933	2.01999	0.541275	3.94175	-0.934	52.28	0	-0.933	54.7717	36.1348	74.769
-0.933	0	0	-0.932	2.00506	0.494366	3.92903	-0.933	52.1254	0	-0.932	54.927	36.2577	74.8645
-0.932	0	0	-0.931	1.99199	0.481274	3.92155	-0.932	51.9587	0	-0.931	55.0719	36.3647	74.9851
-0.931	0	0	-0.93	1.9808	0.453942	3.91009	-0.931	51.7801	0	-0.93	55.2066	36.4675	75.0767
-0.93	0	0	-0.929	1.97148	0.442654	3.91239	-0.93	51.5899	0	-0.929	55.3309	36.5671	75.162
-0.929	0	0	-0.928	1.96407	0.464879	3.90341	-0.929	51.3881	0	-0.928	55.4445	36.6631	75.2334
-0.928	0	0	-0.927	1.95855	0.483518	3.8977	-0.928	51.175	0	-0.927	55.5474	36.727	75.295
-0.927	0	0	-0.926	1.95494	0.50336	3.88948	-0.927	50.9508	0	-0.926	55.6394	36.8404	75.3104
-0.926	0	0	-0.925	1.95323	0.49251	3.88717	-0.926	50.7157	0	-0.925	55.7206	36.8862	75.3356
-0.925	0	0	-0.924	1.95344	0.483242	3.89245	-0.925	50.4699	0	-0.924	55.7911	36.9787	75.2619
-0.924	0	0	-0.923	1.95556	0.487838	3.88969	-0.924	50.2137	0	-0.923	55.8509	37.073	75.1362
-0.923	0	0	-0.922	1.95959	0.483512	3.87669	-0.923	49.9473	0	-0.922	55.8998	37.1507	75.127
-0.922	0	0	-0.921	1.96552	0.479632	3.8869	-0.922	49.671	0	-0.921	55.9379	37.2003	75.0826
-0.921	0	0	-0.92	1.97318	0.476021	3.89865	-0.921	49.3851	0	-0.92	55.965	37.2658	74.9834
-0.92	0	0	-0.919	1.98256	0.474005	3.89976	-0.92	49.0898	0	-0.919	55.9813	37.3335	74.8951
-0.919	0	0	-0.918	1.99399	0.474989	3.91496	-0.919	48.7854	0	-0.918	55.9865	37.3168	74.9147
-0.918	0	0	-0.917	2.00764	0.480231	3.93501	-0.918	48.4722	0	-0.917	55.9809	37.287	74.8617
-0.917	0	0	-0.916	2.02349	0.482376	3.95411	-0.917	48.1506	0	-0.916	55.9642	37.2754	74.7473
-0.916	0	0	-0.915	2.04136	0.490489	3.97157	-0.916	47.8208	0	-0.915	55.9365	37.2712	74.6163
-0.915	0	0	-0.914	2.06106	0.496534	3.99322	-0.915	47.4832	0	-0.914	55.8974	37.2605	74.4685
-0.914	0	0	-0.913	2.08256	0.506766	4.01933	-0.914	47.1381	0	-0.913	55.8468	37.2435	74.3038
-0.913	0	0	-0.912	2.10567	0.531563	4.05345	-0.913	46.7882	0	-0.912	55.7853	37.2313	74.1228
-0.912	0	0	-0.911	2.1302	0.557986	4.06689	-0.912	46.4364	0	-0.911	55.713	37.1793	73.8938
-0.911	0	0	-0.91	2.15612	0.576985	4.09706	-0.911	46.0829	0	-0.91	55.63	37.227	73.6875
-0.91	0	0	-0.909	2.1834	0.607186	4.12878	-0.91	45.7282	0	-0.909	55.5363	37.2554	73.628
-0.909	0	0	-0.908	2.21203	0.639399	4.16202	-0.909	45.3701	0	-0.908	55.4316	37.2479	73.455
-0.908	0	0	-0.907	2.24196	0.665561	4.19671	-0.908	45.0066	0	-0.907	55.3163	37.2368	73.2257
-0.907	0	0	-0.906	2.27318	0.69282	4.24171	-0.907	44.638	0	-0.906	55.1902	37.1704	73.0691
-0.906	0	0	-0.905	2.30547	0.717406	4.28569	-0.906	44.2646	0	-0.905	55.0535	37.056	72.8624
-0.905	0	0	-0.904	2.33863	0.735313	4.30299	-0.905	43.8869	0	-0.904	54.9061	36.8799	72.6706
-0.904	0	0	-0.903	2.37264	0.771082	4.32006	-0.904	43.5052	0	-0.903	54.7479	36.8074	72.4978
-0.903	0	0	-0.902	2.40745	0.796954	4.36959	-0.903	43.1199	0	-0.902	54.5787	36.7445	72.3078
-0.902	0	0	-0.901	2.44303	0.815199	4.41312	-0.902	42.7313	0	-0.901	54.3984	36.6642	72.0289
-0.901	0	0	-0.9	2.47936	0.84579	4.44566	-0.901	42.3399	0	-0.9	54.2066	36.5296	71.7402
-0.9	0	0	-0.899	2.51638	0.872445	4.48505	-0.9	41.946	0	-0.899	54.0031	36.3649	71.5476
-0.899	0	0	-0.898	2.55407	0.910727	4.51852	-0.899	41.55	0	-0.898	53.7882	36.3159	71.3373
-0.898	0	0	-0.897	2.59239	0.949116	4.55168	-0.898	41.1523	0	-0.897	53.5621	36.2887	71.0227
-0.897	0	0	-0.896	2.63131	0.976661	4.59779	-0.897	40.7533	0	-0.896	53.3249	36.2544	70.6876
-0.896	0	0	-0.895	2.67077	1.0075	4.64697	-0.896	40.3533	0	-0.895	53.077	36.1559	70.29
-0.895	0	0	-0.894	2.71076	1.03989	4.68504	-0.895	39.9528	0	-0.894	52.8184	35.9447	69.9469
-0.894	0	0	-0.893	2.75121	1.07537	4.72397	-0.894	39.5522	0	-0.893	52.5491	35.7259	69.5952
-0.893	0	0	-0.892	2.79211	1.10646	4.76831	-0.893	39.1518	0	-0.892	52.2694	35.4995	69.2306
-0.892	0	0	-0.891	2.8334	1.12644	4.80191	-0.892	38.752	0	-0.891	51.9793	35.2657	68.7809
-0.891	0	0	-0.89	2.87505	1.14688	4.85822	-0.891	38.3533	0	-0.89	51.6791	35.0247	68.2654
-0.89	0	0	-0.889	2.91719	1.16785	4.90608	-0.89	37.9559	0	-0.889	51.3693	34.6678	67.7758
-0.889	0	0	-0.888	2.95995	1.18942	4.95929	-0.889	37.5604	0	-0.888	51.0501	34.3032	67.3588
-0.888	0	0	-0.887	3.00329	1.20894	5.02035	-0.888	37.1646	0	-0.887	50.7217	33.9328	66.9788
-0.887	0	0	-0.886	3.04717	1.23936	5.09201	-0.887	36.7666	0	-0.886	50.3843	33.6175	66.6013
-0.886	0	0	-0.885	3.09154	1.28053	5.16028	-0.886	36.3666	0	-0.885	50.0383	33.3639	66.2175
-0.885	0	0	-0.884	3.13619	1.32211	5.21314	-0.885	35.9652	0	-0.884	49.6841	33.1686	65.7341
-0.884	0	0	-0.883	3.1809	1.36106	5.27773	-0.884	35.5626	0	-0.883	49.3219	32.994	65.1492
-0.883	0	0	-0.882	3.22563	1.39807	5.3338	-0.883	35.1593	0	-0.882	48.952	32.7654	64.6801
-0.882	0	0	-0.881	3.27016	1.42965	5.38866	-0.882	34.7557	0	-0.881	48.5748	32.579	64.2393
-0.881	0	0	-0.88	3.31427	1.46122	5.44225	-0.881	34.3521	0	-0.88	48.1907	32.42	63.8031
-0.88	0	0	-0.879	3.35792	1.49275	5.49654	-0.88	33.9491	0	-0.879	47.8001	32.1339	63.3739
-0.879	0	0	-0.878	3.40107	1.52422	5.55568	-0.879	33.5468	0	-0.878	47.4034	31.8251	62.9668
-0.878	0	0	-0.877	3.44367	1.55492	5.62718	-0.878	33.1459	0	-0.877	47.0011	31.4577	62.5032
-0.877	0	0	-0.876	3.48568	1.57568	5.67648	-0.877	32.7465	0	-0.876	46.5933	31.1246	62.021
-0.876	0	0	-0.875	3.52707	1.59121	5.69688	-0.876	32.3492	0	-0.875	46.1804	30.7894	61.5297
-0.875	0	0	-0.874	3.56779	1.61756	5.7325	-0.875	31.9543	0	-0.874	45.7628	30.445	61.1321
-0.874	0	0	-0.873	3.6078	1.64654	5.79561	-0.874	31.5623	0	-0.873	45.3408	30.0766	60.6542
-0.873	0	0	-0.872	3.64706	1.68332	5.8606	-0.873	31.1734	0	-0.872	44.9148	29.7169	60.1103
-0.872	0	0	-0.871	3.68554	1.70571	5.92679	-0.872	30.788	0	-0.871	44.4851	29.3544	59.5043
-0.871	0	0	-0.87	3.72319	1.72202	5.96568	-0.871	30.4067	0	-0.87	44.0521	28.9234	58.9998
-0.87	0	0	-0.869	3.75998	1.73804	5.99582	-0.87	30.0296	0	-0.869	43.6159	28.6049	58.5232
-0.869	0	0	-0.868	3.79588	1.75374	6.04513	-0.869	29.6572	0	-0.868	43.1764	28.2934	58.0328
-0.868	0	0	-0.867	3.83085	1.76913	6.09277	-0.868	29.2899	0	-0.867	42.7339	27.9903	57.5283
-0.867	0	0	-0.866	3.86485	1.7937	6.15649	-0.867	28.928	0	-0.866	42.2891	27.7502	56.8962
-0.866	0	0	-0.865	3.89785	1.81628	6.20961	-0.866	28.5719	0	-0.865	41.8425	27.4116	56.4379
-0.865	0	0	-0.864	3.92982	1.83203	6.24319	-0.865	28.2218	0	-0.864	41.3938	27.0751	55.9449
-0.864	0	0	-0.863	3.96073	1.8386	6.27907	-0.864	27.8758	0	-0.863	40.9432	26.7407	55.5051
-0.863	0	0	-0.862	3.99055	1.84691	6.32042	-0.863	27.5317	0	-0.862	40.4911	26.4086	55.086
-0.862	0	0	-0.861	4.01925	1.87948	6.36059	-0.862	27.1899	0	-0.861	40.038	26.0914	54.6311
-0.861	0	0	-0.86	4.04679	1.91498	6.38573	-0.861	26.8507	0	-0.86	39.5844	25.7982	54.1218
-0.86	0	0	-0.859	4.07316	1.93352	6.40491	-0.86	26.5144	0	-0.859	39.1306	25.414	53.5848
-0.859	0	0	-0.858	4.09833	1.93251	6.44256	-0.859	26.1814	0	-0.858	38.6766	25.0324	53.0428
-0.858	0	0	-0.857	4.12227	1.94316	6.47646	-0.858	25.8519	0	-0.857	38.2221	24.6533	52.4953
-0.857	0	0	-0.856	4.14497	1.9706	6.51619	-0.857	25.5264	0	-0.856	37.7676	24.2771	51.9427
-0.856	0	0	-0.855	4.16656	1.98571	6.55701	-0.856	25.2051	0	-0.855	37.3143	23.9044	51.3861
-0.855	0	0	-0.854	4.18721	2.00045	6.56629	-0.855	24.8907	0	-0.854	36.8628	23.5354	50.8267
-0.854	0	0	-0.853	4.20689	2.0188	6.57467	-0.854	24.5861	0	-0.853	36.4137	23.1419	50.265
-0.853	0	0	-0.852	4.22558	2.04233	6.59542	-0.853	24.2915	0	-0.852	35.9676	22.8162	49.7015
-0.852	0	0	-0.851	4.24327	2.06463	6.61852	-0.852	24.0071	0	-0.851	35.5246	22.4984	49.1372
-0.851	0	0	-0.85	4.25994	2.06877	6.64549	-0.851	23.7309	0	-0.85	35.0852	22.2487	48.5723
-0.85	0	0	-0.849	4.27558	2.0709	6.66121	-0.85	23.4607	0	-0.849	34.6498	22.0267	48.0078
-0.849	0	0	-0.848	4.29016	2.06503	6.6902	-0.849	23.1967	0	-0.848	34.2192	21.8084	47.4395
-0.848	0	0	-0.847	4.30367	2.06816	6.7163	-0.848	22.9393	0	-0.847	33.794	21.6042	46.8078
-0.847	0	0	-0.846	4.31611	2.0754	6.74033	-0.847	22.691	0	-0.846	33.375	21.3401	46.1781
-0.846	0	0	-0.845	4.32745	2.0913	6.77014	-0.846	22.4546	0	-0.845	32.9623	21.0903	45.6181
-0.845	0	0	-0.844	4.33769	2.11198	6.77061	-0.845	22.2302	0	-0.844	32.5559	20.7535	45.0857
-0.844	0	0	-0.843	4.34681	2.11047	6.79341	-0.844	22.0182	0	-0.843	32.1562	20.4207	44.555
-0.843	0	0	-0.842	4.35481	2.12449	6.80959	-0.843	21.8186	0	-0.842	31.7635	20.0922	44.0269
-0.842	0	0	-0.841	4.36169	2.14188	6.82536	-0.842	21.6318	0	-0.841	31.378	19.7682	43.4987
-0.841	0	0	-0.84	4.36742	2.14849	6.83863	-0.841	21.4579	0	-0.84	31	19.5165	42.93
-0.84	0	0	-0.839	4.37202	2.15656	6.83825	-0.84	21.2971	0	-0.839	30.6299	19.2955	42.452
-0.839	0	0	-0.838	4.37564	2.16402	6.83487	-0.839	21.1494	0	-0.838	30.2682	19.0795	41.9247
-0.838	0	0	-0.837	4.37846	2.16532	6.83611	-0.838	21.0151	0	-0.837	29.9155	18.8684	41.4329
-0.837	0	0	-0.836	4.38047	2.17023	6.83968	-0.837	20.8944	0	-0.836	29.5721	18.6623	40.9456
-0.836	0	0	-0.835	4.38167	2.17052	6.83744	-0.836	20.7872	0	-0.835	29.2382	18.4614	40.4715
-0.835	0	0	-0.834	4.38207	2.17511	6.8187	-0.835	20.6937	0	-0.834	28.9138	18.2822	40.0234
-0.834	0	0	-0.833	4.38165	2.1822	6.79509	-0.834	20.6141	0	-0.833	28.5993	18.0684	39.6569
-0.833	0	0	-0.832	4.38043	2.19791	6.8033	-0.833	20.5483	0	-0.832	28.2953	17.8597	39.2301
-0.832	0	0	-0.831	4.3784	2.20381	6.81611	-0.832	20.4941	0	-0.831	28.0023	17.6344	38.8136
-0.831	0	0	-0.83	4.37556	2.22471	6.81949	-0.831	20.449	0	-0.83	27.7203	17.4519	38.4138
-0.83	0	0	-0.829	4.37192	2.23152	6.79588	-0.83	20.4131	0	-0.829	27.4491	17.3061	38.1116
-0.829	0	0	-0.828	4.36748	2.22615	6.77226	-0.829	20.3864	0	-0.828	27.1885	17.169	37.7505
-0.828	0	0	-0.827	4.36224	2.20788	6.74427	-0.828	20.3689	0	-0.827	26.9385	17.0172	37.4883
-0.827	0	0	-0.826	4.35622	2.19006	6.69884	-0.827	20.3608	0	-0.826	26.6988	16.7935	37.212
-0.826	0	0	-0.825	4.34941	2.18614	6.66053	-0.826	20.3619	0	-0.825	26.4699	16.5772	36.9214
-0.825	0	0	-0.824	4.34182	2.19447	6.65877	-0.825	20.3722	0	-0.824	26.2522	16.4194	36.7384
-0.824	0	0	-0.823	4.33346	2.19036	6.64134	-0.824	20.3919	0	-0.823	26.0454	16.3337	36.4627
-0.823	0	0	-0.822	4.32435	2.18276	6.61021	-0.823	20.4207	0	-0.822	25.8488	16.2643	36.0847
-0.822	0	0	-0.821	4.31447	2.17598	6.5758	-0.822	20.4588	0	-0.821	25.6628	16.1541	35.8259
-0.821	0	0	-0.82	4.30386	2.16842	6.52986	-0.821	20.5061	0	-0.82	25.4874	16.0787	35.6142
-0.82	0	0	-0.819	4.29251	2.16326	6.489	-0.82	20.5625	0	-0.819	25.3231	15.9076	35.415
-0.819	0	0	-0.818	4.28044	2.17001	6.47675	-0.819	20.6279	0	-0.818	25.1702	15.8207	35.2093
-0.818	0	0	-0.817	4.26766	2.17239	6.46199	-0.818	20.7024	0	-0.817	25.0288	15.8422	35.0747
-0.817	0	0	-0.816	4.25418	2.17159	6.42234	-0.817	20.7883	0	-0.816	24.899	15.793	35.0005
-0.816	0	0	-0.815	4.24002	2.1684	6.38918	-0.816	20.8878	0	-0.815	24.7808	15.5976	34.9659
-0.815	0	0	-0.814	4.22519	2.16227	6.375	-0.815	20.9986	0	-0.814	24.6742	15.4289	34.8022
-0.814	0	0	-0.813	4.20987	2.15138	6.34618	-0.814	21.118	0	-0.813	24.5793	15.2716	34.5478
-0.813	0	0	-0.812	4.19426	2.14038	6.31515	-0.813	21.2459	0	-0.812	24.4959	15.0951	34.4198
-0.812	0	0	-0.811	4.1782	2.13374	6.28194	-0.812	21.3822	0	-0.811	24.4236	14.9692	34.3329
-0.811	0	0	-0.81	4.16153	2.12845	6.22766	-0.811	21.5269	0	-0.81	24.3621	14.8031	34.411
-0.81	0	0	-0.809	4.14426	2.12496	6.17905	-0.81	21.6796	0	-0.809	24.3109	14.7163	34.4936
-0.809	0	0	-0.808	4.12642	2.11754	6.14757	-0.809	21.8403	0	-0.808	24.27	14.6767	34.6247
-0.808	0	0	-0.807	4.10802	2.11794	6.12858	-0.808	22.0089	0	-0.807	24.2391	14.6649	34.7294
-0.807	0	0	-0.806	4.08907	2.1028	6.13937	-0.807	22.1827	0	-0.806	24.2177	14.5688	34.7521
-0.806	0	0	-0.805	4.0696	2.08997	6.12257	-0.806	22.3591	0	-0.805	24.2056	14.392	34.7332
-0.805	0	0	-0.804	4.04963	2.06855	6.07013	-0.805	22.538	0	-0.804	24.2028	14.388	34.7693
-0.804	0	0	-0.803	4.02935	2.06369	6.03604	-0.804	22.7192	0	-0.803	24.2091	14.3255	35.0494
-0.803	0	0	-0.802	4.00895	2.06039	6.01015	-0.803	22.9024	0	-0.802	24.2243	14.1907	35.2292
-0.802	0	0	-0.801	3.98845	2.06989	5.99934	-0.802	23.0876	0	-0.801	24.2481	14.0456	35.4224
-0.801	0	0	-0.8	3.96788	2.06779	5.97293	-0.801	23.2746	0	-0.8	24.2806	13.9307	35.5209
-0.8	0	0	-0.799	3.94724	2.04097	5.93158	-0.8	23.4631	0	-0.799	24.3214	13.8702	35.586
-0.799	0	0	-0.798	3.92657	2.02222	5.87966	-0.799	23.653	0	-0.798	24.3703	13.8128	35.8592
-0.798	0	0	-0.797	3.90588	2.00866	5.84788	-0.798	23.8441	0	-0.797	24.4269	13.7582	36.0263
-0.797	0	0	-0.796	3.8852	1.99612	5.81668	-0.797	24.0362	0	-0.796	24.4904	13.732	36.1311
-0.796	0	0	-0.795	3.86454	1.98493	5.78501	-0.796	24.2291	0	-0.795	24.5607	13.6307	36.2806
-0.795	0	0	-0.794	3.84392	1.97274	5.7529	-0.795	24.4226	0	-0.794	24.6373	13.5202	36.5164
-0.794	0	0	-0.793	3.82337	1.97409	5.71555	-0.794	24.6166	0	-0.793	24.7196	13.3899	36.7581
-0.793	0	0	-0.792	3.8029	1.96855	5.70966	-0.793	24.8108	0	-0.792	24.8072	13.2771	37.0056
-0.792	0.00243056	0	-0.791	3.7827	1.94314	5.66397	-0.792	25.0052	0	-0.791	24.9001	13.169	37.3117
-0.791	0.00971986	0	-0.79	3.76298	1.9396	5.62017	-0.791	25.1993	0	-0.79	24.998	13.1273	37.5999
-0.79	0.0218608	0	-0.789	3.74375	1.94048	5.61792	-0.79	25.3932	0	-0.789	25.1006	13.1067	37.7804
-0.789	0.0388415	0	-0.788	3.72503	1.93953	5.60307	-0.789	25.5865	0	-0.788	25.2077	13.0519	37.9188
-0.788	0.0606453	0	-0.787	3.70683	1.94291	5.57205	-0.788	25.7792	0	-0.787	25.319	12.9849	38.149
-0.787	0.087251	0	-0.786	3.68918	1.94108	5.54392	-0.787	25.971	0	-0.786	25.4346	12.9465	38.4158
-0.786	0.118633	0	-0.785	3.67226	1.94111	5.50828	-0.786	26.1617	0	-0.785	25.5546	12.9489	38.7372
-0.785	0.154759	0	-0.784	3.65627	1.93431	5.48594	-0.785	26.3511	0	-0.784	25.6791	12.9555	39.0512
-0.784	0.195596	0	-0.783	3.64122	1.93127	5.46485	-0.784	26.5392	0	-0.783	25.8076	12.9665	39.3862
-0.783	0.241103	0	-0.782	3.62713	1.92674	5.46412	-0.783	26.7255	0	-0.782	25.9398	12.937	39.7263
-0.782	0.291235	0	-0.781	3.614	1.92406	5.48225	-0.782	26.9101	0	-0.781	26.0754	12.8972	40.0615
-0.781	0.345944	0	-0.78	3.60186	1.92732	5.47083	-0.781	27.0927	0	-0.78	26.2143	12.8589	40.3694
-0.78	0.405176	0	-0.779	3.59072	1.91118	5.45614	-0.78	27.2731	0	-0.779	26.3566	12.8445	40.667
-0.779	0.468873	0	-0.778	3.58058	1.88795	5.45607	-0.779	27.4512	0	-0.778	26.5018	12.7977	40.9542
-0.778	0.536973	0	-0.777	3.57128	1.87556	5.45618	-0.778	27.6268	0	-0.777	26.6494	12.7984	41.2497
-0.777	0.609409	0	-0.776	3.56266	1.85907	5.45475	-0.777	27.7997	0	-0.776	26.7989	12.8131	41.6173
-0.776	0.686112	0	-0.775	3.55472	1.86552	5.44685	-0.776	27.9697	0	-0.775	26.9502	12.8085	41.9845
-0.775	0.767005	0	-0.774	3.54748	1.86903	5.44818	-0.775	28.1367	0	-0.774	27.1032	12.784	42.3982
-0.774	0.852009	0	-0.773	3.54094	1.84713	5.45073	-0.774	28.3005	0	-0.773	27.2579	12.7488	42.7914
-0.773	0.941043	0	-0.772	3.5351	1.828	5.46954	-0.773	28.4609	0	-0.772	27.4141	12.7372	43.0278
-0.772	1.03402	0	-0.771	3.52998	1.81885	5.46972	-0.772	28.6179	0	-0.771	27.5716	12.7592	43.3087
-0.771	1.13084	0	-0.77	3.52558	1.79464	5.46147	-0.771	28.7712	0	-0.77	27.7305	12.7845	43.5857
-0.77	1.23143	0	-0.769	3.52189	1.77741	5.46211	-0.77	28.9231	0	-0.769	27.8906	12.8134	43.8769
-0.769	1.33566	0	-0.768	3.51894	1.76612	5.46588	-0.769	29.076	0	-0.768	28.0516	12.865	44.1876
-0.768	1.44346	0	-0.767	3.51671	1.75868	5.47375	-0.768	29.2296	0	-0.767	28.2133	12.9277	44.4956
-0.767	1.55471	0	-0.766	3.51521	1.73291	5.50543	-0.767	29.3838	0	-0.766	28.3757	12.9875	44.8221
-0.766	1.6693	0	-0.765	3.51444	1.72454	5.5344	-0.766	29.5384	0	-0.765	28.5387	13.0475	45.2534
-0.765	1.78711	0	-0.764	3.51441	1.72193	5.57847	-0.765	29.6934	0	-0.764	28.7019	13.1223	45.6575
-0.764	1.90805	0	-0.763	3.51511	1.71817	5.59412	-0.764	29.8461	0	-0.763	28.8654	13.2169	46.0592
-0.763	2.03198	0	-0.762	3.51654	1.71984	5.61631	-0.763	29.9939	0	-0.762	29.0292	13.3149	46.3975
-0.762	2.15879	0	-0.761	3.5187	1.69528	5.64027	-0.762	30.1367	0	-0.761	29.193	13.3927	46.7143
-0.761	2.28834	0	-0.76	3.52159	1.65701	5.66916	-0.761	30.2744	0	-0.76	29.3565	13.436	47.0802
-0.76	2.42053	0	-0.759	3.52521	1.64485	5.70584	-0.76	30.4068	0	-0.759	29.5191	13.4084	47.4244
-0.759	2.55521	0	-0.758	3.52955	1.6422	5.73053	-0.759	30.5338	0	-0.758	29.6804	13.4226	47.693
-0.758	2.69225	0	-0.757	3.5346	1.6368	5.72855	-0.758	30.6553	0	-0.757	29.8401	13.4456	47.9559
-0.757	2.83152	0	-0.756	3.54037	1.64056	5.72045	-0.757	30.7711	0	-0.756	29.9983	13.4708	48.2776
-0.756	2.97289	0	-0.755	3.54685	1.62306	5.72396	-0.756	30.8812	0	-0.755	30.155	13.4769	48.6369
-0.755	3.11622	0	-0.754	3.55403	1.59903	5.7395	-0.755	30.9854	0	-0.754	30.3102	13.5209	48.9978
-0.754	3.26136	0	-0.753	3.5619	1.5873	5.74873	-0.754	31.086	0	-0.753	30.4638	13.5785	49.3959
-0.753	3.40817	0	-0.752	3.57046	1.58178	5.77098	-0.753	31.1855	0	-0.752	30.6158	13.638	49.7976
-0.752	3.55652	0	-0.751	3.57969	1.60491	5.79642	-0.752	31.2836	0	-0.751	30.7659	13.6992	50.1935
-0.751	3.70625	0	-0.75	3.58943	1.62623	5.83337	-0.751	31.3804	0	-0.75	30.914	13.7744	50.5363
-0.75	3.85723	0	-0.749	3.5993	1.62522	5.85722	-0.75	31.4757	0	-0.749	31.0602	13.8379	50.8627
-0.749	4.00929	0	-0.748	3.60912	1.62658	5.87303	-0.749	31.5693	0	-0.748	31.2042	13.8941	51.1828
-0.748	4.1623	0	-0.747	3.6189	1.64787	5.89036	-0.748	31.6613	0	-0.747	31.3457	13.9627	51.496
-0.747	4.3161	0	-0.746	3.6286	1.67387	5.9195	-0.747	31.7515	0	-0.746	31.4841	14.0327	51.8015
-0.746	4.47055	0	-0.745	3.63824	1.671	5.96567	-0.746	31.8399	0	-0.745	31.6192	14.1042	52.0988
-0.745	4.62549	0	-0.744	3.64779	1.65019	5.99446	-0.745	31.9263	0	-0.744	31.7509	14.1313	52.3629
-0.744	4.78077	0	-0.743	3.65725	1.63452	5.99601	-0.744	32.0107	0	-0.743	31.8789	14.1436	52.6045
-0.743	4.93624	0	-0.742	3.66661	1.61706	6.01885	-0.743	32.093	0	-0.742	32.0034	14.168	52.8367
-0.742	5.09175	0	-0.741	3.67586	1.61098	6.03129	-0.742	32.1755	0	-0.741	32.1244	14.2063	53.0904
-0.741	5.24715	0	-0.74	3.68499	1.60374	6.04288	-0.741	32.2606	0	-0.74	32.2418	14.2475	53.3158
-0.74	5.40228	0	-0.739	3.69399	1.59718	6.04335	-0.74	32.3482	0	-0.739	32.3555	14.2914	53.504
-0.739	5.55699	0	-0.738	3.70285	1.59542	6.04203	-0.739	32.4383	0	-0.738	32.465	14.3377	53.7312
-0.738	5.71114	0	-0.737	3.71157	1.59823	6.06882	-0.738	32.5306	0	-0.737	32.5696	14.386	53.9471
-0.737	5.86456	0	-0.736	3.72014	1.60402	6.09565	-0.737	32.6253	0	-0.736	32.6694	14.4362	54.1515
-0.736	6.01712	0	-0.735	3.72854	1.60332	6.11333	-0.736	32.722	0	-0.735	32.7641	14.5174	54.3443
-0.735	6.16865	0	-0.734	3.73659	1.61655	6.13655	-0.735	32.8208	0	-0.734	32.8536	14.6287	54.5251
-0.734	6.31902	0	-0.733	3.74412	1.62112	6.13757	-0.734	32.9216	0	-0.733	32.9377	14.741	54.6786
-0.733	6.46808	0	-0.732	3.75112	1.63077	6.15636	-0.733	33.0243	0	-0.732	33.0164	14.8504	54.7012
-0.732	6.61568	0	-0.731	3.75775	1.64108	6.18053	-0.732	33.1287	0	-0.731	33.0895	14.8901	54.7577
-0.731	6.76168	0	-0.73	3.76418	1.65222	6.18683	-0.731	33.2347	0	-0.73	33.1569	14.9287	54.9227
-0.73	6.90593	0	-0.729	3.77041	1.66157	6.19403	-0.73	33.3423	0	-0.729	33.2181	15.0091	55.0777
-0.729	7.04829	0	-0.728	3.7766	1.67118	6.18618	-0.729	33.4514	0	-0.728	33.273	15.1269	55.2226
-0.728	7.18863	0	-0.727	3.78291	1.68567	6.18735	-0.728	33.5618	0	-0.727	33.3219	15.2442	55.3573
-0.727	7.32681	0	-0.726	3.78935	1.69817	6.2138	-0.727	33.6734	0	-0.726	33.3647	15.3608	55.4822
-0.726	7.46269	0	-0.725	3.79609	1.71257	6.23956	-0.726	33.7862	0	-0.725	33.4018	15.4766	55.5976
-0.725	7.59613	0	-0.724	3.80327	1.72755	6.24912	-0.725	33.9	0	-0.724	33.4332	15.5915	55.7033
-0.724	7.72702	0	-0.723	3.81091	1.73256	6.27124	-0.724	34.0147	0	-0.723	33.4587	15.7055	55.7787
-0.723	7.85522	0	-0.722	3.81899	1.74152	6.26495	-0.723	34.1301	0	-0.722	33.4783	15.7976	55.8001
-0.722	7.9806	0	-0.721	3.82751	1.72602	6.26046	-0.722	34.2463	0	-0.721	33.4918	15.8578	55.811
-0.721	8.10305	0	-0.72	3.83646	1.71647	6.2787	-0.721	34.363	0	-0.72	33.4994	15.886	55.8115
-0.72	8.22244	0	-0.719	3.84582	1.71219	6.29517	-0.72	34.4802	0	-0.719	33.5011	15.9126	55.8019
-0.719	8.33866	0	-0.718	3.85559	1.70194	6.30854	-0.719	34.5977	0	-0.718	33.4975	15.9379	55.7834
-0.718	8.45159	0	-0.717	3.86559	1.6941	6.31352	-0.718	34.7155	0	-0.717	33.489	15.9623	55.757
-0.717	8.56112	0	-0.716	3.87563	1.70052	6.31654	-0.717	34.8333	0	-0.716	33.4757	15.9856	55.7227
-0.716	8.66715	0	-0.715	3.8857	1.70269	6.32199	-0.716	34.9511	0	-0.715	33.458	16.0667	55.6815
-0.715	8.76958	0	-0.714	3.89597	1.69449	6.32744	-0.715	35.0689	0	-0.714	33.4361	16.1967	55.6337
-0.714	8.86829	0	-0.713	3.90659	1.68742	6.33214	-0.714	35.1863	0	-0.713	33.41	16.2534	55.5795
-0.713	8.96321	0	-0.712	3.91757	1.68228	6.33904	-0.713	35.3035	0	-0.712	33.3796	16.2978	55.5188
-0.712	9.05422	0	-0.711	3.92889	1.67915	6.36004	-0.712	35.4177	0	-0.711	33.3444	16.2845	55.4515
-0.711	9.14125	0	-0.71	3.94053	1.69526	6.38213	-0.711	35.5265	0	-0.71	33.3047	16.2451	55.3762
-0.71	9.22421	0	-0.709	3.9525	1.70396	6.40732	-0.71	35.6321	0	-0.709	33.2605	16.2293	55.2499
-0.709	9.30302	0	-0.708	3.96476	1.71016	6.43231	-0.709	35.737	0	-0.708	33.2118	16.2141	55.1157
-0.708	9.3776	0	-0.707	3.97732	1.7273	6.46274	-0.708	35.841	0	-0.707	33.1584	16.1979	54.9735
-0.707	9.44787	0	-0.706	3.99016	1.75148	6.49527	-0.707	35.944	0	-0.706	33.1004	16.1809	54.8234
-0.706	9.51378	0	-0.705	4.00327	1.75584	6.52683	-0.706	36.046	0	-0.705	33.038	16.1756	54.6659
-0.705	9.57525	0	-0.704	4.0168	1.76326	6.5512	-0.705	36.1467	0	-0.704	32.9715	16.2363	54.5012
-0.704	9.63223	0	-0.703	4.03093	1.77295	6.56801	-0.704	36.2461	0	-0.703	32.9012	16.3538	54.3595
-0.703	9.68466	0	-0.702	4.04563	1.78394	6.58021	-0.703	36.3441	0	-0.702	32.8277	16.4556	54.2653
-0.702	9.73248	0	-0.701	4.06089	1.79509	6.60567	-0.702	36.4407	0	-0.701	32.7515	16.5874	54.1663
-0.701	9.77566	0	-0.7	4.0767	1.8064	6.63145	-0.701	36.5357	0	-0.7	32.6729	16.7042	54.0487
-0.7	9.81414	0	-0.699	4.09303	1.81785	6.65535	-0.7	36.629	0	-0.699	32.592	16.7581	53.8834
-0.699	9.8479	0	-0.698	4.10989	1.82944	6.65646	-0.699	36.723	0	-0.698	32.5091	16.7704	53.7099
-0.698	9.8769	0	-0.697	4.12724	1.8364	6.68132	-0.698	36.82	0	-0.697	32.4244	16.8716	53.5327
-0.697	9.90111	0	-0.696	4.14507	1.83488	6.6841	-0.697	36.9199	0	-0.696	32.3384	16.9334	53.4231
-0.696	9.9205	0	-0.695	4.16337	1.8395	6.69543	-0.696	37.0226	0	-0.695	32.2512	17.0094	53.3163
-0.695	9.93506	0	-0.694	4.18228	1.83562	6.74182	-0.695	37.1304	0	-0.694	32.1635	17.0896	53.1749
-0.694	9.94478	0	-0.693	4.20197	1.82758	6.76405	-0.694	37.2458	0	-0.693	32.0752	17.0652	52.987
-0.693	9.94964	0	-0.692	4.22259	1.82502	6.78483	-0.693	37.3684	0	-0.692	31.9865	17.0217	52.7943
-0.692	9.94964	0	-0.691	4.24429	1.82302	6.82172	-0.692	37.4984	0	-0.691	31.8976	17.0136	52.6515
-0.691	9.94478	0	-0.69	4.26706	1.81031	6.87357	-0.691	37.6354	0	-0.69	31.809	17.0115	52.5654
-0.69	9.93506	0	-0.689	4.29086	1.79739	6.92719	-0.69	37.7794	0	-0.689	31.7205	17.0101	52.4432
-0.689	9.9205	0	-0.688	4.3155	1.78419	6.9913	-0.689	37.9303	0	-0.688	31.632	17.0816	52.2799
-0.688	9.90111	0	-0.687	4.34079	1.77774	7.05739	-0.688	38.0878	0	-0.687	31.5434	17.0342	52.1138
-0.687	9.8769	0	-0.686	4.3667	1.77379	7.10856	-0.687	38.2519	0	-0.686	31.4551	17.0524	51.9715
-0.686	9.8479	0	-0.685	4.3932	1.75829	7.17948	-0.686	38.4223	0	-0.685	31.3673	17.089	51.7748
-0.685	9.81414	0	-0.684	4.42027	1.76625	7.25946	-0.685	38.599	0	-0.684	31.2802	17.0104	51.6025
-0.684	9.77566	0	-0.683	4.44789	1.74861	7.30849	-0.684	38.7817	0	-0.683	31.1938	17.0334	51.4289
-0.683	9.73248	0	-0.682	4.47602	1.73169	7.38339	-0.683	38.9702	0	-0.682	31.1085	17.0941	51.2537
-0.682	9.68466	0	-0.681	4.50463	1.71552	7.47707	-0.682	39.1645	0	-0.681	31.0239	17.1451	51.0768
-0.681	9.63223	0	-0.68	4.53371	1.71944	7.54963	-0.681	39.3642	0	-0.68	30.9402	17.1043	50.8982
-0.68	9.57525	0	-0.679	4.56322	1.7052	7.58132	-0.68	39.5692	0	-0.679	30.8573	17.0832	50.7185
-0.679	9.51378	0	-0.678	4.59313	1.70072	7.6252	-0.679	39.7792	0	-0.678	30.7756	17.053	50.5799
-0.678	9.44787	0	-0.677	4.62358	1.69322	7.67706	-0.678	39.9942	0	-0.677	30.6954	16.9688	50.4615
-0.677	9.3776	0	-0.676	4.65473	1.72639	7.73937	-0.677	40.2138	0	-0.676	30.6163	16.9041	50.3831
-0.676	9.30302	0	-0.675	4.68654	1.7464	7.79728	-0.676	40.4379	0	-0.675	30.5386	16.8614	50.2356
-0.675	9.22421	0	-0.674	4.71898	1.75314	7.85972	-0.675	40.6663	0	-0.674	30.4622	16.828	50.1064
-0.674	9.14125	0	-0.673	4.75201	1.75045	7.93121	-0.674	40.8986	0	-0.673	30.3869	16.7643	49.9289
-0.673	9.05422	0	-0.672	4.78561	1.74317	7.97296	-0.673	41.1347	0	-0.672	30.3129	16.7385	49.7252
-0.672	8.96321	0	-0.671	4.81974	1.73096	8.02078	-0.672	41.3744	0	-0.671	30.2406	16.706	49.5249
-0.671	8.86829	0	-0.67	4.85437	1.7195	8.10523	-0.671	41.6175	0	-0.67	30.1699	16.663	49.3278
-0.67	8.76958	0	-0.669	4.88947	1.70878	8.18768	-0.67	41.8636	0	-0.669	30.1007	16.5886	49.1674
-0.669	8.66715	0	-0.668	4.925	1.69883	8.28603	-0.669	42.1125	0	-0.668	30.0334	16.4952	49.0159
-0.668	8.56112	0	-0.667	4.96092	1.70014	8.40615	-0.668	42.3641	0	-0.667	29.9679	16.5348	48.8098
-0.667	8.45159	0	-0.666	4.99721	1.70401	8.51006	-0.667	42.618	0	-0.666	29.9045	16.4991	48.5795
-0.666	8.33866	0	-0.665	5.03382	1.70081	8.61907	-0.666	42.874	0	-0.665	29.8429	16.4073	48.4569
-0.665	8.22244	0	-0.664	5.07072	1.7085	8.7291	-0.665	43.1319	0	-0.664	29.7828	16.2904	48.2848
-0.664	8.10305	0	-0.663	5.10787	1.71234	8.82459	-0.664	43.3914	0	-0.663	29.7243	16.2189	48.0681
-0.663	7.9806	0	-0.662	5.14524	1.70328	8.9198	-0.663	43.6522	0	-0.662	29.6676	16.1878	47.9777
-0.662	7.85522	0	-0.661	5.1828	1.69611	9.0092	-0.662	43.9141	0	-0.661	29.6131	16.1585	47.9259
-0.661	7.72702	0	-0.66	5.22049	1.69953	9.09966	-0.661	44.1769	0	-0.66	29.5608	16.0463	47.8098
-0.66	7.59613	0	-0.659	5.2583	1.69685	9.20531	-0.66	44.4403	0	-0.659	29.5105	16.0571	47.6607
-0.659	7.46269	0	-0.658	5.29617	1.72127	9.32125	-0.659	44.704	0	-0.658	29.4624	16.1129	47.5921
-0.658	7.32681	0	-0.657	5.33408	1.73923	9.43659	-0.658	44.9677	0	-0.657	29.417	16.133	47.5241
-0.657	7.18863	0	-0.656	5.37198	1.7366	9.55122	-0.657	45.2313	0	-0.656	29.3745	16.163	47.4571
-0.656	7.04829	0	-0.655	5.40985	1.73504	9.65506	-0.656	45.4944	0	-0.655	29.3346	16.1703	47.339
-0.655	6.90593	0	-0.654	5.44746	1.73448	9.76131	-0.655	45.7568	0	-0.654	29.2969	16.1406	47.1534
-0.654	6.76168	0	-0.653	5.48461	1.73483	9.83383	-0.654	46.0159	0	-0.653	29.2607	16.1009	46.9954
-0.653	6.61568	0	-0.652	5.52127	1.748	9.86523	-0.653	46.2689	0	-0.652	29.2261	16.0829	46.8244
-0.652	6.46808	0	-0.651	5.55756	1.77057	9.91749	-0.652	46.5155	0	-0.651	29.193	16.071	46.607
-0.651	6.31902	0	-0.65	5.59363	1.79402	9.98143	-0.651	46.7556	0	-0.65	29.1614	16.0621	46.4219
-0.65	6.16865	0	-0.649	5.62945	1.82319	10.0763	-0.65	46.9913	0	-0.649	29.1316	16.0561	46.3194
-0.649	6.01712	0	-0.648	5.66497	1.82085	10.1933	-0.649	47.2249	0	-0.648	29.1035	16.0898	46.185
-0.648	5.86456	0	-0.647	5.70034	1.8186	10.3095	-0.648	47.456	0	-0.647	29.0771	16.0569	46.0643
-0.647	5.71114	0	-0.646	5.7357	1.81539	10.4248	-0.647	47.6846	0	-0.646	29.0524	16.0163	45.9527
-0.646	5.55699	0	-0.645	5.771	1.83943	10.5267	-0.646	47.9078	0	-0.645	29.029	15.9865	45.8402
-0.645	5.40228	0	-0.644	5.80623	1.85678	10.6522	-0.645	48.1232	0	-0.644	29.0067	15.9341	45.7267
-0.644	5.24715	0	-0.643	5.84133	1.85055	10.7523	-0.644	48.3304	0	-0.643	28.9854	15.9538	45.6124
-0.643	5.09175	0	-0.642	5.87629	1.84459	10.8387	-0.643	48.5293	0	-0.642	28.9652	15.9964	45.4972
-0.642	4.93624	0	-0.641	5.91105	1.83892	10.9232	-0.642	48.7197	0	-0.641	28.9459	16.0216	45.3179
-0.641	4.78077	0	-0.64	5.9456	1.83353	11.006	-0.641	48.9013	0	-0.64	28.9276	16.038	45.1394
-0.64	4.62549	0	-0.639	5.9799	1.82843	11.0869	-0.64	49.0741	0	-0.639	28.9102	16.0363	45.0585
-0.639	4.47055	0	-0.638	6.0139	1.82746	11.1468	-0.639	49.2378	0	-0.638	28.8938	16.0395	44.9241
-0.638	4.3161	0	-0.637	6.04742	1.83424	11.2003	-0.638	49.3922	0	-0.637	28.8784	16.0137	44.8889
-0.637	4.1623	0	-0.636	6.08023	1.83625	11.2517	-0.637	49.5373	0	-0.636	28.8635	15.9924	44.872
-0.636	4.00929	0	-0.635	6.11231	1.8471	11.3195	-0.636	49.6729	0	-0.635	28.8487	15.9571	44.8424
-0.635	3.85723	0	-0.634	6.14362	1.85841	11.4142	-0.635	49.7989	0	-0.634	28.8343	15.9244	44.8879
-0.634	3.70625	0	-0.633	6.17414	1.87016	11.4728	-0.634	49.915	0	-0.633	28.82	15.8942	44.9423
-0.633	3.55652	0	-0.632	6.20384	1.88233	11.5382	-0.633	50.0213	0	-0.632	28.8054	15.8572	44.8833
-0.632	3.40817	0	-0.631	6.23268	1.89493	11.6137	-0.632	50.1176	0	-0.631	28.7898	15.8113	44.8593
-0.631	3.26136	0	-0.63	6.26065	1.88519	11.6994	-0.631	50.2038	0	-0.63	28.7734	15.7937	44.8032
-0.63	3.11622	0	-0.629	6.2877	1.8819	11.7693	-0.63	50.2799	0	-0.629	28.7561	15.804	44.7438
-0.629	2.97289	0	-0.628	6.31382	1.88646	11.822	-0.629	50.3457	0	-0.628	28.7379	15.8408	44.6983
-0.628	2.83152	0	-0.627	6.33897	1.87762	11.9015	-0.628	50.4012	0	-0.627	28.7191	15.8225	44.8177
-0.627	2.69225	0	-0.626	6.36315	1.86657	11.98	-0.627	50.4464	0	-0.626	28.6997	15.8034	44.9319
-0.626	2.55521	0	-0.625	6.38631	1.85543	12.0174	-0.626	50.4812	0	-0.625	28.6799	15.7846	44.911
-0.625	2.42053	0	-0.624	6.40844	1.84422	12.0281	-0.625	50.5055	0	-0.624	28.6593	15.7269	44.834
-0.624	2.28834	0	-0.623	6.42952	1.83293	12.0363	-0.624	50.5193	0	-0.623	28.6374	15.7527	44.7207
-0.623	2.15879	0	-0.622	6.44952	1.8216	12.0609	-0.623	50.5227	0	-0.622	28.6142	15.7107	44.7738
-0.622	2.03198	0	-0.621	6.46843	1.81022	12.0915	-0.622	50.5181	0	-0.621	28.5899	15.6624	44.8043
-0.621	1.90805	0	-0.62	6.48623	1.80835	12.1189	-0.621	50.5078	0	-0.62	28.5642	15.6413	44.9079
-0.62	1.78711	0	-0.619	6.5029	1.80573	12.1886	-0.62	50.4919	0	-0.619	28.5369	15.5832	44.968
-0.619	1.6693	0	-0.618	6.51843	1.79875	12.2548	-0.619	50.4705	0	-0.618	28.508	15.5234	44.901
-0.618	1.55471	0	-0.617	6.53279	1.79175	12.3254	-0.618	50.4435	0	-0.617	28.4773	15.5228	44.7682
-0.617	1.44346	0	-0.616	6.54615	1.78517	12.3878	-0.617	50.4109	0	-0.616	28.4448	15.5234	44.7913
-0.616	1.33566	0	-0.615	6.55867	1.78762	12.4214	-0.616	50.3704	0	-0.615	28.4105	15.5251	44.6936
-0.615	1.23143	0	-0.614	6.57034	1.79363	12.4522	-0.615	50.3196	0	-0.614	28.3745	15.5125	44.6241
-0.614	1.13084	0	-0.613	6.58115	1.80532	12.4801	-0.614	50.2585	0	-0.613	28.3369	15.501	44.6546
-0.613	1.03402	0	-0.612	6.5909	1.80768	12.5049	-0.613	50.1872	0	-0.612	28.2974	15.5129	44.5853
-0.612	0.941043	0	-0.611	6.59943	1.81983	12.5262	-0.612	50.1058	0	-0.611	28.2558	15.5048	44.4834
-0.611	0.852009	0	-0.61	6.60671	1.8448	12.5439	-0.611	50.0142	0	-0.61	28.2119	15.4585	44.4389
-0.61	0.767005	0	-0.609	6.61275	1.8625	12.5581	-0.61	49.9127	0	-0.609	28.1658	15.3261	44.4262
-0.609	0.686112	0	-0.608	6.61753	1.88844	12.5686	-0.609	49.8013	0	-0.608	28.1176	15.1824	44.4065
-0.608	0.609409	0	-0.607	6.62106	1.89144	12.5756	-0.608	49.6802	0	-0.607	28.0672	15.0747	44.4913
-0.607	0.536973	0	-0.606	6.62333	1.90926	12.5789	-0.607	49.5494	0	-0.606	28.0147	15.002	44.4179
-0.606	0.468873	0	-0.605	6.62433	1.9103	12.5787	-0.606	49.409	0	-0.605	27.9604	14.9634	44.3428
-0.605	0.405176	0	-0.604	6.62407	1.91225	12.5748	-0.605	49.2618	0	-0.604	27.9047	14.9239	44.2661
-0.604	0.345944	0	-0.603	6.62254	1.91047	12.5673	-0.604	49.1101	0	-0.603	27.8475	14.8387	44.2706
-0.603	0.291235	0	-0.602	6.61958	1.90556	12.5562	-0.603	48.9542	0	-0.602	27.7888	14.7084	44.2697
-0.602	0.241103	0	-0.601	6.61502	1.91213	12.5423	-0.602	48.7942	0	-0.601	27.7285	14.612	44.2642
-0.601	0.195596	0	-0.6	6.60885	1.93586	12.5286	-0.601	48.6303	0	-0.6	27.6664	14.5541	44.254
-0.6	0.154759	0	-0.599	6.60108	1.93144	12.5108	-0.6	48.4626	0	-0.599	27.6027	14.4174	44.2391
-0.599	0.118633	0	-0.598	6.59172	1.92721	12.489	-0.599	48.2913	0	-0.598	27.5373	14.2922	44.2195
-0.598	0.087251	0	-0.597	6.58079	1.93421	12.4618	-0.598	48.1166	0	-0.597	27.4704	14.1999	44.1953
-0.597	0.0606453	0	-0.596	6.56829	1.94365	12.423	-0.597	47.9386	0	-0.596	27.4022	14.1077	44.0932
-0.596	0.0388415	0	-0.595	6.5544	1.95372	12.3805	-0.596	47.7575	0	-0.595	27.3329	14.0056	44.1136
-0.595	0.0218608	0	-0.594	6.53949	1.96508	12.334	-0.595	47.5735	0	-0.594	27.2625	13.8606	44.0997
-0.594	0.00971986	0	-0.593	6.52375	1.978	12.2814	-0.594	47.3868	0	-0.593	27.1914	13.7164	44.0614
-0.593	0.00243056	0	-0.592	6.50719	1.97833	12.2255	-0.593	47.1975	0	-0.592	27.1198	13.5778	43.9634
-0.592	0	0	-0.591	6.48982	1.97678	12.1663	-0.592	47.0059	0	-0.591	27.0475	13.5059	43.8703
-0.591	0	0	-0.59	6.4715	1.9759	12.1037	-0.591	46.8121	0	-0.59	26.9744	13.4047	43.7809
-0.59	0	0	-0.589	6.45206	1.98535	12.0223	-0.59	46.6163	0	-0.589	26.9002	13.3155	43.715
-0.589	0	0	-0.588	6.43153	2.00687	11.949	-0.589	46.4187	0	-0.588	26.8252	13.2283	43.7033
-0.588	0	0	-0.587	6.40992	2.02946	11.8821	-0.588	46.2194	0	-0.587	26.7498	13.1433	43.7329
-0.587	0	0	-0.586	6.38725	2.03855	11.7943	-0.587	46.0188	0	-0.586	26.6739	13.0727	43.7595
-0.586	0	0	-0.585	6.36355	2.0587	11.7248	-0.586	45.817	0	-0.585	26.5975	12.9902	43.7831
-0.585	0	0	-0.584	6.33867	2.07954	11.652	-0.585	45.6141	0	-0.584	26.5204	12.9096	43.8031
-0.584	0	0	-0.583	6.31246	2.10151	11.5713	-0.584	45.4105	0	-0.583	26.4429	12.812	43.7858
-0.583	0	0	-0.582	6.28494	2.12365	11.5003	-0.583	45.2086	0	-0.582	26.3653	12.7547	43.7519
-0.582	0	0	-0.581	6.25614	2.12646	11.4186	-0.582	45.0112	0	-0.581	26.2876	12.6849	43.6941
-0.581	0	0	-0.58	6.22609	2.13006	11.3122	-0.581	44.8184	0	-0.58	26.2101	12.6308	43.6345
-0.58	0	0	-0.579	6.19482	2.13253	11.2164	-0.58	44.6304	0	-0.579	26.1327	12.5778	43.5418
-0.579	0	0	-0.578	6.16236	2.13535	11.1394	-0.579	44.4475	0	-0.578	26.0551	12.5042	43.4355
-0.578	0	0	-0.577	6.12873	2.14785	11.0647	-0.578	44.2697	0	-0.577	25.9774	12.4115	43.3277
-0.577	0	0	-0.576	6.09398	2.17615	11.0158	-0.577	44.0973	0	-0.576	25.8996	12.3331	43.2183
-0.576	0	0	-0.575	6.05814	2.18544	10.9174	-0.576	43.9304	0	-0.575	25.8219	12.2709	43.1138
-0.575	0	0	-0.574	6.02123	2.17126	10.8026	-0.575	43.7691	0	-0.574	25.7445	12.2095	43.0694
-0.574	0	0	-0.573	5.98331	2.17507	10.7159	-0.574	43.6138	0	-0.573	25.6676	12.1488	43.022
-0.573	0	0	-0.572	5.9444	2.19271	10.6333	-0.573	43.4644	0	-0.572	25.5914	12.089	42.9716
-0.572	0	0	-0.571	5.90454	2.21492	10.5479	-0.572	43.3212	0	-0.571	25.5158	12.0303	42.9598
-0.571	0	0	-0.57	5.86377	2.23267	10.4599	-0.571	43.1842	0	-0.57	25.441	11.9507	42.9479
-0.57	0	0	-0.569	5.82214	2.23993	10.3693	-0.57	43.0537	0	-0.569	25.3669	11.8298	42.9317
-0.569	0	0	-0.568	5.77968	2.26139	10.2707	-0.569	42.9273	0	-0.568	25.2931	11.7111	42.9111
-0.568	0	0	-0.567	5.7366	2.26978	10.166	-0.568	42.8027	0	-0.567	25.2196	11.611	42.8452
-0.567	0	0	-0.566	5.69313	2.2805	10.0596	-0.567	42.68	0	-0.566	25.1465	11.5546	42.7353
-0.566	0	0	-0.565	5.64931	2.3114	9.96804	-0.566	42.5593	0	-0.565	25.0737	11.4563	42.6223
-0.565	0	0	-0.564	5.60517	2.33719	9.85463	-0.565	42.4409	0	-0.564	25.001	11.3873	42.5057
-0.564	0	0	-0.563	5.56077	2.31841	9.73767	-0.564	42.3247	0	-0.563	24.9287	11.3195	42.386
-0.563	0	0	-0.562	5.51614	2.30802	9.63102	-0.563	42.2109	0	-0.562	24.857	11.2615	42.2633
-0.562	0	0	-0.561	5.47133	2.32895	9.51707	-0.562	42.0996	0	-0.561	24.7864	11.2119	42.1379
-0.561	0	0	-0.56	5.42638	2.30705	9.4025	-0.561	41.9909	0	-0.56	24.7173	11.1248	42.0104
-0.56	0	0	-0.559	5.38133	2.27765	9.28579	-0.56	41.885	0	-0.559	24.6497	11.0424	41.9124
-0.559	0	0	-0.558	5.33624	2.26142	9.16095	-0.559	41.7819	0	-0.558	24.5837	10.9888	41.8253
-0.558	0	0	-0.557	5.29114	2.23757	9.03565	-0.558	41.6817	0	-0.557	24.5195	10.9095	41.7375
-0.557	0	0	-0.556	5.24626	2.18266	8.93009	-0.557	41.5845	0	-0.556	24.4569	10.837	41.649
-0.556	0	0	-0.555	5.20197	2.14439	8.80225	-0.556	41.4904	0	-0.555	24.396	10.8042	41.5597
-0.555	0	0	-0.554	5.15851	2.1298	8.70954	-0.555	41.3996	0	-0.554	24.3365	10.7851	41.4696
-0.554	0	0	-0.553	5.11591	2.10699	8.58773	-0.554	41.312	0	-0.553	24.2785	10.7506	41.3984
-0.553	0	0	-0.552	5.07439	2.08014	8.46091	-0.553	41.2255	0	-0.552	24.2218	10.717	41.3321
-0.552	0	0	-0.551	5.03416	2.06625	8.3396	-0.552	41.1375	0	-0.551	24.1665	10.7093	41.2642
-0.551	0	0	-0.55	4.99526	2.04437	8.28184	-0.551	41.0506	0	-0.55	24.113	10.7134	41.1676
-0.55	0	0	-0.549	4.95773	2.03893	8.17514	-0.55	40.9674	0	-0.549	24.0609	10.7221	41.0033
-0.549	0	0	-0.548	4.92178	2.02598	8.13736	-0.549	40.8879	0	-0.548	24.01	10.7351	40.9067
-0.548	0	0	-0.547	4.88762	2.02178	8.10214	-0.548	40.8122	0	-0.547	23.9604	10.6868	40.8381
-0.547	0	0	-0.546	4.85527	2.01486	8.04278	-0.547	40.7404	0	-0.546	23.9125	10.6394	40.7975
-0.546	0	0	-0.545	4.82496	1.99498	7.9722	-0.546	40.6725	0	-0.545	23.8661	10.6031	40.7838
-0.545	0	0	-0.544	4.79688	2.01993	7.86985	-0.545	40.6086	0	-0.544	23.8215	10.6	40.7878
-0.544	0	0	-0.543	4.77105	2.05376	7.77282	-0.544	40.5488	0	-0.543	23.7785	10.574	40.6921
-0.543	0	0	-0.542	4.74751	2.04853	7.75859	-0.543	40.4931	0	-0.542	23.7374	10.5585	40.5818
-0.542	0	0	-0.541	4.72627	2.08074	7.74774	-0.542	40.4417	0	-0.541	23.6978	10.5602	40.4842
-0.541	0	0	-0.54	4.70736	2.08052	7.71261	-0.541	40.392	0	-0.54	23.6598	10.5778	40.4056
-0.54	0	0	-0.539	4.69079	2.10754	7.65927	-0.54	40.3417	0	-0.539	23.6233	10.5989	40.292
-0.539	0	0	-0.538	4.67658	2.11392	7.60064	-0.539	40.2909	0	-0.538	23.5886	10.6237	40.1654
-0.538	0	0	-0.537	4.66475	2.09434	7.56573	-0.538	40.2397	0	-0.537	23.5558	10.6524	40.04
-0.537	0	0	-0.536	4.65531	2.11117	7.53105	-0.537	40.188	0	-0.536	23.5249	10.6849	39.9343
-0.536	0	0	-0.535	4.64844	2.12664	7.50158	-0.536	40.1359	0	-0.535	23.496	10.7213	39.8873
-0.535	0	0	-0.534	4.64431	2.14324	7.4811	-0.535	40.0835	0	-0.534	23.4687	10.7613	39.8228
-0.534	0	0	-0.533	4.64294	2.1686	7.51552	-0.534	40.0308	0	-0.533	23.4431	10.8051	39.7058
-0.533	0	0	-0.532	4.64433	2.1724	7.51647	-0.533	39.9779	0	-0.532	23.4191	10.8376	39.5884
-0.532	0	0	-0.531	4.64846	2.20329	7.54677	-0.532	39.9248	0	-0.531	23.3964	10.8337	39.4701
-0.531	0	0	-0.53	4.65518	2.2115	7.57883	-0.531	39.8716	0	-0.53	23.3747	10.8461	39.3508
-0.53	0	0	-0.529	4.66429	2.22851	7.63528	-0.53	39.8184	0	-0.529	23.3544	10.9128	39.3619
-0.529	0	0	-0.528	4.67579	2.22709	7.65413	-0.529	39.7651	0	-0.528	23.3355	10.8992	39.2532
-0.528	0	0	-0.527	4.68948	2.25991	7.63397	-0.528	39.7119	0	-0.527	23.3182	10.8674	39.1781
-0.527	0	0	-0.526	4.7052	2.28045	7.63812	-0.527	39.6587	0	-0.526	23.3024	10.8153	39.0737
-0.526	0	0	-0.525	4.72291	2.2836	7.70061	-0.526	39.6057	0	-0.525	23.2879	10.7688	38.9308
-0.525	0	0	-0.524	4.74244	2.27877	7.73169	-0.525	39.5529	0	-0.524	23.2744	10.8066	38.7596
-0.524	0	0	-0.523	4.76358	2.26698	7.72409	-0.524	39.5003	0	-0.523	23.2619	10.8181	38.6327
-0.523	0	0	-0.522	4.78631	2.24807	7.78711	-0.523	39.448	0	-0.522	23.2502	10.8436	38.5831
-0.522	0	0	-0.521	4.81062	2.26476	7.84691	-0.522	39.396	0	-0.521	23.2394	10.8726	38.553
-0.521	0	0	-0.52	4.83648	2.25781	7.86575	-0.521	39.3445	0	-0.52	23.2295	10.9053	38.5206
-0.52	0	0	-0.519	4.86386	2.25178	7.88363	-0.52	39.2934	0	-0.519	23.2205	10.9241	38.5125
-0.519	0	0	-0.518	4.89274	2.22827	7.93489	-0.519	39.2428	0	-0.518	23.2123	10.8441	38.5585
-0.518	0	0	-0.517	4.92292	2.19356	8.04163	-0.518	39.1927	0	-0.517	23.2043	10.8397	38.5219
-0.517	0	0	-0.516	4.95419	2.17709	8.11469	-0.517	39.1432	0	-0.516	23.1962	10.8579	38.4912
-0.516	0	0	-0.515	4.98652	2.18457	8.19245	-0.516	39.0944	0	-0.515	23.1879	10.8773	38.4395
-0.515	0	0	-0.514	5.01988	2.17177	8.30658	-0.515	39.0463	0	-0.514	23.1789	10.9686	38.3853
-0.514	0	0	-0.513	5.05406	2.17372	8.42067	-0.514	38.9989	0	-0.513	23.1691	11.0973	38.2438
-0.513	0	0	-0.512	5.08887	2.16191	8.48371	-0.513	38.9523	0	-0.512	23.1586	11.2283	38.1613
-0.512	0	0	-0.511	5.12425	2.15555	8.53032	-0.512	38.9065	0	-0.511	23.1474	11.3407	38.1564
-0.511	0	0	-0.51	5.16019	2.15164	8.61283	-0.511	38.8616	0	-0.51	23.1354	11.3924	38.1169
-0.51	0	0	-0.509	5.19664	2.11988	8.73272	-0.51	38.8176	0	-0.509	23.1228	11.4205	38.214
-0.509	0	0	-0.508	5.23356	2.10525	8.8713	-0.509	38.7745	0	-0.508	23.1101	11.3458	38.2569
-0.508	0	0	-0.507	5.27093	2.07136	8.95043	-0.508	38.7325	0	-0.507	23.0973	11.3466	38.316
-0.507	0	0	-0.506	5.30871	2.04903	9.07496	-0.507	38.6915	0	-0.506	23.0845	11.3509	38.3363
-0.506	0	0	-0.505	5.34685	2.05643	9.19606	-0.506	38.6516	0	-0.505	23.0718	11.3484	38.4724
-0.505	0	0	-0.504	5.38532	2.07507	9.30441	-0.505	38.6128	0	-0.504	23.0589	11.3293	38.5294
-0.504	0	0	-0.503	5.42392	2.06844	9.38194	-0.504	38.5752	0	-0.503	23.0459	11.3124	38.415
-0.503	0	0	-0.502	5.46242	2.03601	9.48319	-0.503	38.5388	0	-0.502	23.0325	11.3527	38.4065
-0.502	0	0	-0.501	5.50079	1.99729	9.57124	-0.502	38.5036	0	-0.501	23.0184	11.3447	38.4671
-0.501	0	0	-0.5	5.539	1.96368	9.64642	-0.501	38.4697	0	-0.5	23.0031	11.3059	38.3912
-0.5	0	0	-0.499	5.577	1.92749	9.80637	-0.5	38.4371	0	-0.499	22.9866	11.2967	38.3032
-0.499	0	0	-0.498	5.61477	1.88582	9.90271	-0.499	38.4058	0	-0.498	22.9686	11.2716	38.034
-0.498	0	0	-0.497	5.65225	1.86662	10.05	-0.498	38.3734	0	-0.497	22.9489	11.2673	37.9947
-0.497	0	0	-0.496	5.68942	1.87449	10.1955	-0.497	38.3376	0	-0.496	22.9277	11.2839	38.1103
-0.496	0	0	-0.495	5.72624	1.88261	10.3047	-0.496	38.3008	0	-0.495	22.9051	11.2846	38.1524
-0.495	0	0	-0.494	5.76267	1.89098	10.4034	-0.495	38.2654	0	-0.494	22.8811	11.328	38.05
-0.494	0	0	-0.493	5.79851	1.8995	10.5243	-0.494	38.2291	0	-0.493	22.8558	11.3861	38.0795
-0.493	0	0	-0.492	5.83354	1.90807	10.6683	-0.493	38.192	0	-0.492	22.8293	11.3261	38.1115
-0.492	0	0	-0.491	5.86756	1.89797	10.8217	-0.492	38.1564	0	-0.491	22.8017	11.3501	38.0895
-0.491	0	0	-0.49	5.90037	1.8851	10.9442	-0.491	38.1224	0	-0.49	22.7728	11.3709	38.0091
-0.49	0	0	-0.489	5.93192	1.88315	11.0484	-0.49	38.09	0	-0.489	22.7423	11.343	37.9234
-0.489	0	0	-0.488	5.96218	1.86516	11.1442	-0.489	38.0593	0	-0.488	22.7101	11.2995	37.832
-0.488	0	0	-0.487	5.99114	1.8465	11.2582	-0.488	38.0303	0	-0.487	22.6762	11.2309	37.7233
-0.487	0	0	-0.486	6.01876	1.81172	11.3671	-0.487	38.0031	0	-0.486	22.641	11.1451	37.6195
-0.486	0	0	-0.485	6.045	1.77972	11.459	-0.486	37.9776	0	-0.485	22.6046	11.0434	37.5354
-0.485	0	0	-0.484	6.06986	1.75117	11.5182	-0.485	37.9539	0	-0.484	22.567	10.8799	37.5236
-0.484	0	0	-0.483	6.0933	1.72335	11.5804	-0.484	37.9319	0	-0.483	22.5282	10.819	37.5054
-0.483	0	0	-0.482	6.1153	1.69627	11.6585	-0.483	37.9119	0	-0.482	22.488	10.8383	37.494
-0.482	0	0	-0.481	6.13584	1.66996	11.7347	-0.482	37.8936	0	-0.481	22.4464	10.8467	37.3992
-0.481	0	0	-0.48	6.1549	1.64445	11.8012	-0.481	37.8772	0	-0.48	22.4033	10.7863	37.3274
-0.48	0	0	-0.479	6.17245	1.61977	11.8489	-0.48	37.8627	0	-0.479	22.3588	10.6926	37.2229
-0.479	0	0	-0.478	6.18849	1.59593	11.9064	-0.479	37.8501	0	-0.478	22.3127	10.6727	37.0964
-0.478	0	0	-0.477	6.203	1.57297	12.0125	-0.478	37.8394	0	-0.477	22.265	10.58	36.9656
-0.477	0	0	-0.476	6.21579	1.55055	12.1142	-0.477	37.8331	0	-0.476	22.2157	10.4899	36.8374
-0.476	0	0	-0.475	6.22667	1.52835	12.2112	-0.476	37.8335	0	-0.475	22.165	10.4025	36.7286
-0.475	0	0	-0.474	6.23563	1.5064	12.2941	-0.475	37.8407	0	-0.474	22.1133	10.3433	36.6379
-0.474	0	0	-0.473	6.24267	1.48471	12.3451	-0.474	37.8547	0	-0.473	22.0608	10.3201	36.544
-0.473	0	0	-0.472	6.24777	1.46331	12.387	-0.473	37.8755	0	-0.472	22.0076	10.2993	36.4471
-0.472	0	0	-0.471	6.25094	1.4439	12.4306	-0.472	37.903	0	-0.471	21.9535	10.295	36.3211
-0.471	0	0	-0.47	6.25216	1.43944	12.485	-0.471	37.9372	0	-0.47	21.8985	10.3157	36.1461
-0.47	0	0	-0.469	6.25145	1.42712	12.5356	-0.47	37.9781	0	-0.469	21.8426	10.3383	35.9671
-0.469	0	0	-0.468	6.24879	1.40879	12.5809	-0.469	38.0256	0	-0.468	21.7856	10.3627	35.8373
-0.468	0	0	-0.467	6.24419	1.39236	12.5903	-0.468	38.0798	0	-0.467	21.7275	10.3754	35.7058
-0.467	0	0	-0.466	6.23766	1.37245	12.5854	-0.467	38.1404	0	-0.466	21.6683	10.3902	35.5696
-0.466	0	0	-0.465	6.2292	1.35984	12.5756	-0.466	38.2076	0	-0.465	21.6081	10.3775	35.4515
-0.465	0	0	-0.464	6.21899	1.35895	12.5758	-0.465	38.2812	0	-0.464	21.5467	10.3117	35.3348
-0.464	0	0	-0.463	6.20722	1.359	12.5876	-0.464	38.3611	0	-0.463	21.4841	10.2957	35.1943
-0.463	0	0	-0.462	6.1939	1.35997	12.5949	-0.463	38.4473	0	-0.462	21.4204	10.2954	35.0427
-0.462	0	0	-0.461	6.17904	1.36188	12.5977	-0.462	38.5397	0	-0.461	21.3556	10.2986	34.8837
-0.461	0	0	-0.46	6.16266	1.36471	12.6013	-0.461	38.6381	0	-0.46	21.2894	10.3047	34.7174
-0.46	0	0	-0.459	6.14477	1.36846	12.5905	-0.46	38.7426	0	-0.459	21.2218	10.314	34.5439
-0.459	0	0	-0.458	6.12539	1.36273	12.6115	-0.459	38.853	0	-0.458	21.153	10.3218	34.3634
-0.458	0	0	-0.457	6.10454	1.37011	12.6225	-0.458	38.9691	0	-0.457	21.0829	10.3301	34.1762
-0.457	0	0	-0.456	6.08224	1.37824	12.5993	-0.457	39.091	0	-0.456	21.0115	10.3034	33.9824
-0.456	0	0	-0.455	6.05851	1.38456	12.5723	-0.456	39.2183	0	-0.455	20.9386	10.2845	33.7821
-0.455	0	0	-0.454	6.03338	1.38098	12.5416	-0.455	39.3511	0	-0.454	20.8644	10.2687	33.5755
-0.454	0	0	-0.453	6.00686	1.3695	12.5296	-0.454	39.4893	0	-0.453	20.7889	10.2576	33.3628
-0.453	0	0	-0.452	5.97899	1.33682	12.5127	-0.453	39.6325	0	-0.452	20.7123	10.2873	33.1446
-0.452	0	0	-0.451	5.94979	1.30444	12.4871	-0.452	39.7808	0	-0.451	20.6348	10.3079	32.9209
-0.451	0	0	-0.45	5.91911	1.27303	12.4578	-0.451	39.934	0	-0.45	20.5564	10.2917	32.6916
-0.45	0	0	-0.449	5.88682	1.24264	12.4246	-0.45	40.0919	0	-0.449	20.4772	10.2722	32.4567
-0.449	0	0	-0.448	5.85295	1.21329	12.3868	-0.449	40.252	0	-0.448	20.3971	10.2579	32.2163
-0.448	0	0	-0.447	5.81752	1.18501	12.3443	-0.448	40.4116	0	-0.447	20.3159	10.2522	31.9501
-0.447	0	0	-0.446	5.7804	1.15749	12.2971	-0.447	40.5706	0	-0.446	20.2337	10.2711	31.6939
-0.446	0	0	-0.445	5.74145	1.1304	12.2449	-0.446	40.7289	0	-0.445	20.1503	10.3124	31.4433
-0.445	0	0	-0.444	5.70071	1.1038	12.188	-0.445	40.8863	0	-0.444	20.0659	10.3545	31.1779
-0.444	0	0	-0.443	5.65822	1.08784	12.1168	-0.444	41.0426	0	-0.443	19.981	10.3432	30.9005
-0.443	0	0	-0.442	5.61403	1.07203	12.0291	-0.443	41.1977	0	-0.442	19.8959	10.314	30.6365
-0.442	0	0	-0.441	5.56816	1.05638	11.9365	-0.442	41.3514	0	-0.441	19.8106	10.2871	30.3944
-0.441	0	0	-0.44	5.52068	1.04092	11.8393	-0.441	41.5036	0	-0.44	19.725	10.2647	30.1208
-0.44	0	0	-0.439	5.47162	1.01656	11.741	-0.44	41.6541	0	-0.439	19.6395	10.2714	29.8028
-0.439	0	0	-0.438	5.42103	0.987308	11.6679	-0.439	41.8029	0	-0.438	19.5542	10.3274	29.4834
-0.438	0	0	-0.437	5.36897	0.958476	11.5837	-0.438	41.9497	0	-0.437	19.469	10.384	29.2281
-0.437	0	0	-0.436	5.31548	0.942257	11.4761	-0.437	42.0943	0	-0.436	19.384	10.4261	28.9782
-0.436	0	0	-0.435	5.26061	0.931163	11.3638	-0.436	42.2368	0	-0.435	19.2991	10.4509	28.6815
-0.435	0	0	-0.434	5.20443	0.919268	11.2573	-0.435	42.3768	0	-0.434	19.2144	10.4776	28.5246
-0.434	0	0	-0.433	5.14698	0.899986	11.1585	-0.434	42.5144	0	-0.433	19.13	10.4852	28.3656
-0.433	0	0	-0.432	5.08832	0.881214	11.0552	-0.433	42.6493	0	-0.432	19.0461	10.4806	28.1398
-0.432	0	0	-0.431	5.02851	0.862969	10.9291	-0.432	42.7814	0	-0.431	18.9626	10.511	27.9266
-0.431	0	0	-0.43	4.9676	0.84527	10.7957	-0.431	42.9106	0	-0.43	18.8799	10.5433	27.7524
-0.43	0	0	-0.429	4.90566	0.828135	10.677	-0.43	43.0367	0	-0.429	18.798	10.5995	27.5011
-0.429	0	0	-0.428	4.84274	0.811578	10.5544	-0.429	43.1597	0	-0.428	18.7167	10.6381	27.2309
-0.428	0	0	-0.427	4.77892	0.795618	10.4304	-0.428	43.2795	0	-0.427	18.6357	10.6447	27.0441
-0.427	0	0	-0.426	4.71424	0.780269	10.3039	-0.427	43.3958	0	-0.426	18.555	10.6923	26.8571
-0.426	0	0	-0.425	4.64878	0.751333	10.1624	-0.426	43.5086	0	-0.425	18.475	10.6995	26.6273
-0.425	0	0	-0.424	4.58276	0.711902	10.018	-0.425	43.6178	0	-0.424	18.3956	10.6921	26.4229
-0.424	0	0	-0.423	4.51644	0.687305	9.87087	-0.424	43.7232	0	-0.423	18.3172	10.6759	26.2483
-0.423	0	0	-0.422	4.44987	0.661838	9.72125	-0.423	43.8273	0	-0.422	18.24	10.7224	26.0741
-0.422	0	0	-0.421	4.38312	0.635958	9.56925	-0.422	43.9322	0	-0.421	18.1639	10.7711	25.8395
-0.421	0	0	-0.42	4.31643	0.616832	9.40783	-0.421	44.0356	0	-0.42	18.0888	10.8219	25.6205
-0.42	0	0	-0.419	4.25003	0.629398	9.24459	-0.42	44.1348	0	-0.419	18.0149	10.8749	25.4923
-0.419	0	0	-0.418	4.18399	0.64731	9.07943	-0.419	44.2323	0	-0.418	17.9426	10.9299	25.4103
-0.418	0	0	-0.417	4.11838	0.618874	8.91252	-0.418	44.3302	0	-0.417	17.8718	10.9446	25.3058
-0.417	0	0	-0.416	4.05326	0.601761	8.74402	-0.417	44.4286	0	-0.416	17.8026	10.9248	25.0217
-0.416	0	0	-0.415	3.98869	0.580476	8.57436	-0.416	44.5274	0	-0.415	17.7352	10.892	24.7661
-0.415	0	0	-0.414	3.92474	0.559226	8.40395	-0.415	44.6264	0	-0.414	17.6697	10.9436	24.7444
-0.414	0	0	-0.413	3.86147	0.546721	8.24456	-0.414	44.7279	0	-0.413	17.6063	11.0348	24.6106
-0.413	0	0	-0.412	3.79894	0.553881	8.09519	-0.413	44.8344	0	-0.412	17.5452	11.0421	24.5714
-0.412	0	0	-0.411	3.73721	0.561433	7.91594	-0.412	44.9456	0	-0.411	17.4865	11.0265	24.4318
-0.411	0	0	-0.41	3.67635	0.543418	7.73676	-0.411	45.0616	0	-0.41	17.4302	11.0734	24.2957
-0.41	0	0	-0.409	3.6164	0.548884	7.55592	-0.41	45.1846	0	-0.409	17.3767	11.0953	24.1134
-0.409	0	0	-0.408	3.55744	0.550108	7.38841	-0.409	45.3169	0	-0.408	17.3262	11.0597	24.0922
-0.408	0	0	-0.407	3.49952	0.551012	7.22068	-0.408	45.4584	0	-0.407	17.2789	11.0318	24.0374
-0.407	0	0	-0.406	3.44286	0.54861	7.06119	-0.407	45.6089	0	-0.406	17.2349	11.0293	23.9108
-0.406	0	0	-0.405	3.3877	0.550102	6.91893	-0.406	45.7684	0	-0.405	17.1941	11.0337	23.9043
-0.405	0	0	-0.404	3.33409	0.560944	6.75445	-0.405	45.9366	0	-0.404	17.1567	10.9569	23.7801
-0.404	0	0	-0.403	3.28208	0.575404	6.594	-0.404	46.111	0	-0.403	17.1225	10.8951	23.7629
-0.403	0	0	-0.402	3.23173	0.582936	6.44255	-0.403	46.2889	0	-0.402	17.0914	10.8808	23.6815
-0.402	0	0	-0.401	3.18308	0.572789	6.31227	-0.402	46.4702	0	-0.401	17.0635	10.8283	23.6852
-0.401	0	0	-0.4	3.13618	0.573002	6.17031	-0.401	46.6547	0	-0.4	17.0391	10.7796	23.648
-0.4	0	0	-0.399	3.09108	0.580148	6.02879	-0.4	46.8423	0	-0.399	17.0183	10.7431	23.6419
-0.399	0	0	-0.398	3.04782	0.617763	5.92234	-0.399	47.0351	0	-0.398	17.0014	10.7799	23.6228
-0.398	0	0	-0.397	3.00645	0.642047	5.80471	-0.398	47.2354	0	-0.397	16.9884	10.8573	23.5769
-0.397	0	0	-0.396	2.96699	0.662858	5.68364	-0.397	47.4431	0	-0.396	16.9795	10.8795	23.5276
-0.396	0	0	-0.395	2.9295	0.678377	5.59207	-0.396	47.6578	0	-0.395	16.9746	10.8838	23.5148
-0.395	0	0	-0.394	2.89384	0.695837	5.48736	-0.395	47.8795	0	-0.394	16.9736	10.8836	23.5084
-0.394	0	0	-0.393	2.85969	0.721581	5.37769	-0.394	48.1078	0	-0.393	16.9764	10.8756	23.5408
-0.393	0	0	-0.392	2.82708	0.744557	5.26033	-0.393	48.3427	0	-0.392	16.9825	10.846	23.5975
-0.392	0	0	-0.391	2.79622	0.768203	5.1229	-0.392	48.5837	0	-0.391	16.9918	10.8016	23.6301
-0.391	0	0	-0.39	2.76715	0.793529	5.03492	-0.391	48.8308	0	-0.39	17.0043	10.7776	23.6542
-0.39	0	0	-0.389	2.73989	0.820511	4.95928	-0.39	49.0836	0	-0.389	17.02	10.7852	23.6999
-0.389	0	0	-0.388	2.71446	0.849121	4.8893	-0.389	49.342	0	-0.388	17.0388	10.7885	23.7967
-0.388	0	0	-0.387	2.69089	0.863877	4.81705	-0.388	49.6056	0	-0.387	17.0607	10.7473	23.921
-0.387	0	0	-0.386	2.66921	0.896745	4.74042	-0.387	49.8742	0	-0.386	17.0851	10.7463	24.0486
-0.386	0	0	-0.385	2.64944	0.868926	4.68203	-0.386	50.1475	0	-0.385	17.1121	10.7286	24.179
-0.385	0	0	-0.384	2.63159	0.877822	4.56462	-0.385	50.4253	0	-0.384	17.1418	10.7202	24.2712
-0.384	0	0	-0.383	2.61603	0.903023	4.51663	-0.384	50.7074	0	-0.383	17.1739	10.7418	24.3598
-0.383	0	0	-0.382	2.60312	0.911809	4.48525	-0.383	50.9933	0	-0.382	17.2079	10.7665	24.451
-0.382	0	0	-0.381	2.59288	0.915916	4.45786	-0.382	51.2805	0	-0.381	17.2437	10.7901	24.544
-0.381	0	0	-0.38	2.58531	0.911705	4.39939	-0.381	51.5662	0	-0.38	17.2812	10.7836	24.6387
-0.38	0	0	-0.379	2.58043	0.918328	4.38228	-0.38	51.8501	0	-0.379	17.3205	10.78	24.735
-0.379	0	0	-0.378	2.57823	0.948613	4.3799	-0.379	52.1319	0	-0.378	17.3612	10.7678	24.8261
-0.378	0	0	-0.377	2.57872	0.961868	4.34603	-0.378	52.4114	0	-0.377	17.4031	10.7398	24.9109
-0.377	0	0	-0.376	2.58208	0.974739	4.3177	-0.377	52.6883	0	-0.376	17.4462	10.7332	24.9943
-0.376	0	0	-0.375	2.58846	0.973729	4.32748	-0.376	52.9624	0	-0.375	17.4902	10.7391	25.0763
-0.375	0	0	-0.374	2.59787	0.984695	4.37994	-0.375	53.2333	0	-0.374	17.5352	10.7666	25.2196
-0.374	0	0	-0.373	2.6103	0.999082	4.4558	-0.374	53.5008	0	-0.373	17.5807	10.7841	25.3333
-0.373	0	0	-0.372	2.62574	0.979266	4.49675	-0.373	53.7647	0	-0.372	17.6267	10.766	25.4345
-0.372	0	0	-0.371	2.64416	0.978119	4.53139	-0.372	54.0246	0	-0.371	17.6729	10.7417	25.5359
-0.371	0	0	-0.37	2.66556	0.963612	4.59643	-0.371	54.2804	0	-0.37	17.7192	10.7456	25.5929
-0.37	0	0	-0.369	2.68991	0.971982	4.64392	-0.37	54.5317	0	-0.369	17.7656	10.7573	25.6635
-0.369	0	0	-0.368	2.71718	0.949412	4.67641	-0.369	54.7783	0	-0.368	17.812	10.7692	25.7679
-0.368	0	0	-0.367	2.74736	0.949534	4.70703	-0.368	55.0201	0	-0.367	17.8583	10.7812	25.8702
-0.367	0	0	-0.366	2.78023	0.962072	4.72881	-0.367	55.2567	0	-0.366	17.9046	10.7932	25.9703
-0.366	0	0	-0.365	2.8156	0.982306	4.77856	-0.366	55.4879	0	-0.365	17.9507	10.8052	26.0682
-0.365	0	0	-0.364	2.85359	0.996419	4.8195	-0.365	55.7135	0	-0.364	17.9966	10.8173	26.1693
-0.364	0	0	-0.363	2.89436	0.997146	4.8798	-0.364	55.9333	0	-0.363	18.0425	10.815	26.2703
-0.363	0	0	-0.362	2.93785	1.02068	4.9659	-0.363	56.147	0	-0.362	18.0882	10.7908	26.3693
-0.362	0	0	-0.361	2.9842	1.0522	5.04624	-0.362	56.3545	0	-0.361	18.1329	10.7665	26.4658
-0.361	0	0	-0.36	3.03354	1.08649	5.14554	-0.361	56.5556	0	-0.36	18.1765	10.7734	26.5367
-0.36	0	0	-0.359	3.08581	1.11666	5.26424	-0.36	56.7524	0	-0.359	18.2188	10.7946	26.6073
-0.359	0	0	-0.358	3.14097	1.14224	5.37502	-0.359	56.9473	0	-0.358	18.26	10.8162	26.6895
-0.358	0	0	-0.357	3.19914	1.17509	5.48252	-0.358	57.1399	0	-0.357	18.3001	10.8314	26.7655
-0.357	0	0	-0.356	3.26044	1.2155	5.5822	-0.357	57.3303	0	-0.356	18.3396	10.8592	26.8676
-0.356	0	0	-0.355	3.32462	1.2545	5.67326	-0.356	57.5205	0	-0.355	18.3785	10.8724	26.9784
-0.355	0	0	-0.354	3.39146	1.29768	5.80945	-0.355	57.7128	0	-0.354	18.4168	10.8747	27.0874
-0.354	0	0	-0.353	3.46089	1.32743	5.94627	-0.354	57.9071	0	-0.353	18.4547	10.8718	27.1766
-0.353	0	0	-0.352	3.53284	1.36446	6.04403	-0.353	58.1031	0	-0.352	18.4922	10.8548	27.2853
-0.352	0	0	-0.351	3.60707	1.39657	6.17445	-0.352	58.3007	0	-0.351	18.5294	10.8375	27.4034
-0.351	0	0	-0.35	3.68333	1.42803	6.2831	-0.351	58.4997	0	-0.35	18.5661	10.8223	27.515
-0.35	0	0	-0.349	3.76154	1.46192	6.39297	-0.35	58.6974	0	-0.349	18.6025	10.8427	27.5836
-0.349	0	0	-0.348	3.84164	1.4982	6.48928	-0.349	58.8912	0	-0.348	18.6382	10.8586	27.6445
-0.348	0	0	-0.347	3.92336	1.54598	6.63366	-0.348	59.081	0	-0.347	18.673	10.8608	27.7035
-0.347	0	0	-0.346	4.00646	1.61809	6.77197	-0.347	59.2665	0	-0.346	18.7068	10.8723	27.7681
-0.346	0	0	-0.345	4.09085	1.6903	6.91025	-0.346	59.4475	0	-0.345	18.7394	10.9054	27.8263
-0.345	0	0	-0.344	4.17628	1.74549	7.04733	-0.345	59.624	0	-0.344	18.7706	10.9559	27.8283
-0.344	0	0	-0.343	4.26249	1.81407	7.15198	-0.344	59.7956	0	-0.343	18.8005	11.006	27.8378
-0.343	0	0	-0.342	4.3494	1.86031	7.2432	-0.343	59.9624	0	-0.342	18.829	11.0495	27.9049
-0.342	0	0	-0.341	4.43692	1.90125	7.35632	-0.342	60.124	0	-0.341	18.8564	11.0806	27.9601
-0.341	0	0	-0.34	4.52496	1.92334	7.48843	-0.341	60.2803	0	-0.34	18.8827	11.1122	27.9804
-0.34	0	0	-0.339	4.61344	1.96146	7.6258	-0.34	60.4312	0	-0.339	18.9078	11.1539	27.9988
-0.339	0	0	-0.338	4.70228	2.0182	7.76476	-0.339	60.5765	0	-0.338	18.9319	11.1804	28.0495
-0.338	0	0	-0.337	4.79138	2.08721	7.8819	-0.338	60.7161	0	-0.337	18.9547	11.2072	28.1005
-0.337	0	0	-0.336	4.88067	2.15887	8.01474	-0.337	60.8499	0	-0.336	18.9759	11.2054	28.1488
-0.336	0	0	-0.335	4.97004	2.21333	8.1482	-0.336	60.9776	0	-0.335	18.9957	11.2144	28.2029
-0.335	0	0	-0.334	5.05925	2.28403	8.24696	-0.335	61.0993	0	-0.334	19.0139	11.2218	28.2605
-0.334	0	0	-0.333	5.14803	2.34892	8.35204	-0.334	61.2147	0	-0.333	19.0305	11.2375	28.2898
-0.333	0	0	-0.332	5.23629	2.4016	8.45146	-0.333	61.3238	0	-0.332	19.0459	11.2471	28.314
-0.332	0	0	-0.331	5.32395	2.46851	8.56089	-0.332	61.4265	0	-0.331	19.0603	11.2287	28.3332
-0.331	0	0	-0.33	5.41092	2.51805	8.68315	-0.331	61.5226	0	-0.33	19.0739	11.2185	28.3448
-0.33	0	0	-0.329	5.49712	2.57665	8.7969	-0.33	61.6121	0	-0.329	19.0866	11.2314	28.3354
-0.329	0	0	-0.328	5.58263	2.61149	8.90311	-0.329	61.6948	0	-0.328	19.0983	11.259	28.3428
-0.328	0	0	-0.327	5.66755	2.67157	9.00902	-0.328	61.7707	0	-0.327	19.109	11.2974	28.3583
-0.327	0	0	-0.326	5.75179	2.73394	9.11203	-0.327	61.8398	0	-0.326	19.1186	11.331	28.3704
-0.326	0	0	-0.325	5.83545	2.7756	9.21794	-0.326	61.9019	0	-0.325	19.1271	11.3594	28.3793
-0.325	0	0	-0.324	5.91862	2.80988	9.33869	-0.325	61.9594	0	-0.324	19.1346	11.3616	28.3852
-0.324	0	0	-0.323	6.00121	2.85302	9.47332	-0.324	62.0147	0	-0.323	19.1411	11.3877	28.3882
-0.323	0	0	-0.322	6.08314	2.91217	9.62455	-0.323	62.0677	0	-0.322	19.1466	11.3995	28.3883
-0.322	0	0	-0.321	6.16434	2.96021	9.74999	-0.322	62.1185	0	-0.321	19.1511	11.4006	28.3855
-0.321	0	0	-0.32	6.24473	3.00883	9.85652	-0.321	62.1669	0	-0.32	19.1546	11.4023	28.4157
-0.32	0	0	-0.319	6.32422	3.05798	9.96257	-0.32	62.2128	0	-0.319	19.1574	11.3738	28.4616
-0.319	0	0	-0.318	6.40274	3.10762	10.0845	-0.319	62.2588	0	-0.318	19.1599	11.3397	28.5005
-0.318	0	0	-0.317	6.48022	3.15511	10.1955	-0.318	62.3071	0	-0.317	19.1621	11.3224	28.5105
-0.317	0	0	-0.316	6.55657	3.19777	10.3393	-0.317	62.3577	0	-0.316	19.164	11.3291	28.518
-0.316	0	0	-0.315	6.63172	3.25307	10.4416	-0.316	62.4106	0	-0.315	19.1656	11.3594	28.5307
-0.315	0	0	-0.314	6.7056	3.31003	10.5284	-0.315	62.4657	0	-0.314	19.1668	11.3301	28.5177
-0.314	0	0	-0.313	6.77813	3.3556	10.6332	-0.314	62.5229	0	-0.313	19.1678	11.375	28.5732
-0.313	0	0	-0.312	6.84926	3.38303	10.7728	-0.313	62.5823	0	-0.312	19.1683	11.4222	28.6272
-0.312	0	0	-0.311	6.91907	3.40528	10.8886	-0.312	62.6437	0	-0.311	19.1688	11.468	28.6768
-0.311	0	0	-0.31	6.98768	3.41471	10.9974	-0.311	62.7071	0	-0.31	19.1692	11.4874	28.6587
-0.31	0	0	-0.309	7.05501	3.43697	11.0917	-0.31	62.7724	0	-0.309	19.1697	11.4962	28.6727
-0.309	0	0	-0.308	7.12101	3.46814	11.2025	-0.309	62.8396	0	-0.308	19.1699	11.4861	28.7155
-0.308	0	0	-0.307	7.1856	3.51067	11.3014	-0.308	62.9062	0	-0.307	19.1692	11.5075	28.7574
-0.307	0	0	-0.306	7.24873	3.55505	11.3946	-0.307	62.9696	0	-0.306	19.1676	11.5255	28.799
-0.306	0	0	-0.305	7.31034	3.58757	11.4512	-0.306	63.0322	0	-0.305	19.1654	11.4549	28.8407
-0.305	0	0	-0.304	7.37035	3.61563	11.514	-0.305	63.0965	0	-0.304	19.1627	11.4033	28.8628
-0.304	0	0	-0.303	7.42872	3.6436	11.5856	-0.304	63.1623	0	-0.303	19.1597	11.3675	28.8783
-0.303	0	0	-0.302	7.48539	3.67131	11.6535	-0.303	63.2296	0	-0.302	19.1565	11.3706	28.8945
-0.302	0	0	-0.301	7.5403	3.70317	11.7136	-0.302	63.2983	0	-0.301	19.1535	11.3775	28.9117
-0.301	0	0	-0.3	7.59339	3.7212	11.744	-0.301	63.3683	0	-0.3	19.1509	11.3273	28.8997
-0.3	0	0	-0.299	7.64462	3.7225	11.7706	-0.3	63.4396	0	-0.299	19.1487	11.3266	28.8676
-0.299	0.00243056	0	-0.298	7.69412	3.77004	11.7934	-0.299	63.5122	0	-0.298	19.1469	11.3289	28.8377
-0.298	0.00971986	0	-0.297	7.74199	3.83638	11.8717	-0.298	63.5858	0	-0.297	19.1454	11.3345	28.8669
-0.297	0.0218608	0	-0.296	7.78821	3.87829	11.9444	-0.297	63.6606	0	-0.296	19.1444	11.346	28.9042
-0.296	0.0388415	0	-0.295	7.83272	3.94676	12.0448	-0.296	63.7363	0	-0.295	19.1438	11.3897	28.9293
-0.295	0.0606453	0	-0.294	7.87548	3.9896	12.1098	-0.295	63.8105	0	-0.294	19.1433	11.4279	28.937
-0.294	0.087251	0	-0.293	7.91644	3.99867	12.1299	-0.294	63.8807	0	-0.293	19.1429	11.4097	28.8922
-0.293	0.118633	0	-0.292	7.95557	3.98203	12.1706	-0.293	63.9468	0	-0.292	19.1424	11.3115	28.8313
-0.292	0.154759	0	-0.291	7.99284	3.96343	12.2247	-0.292	64.0064	0	-0.291	19.1416	11.2756	28.8207
-0.291	0.195596	0	-0.29	8.02819	3.9945	12.2576	-0.291	64.0568	0	-0.29	19.1405	11.2404	28.83
-0.29	0.241103	0	-0.289	8.06178	4.04079	12.3391	-0.29	64.0982	0	-0.289	19.1391	11.206	28.86
-0.289	0.291235	0	-0.288	8.09374	4.09483	12.3891	-0.289	64.1304	0	-0.288	19.1374	11.1866	28.8577
-0.288	0.345944	0	-0.287	8.12405	4.14851	12.3941	-0.288	64.1534	0	-0.287	19.1354	11.1672	28.8381
-0.287	0.405176	0	-0.286	8.15266	4.19913	12.4414	-0.287	64.1672	0	-0.286	19.1331	11.1634	28.7883
-0.286	0.468873	0	-0.285	8.17956	4.2228	12.4638	-0.286	64.1718	0	-0.285	19.1303	11.1341	28.7107
-0.285	0.536973	0	-0.284	8.20472	4.24652	12.466	-0.285	64.1671	0	-0.284	19.1269	11.1335	28.6797
-0.284	0.609409	0	-0.283	8.22811	4.28863	12.4908	-0.284	64.1532	0	-0.283	19.1229	11.169	28.6609
-0.283	0.686112	0	-0.282	8.24971	4.33953	12.5122	-0.283	64.1301	0	-0.282	19.1182	11.1687	28.6377
-0.282	0.767005	0	-0.281	8.2695	4.33522	12.547	-0.282	64.0978	0	-0.281	19.1129	11.1174	28.6119
-0.281	0.852009	0	-0.28	8.28746	4.3495	12.5992	-0.281	64.0564	0	-0.28	19.107	11.0715	28.5911
-0.28	0.941043	0	-0.279	8.30357	4.36334	12.6478	-0.28	64.0059	0	-0.279	19.1005	11.0832	28.5472
-0.279	1.03402	0	-0.278	8.31782	4.35789	12.6905	-0.279	63.9462	0	-0.278	19.0934	11.0698	28.5079
-0.278	1.13084	0	-0.277	8.33019	4.34542	12.7067	-0.278	63.8776	0	-0.277	19.0856	11.0465	28.4618
-0.277	1.23143	0	-0.276	8.34085	4.33244	12.7103	-0.277	63.8	0	-0.276	19.0773	11.0514	28.4424
-0.276	1.33566	0	-0.275	8.34996	4.32244	12.7106	-0.276	63.7112	0	-0.275	19.0684	11.0482	28.3799
-0.275	1.44346	0	-0.274	8.3575	4.3217	12.7074	-0.275	63.6087	0	-0.274	19.0588	11.0853	28.2983
-0.274	1.55471	0	-0.273	8.36347	4.32125	12.7278	-0.274	63.4926	0	-0.273	19.048	11.1422	28.2841
-0.273	1.6693	0	-0.272	8.36787	4.32108	12.7613	-0.273	63.3632	0	-0.272	19.036	11.1744	28.276
-0.272	1.78711	0	-0.271	8.37069	4.35532	12.7518	-0.272	63.2204	0	-0.271	19.0228	11.1734	28.26
-0.271	1.90805	0	-0.27	8.37228	4.33695	12.7387	-0.271	63.0644	0	-0.27	19.0083	11.1745	28.2141
-0.27	2.03198	0	-0.269	8.37298	4.30065	12.7221	-0.27	62.8955	0	-0.269	18.9927	11.2083	28.1718
-0.269	2.15879	0	-0.268	8.37278	4.28788	12.7022	-0.269	62.7137	0	-0.268	18.9758	11.1487	28.1116
-0.268	2.28834	0	-0.267	8.3717	4.28756	12.7433	-0.268	62.5193	0	-0.267	18.9579	11.1288	28.0745
-0.267	2.42053	0	-0.266	8.36973	4.26405	12.7688	-0.267	62.3123	0	-0.266	18.9392	11.1164	28.0261
-0.266	2.55521	0	-0.265	8.36705	4.24201	12.6959	-0.266	62.0932	0	-0.265	18.9197	11.0807	27.969
-0.265	2.69225	0	-0.264	8.36383	4.26839	12.6711	-0.265	61.8619	0	-0.264	18.8995	11.0519	27.9091
-0.264	2.83152	0	-0.263	8.35991	4.27898	12.6966	-0.264	61.6188	0	-0.263	18.8785	11.0164	27.8464
-0.263	2.97289	0	-0.262	8.3551	4.27785	12.6925	-0.263	61.3641	0	-0.262	18.8567	10.9783	27.794
-0.262	3.11622	0	-0.261	8.34943	4.28862	12.6516	-0.262	61.0981	0	-0.261	18.8342	10.9111	27.8285
-0.261	3.26136	0	-0.26	8.34289	4.30005	12.606	-0.261	60.821	0	-0.26	18.8111	10.8433	27.8742
-0.26	3.40817	0	-0.259	8.33549	4.32509	12.5558	-0.26	60.533	0	-0.259	18.7872	10.7774	27.8242
-0.259	3.55652	0	-0.258	8.32741	4.33821	12.557	-0.259	60.2346	0	-0.258	18.7627	10.7724	27.84
-0.258	3.70625	0	-0.257	8.31883	4.38633	12.5698	-0.258	59.9258	0	-0.257	18.7376	10.7402	27.8961
-0.257	3.85723	0	-0.256	8.30976	4.39622	12.5639	-0.257	59.6072	0	-0.256	18.7117	10.6714	27.9022
-0.256	4.00929	0	-0.255	8.30022	4.3631	12.5284	-0.256	59.2789	0	-0.255	18.6849	10.6066	27.9043
-0.255	4.1623	0	-0.254	8.2902	4.35149	12.4815	-0.255	58.9413	0	-0.254	18.6572	10.526	27.9382
-0.254	4.3161	0	-0.253	8.27989	4.36444	12.4297	-0.254	58.5947	0	-0.253	18.6287	10.4836	27.8989
-0.253	4.47055	0	-0.252	8.26948	4.42784	12.4167	-0.253	58.2395	0	-0.252	18.5992	10.4215	27.8587
-0.252	4.62549	0	-0.251	8.25898	4.49403	12.399	-0.252	57.876	0	-0.251	18.5688	10.3601	27.8752
-0.251	4.78077	0	-0.25	8.24839	4.50754	12.3735	-0.251	57.5046	0	-0.25	18.5373	10.2719	27.9884
-0.25	4.93624	0	-0.249	8.23773	4.48501	12.3101	-0.25	57.1255	0	-0.249	18.5045	10.1754	27.9163
-0.249	5.09175	0	-0.248	8.22701	4.51388	12.3486	-0.249	56.7393	0	-0.248	18.4703	10.1191	27.9491
-0.248	5.24715	0	-0.247	8.21623	4.54923	12.3591	-0.248	56.3463	0	-0.247	18.4347	10.0909	27.9566
-0.247	5.40228	0	-0.246	8.20541	4.55972	12.3943	-0.247	55.9468	0	-0.246	18.3978	10.0518	27.9348
-0.246	5.55699	0	-0.245	8.19474	4.58271	12.3686	-0.246	55.5412	0	-0.245	18.3595	10.0353	27.9284
-0.245	5.71114	0	-0.244	8.18439	4.59008	12.3465	-0.245	55.13	0	-0.244	18.32	10.0132	27.8621
-0.244	5.86456	0	-0.243	8.17438	4.59939	12.3917	-0.244	54.7135	0	-0.243	18.2791	9.97265	27.8608
-0.243	6.01712	0	-0.242	8.16471	4.64253	12.4062	-0.243	54.2922	0	-0.242	18.2366	9.93697	27.8251
-0.242	6.16865	0	-0.241	8.1554	4.65949	12.3863	-0.242	53.8665	0	-0.241	18.1925	9.85361	27.7161
-0.241	6.31902	0	-0.24	8.14645	4.62943	12.3646	-0.241	53.4367	0	-0.24	18.1465	9.76533	27.5433
-0.24	6.46808	0	-0.239	8.13788	4.60325	12.3267	-0.24	53.0033	0	-0.239	18.0988	9.67576	27.3673
-0.239	6.61568	0	-0.238	8.12987	4.57233	12.303	-0.239	52.5668	0	-0.238	18.0492	9.6122	27.2142
-0.238	6.76168	0	-0.237	8.12259	4.55067	12.3253	-0.238	52.1275	0	-0.237	17.9976	9.56657	27.0954
-0.237	6.90593	0	-0.236	8.11605	4.57468	12.3698	-0.237	51.6858	0	-0.236	17.9441	9.53139	26.9745
-0.236	7.04829	0	-0.235	8.11027	4.56997	12.318	-0.236	51.2423	0	-0.235	17.8886	9.48448	26.8719
-0.235	7.18863	0	-0.234	8.10524	4.56738	12.2799	-0.235	50.7974	0	-0.234	17.8313	9.43418	26.8266
-0.234	7.32681	0	-0.233	8.10097	4.55712	12.2732	-0.234	50.3514	0	-0.233	17.7722	9.38891	26.6956
-0.233	7.46269	0	-0.232	8.09747	4.54167	12.2519	-0.233	49.9048	0	-0.232	17.7113	9.31292	26.5744
-0.232	7.59613	0	-0.231	8.09491	4.53031	12.2142	-0.232	49.4581	0	-0.231	17.6488	9.21719	26.5843
-0.231	7.72702	0	-0.23	8.09346	4.51398	12.1399	-0.231	49.0116	0	-0.23	17.5846	9.19305	26.6106
-0.23	7.85522	0	-0.229	8.09332	4.50136	12.188	-0.23	48.5659	0	-0.229	17.5187	9.18598	26.6097
-0.229	7.9806	0	-0.228	8.09463	4.53923	12.1639	-0.229	48.1213	0	-0.228	17.451	9.15575	26.5464
-0.228	8.10305	0	-0.227	8.09742	4.58296	12.1572	-0.228	47.6784	0	-0.227	17.3815	9.10012	26.5343
-0.227	8.22244	0	-0.226	8.10184	4.59982	12.1443	-0.227	47.2374	0	-0.226	17.3103	9.01064	26.5182
-0.226	8.33866	0	-0.225	8.10807	4.63155	12.1637	-0.226	46.7989	0	-0.225	17.2373	8.92052	26.5331
-0.225	8.45159	0	-0.224	8.11609	4.66622	12.1864	-0.225	46.3633	0	-0.224	17.1623	8.8141	26.4986
-0.224	8.56112	0	-0.223	8.12574	4.70656	12.2353	-0.224	45.931	0	-0.223	17.0854	8.69502	26.5081
-0.223	8.66715	0	-0.222	8.137	4.71359	12.2777	-0.223	45.5025	0	-0.222	17.0062	8.54653	26.4804
-0.222	8.76958	0	-0.221	8.15002	4.72047	12.2914	-0.222	45.0756	0	-0.221	16.9246	8.39428	26.4195
-0.221	8.86829	0	-0.22	8.16481	4.73634	12.3163	-0.221	44.6485	0	-0.22	16.8407	8.29608	26.3927
-0.22	8.96321	0	-0.219	8.18116	4.74364	12.3366	-0.22	44.2215	0	-0.219	16.7547	8.22212	26.3609
-0.219	9.05422	0	-0.218	8.1989	4.78016	12.3899	-0.219	43.795	0	-0.218	16.6668	8.09631	26.2386
-0.218	9.14125	0	-0.217	8.218	4.78002	12.5051	-0.218	43.3671	0	-0.217	16.577	7.96683	26.1019
-0.217	9.22421	0	-0.216	8.23845	4.79062	12.6215	-0.217	42.9357	0	-0.216	16.4856	7.83313	25.988
-0.216	9.30302	0	-0.215	8.2604	4.79341	12.6663	-0.216	42.5012	0	-0.215	16.3927	7.71278	25.9353
-0.215	9.3776	0	-0.214	8.28399	4.80245	12.6629	-0.215	42.0641	0	-0.214	16.2982	7.62296	25.8468
-0.214	9.44787	0	-0.213	8.30939	4.80152	12.7273	-0.214	41.6247	0	-0.213	16.2018	7.53819	25.6916
-0.213	9.51378	0	-0.212	8.33692	4.83833	12.7411	-0.213	41.1812	0	-0.212	16.1034	7.4276	25.5722
-0.212	9.57525	0	-0.211	8.36671	4.86709	12.8012	-0.212	40.7314	0	-0.211	16.0032	7.31791	25.4475
-0.211	9.63223	0	-0.21	8.39909	4.88824	12.875	-0.211	40.2759	0	-0.21	15.9013	7.20923	25.3316
-0.21	9.68466	0	-0.209	8.43438	4.90618	12.9294	-0.21	39.815	0	-0.209	15.7976	7.10158	25.2688
-0.209	9.73248	0	-0.208	8.47254	4.91049	12.9995	-0.209	39.3469	0	-0.208	15.6919	6.99979	25.1171
-0.208	9.77566	0	-0.207	8.51353	4.94839	13.0893	-0.208	38.8695	0	-0.207	15.5843	6.91097	25
-0.207	9.81414	0	-0.206	8.55731	4.9864	13.1788	-0.207	38.3832	0	-0.206	15.4747	6.82253	24.9174
-0.206	9.8479	0	-0.205	8.60367	5.04136	13.2331	-0.206	37.8886	0	-0.205	15.3633	6.73497	24.8407
-0.205	9.8769	0	-0.204	8.65256	5.09838	13.2562	-0.205	37.3862	0	-0.204	15.2504	6.64881	24.7589
-0.204	9.90111	0	-0.203	8.70411	5.15815	13.3691	-0.204	36.8764	0	-0.203	15.136	6.54664	24.6986
-0.203	9.9205	0	-0.202	8.75826	5.21811	13.466	-0.203	36.3597	0	-0.202	15.02	6.44839	24.6193
-0.202	9.93506	0	-0.201	8.81497	5.25522	13.5012	-0.202	35.8367	0	-0.201	14.9026	6.35215	24.4839
-0.201	9.94478	0	-0.2	8.87417	5.30542	13.5812	-0.201	35.3078	0	-0.2	14.7835	6.24738	24.337
-0.2	9.94964	0	-0.199	8.93582	5.34994	13.6309	-0.2	34.7736	0	-0.199	14.6629	6.14345	24.1652
-0.199	9.94964	0	-0.198	8.99984	5.35542	13.7131	-0.199	34.2346	0	-0.198	14.5407	6.04047	23.9882
-0.198	9.94478	0	-0.197	9.06636	5.37099	13.8154	-0.198	33.6889	0	-0.197	14.4167	5.96187	23.8282
-0.197	9.93506	0	-0.196	9.13565	5.4119	13.8986	-0.197	33.1345	0	-0.196	14.2911	5.90412	23.7198
-0.196	9.9205	0	-0.195	9.20782	5.4437	13.9852	-0.196	32.5721	0	-0.195	14.164	5.82165	23.5565
-0.195	9.90111	0	-0.194	9.2828	5.48558	14.0848	-0.195	32.0022	0	-0.194	14.0351	5.72446	23.3308
-0.194	9.8769	0	-0.193	9.36051	5.49795	14.2147	-0.194	31.4253	0	-0.193	13.9046	5.63202	23.1297
-0.193	9.8479	0	-0.192	9.44088	5.55564	14.3503	-0.193	30.842	0	-0.192	13.7728	5.57691	22.9865
-0.192	9.81414	0	-0.191	9.52366	5.59596	14.4845	-0.192	30.2529	0	-0.191	13.6396	5.49232	22.8386
-0.191	9.77566	0	-0.19	9.60877	5.6592	14.6192	-0.191	29.6585	0	-0.19	13.5052	5.41688	22.6861
-0.19	9.73248	0	-0.189	9.69647	5.69293	14.792	-0.19	29.0594	0	-0.189	13.3698	5.33135	22.5292
-0.189	9.68466	0	-0.188	9.78684	5.75273	14.8975	-0.189	28.4563	0	-0.188	13.2335	5.2473	22.3679
-0.188	9.63223	0	-0.187	9.87998	5.81727	15.0311	-0.188	27.8497	0	-0.187	13.0964	5.18013	22.2025
-0.187	9.57525	0	-0.186	9.97614	5.83682	15.1871	-0.187	27.2401	0	-0.186	12.9587	5.12804	22.0331
-0.186	9.51378	0	-0.185	10.0754	5.89913	15.3055	-0.186	26.6283	0	-0.185	12.8205	5.05534	21.8599
-0.185	9.44787	0	-0.184	10.1777	5.9539	15.441	-0.185	26.0147	0	-0.184	12.6817	4.93642	21.6826
-0.184	9.3776	0	-0.183	10.283	5.98327	15.601	-0.184	25.4	0	-0.183	12.5423	4.82066	21.4988
-0.183	9.30302	0	-0.182	10.3915	6.02475	15.7984	-0.183	24.7848	0	-0.182	12.4025	4.71549	21.2579
-0.182	9.22421	0	-0.181	10.5032	6.08804	15.9623	-0.182	24.1697	0	-0.181	12.2622	4.66459	21.01
-0.181	9.14125	0	-0.18	10.6183	6.16817	16.1321	-0.181	23.5553	0	-0.18	12.1214	4.61373	20.7679
-0.18	9.05422	0	-0.179	10.737	6.27324	16.2614	-0.18	22.9422	0	-0.179	11.98	4.53753	20.557
-0.179	8.96321	0	-0.178	10.8591	6.39584	16.416	-0.179	22.3309	0	-0.178	11.838	4.47503	20.3424
-0.178	8.86829	0	-0.177	10.9848	6.50969	16.5481	-0.178	21.7222	0	-0.177	11.6956	4.41355	20.1257
-0.177	8.76958	0	-0.176	11.1143	6.58328	16.6804	-0.177	21.1165	0	-0.176	11.5528	4.35313	19.8797
-0.176	8.66715	0	-0.175	11.2474	6.62234	16.8818	-0.176	20.5145	0	-0.175	11.4099	4.3404	19.6084
-0.175	8.56112	0	-0.174	11.3839	6.7252	17.0948	-0.175	19.9168	0	-0.174	11.2669	4.33183	19.3975
-0.174	8.45159	0	-0.173	11.5239	6.81601	17.3257	-0.174	19.3239	0	-0.173	11.124	4.30854	19.169
-0.173	8.34109	0	-0.172	11.6675	6.89824	17.5729	-0.173	18.7365	0	-0.172	10.9814	4.27048	18.9287
-0.172	8.23216	0	-0.171	11.8154	6.9495	17.8002	-0.172	18.155	0	-0.171	10.839	4.23344	18.7199
-0.171	8.12491	0	-0.17	11.9677	6.98951	18.0724	-0.171	17.5801	0	-0.17	10.6968	4.19816	18.5468
-0.17	8.01944	0	-0.169	12.1244	7.06078	18.2623	-0.17	17.0123	0	-0.169	10.5548	4.14537	18.3295
-0.169	7.91586	0	-0.168	12.2857	7.15532	18.5944	-0.169	16.4522	0	-0.168	10.4134	4.06998	18.1218
-0.168	7.81427	0	-0.167	12.4514	7.25812	18.8728	-0.168	15.9004	0	-0.167	10.2723	3.97936	17.8726
-0.167	7.71477	0	-0.166	12.6216	7.36168	19.1102	-0.167	15.3573	0	-0.166	10.1316	3.89183	17.6339
-0.166	7.61745	0	-0.165	12.7961	7.46479	19.2985	-0.166	14.8235	0	-0.165	9.99145	3.84492	17.3917
-0.165	7.5224	0	-0.164	12.975	7.628	19.5701	-0.165	14.2995	0	-0.164	9.85193	3.79999	17.1785
-0.164	7.42974	0	-0.163	13.158	7.7469	19.7634	-0.164	13.7859	0	-0.163	9.71321	3.7484	17.0025
-0.163	7.33953	0	-0.162	13.3451	7.88997	20.0247	-0.163	13.2831	0	-0.162	9.57524	3.7046	16.7772
-0.162	7.25187	0	-0.161	13.5361	8.053	20.2476	-0.162	12.7917	0	-0.161	9.43799	3.67648	16.5509
-0.161	7.16685	0	-0.16	13.7309	8.21262	20.4238	-0.161	12.312	0	-0.16	9.30158	3.61446	16.3293
-0.16	7.08456	0	-0.159	13.9294	8.34556	20.5993	-0.16	11.8446	0	-0.159	9.16598	3.53866	16.1159
-0.159	7.00749	0	-0.158	14.1319	8.51355	20.7935	-0.159	11.3875	0	-0.158	9.03097	3.48586	15.9159
-0.158	6.93815	0	-0.157	14.3383	8.73558	21.0533	-0.158	10.9388	0	-0.157	8.89669	3.41854	15.7141
-0.157	6.87663	0	-0.156	14.5486	8.91085	21.3132	-0.157	10.4987	0	-0.156	8.76326	3.34604	15.5106
-0.156	6.82296	0	-0.155	14.7627	9.05523	21.6221	-0.156	10.0679	0	-0.155	8.63047	3.27263	15.3055
-0.155	6.77721	0	-0.154	14.9804	9.2313	21.9376	-0.155	9.64428	0	-0.154	8.49828	3.23398	15.0989
-0.154	6.73943	0	-0.153	15.2015	9.4336	22.2429	-0.154	9.22579	0	-0.153	8.36681	3.18762	14.8908
-0.153	6.70964	0	-0.152	15.4261	9.66585	22.4819	-0.153	8.81287	0	-0.152	8.23602	3.18082	14.6673
-0.152	6.68788	0	-0.151	15.6539	9.8714	22.6969	-0.152	8.40593	0	-0.151	8.10586	3.12668	14.44
-0.151	6.6766	0	-0.15	15.8852	10.0391	22.8924	-0.151	8.00535	0	-0.15	7.97647	3.10535	14.2116
-0.15	6.67824	0	-0.149	16.1201	10.2424	23.105	-0.15	7.61154	0	-0.149	7.84778	3.07376	13.9781
-0.149	6.6928	0	-0.148	16.3584	10.4612	23.335	-0.149	7.22487	0	-0.148	7.71977	3.01109	13.7457
-0.148	6.72027	0	-0.147	16.5997	10.6788	23.5731	-0.148	6.84573	0	-0.147	7.59254	2.95619	13.5463
-0.147	6.76061	0	-0.146	16.8441	10.8966	23.8503	-0.147	6.47448	0	-0.146	7.46623	2.91678	13.3463
-0.146	6.81379	0	-0.145	17.0917	11.1313	24.1345	-0.146	6.11149	0	-0.145	7.34095	2.86059	13.1184
-0.145	6.87976	0	-0.144	17.3425	11.353	24.3868	-0.145	5.75711	0	-0.144	7.21684	2.791	12.8737
-0.144	6.95845	0	-0.143	17.5965	11.5643	24.6887	-0.144	5.41169	0	-0.143	7.09401	2.72356	12.638
-0.143	7.04979	0	-0.142	17.8535	11.7963	24.9291	-0.143	5.07556	0	-0.142	6.97258	2.65831	12.4203
-0.142	7.15368	0	-0.141	18.1133	12.0326	25.1753	-0.142	4.74906	0	-0.141	6.85267	2.61332	12.2251
-0.141	7.27246	0	-0.14	18.3761	12.2693	25.4835	-0.141	4.4325	0	-0.14	6.73423	2.58956	12.0113
-0.14	7.40843	0	-0.139	18.6418	12.52	25.7913	-0.14	4.1262	0	-0.139	6.61719	2.51468	11.8389
-0.139	7.56148	0	-0.138	18.9102	12.7838	26.1134	-0.139	3.83044	0	-0.138	6.50167	2.4598	11.645
-0.138	7.73144	0	-0.137	19.1814	13.0374	26.3711	-0.138	3.54553	0	-0.137	6.38778	2.4204	11.3918
-0.137	7.91815	0	-0.136	19.4553	13.2724	26.6584	-0.137	3.27173	0	-0.136	6.27564	2.38645	11.2117
-0.136	8.12144	0	-0.135	19.7322	13.5099	26.9742	-0.136	3.00933	0	-0.135	6.16536	2.32309	10.9938
-0.135	8.34109	0	-0.134	20.0119	13.7064	27.3254	-0.135	2.75856	0	-0.134	6.05703	2.26583	10.7905
-0.134	8.57933	0	-0.133	20.2949	13.9331	27.6806	-0.134	2.51968	0	-0.133	5.95078	2.21997	10.5738
-0.133	8.83835	0	-0.132	20.5809	14.2061	28.0198	-0.133	2.29293	0	-0.132	5.84669	2.19466	10.3546
-0.132	9.1179	0	-0.131	20.8698	14.492	28.3387	-0.132	2.07852	0	-0.131	5.74454	2.16339	10.143
-0.131	9.41771	0	-0.13	21.1613	14.7567	28.6313	-0.131	1.87666	0	-0.13	5.64406	2.12136	9.94591
-0.13	9.73749	0	-0.129	21.4554	15.0444	28.8651	-0.13	1.68755	0	-0.129	5.54536	2.06502	9.74977
-0.129	10.0769	0	-0.128	21.7519	15.3261	29.0944	-0.129	1.51137	0	-0.128	5.44853	2.00475	9.57519
-0.128	10.4357	0	-0.127	22.0501	15.5999	29.323	-0.128	1.3483	0	-0.127	5.35367	1.96517	9.36852
-0.127	10.8134	0	-0.126	22.3506	15.8709	29.5766	-0.127	1.1985	0	-0.126	5.26087	1.92364	9.19495
-0.126	11.2097	0	-0.125	22.654	16.0866	29.8632	-0.126	1.06211	0	-0.125	5.17022	1.87091	9.01449
-0.125	11.6242	0	-0.124	22.9596	16.3552	30.1643	-0.125	0.93926	0	-0.124	5.08181	1.8335	8.82597
-0.124	12.0566	0	-0.123	23.2672	16.664	30.4345	-0.124	0.82765	0	-0.123	4.99573	1.80321	8.6694
-0.123	12.5063	0	-0.122	23.5766	16.9982	30.6954	-0.123	0.724953	0	-0.122	4.91205	1.78332	8.53141
-0.122	12.973	0	-0.121	23.888	17.2875	30.9857	-0.122	0.63127	0	-0.121	4.83087	1.76795	8.40489
-0.121	13.4586	0	-0.12	24.2015	17.5964	31.2645	-0.121	0.546693	0	-0.12	4.75227	1.75449	8.24036
-0.12	13.9651	0	-0.119	24.5171	17.9343	31.5151	-0.12	0.471303	0	-0.119	4.67631	1.74296	8.07957
-0.119	14.4919	0	-0.118	24.8352	18.2982	31.7671	-0.119	0.405176	0	-0.118	4.60272	1.7332	7.92549
-0.118	15.0386	0	-0.117	25.1558	18.6847	31.989	-0.118	0.345944	0	-0.117	4.53141	1.71291	7.79837
-0.117	15.6047	0	-0.116	25.4785	19.0588	32.2205	-0.117	0.291235	0	-0.116	4.46279	1.69199	7.6446
-0.116	16.1895	0	-0.115	25.803	19.4249	32.534	-0.116	0.241103	0	-0.115	4.3971	1.6529	7.50362
-0.115	16.7926	0	-0.114	26.1291	19.7835	32.8815	-0.115	0.195596	0	-0.114	4.33441	1.63333	7.35318
-0.114	17.4133	0	-0.113	26.4565	20.1028	33.2273	-0.114	0.154759	0	-0.113	4.27477	1.61851	7.2306
-0.113	18.051	0	-0.112	26.7852	20.4522	33.5285	-0.113	0.118633	0	-0.112	4.21825	1.62192	7.12493
-0.112	18.705	0	-0.111	27.115	20.7792	33.8483	-0.112	0.087251	0	-0.111	4.16507	1.62097	7.0022
-0.111	19.3773	0	-0.11	27.4459	21.1002	34.1796	-0.111	0.0606453	0	-0.11	4.11528	1.59311	6.90477
-0.11	20.0695	0	-0.109	27.7777	21.4285	34.416	-0.11	0.0388415	0	-0.109	4.06877	1.58098	6.77655
-0.109	20.781	0	-0.108	28.1104	21.764	34.6282	-0.109	0.0218608	0	-0.108	4.02575	1.58515	6.65409
-0.108	21.5111	0	-0.107	28.4439	22.1565	34.8353	-0.108	0.00971986	0	-0.107	3.98643	1.59716	6.55948
-0.107	22.259	0	-0.106	28.7786	22.5383	35.1334	-0.107	0.00243056	0	-0.106	3.95086	1.58321	6.45809
-0.106	23.0241	0	-0.105	29.1147	22.9227	35.3892	-0.106	0	0	-0.105	3.91889	1.59347	6.36407
-0.105	23.8056	0	-0.104	29.4518	23.3514	35.6112	-0.105	0	0	-0.104	3.89038	1.60006	6.3139
-0.104	24.6027	0	-0.103	29.7899	23.7247	35.8882	-0.104	0	0	-0.103	3.86519	1.62601	6.25919
-0.103	25.4146	0	-0.102	30.1289	24.0781	36.2118	-0.103	0	0	-0.102	3.84317	1.64263	6.20279
-0.102	26.2407	0	-0.101	30.4686	24.4205	36.4909	-0.102	0	0	-0.101	3.82399	1.66728	6.1593
-0.101	27.0799	0	-0.1	30.8088	24.7844	36.7678	-0.101	0	0	-0.1	3.80715	1.70823	6.09978
-0.1	27.9316	0	-0.099	31.1491	25.1695	37.0975	-0.1	0	0	-0.099	3.7925	1.73733	6.03756
-0.099	28.7949	0	-0.098	31.4894	25.5565	37.4389	-0.099	0	0	-0.098	3.78004	1.7744	5.97975
-0.098	29.6665	0	-0.097	31.8292	25.9691	37.7739	-0.098	0	0	-0.097	3.76979	1.82863	5.88311
-0.097	30.5432	0	-0.096	32.1682	26.3248	38.0552	-0.097	0	0	-0.096	3.76176	1.86206	5.83303
-0.096	31.4264	0	-0.095	32.5061	26.6898	38.3251	-0.096	0	0	-0.095	3.75595	1.90066	5.77249
-0.095	32.3179	0	-0.094	32.8428	27.0201	38.6356	-0.095	0	0	-0.094	3.75221	1.93753	5.7298
-0.094	33.2167	0	-0.093	33.178	27.3515	38.9705	-0.094	0	0	-0.093	3.75035	1.98689	5.71944
-0.093	34.1219	0	-0.092	33.5113	27.6927	39.2811	-0.093	0	0	-0.092	3.75022	2.01766	5.68841
-0.092	35.0326	0	-0.091	33.8425	28.0481	39.5696	-0.092	0	0	-0.091	3.75162	2.07392	5.67081
-0.091	35.948	0	-0.09	34.1714	28.4597	39.7758	-0.091	0	0	-0.09	3.75457	2.09508	5.67124
-0.09	36.8672	0	-0.089	34.4983	28.7637	39.9852	-0.09	0	0	-0.089	3.75906	2.1177	5.64938
-0.089	37.7917	0	-0.088	34.8226	29.1119	40.3198	-0.089	0	0	-0.088	3.76509	2.12894	5.64556
-0.088	38.7229	0	-0.087	35.1444	29.4565	40.5758	-0.088	0	0	-0.087	3.77264	2.18022	5.63088
-0.087	39.6602	0	-0.086	35.4634	29.8458	40.8552	-0.087	0	0	-0.086	3.78172	2.17973	5.60156
-0.086	40.6024	0	-0.085	35.7794	30.2244	41.1566	-0.086	0	0	-0.085	3.79231	2.19708	5.59918
-0.085	41.5486	0.000631945	-0.084	36.0922	30.6162	41.4615	-0.085	0	0	-0.084	3.80423	2.18807	5.60706
-0.084	42.4981	0.00252716	-0.083	36.4017	30.9963	41.7481	-0.084	0	0	-0.083	3.81729	2.21585	5.61493
-0.083	43.4497	0.0056838	-0.082	36.7075	31.3316	42.1202	-0.083	0	0	-0.082	3.83149	2.23692	5.64919
-0.082	44.4027	0.0100988	-0.081	37.0094	31.6574	42.4093	-0.082	0	0	-0.081	3.8468	2.25355	5.68946
-0.081	45.356	0.0157678	-0.08	37.3071	31.9992	42.6915	-0.081	0	0	-0.08	3.86321	2.24709	5.68415
-0.08	46.3088	0.0226853	-0.079	37.6003	32.348	42.9586	-0.08	0	0	-0.079	3.88071	2.25366	5.70281
-0.079	47.26	0.0308445	-0.078	37.8887	32.6942	43.2174	-0.079	0	0	-0.078	3.89928	2.2673	5.74199
-0.078	48.2089	0.0402374	-0.077	38.1721	33.0369	43.5014	-0.078	0	0	-0.077	3.91891	2.27177	5.77877
-0.077	49.1544	0.050855	-0.076	38.45	33.3773	43.8079	-0.077	0	0.000631945	-0.076	3.93956	2.29693	5.83363
-0.076	50.0956	0.0626867	-0.075	38.7224	33.6487	44.1455	-0.076	0	0.00252716	-0.075	3.96105	2.32184	5.90496
-0.075	51.0316	0.0757211	-0.074	38.989	33.8962	44.4861	-0.075	0	0.0056838	-0.074	3.98319	2.34905	5.99612
-0.074	51.9615	0.0899454	-0.073	39.2498	34.1316	44.808	-0.074	0	0.0100988	-0.073	4.00594	2.36369	6.07955
-0.073	52.8843	0.105346	-0.072	39.5048	34.3214	45.0733	-0.073	0	0.0157678	-0.072	4.0293	2.37163	6.08913
-0.072	53.7993	0.121907	-0.071	39.7539	34.5958	45.321	-0.072	0	0.0226853	-0.071	4.05324	2.38057	6.14133
-0.071	54.7054	0.139613	-0.07	39.9972	34.8384	45.6328	-0.071	0	0.0308445	-0.07	4.07772	2.36028	6.23514
-0.07	55.6018	0.158446	-0.069	40.2341	35.1507	45.9691	-0.07	0	0.0402374	-0.069	4.10274	2.33873	6.34882
-0.069	56.4877	0.178389	-0.068	40.4641	35.3586	46.2347	-0.069	0	0.050855	-0.068	4.12826	2.33235	6.46271
-0.068	57.3621	0.199421	-0.067	40.6874	35.5597	46.493	-0.068	0	0.0626867	-0.067	4.15426	2.31764	6.56469
-0.067	58.2242	0.221522	-0.066	40.9041	35.6986	46.8113	-0.067	0	0.0757211	-0.066	4.18055	2.30736	6.66953
-0.066	59.0732	0.244671	-0.065	41.1141	35.8454	47.0778	-0.066	0	0.0899454	-0.065	4.20691	2.28793	6.78537
-0.065	59.9082	0.268845	-0.064	41.3172	35.9751	47.3459	-0.065	0	0.105346	-0.064	4.23334	2.25243	6.84951
-0.064	60.7308	0.294019	-0.063	41.5132	36.0893	47.5888	-0.064	0	0.121907	-0.063	4.25979	2.23666	6.95265
-0.063	61.5427	0.320171	-0.062	41.7023	36.1876	47.8703	-0.063	0	0.139613	-0.062	4.28624	2.20634	7.04523
-0.062	62.3431	0.347273	-0.061	41.8844	36.3356	48.1252	-0.062	0	0.158446	-0.061	4.31285	2.20141	7.15768
-0.061	63.1312	0.3753	-0.06	42.0594	36.463	48.4039	-0.061	0	0.178389	-0.06	4.33959	2.17868	7.26104
-0.06	63.9063	0.404224	-0.059	42.2273	36.6346	48.651	-0.06	0	0.199421	-0.059	4.36625	2.17372	7.35668
-0.059	64.6675	0.434017	-0.058	42.3882	36.7136	48.8579	-0.059	0	0.221522	-0.058	4.39281	2.14301	7.44702
-0.058	65.4141	0.46465	-0.057	42.5418	36.7457	49.1161	-0.058	0	0.244671	-0.057	4.41925	2.09745	7.55373
-0.057	66.1454	0.496093	-0.056	42.6879	36.7976	49.3861	-0.057	0	0.268845	-0.056	4.44553	2.05601	7.63737
-0.056	66.8607	0.528315	-0.055	42.8264	36.9152	49.6209	-0.056	0	0.294019	-0.055	4.47164	2.01533	7.711
-0.055	67.5593	0.561284	-0.054	42.957	37.0061	49.8455	-0.055	0	0.320171	-0.054	4.49755	1.98349	7.79381
-0.054	68.2404	0.594969	-0.053	43.0798	37.0787	50.0874	-0.054	0	0.347273	-0.053	4.5234	1.95814	7.8766
-0.053	68.9035	0.629337	-0.052	43.1948	37.1928	50.2497	-0.053	0	0.3753	-0.052	4.54935	1.93792	7.95795
-0.052	69.5479	0.664353	-0.051	43.3017	37.1077	50.3662	-0.052	0	0.404224	-0.051	4.57536	1.91807	8.06832
-0.051	70.173	0.699985	-0.05	43.4009	37.0576	50.5416	-0.051	0	0.434017	-0.05	4.60142	1.88843	8.16115
-0.05	70.7781	0.736196	-0.049	43.4924	37.0929	50.7317	-0.05	0	0.46465	-0.049	4.62749	1.86737	8.24923
-0.049	71.3627	0.772952	-0.048	43.5763	37.0977	50.8806	-0.049	0	0.496093	-0.048	4.65356	1.84745	8.33602
-0.048	71.9261	0.810217	-0.047	43.6527	37.1598	51.041	-0.048	0	0.528315	-0.047	4.6796	1.82462	8.42145
-0.047	72.4679	0.847953	-0.046	43.7217	37.1298	51.2004	-0.047	0	0.561284	-0.046	4.70558	1.80045	8.51389
-0.046	72.9874	0.886125	-0.045	43.7835	37.1038	51.3482	-0.046	0	0.594969	-0.045	4.73147	1.77339	8.62018
-0.045	73.4843	0.924696	-0.044	43.8382	37.0175	51.5043	-0.045	0	0.629337	-0.044	4.75725	1.74449	8.71901
-0.044	73.958	0.963626	-0.043	43.8854	36.9609	51.663	-0.044	0	0.664353	-0.043	4.7829	1.72571	8.81782
-0.043	74.408	1.00288	-0.042	43.9256	36.9294	51.8285	-0.043	0	0.699985	-0.042	4.80822	1.70639	8.91241
-0.042	74.834	1.04242	-0.041	43.9589	36.8938	51.9677	-0.042	0	0.736196	-0.041	4.833	1.69502	8.99658
-0.041	75.2354	1.0822	-0.04	43.9854	36.8297	52.0947	-0.041	0	0.772952	-0.04	4.85741	1.68896	9.07234
-0.04	75.6119	1.12219	-0.039	44.0052	36.7344	52.2073	-0.04	0	0.810217	-0.039	4.88158	1.67364	9.15567
-0.039	75.9632	1.16234	-0.038	44.0184	36.6574	52.3096	-0.039	0	0.847953	-0.038	4.90549	1.65808	9.24565
-0.038	76.2889	1.20263	-0.037	44.0251	36.5687	52.4019	-0.038	0	0.886125	-0.037	4.92913	1.63005	9.30055
-0.037	76.5886	1.243	-0.036	44.0254	36.4781	52.4948	-0.037	0	0.924696	-0.036	4.95246	1.60727	9.38126
-0.036	76.8621	1.28342	-0.035	44.0195	36.3857	52.5513	-0.036	0	0.963626	-0.035	4.97547	1.58696	9.46072
-0.035	77.1091	1.32386	-0.034	44.0074	36.2626	52.6455	-0.035	0	1.00288	-0.034	4.99813	1.5687	9.53245
-0.034	77.3294	1.36426	-0.033	43.9891	36.1229	52.7036	-0.034	0	1.04242	-0.033	5.02042	1.55331	9.60651
-0.033	77.5227	1.40459	-0.032	43.965	35.9788	52.7491	-0.033	0	1.0822	-0.032	5.04232	1.52947	9.65929
-0.032	77.6889	1.44482	-0.031	43.9354	35.8329	52.7966	-0.032	0	1.12219	-0.031	5.06381	1.5119	9.7016
-0.031	77.8278	1.4849	-0.03	43.9004	35.714	52.8385	-0.031	0	1.16234	-0.03	5.08486	1.50805	9.75178
-0.03	77.9393	1.52479	-0.029	43.86	35.6219	52.8587	-0.03	0	1.20263	-0.029	5.10546	1.50307	9.81091
-0.029	78.0232	1.56445	-0.028	43.8143	35.4715	52.8683	-0.029	0	1.243	-0.028	5.12559	1.48057	9.86871
-0.028	78.0795	1.60385	-0.027	43.7634	35.3212	52.8676	-0.028	0	1.28342	-0.027	5.14522	1.4548	9.92346
-0.027	78.1081	1.64295	-0.026	43.7076	35.171	52.8567	-0.027	0	1.32386	-0.026	5.16433	1.43289	9.98037
-0.026	78.109	1.6817	-0.025	43.6467	35.0209	52.8601	-0.026	0	1.36426	-0.025	5.18292	1.41381	10.0404
-0.025	78.0823	1.72008	-0.024	43.5807	34.8706	52.8752	-0.025	0	1.40459	-0.024	5.20095	1.40593	10.0969
-0.024	78.0278	1.75804	-0.023	43.5099	34.7204	52.8858	-0.024	0	1.44482	-0.023	5.21842	1.39945	10.1497
-0.023	77.9457	1.79617	-0.022	43.4343	34.5706	52.9087	-0.023	0	1.4849	-0.022	5.2353	1.3914	10.1889
-0.022	77.836	1.83508	-0.021	43.3541	34.4215	52.9236	-0.022	0	1.52479	-0.021	5.25158	1.38061	10.2227
-0.021	77.6989	1.87473	-0.02	43.2695	34.2734	52.937	-0.021	0	1.56445	-0.02	5.26724	1.3716	10.2528
-0.02	77.5345	1.91507	-0.019	43.1804	34.1263	52.9062	-0.02	0	1.60385	-0.019	5.28227	1.36437	10.29
-0.019	77.343	1.95607	-0.018	43.0871	33.9807	52.8378	-0.019	0	1.64295	-0.018	5.29648	1.35833	10.3268
-0.018	77.1245	1.99768	-0.017	42.9903	33.8373	52.7601	-0.018	0	1.6817	-0.017	5.30968	1.35287	10.3595
-0.017	76.8792	2.03987	-0.016	42.8904	33.6966	52.6737	-0.017	0	1.72008	-0.016	5.32169	1.35774	10.3879
-0.016	76.6075	2.08259	-0.015	42.7874	33.5587	52.5721	-0.016	0	1.75804	-0.015	5.33231	1.37196	10.4118
-0.015	76.3095	2.12581	-0.014	42.6815	33.4329	52.4474	-0.015	0	1.79554	-0.014	5.34155	1.38675	10.4313
-0.014	75.988	2.16948	-0.013	42.5728	33.3322	52.3151	-0.014	0	1.83256	-0.013	5.34938	1.39806	10.4463
-0.013	75.6457	2.21356	-0.012	42.4614	33.2349	52.2006	-0.013	0	1.86904	-0.012	5.35581	1.39621	10.4659
-0.012	75.2829	2.258	-0.011	42.3473	33.1412	52.0661	-0.012	0	1.90497	-0.011	5.36082	1.40665	10.49
-0.011	74.9001	2.30276	-0.01	42.2303	33.0412	51.926	-0.011	0	1.9403	-0.01	5.36442	1.41728	10.4986
-0.01	74.4976	2.3478	-0.009	42.1102	32.9236	51.8226	-0.01	0	1.97499	-0.009	5.36659	1.41372	10.5089
-0.009	74.0757	2.39307	-0.008	41.987	32.8301	51.7252	-0.009	0	2.00903	-0.008	5.36734	1.41067	10.4871
-0.008	73.635	2.43854	-0.007	41.8611	32.7388	51.6239	-0.008	0	2.04236	-0.007	5.36666	1.41349	10.4624
-0.007	73.1758	2.48415	-0.006	41.7329	32.6501	51.5068	-0.007	0	2.07496	-0.006	5.36456	1.41803	10.4418
-0.006	72.6985	2.52985	-0.005	41.6025	32.564	51.3862	-0.006	0	2.10679	-0.005	5.36104	1.42291	10.4171
-0.005	72.2037	2.57562	-0.004	41.4699	32.4477	51.258	-0.005	0	2.13783	-0.004	5.35593	1.42797	10.3881
-0.004	71.6918	2.6214	-0.003	41.3357	32.3344	51.1227	-0.004	0	2.16805	-0.003	5.34905	1.43302	10.3485
-0.003	71.1633	2.66714	-0.002	41.2005	32.2443	50.9768	-0.003	0	2.19741	-0.002	5.34042	1.43806	10.3139
-0.002	70.6188	2.7128	-0.001	41.0647	32.1873	50.8321	-0.002	0	2.22589	-0.001	5.33005	1.44309	10.285
-0.001	70.0587	2.75835	0	40.9285	32.085	50.6774	-0.001	0	2.25346	0	5.31794	1.44809	10.2523
0	69.4837	2.80372	0.001	40.7922	31.984	50.5168	0	0	2.28009	0.001	5.3041	1.45307	10.2159
0.001	68.8943	2.84888	0.002	40.6562	31.8769	50.3507	0.001	0	2.30576	0.002	5.28855	1.43654	10.1757
0.002	68.291	2.89379	0.003	40.5209	31.7458	50.2145	0.002	0	2.33043	0.003	5.27131	1.41999	10.1318
0.003	67.6744	2.9384	0.004	40.3865	31.6378	50.0401	0.003	0	2.3541	0.004	5.2524	1.42019	10.0602
0.004	67.0452	2.98266	0.005	40.2527	31.5652	49.859	0.004	0	2.37673	0.005	5.23182	1.42827	9.98193
0.005	66.4064	3.02654	0.006	40.1198	31.4577	49.6804	0.005	0	2.39829	0.006	5.2096	1.43618	9.90018
0.006	65.761	3.07062	0.007	39.9884	31.3626	49.4965	0.006	0	2.41878	0.007	5.18594	1.44289	9.8151
0.007	65.1097	3.11549	0.008	39.8587	31.3183	49.2994	0.007	0.00243056	2.43817	0.008	5.16103	1.4383	9.72685
0.008	64.4532	3.16111	0.009	39.7311	31.2533	49.129	0.008	0.00971986	2.45645	0.009	5.13489	1.43386	9.63552
0.009	63.792	3.20743	0.01	39.6057	31.1581	48.9	0.009	0.0218608	2.47358	0.01	5.10756	1.43854	9.54119
0.01	63.1267	3.25441	0.011	39.4828	31.0977	48.7572	0.01	0.0388415	2.48957	0.011	5.07906	1.4235	9.45437
0.011	62.4582	3.302	0.012	39.3622	30.9971	48.6308	0.011	0.0606453	2.50501	0.012	5.04941	1.40802	9.37594
0.012	61.7869	3.35016	0.013	39.2436	30.8972	48.4689	0.012	0.087251	2.52054	0.013	5.01865	1.39289	9.29477
0.013	61.1137	3.39883	0.014	39.1272	30.7882	48.2785	0.013	0.118633	2.53613	0.014	4.98681	1.37814	9.21095
0.014	60.439	3.44798	0.015	39.0127	30.6925	48.0351	0.014	0.154759	2.55177	0.015	4.95391	1.36378	9.12455
0.015	59.7636	3.49755	0.016	38.9	30.6025	47.7691	0.015	0.195596	2.56745	0.016	4.91999	1.34534	9.03566
0.016	59.0882	3.54749	0.017	38.7894	30.5178	47.5038	0.016	0.241103	2.58314	0.017	4.88509	1.33629	8.95914
0.017	58.4133	3.59776	0.018	38.681	30.4711	47.3307	0.017	0.291235	2.59884	0.018	4.84923	1.32318	8.8902
0.018	57.7397	3.6483	0.019	38.5745	30.4167	47.1663	0.018	0.345944	2.61453	0.019	4.81245	1.31052	8.82924
0.019	57.0681	3.69907	0.02	38.4701	30.366	46.9733	0.019	0.405176	2.63019	0.02	4.77479	1.29831	8.76572
0.02	56.399	3.75002	0.021	38.3683	30.2985	46.8019	0.02	0.468873	2.6458	0.021	4.73628	1.28657	8.69971
0.021	55.7331	3.8011	0.022	38.2693	30.2251	46.5847	0.021	0.536973	2.66136	0.022	4.69696	1.2753	8.60986
0.022	55.0711	3.85225	0.023	38.1738	30.1488	46.3686	0.022	0.609409	2.67685	0.023	4.65688	1.26453	8.48808
0.023	54.4136	3.90344	0.024	38.0817	30.152	46.1392	0.023	0.686112	2.69225	0.024	4.61606	1.25426	8.35742
0.024	53.7613	3.9546	0.025	37.9927	30.1831	45.8257	0.024	0.767005	2.70755	0.025	4.57456	1.24146	8.24619
0.025	53.1148	4.00568	0.026	37.9073	30.1495	45.6493	0.025	0.852009	2.72273	0.026	4.5324	1.22979	8.13419
0.026	52.4748	4.05665	0.027	37.8255	30.1326	45.4742	0.026	0.941043	2.73778	0.027	4.48963	1.22654	7.98751
0.027	51.8418	4.10744	0.028	37.7473	30.1012	45.3181	0.027	1.03402	2.75268	0.028	4.4463	1.22068	7.84848
0.028	51.214	4.15801	0.029	37.6725	30.0658	45.1311	0.028	1.13084	2.76742	0.029	4.40244	1.22718	7.74402
0.029	50.5897	4.20831	0.03	37.6005	30.0774	44.9563	0.029	1.23143	2.78198	0.03	4.3581	1.23405	7.6746
0.03	49.9694	4.25829	0.031	37.5312	30.0705	44.746	0.03	1.33566	2.79635	0.031	4.31332	1.21617	7.60045
0.031	49.3538	4.3079	0.032	37.4646	30.1188	44.5904	0.031	1.44346	2.81052	0.032	4.26815	1.202	7.49009
0.032	48.7434	4.3571	0.033	37.4006	30.1481	44.4886	0.032	1.55471	2.82446	0.033	4.22262	1.21173	7.39767
0.033	48.1389	4.40583	0.034	37.3395	30.1832	44.4509	0.033	1.6693	2.83818	0.034	4.17679	1.22344	7.29734
0.034	47.5432	4.45467	0.035	37.2817	30.1963	44.4109	0.034	1.78711	2.85165	0.035	4.1307	1.23535	7.2041
0.035	46.9594	4.50422	0.036	37.2275	30.2395	44.3323	0.035	1.90805	2.86487	0.036	4.08439	1.23271	7.10655
0.036	46.3881	4.55443	0.037	37.1772	30.1879	44.3134	0.036	2.03198	2.87781	0.037	4.03791	1.24379	7.01498
0.037	45.8297	4.60524	0.038	37.131	30.1936	44.2579	0.037	2.15879	2.89046	0.038	3.9913	1.23066	6.92886
0.038	45.2849	4.6566	0.039	37.0885	30.3258	44.1752	0.038	2.28834	2.90282	0.039	3.94461	1.21268	6.86531
0.039	44.7543	4.70847	0.04	37.0502	30.2978	44.0996	0.039	2.42053	2.91488	0.04	3.89789	1.18726	6.75715
0.04	44.2382	4.7608	0.041	37.0167	30.2877	44.0248	0.04	2.55521	2.92661	0.041	3.85118	1.16392	6.66373
0.041	43.7372	4.81353	0.042	36.988	30.2919	43.8753	0.041	2.69225	2.93801	0.042	3.80452	1.16386	6.5675
0.042	43.2494	4.86661	0.043	36.9642	30.3644	43.8034	0.042	2.83152	2.94907	0.043	3.75797	1.1644	6.46823
0.043	42.7728	4.91999	0.044	36.9452	30.3943	43.8409	0.043	2.97289	2.95977	0.044	3.71139	1.16519	6.36391
0.044	42.3079	4.97363	0.045	36.9307	30.4212	43.877	0.044	3.11622	2.97011	0.045	3.66466	1.16588	6.29581
0.045	41.8551	5.02745	0.046	36.9204	30.4218	43.7541	0.045	3.26136	2.98008	0.046	3.61782	1.16646	6.19212
0.046	41.4173	5.08142	0.047	36.9145	30.4752	43.7072	0.046	3.40817	2.98966	0.047	3.57091	1.16472	6.08108
0.047	40.9974	5.13548	0.048	36.913	30.5097	43.6064	0.047	3.55652	2.99884	0.048	3.52399	1.13505	5.98439
0.048	40.5958	5.18958	0.049	36.9155	30.5575	43.5105	0.048	3.70625	3.00763	0.049	3.4771	1.10601	5.89969
0.049	40.2128	5.24367	0.05	36.9219	30.5378	43.4498	0.049	3.85723	3.016	0.05	3.43028	1.07763	5.83288
0.05	39.8465	5.29768	0.051	36.932	30.5679	43.4598	0.05	4.00929	3.02396	0.051	3.38359	1.05598	5.72019
0.051	39.4946	5.35158	0.052	36.9459	30.6374	43.5288	0.051	4.1623	3.03149	0.052	3.33706	1.04481	5.65128
0.052	39.1577	5.4053	0.053	36.9642	30.6989	43.5663	0.052	4.3161	3.03858	0.053	3.29074	1.03454	5.58937
0.053	38.836	5.45943	0.054	36.9869	30.7181	43.627	0.053	4.47055	3.04524	0.054	3.24468	1.01583	5.5277
0.054	38.5298	5.51454	0.055	37.014	30.7752	43.7702	0.054	4.62549	3.05144	0.055	3.19892	1.02369	5.46774
0.055	38.2394	5.57058	0.056	37.045	30.8241	43.8582	0.055	4.78077	3.05719	0.056	3.1535	1.02055	5.40714
0.056	37.9652	5.62751	0.057	37.0798	30.8802	43.9083	0.056	4.93624	3.06249	0.057	3.10848	0.989328	5.32604
0.057	37.7073	5.68525	0.058	37.1184	30.9267	43.9049	0.057	5.09175	3.06731	0.058	3.06389	0.96042	5.24616
0.058	37.466	5.74375	0.059	37.161	30.9662	43.9459	0.058	5.24715	3.07167	0.059	3.01979	0.938014	5.18354
0.059	37.2416	5.80297	0.06	37.2075	31.0519	43.9611	0.059	5.40228	3.07556	0.06	2.9762	0.916253	5.11679
0.06	37.0319	5.86283	0.061	37.2573	31.0982	44.0234	0.06	5.55699	3.07897	0.061	2.93318	0.903948	5.05025
0.061	36.8346	5.92328	0.062	37.3105	31.0942	44.1439	0.061	5.71114	3.08189	0.062	2.89076	0.905236	4.98398
0.062	36.6499	5.98427	0.063	37.3671	31.1209	44.27	0.062	5.86456	3.08434	0.063	2.84899	0.879435	4.92058
0.063	36.4804	6.04573	0.064	37.4274	31.1672	44.4064	0.063	6.01712	3.08629	0.064	2.80791	0.847911	4.86366
0.064	36.3288	6.1076	0.065	37.491	31.1993	44.4947	0.064	6.16865	3.08776	0.065	2.76756	0.828328	4.7968
0.065	36.1952	6.16982	0.066	37.5576	31.2362	44.5964	0.065	6.31902	3.08875	0.066	2.72797	0.80531	4.73552
0.066	36.0796	6.23233	0.067	37.6267	31.3348	44.6598	0.066	6.46808	3.08924	0.067	2.6892	0.781774	4.68329
0.067	35.9799	6.29508	0.068	37.6979	31.4309	44.7343	0.067	6.61568	3.08924	0.068	2.65126	0.756778	4.63067
0.068	35.8936	6.35799	0.069	37.7712	31.4939	44.8347	0.068	6.76168	3.08875	0.069	2.61421	0.73512	4.57139
0.069	35.8208	6.42101	0.07	37.8465	31.5441	44.8499	0.069	6.90593	3.08776	0.07	2.57808	0.715005	4.52243
0.07	35.7617	6.48407	0.071	37.9235	31.5985	44.8886	0.07	7.04829	3.08629	0.071	2.5429	0.694101	4.49033
0.071	35.7162	6.54712	0.072	38.0021	31.7225	45.011	0.071	7.18863	3.08434	0.072	2.50871	0.673908	4.43422
0.072	35.6844	6.61009	0.073	38.0829	31.7643	45.1009	0.072	7.32681	3.08189	0.073	2.47554	0.6598	4.37926
0.073	35.6664	6.67292	0.074	38.166	31.8459	45.1768	0.073	7.46269	3.07897	0.074	2.44325	0.653638	4.33009
0.074	35.6621	6.73618	0.075	38.251	31.9306	45.2598	0.074	7.59613	3.07556	0.075	2.41169	0.641588	4.26998
0.075	35.6716	6.80045	0.076	38.3372	31.993	45.3411	0.075	7.72702	3.07167	0.076	2.38108	0.639258	4.21633
0.076	35.6949	6.86565	0.077	38.4249	32.0466	45.4705	0.076	7.85765	3.06731	0.077	2.35144	0.617582	4.16046
0.077	35.7319	6.93173	0.078	38.5139	32.131	45.6043	0.077	7.99032	3.06249	0.078	2.32263	0.593208	4.11823
0.078	35.785	6.99862	0.079	38.604	32.278	45.7345	0.078	8.12491	3.05719	0.079	2.29468	0.594423	4.07741
0.079	35.8567	7.06625	0.08	38.6953	32.4499	45.8552	0.079	8.26128	3.05144	0.08	2.2676	0.578841	4.05631
0.08	35.9443	7.13457	0.081	38.7877	32.546	45.9103	0.08	8.3993	3.04524	0.081	2.24144	0.559017	4.03285
0.081	36.0454	7.20349	0.082	38.8805	32.5865	46.0317	0.081	8.53884	3.03858	0.082	2.21621	0.540731	4.00319
0.082	36.1599	7.27296	0.083	38.9734	32.6248	46.1501	0.082	8.67976	3.03149	0.083	2.19194	0.524	3.97664
0.083	36.2878	7.34291	0.084	39.0662	32.6714	46.2658	0.083	8.82191	3.02396	0.084	2.16848	0.508667	3.948
0.084	36.4287	7.41326	0.085	39.159	32.7002	46.3795	0.084	8.96517	3.016	0.085	2.14551	0.494225	3.88846
0.085	36.5827	7.48396	0.086	39.2518	32.8033	46.4913	0.085	9.1094	3.00763	0.086	2.12287	0.480342	3.8588
0.086	36.7495	7.55493	0.087	39.3446	32.9644	46.5957	0.086	9.25444	2.99884	0.087	2.10059	0.467032	3.82038
0.087	36.9291	7.62609	0.088	39.4373	33.0595	46.7002	0.087	9.40016	2.98966	0.088	2.07868	0.454307	3.78924
0.088	37.1211	7.6974	0.089	39.5302	33.1683	46.8023	0.088	9.54643	2.98071	0.089	2.05717	0.44218	3.75942
0.089	37.3256	7.76876	0.09	39.6235	33.243	46.9025	0.089	9.69308	2.97264	0.09	2.03592	0.430488	3.73454
0.09	37.5397	7.84011	0.091	39.7166	33.3069	47.0001	0.09	9.83999	2.96545	0.091	2.01475	0.419071	3.73601
0.091	37.7609	7.91202	0.092	39.8092	33.3797	47.0994	0.091	9.987	2.95917	0.092	1.9937	0.407938	3.7357
0.092	37.9889	7.98505	0.093	39.9008	33.4396	47.222	0.092	10.134	2.95378	0.093	1.97261	0.396928	3.71383
0.093	38.2236	8.05912	0.094	39.9915	33.532	47.3287	0.093	10.2808	2.94929	0.094	1.95133	0.385877	3.69164
0.094	38.4647	8.13417	0.095	40.0812	33.6	47.4115	0.094	10.4273	2.94572	0.095	1.92988	0.374796	3.67196
0.095	38.7119	8.21011	0.096	40.1695	33.6887	47.4913	0.095	10.5733	2.94306	0.096	1.90828	0.363697	3.66546
0.096	38.9675	8.28688	0.097	40.2569	33.7983	47.5686	0.096	10.7187	2.94132	0.097	1.88655	0.352589	3.64139
0.097	39.2337	8.3644	0.098	40.3438	33.8666	47.6383	0.097	10.8633	2.94049	0.098	1.86472	0.341484	3.6325
0.098	39.5101	8.44259	0.099	40.4297	33.9315	47.7057	0.098	11.0071	2.94059	0.099	1.8428	0.330392	3.64104
0.099	39.7965	8.52138	0.1	40.5147	33.9759	47.7159	0.099	11.1498	2.9416	0.1	1.82081	0.319325	3.62411
0.1	40.0927	8.6007	0.101	40.5986	34.0415	47.7517	0.1	11.2914	2.94353	0.101	1.79878	0.308293	3.59733
0.101	40.3983	8.68045	0.102	40.6814	34.1181	47.8475	0.101	11.4316	2.94637	0.102	1.77673	0.297307	3.59339
0.102	40.713	8.76058	0.103	40.7629	34.1609	47.95	0.102	11.5704	2.95013	0.103	1.75468	0.286378	3.59372
0.103	41.0366	8.84099	0.104	40.8427	34.1998	48.0205	0.103	11.7076	2.95479	0.104	1.73283	0.275863	3.56246
0.104	41.3686	8.9216	0.105	40.9208	34.2544	48.0732	0.104	11.8431	2.96037	0.105	1.71154	0.266121	3.5431
0.105	41.7065	9.00235	0.106	40.9969	34.3104	48.1044	0.105	11.9768	2.96684	0.106	1.691	0.25716	3.51658
0.106	42.0473	9.08315	0.107	41.071	34.384	48.1267	0.106	12.1084	2.9742	0.107	1.67125	0.24899	3.50925
0.107	42.3908	9.16393	0.108	41.1431	34.4661	48.1696	0.107	12.238	2.98245	0.108	1.65229	0.241618	3.53944
0.108	42.7366	9.24459	0.109	41.2136	34.5495	48.2085	0.108	12.3653	2.99157	0.109	1.63415	0.235051	3.57488
0.109	43.0869	9.3257	0.11	41.2829	34.6223	48.244	0.109	12.4903	3.00157	0.11	1.61684	0.229297	3.61212
0.11	43.4437	9.40781	0.111	41.3509	34.667	48.2701	0.11	12.6128	3.01242	0.111	1.60039	0.22436	3.6453
0.111	43.8066	9.49084	0.112	41.4178	34.7127	48.3049	0.111	12.7326	3.02412	0.112	1.5848	0.220246	3.64384
0.112	44.1729	9.57471	0.113	41.4836	34.794	48.3305	0.112	12.8498	3.03666	0.113	1.57009	0.216958	3.63567
0.113	44.5398	9.65934	0.114	41.5481	34.8979	48.3588	0.113	12.9641	3.05003	0.114	1.55628	0.206209	3.62785
0.114	44.9069	9.74463	0.115	41.6114	35.004	48.4727	0.114	13.0755	3.0642	0.115	1.54338	0.190809	3.61986
0.115	45.2739	9.83052	0.116	41.6736	35.1062	48.5456	0.115	13.1838	3.07918	0.116	1.5314	0.18314	3.61849
0.116	45.6404	9.91628	0.117	41.7347	35.1569	48.5636	0.116	13.289	3.09493	0.117	1.52036	0.178632	3.61757
0.117	46.0061	10.0012	0.118	41.7946	35.1886	48.6088	0.117	13.3909	3.11145	0.118	1.51026	0.174644	3.6034
0.118	46.3706	10.0852	0.119	41.8534	35.2214	48.6425	0.118	13.4895	3.12873	0.119	1.50111	0.17118	3.58971
0.119	46.7335	10.1682	0.12	41.9114	35.2556	48.6613	0.119	13.5845	3.14674	0.12	1.49293	0.168243	3.57651
0.12	47.0945	10.2501	0.121	41.9688	35.2919	48.7201	0.12	13.6761	3.16547	0.121	1.48573	0.164358	3.5638
0.121	47.4532	10.3308	0.122	42.0254	35.3505	48.7745	0.121	13.764	3.18489	0.122	1.4795	0.152112	3.56345
0.122	47.8093	10.4103	0.123	42.0816	35.4507	48.7885	0.122	13.8481	3.205	0.123	1.47425	0.138934	3.56362
0.123	48.1625	10.4885	0.124	42.1377	35.5737	48.8411	0.123	13.9285	3.22576	0.124	1.47017	0.126314	3.56447
0.124	48.5123	10.5658	0.125	42.1935	35.6988	48.9132	0.124	14.005	3.24653	0.125	1.46743	0.114265	3.56617
0.125	48.8585	10.643	0.126	42.2493	35.759	48.9876	0.125	14.0775	3.26666	0.126	1.46621	0.117247	3.58989
0.126	49.2007	10.7199	0.127	42.3051	35.7923	49.0699	0.126	14.146	3.28613	0.127	1.46668	0.116985	3.61443
0.127	49.5386	10.7964	0.128	42.361	35.7978	49.1525	0.127	14.2104	3.30491	0.128	1.46884	0.104024	3.63979
0.128	49.8718	10.8725	0.129	42.4171	35.7896	49.1969	0.128	14.2706	3.32299	0.129	1.47269	0.0920037	3.66593
0.129	50.2001	10.9481	0.13	42.4729	35.7982	49.2249	0.129	14.3266	3.34035	0.13	1.47823	0.0812821	3.69282
0.13	50.523	11.0231	0.131	42.5281	35.8658	49.2578	0.13	14.3783	3.35698	0.131	1.48545	0.072575	3.72045
0.131	50.8403	11.0974	0.132	42.5829	35.9584	49.4081	0.131	14.4257	3.37285	0.132	1.49434	0.0680134	3.73652
0.132	51.1517	11.171	0.133	42.6373	36.0577	49.4643	0.132	14.4687	3.38795	0.133	1.5049	0.0649477	3.7467
0.133	51.4569	11.2438	0.134	42.691	36.1513	49.4829	0.133	14.5073	3.40228	0.134	1.51711	0.0633811	3.75807
0.134	51.7556	11.3157	0.135	42.7437	36.1963	49.5053	0.134	14.5415	3.4158	0.135	1.53097	0.0633151	3.77698
0.135	52.0474	11.3867	0.136	42.7957	36.2413	49.5281	0.135	14.5711	3.42852	0.136	1.54645	0.063969	3.80297
0.136	52.3321	11.4567	0.137	42.8472	36.2865	49.5519	0.136	14.5963	3.44041	0.137	1.56355	0.0598478	3.82975
0.137	52.607	11.5256	0.138	42.8978	36.3316	49.5634	0.137	14.6169	3.45147	0.138	1.58224	0.0582295	3.85731
0.138	52.8694	11.5933	0.139	42.9471	36.3855	49.6541	0.138	14.633	3.46169	0.139	1.60269	0.0673291	3.8857
0.139	53.1191	11.6598	0.14	42.995	36.4724	49.715	0.139	14.6444	3.47168	0.14	1.62487	0.078099	3.91498
0.14	53.3557	11.725	0.141	43.0414	36.5714	49.7471	0.14	14.6513	3.48208	0.141	1.64859	0.0901815	3.94512
0.141	53.5791	11.7889	0.142	43.0861	36.5734	49.7493	0.141	14.6536	3.49286	0.142	1.67382	0.103565	3.9761
0.142	53.789	11.852	0.143	43.1289	36.6437	49.7211	0.142	14.6513	3.50402	0.143	1.70054	0.118236	4.00787
0.143	53.9852	11.9149	0.144	43.17	36.7412	49.7419	0.143	14.6444	3.51555	0.144	1.72873	0.13418	4.04042
0.144	54.1676	11.9776	0.145	43.2095	36.7724	49.8066	0.144	14.633	3.52743	0.145	1.75835	0.151382	4.07371
0.145	54.3384	12.0399	0.146	43.2482	36.7483	49.8965	0.145	14.6169	3.53966	0.146	1.78938	0.169825	4.10771
0.146	54.4998	12.1018	0.147	43.2866	36.7428	49.9817	0.146	14.5963	3.55223	0.147	1.82178	0.189491	4.14238
0.147	54.6518	12.1632	0.148	43.3246	36.7804	50.0362	0.147	14.5711	3.56511	0.148	1.85536	0.210361	4.17743
0.148	54.794	12.2242	0.149	43.362	36.7801	50.0898	0.148	14.5415	3.57831	0.149	1.8899	0.232414	4.2078
0.149	54.9265	12.2846	0.15	43.3991	36.7687	50.1426	0.149	14.5073	3.59179	0.15	1.92537	0.255629	4.22398
0.15	55.0491	12.3444	0.151	43.4357	36.802	50.1943	0.15	14.4687	3.60556	0.151	1.96174	0.279983	4.242
0.151	55.1617	12.4034	0.152	43.4715	36.8188	50.2652	0.151	14.4257	3.6196	0.152	1.99897	0.305453	4.25952
0.152	55.264	12.4618	0.153	43.5064	36.8431	50.391	0.152	14.3783	3.6339	0.153	2.03702	0.332013	4.282
0.153	55.3562	12.5193	0.154	43.5406	36.8444	50.5142	0.153	14.3266	3.64843	0.154	2.07604	0.359724	4.33233
0.154	55.438	12.576	0.155	43.5736	36.8763	50.5896	0.154	14.2706	3.6632	0.155	2.11615	0.375144	4.39351
0.155	55.5094	12.6317	0.156	43.6053	36.8974	50.6336	0.155	14.2104	3.67817	0.156	2.15732	0.386658	4.4397
0.156	55.5703	12.6865	0.157	43.6353	36.917	50.696	0.156	14.146	3.69334	0.157	2.1995	0.398315	4.48254
0.157	55.6231	12.7409	0.158	43.6638	36.8682	50.7717	0.157	14.0775	3.7087	0.158	2.24266	0.410104	4.56182
0.158	55.6701	12.7955	0.159	43.6908	36.7785	50.8253	0.158	14.005	3.72422	0.159	2.28676	0.422013	4.6243
0.159	55.7114	12.8503	0.16	43.7163	36.7215	50.8634	0.159	13.9285	3.7399	0.16	2.33175	0.434031	4.65949
0.16	55.7468	12.9051	0.161	43.7403	36.7252	50.8997	0.16	13.8481	3.75571	0.161	2.37741	0.446145	4.6948
0.161	55.7764	12.9599	0.162	43.7632	36.701	50.913	0.161	13.764	3.77165	0.162	2.42352	0.458344	4.72909
0.162	55.8001	13.0147	0.163	43.7849	36.6469	50.9205	0.162	13.6761	3.78769	0.163	2.47004	0.470617	4.77119
0.163	55.8179	13.0695	0.164	43.8053	36.6351	50.9687	0.163	13.5845	3.80382	0.164	2.51693	0.48295	4.80563
0.164	55.8298	13.1241	0.165	43.8243	36.6542	51.0528	0.164	13.4895	3.82003	0.165	2.56414	0.495332	4.86331
0.165	55.8357	13.1785	0.166	43.8419	36.635	51.1493	0.165	13.3909	3.83629	0.166	2.61162	0.507751	4.92654
0.166	55.8357	13.2327	0.167	43.8584	36.6149	51.2644	0.166	13.289	3.8526	0.167	2.65932	0.520195	4.96792
0.167	55.8297	13.2866	0.168	43.8737	36.536	51.3336	0.167	13.1838	3.86894	0.168	2.70721	0.532651	5.02642
0.168	55.8178	13.3402	0.169	43.8876	36.446	51.3577	0.168	13.0755	3.88529	0.169	2.75523	0.547254	5.10023
0.169	55.8	13.3933	0.17	43.9001	36.4021	51.4258	0.169	12.9641	3.90164	0.17	2.80333	0.570417	5.14612
0.17	55.7762	13.446	0.171	43.9113	36.3755	51.4748	0.17	12.8498	3.91796	0.171	2.85164	0.594237	5.2002
0.171	55.7466	13.4982	0.172	43.9214	36.271	51.5291	0.171	12.7326	3.93425	0.172	2.9003	0.624944	5.27782
0.172	55.7111	13.5499	0.173	43.9304	36.1851	51.6194	0.172	12.6128	3.95048	0.173	2.94924	0.660253	5.33366
0.173	55.6698	13.601	0.174	43.9388	36.1259	51.6748	0.173	12.4903	3.96665	0.174	2.99843	0.697001	5.39126
0.174	55.6227	13.652	0.175	43.9469	36.0686	51.7012	0.174	12.3653	3.98273	0.175	3.04782	0.735151	5.46134
0.175	55.5698	13.7036	0.176	43.9549	36.0304	51.7462	0.175	12.238	3.99871	0.176	3.09752	0.769814	5.48325
0.176	55.5113	13.7557	0.177	43.9628	36.0237	51.7729	0.176	12.1084	4.01458	0.177	3.14767	0.806593	5.49499
0.177	55.4472	13.8083	0.178	43.9706	35.9507	51.8183	0.177	11.9768	4.03032	0.178	3.19822	0.844177	5.57347
0.178	55.3775	13.8607	0.179	43.9781	35.8959	51.861	0.178	11.8431	4.04591	0.179	3.24911	0.872636	5.64516
0.179	55.3023	13.9122	0.18	43.9853	35.8708	51.9172	0.179	11.7076	4.06134	0.18	3.3003	0.892049	5.69095
0.18	55.2216	13.9627	0.181	43.9918	35.8478	51.9719	0.18	11.5704	4.07659	0.181	3.35174	0.925369	5.76502
0.181	55.1356	14.0122	0.182	43.9977	35.857	51.9992	0.181	11.4316	4.09165	0.182	3.40338	0.960041	5.85788
0.182	55.0444	14.0606	0.183	44.0027	35.8502	52.0907	0.182	11.2914	4.1065	0.183	3.45516	0.981556	5.93383
0.183	54.948	14.108	0.184	44.0067	35.7844	52.1111	0.183	11.1498	4.12114	0.184	3.50704	1.01656	6.01648
0.184	54.8465	14.1542	0.185	44.0093	35.7196	52.165	0.184	11.0071	4.13553	0.185	3.55897	1.04568	6.11095
0.185	54.7425	14.1992	0.186	44.0107	35.6948	52.1941	0.185	10.8633	4.14968	0.186	3.61089	1.08675	6.23312
0.186	54.6384	14.2429	0.187	44.0113	35.6333	52.2076	0.186	10.7187	4.16357	0.187	3.66275	1.11872	6.32639
0.187	54.532	14.2854	0.188	44.0113	35.652	52.2314	0.187	10.5733	4.17718	0.188	3.71451	1.14876	6.43569
0.188	54.4209	14.3273	0.189	44.0105	35.6742	52.3044	0.188	10.4273	4.1905	0.189	3.76611	1.17846	6.53725
0.189	54.3053	14.369	0.19	44.0088	35.5606	52.3226	0.189	10.2808	4.20352	0.19	3.8175	1.20704	6.63723
0.19	54.1852	14.4105	0.191	44.0065	35.4927	52.3061	0.19	10.134	4.21622	0.191	3.86864	1.2492	6.71099
0.191	54.0608	14.4519	0.192	44.0038	35.4682	52.3057	0.191	9.987	4.22859	0.192	3.91946	1.29271	6.81498
0.192	53.9322	14.4931	0.193	44.0006	35.4908	52.3173	0.192	9.83999	4.24063	0.193	3.96993	1.33671	6.93669
0.193	53.8019	14.5341	0.194	43.9969	35.5057	52.3482	0.193	9.69308	4.25231	0.194	4.02	1.35721	7.03555
0.194	53.6725	14.5747	0.195	43.9929	35.4704	52.42	0.194	9.54643	4.26363	0.195	4.0696	1.37707	7.07861
0.195	53.5442	14.615	0.196	43.9892	35.4211	52.4961	0.195	9.40016	4.27457	0.196	4.11871	1.39819	7.1408
0.196	53.417	14.6549	0.197	43.9863	35.3856	52.5654	0.196	9.25444	4.28513	0.197	4.16726	1.41586	7.20884
0.197	53.2911	14.6944	0.198	43.9838	35.3599	52.6428	0.197	9.1094	4.29593	0.198	4.21521	1.43467	7.31524
0.198	53.1666	14.7334	0.199	43.9813	35.3359	52.6939	0.198	8.96517	4.30758	0.199	4.26251	1.46258	7.40821
0.199	53.0436	14.772	0.2	43.979	35.3137	52.7815	0.199	8.82191	4.32009	0.2	4.30913	1.47578	7.46298
0.2	52.9222	14.81	0.201	43.9765	35.2536	52.7886	0.2	8.67976	4.33342	0.201	4.355	1.50158	7.50438
0.201	52.8027	14.8474	0.202	43.9738	35.2532	52.7625	0.201	8.53884	4.34758	0.202	4.40009	1.52879	7.54716
0.202	52.685	14.8843	0.203	43.9709	35.1875	52.8084	0.202	8.3993	4.36254	0.203	4.44436	1.55624	7.60347
0.203	52.5693	14.9205	0.204	43.9677	35.1899	52.9359	0.203	8.26128	4.3783	0.204	4.48775	1.57191	7.65739
0.204	52.4557	14.9566	0.205	43.9642	35.198	53.0179	0.204	8.12491	4.39484	0.205	4.53023	1.58446	7.70886
0.205	52.3443	14.9934	0.206	43.9605	35.2087	53.1507	0.205	7.99032	4.41213	0.206	4.57193	1.59685	7.77714
0.206	52.2352	15.0306	0.207	43.9565	35.2203	53.1453	0.206	7.85765	4.43017	0.207	4.61299	1.60942	7.86719
0.207	52.1286	15.0677	0.208	43.9525	35.1909	53.1418	0.207	7.72702	4.44894	0.208	4.65318	1.62272	7.96121
0.208	52.0245	15.1039	0.209	43.9486	35.1627	53.162	0.208	7.59613	4.46842	0.209	4.6923	1.64533	8.03717
0.209	51.9231	15.1393	0.21	43.9451	35.1267	53.1781	0.209	7.46269	4.48859	0.21	4.7303	1.65245	8.12384
0.21	51.8244	15.1738	0.211	43.9423	35.0946	53.1914	0.21	7.32681	4.50942	0.211	4.76716	1.66538	8.20794
0.211	51.731	15.2074	0.212	43.9401	35.0936	53.2582	0.211	7.18863	4.53091	0.212	4.80283	1.68337	8.26914
0.212	51.6453	15.2401	0.213	43.9391	35.0942	53.3208	0.212	7.04829	4.55239	0.213	4.83727	1.69615	8.32647
0.213	51.5676	15.2717	0.214	43.9396	35.0892	53.3753	0.213	6.90593	4.57322	0.214	4.87047	1.70813	8.38088
0.214	51.4977	15.3023	0.215	43.9417	35.0624	53.3207	0.214	6.76168	4.59336	0.215	4.90238	1.72987	8.4368
0.215	51.4359	15.3319	0.216	43.9452	35.0163	53.3506	0.215	6.61568	4.61282	0.216	4.93297	1.74033	8.47138
0.216	51.3822	15.3604	0.217	43.9506	34.9753	53.3639	0.216	6.46808	4.63155	0.217	4.96221	1.75048	8.51894
0.217	51.3366	15.3878	0.218	43.9579	35.0141	53.3386	0.217	6.31902	4.64956	0.218	4.99008	1.76735	8.57141
0.218	51.2992	15.4147	0.219	43.9672	35.006	53.3709	0.218	6.16865	4.66681	0.219	5.01654	1.78127	8.58011
0.219	51.2699	15.4417	0.22	43.9783	34.9781	53.4428	0.219	6.01712	4.68329	0.22	5.04157	1.7818	8.58411
0.22	51.2489	15.4688	0.221	43.991	34.963	53.499	0.22	5.86456	4.69899	0.221	5.06515	1.7777	8.59276
0.221	51.2362	15.4959	0.222	44.0052	34.9572	53.5383	0.221	5.71114	4.71389	0.222	5.08726	1.79227	8.59515
0.222	51.2318	15.5231	0.223	44.0206	34.9773	53.6522	0.222	5.55699	4.72798	0.223	5.10786	1.82105	8.61622
0.223	51.2356	15.5502	0.224	44.037	34.9583	53.7147	0.223	5.40228	4.74124	0.224	5.12695	1.83141	8.64208
0.224	51.2477	15.5774	0.225	44.0542	34.9911	53.7215	0.224	5.24715	4.75365	0.225	5.14449	1.83672	8.68609
0.225	51.268	15.6044	0.226	44.0726	35.0392	53.7513	0.225	5.09175	4.76522	0.226	5.16049	1.85303	8.71311
0.226	51.2966	15.6314	0.227	44.0919	35.1364	53.8146	0.226	4.93624	4.77592	0.227	5.17491	1.87441	8.71689
0.227	51.3334	15.6583	0.228	44.1123	35.1597	53.8259	0.227	4.78077	4.78574	0.228	5.18775	1.89569	8.75731
0.228	51.3784	15.6851	0.229	44.1336	35.2237	53.7998	0.228	4.62549	4.79468	0.229	5.199	1.91685	8.82203
0.229	51.4315	15.7117	0.23	44.156	35.2147	53.766	0.229	4.47055	4.80273	0.23	5.20863	1.95103	8.88386
0.23	51.4927	15.7381	0.231	44.1793	35.209	53.7478	0.23	4.3161	4.80987	0.231	5.21665	1.95692	8.90897
0.231	51.5619	15.7643	0.232	44.2033	35.2185	53.7513	0.231	4.1623	4.81674	0.232	5.22304	1.96196	8.92011
0.232	51.6391	15.7903	0.233	44.2281	35.2451	53.7799	0.232	4.00929	4.82396	0.233	5.22781	1.94915	8.92774
0.233	51.7242	15.816	0.234	44.2539	35.2782	53.8136	0.233	3.85723	4.83152	0.234	5.23093	1.93639	8.93186
0.234	51.817	15.8414	0.235	44.2806	35.3271	53.8588	0.234	3.70625	4.83942	0.235	5.23242	1.93908	8.93246
0.235	51.9151	15.8665	0.236	44.3076	35.3785	53.8826	0.235	3.55652	4.84764	0.236	5.23227	1.93729	8.93504
0.236	52.016	15.8913	0.237	44.3347	35.4377	53.9045	0.236	3.40817	4.85619	0.237	5.23048	1.92841	8.93988
0.237	52.1195	15.9157	0.238	44.3618	35.5088	53.9291	0.237	3.26136	4.86504	0.238	5.22705	1.91498	8.9752
0.238	52.228	15.9397	0.239	44.3887	35.5825	53.9034	0.238	3.11622	4.87419	0.239	5.22198	1.90629	8.99122
0.239	52.3438	15.9633	0.24	44.416	35.6548	53.9075	0.239	2.97289	4.88364	0.24	5.21529	1.89748	9.00401
0.24	52.4667	15.9865	0.241	44.4434	35.6839	53.9082	0.24	2.83152	4.89337	0.241	5.20697	1.89082	8.99179
0.241	52.5968	16.0092	0.242	44.4705	35.7042	53.905	0.241	2.69225	4.90338	0.242	5.19703	1.89443	8.97344
0.242	52.7338	16.0315	0.243	44.497	35.7496	53.7763	0.242	2.55521	4.91365	0.243	5.18549	1.90131	8.95171
0.243	52.8776	16.0532	0.244	44.5226	35.7779	53.6754	0.243	2.42053	4.92418	0.244	5.17236	1.91529	8.92461
0.244	53.028	16.0745	0.245	44.5471	35.7929	53.7092	0.244	2.28834	4.93494	0.245	5.15764	1.90311	8.89234
0.245	53.185	16.0952	0.246	44.5705	35.8527	53.7788	0.245	2.15879	4.94595	0.246	5.14153	1.889	8.85711
0.246	53.3484	16.1153	0.247	44.5931	35.9143	53.8551	0.246	2.03198	4.95717	0.247	5.12421	1.86259	8.82381
0.247	53.5155	16.1349	0.248	44.6151	35.9584	53.9421	0.247	1.90805	4.96861	0.248	5.10571	1.83495	8.82848
0.248	53.6838	16.1545	0.249	44.6364	36.0521	54.0247	0.248	1.78711	4.98025	0.249	5.08604	1.81366	8.74973
0.249	53.8532	16.1747	0.25	44.6573	36.1143	54.0752	0.249	1.6693	4.99208	0.25	5.06522	1.80995	8.69689
0.25	54.0233	16.1956	0.251	44.6777	36.2221	54.0962	0.25	1.55471	5.00408	0.251	5.04327	1.78166	8.68358
0.251	54.1942	16.2171	0.252	44.6982	36.3101	54.0893	0.251	1.44346	5.01626	0.252	5.02038	1.76627	8.68851
0.252	54.3656	16.2391	0.253	44.719	36.3464	54.0985	0.252	1.33566	5.02858	0.253	4.99676	1.76019	8.66135
0.253	54.5373	16.2617	0.254	44.7396	36.3799	54.1077	0.253	1.23143	5.04105	0.254	4.97242	1.75471	8.63147
0.254	54.7093	16.2843	0.255	44.76	36.4109	54.1317	0.254	1.13084	5.05365	0.255	4.94739	1.74306	8.59887
0.255	54.8812	16.3061	0.256	44.78	36.4237	54.1765	0.255	1.03402	5.06637	0.256	4.92169	1.74641	8.55188
0.256	55.053	16.3271	0.257	44.7996	36.4588	54.2169	0.256	0.941043	5.07919	0.257	4.89535	1.74361	8.46845
0.257	55.2245	16.3473	0.258	44.8187	36.4518	54.2529	0.257	0.852009	5.0921	0.258	4.86839	1.74171	8.41918
0.258	55.3955	16.3668	0.259	44.8369	36.4729	54.2754	0.258	0.767005	5.1051	0.259	4.84084	1.74071	8.39428
0.259	55.5658	16.3854	0.26	44.854	36.5133	54.2712	0.259	0.686112	5.11816	0.26	4.81273	1.74061	8.34001
0.26	55.7353	16.4031	0.261	44.8702	36.5455	54.2724	0.26	0.609409	5.13128	0.261	4.78409	1.74142	8.2828
0.261	55.9039	16.42	0.262	44.8857	36.5843	54.1854	0.261	0.536973	5.14444	0.262	4.75493	1.74313	8.21182
0.262	56.0712	16.436	0.263	44.901	36.6236	54.1144	0.262	0.468873	5.15762	0.263	4.7253	1.74255	8.15215
0.263	56.2373	16.4512	0.264	44.916	36.6633	54.0827	0.263	0.405176	5.17083	0.264	4.69521	1.74472	8.10142
0.264	56.3994	16.466	0.265	44.9303	36.7032	54.1089	0.264	0.345944	5.18403	0.265	4.66471	1.74762	8.06851
0.265	56.5551	16.4812	0.266	44.9437	36.7432	54.1138	0.265	0.291235	5.19723	0.266	4.63381	1.77314	8.03608
0.266	56.7041	16.4968	0.267	44.9564	36.7832	54.1873	0.266	0.241103	5.21041	0.267	4.60255	1.78409	7.96198
0.267	56.8463	16.5126	0.268	44.9681	36.841	54.2109	0.267	0.195596	5.22418	0.268	4.57097	1.76148	7.86818
0.268	56.9816	16.5287	0.269	44.9788	36.8701	54.2459	0.268	0.154759	5.23916	0.269	4.53908	1.74272	7.77999
0.269	57.1099	16.5451	0.27	44.9882	36.9027	54.2411	0.269	0.118633	5.25535	0.27	4.50692	1.73641	7.72941
0.27	57.2309	16.5618	0.271	44.9966	36.942	54.231	0.27	0.087251	5.27272	0.271	4.47471	1.69666	7.66717
0.271	57.3446	16.5787	0.272	45.0042	36.9812	54.2319	0.271	0.0606453	5.29126	0.272	4.44263	1.66622	7.6155
0.272	57.4509	16.5959	0.273	45.0113	37.0193	54.2382	0.272	0.0388415	5.31095	0.273	4.41072	1.6748	7.53502
0.273	57.5521	16.6133	0.274	45.0179	37.0373	54.2208	0.273	0.0218608	5.33177	0.274	4.37902	1.70287	7.49995
0.274	57.6506	16.6308	0.275	45.0245	37.0557	54.1696	0.274	0.00971986	5.3537	0.275	4.34773	1.70021	7.44767
0.275	57.7462	16.648	0.276	45.0309	37.0743	54.1386	0.275	0.00243056	5.37671	0.276	4.31705	1.68605	7.39367
0.276	57.8388	16.664	0.277	45.0368	37.0929	54.1258	0.276	0	5.40079	0.277	4.28685	1.67841	7.35602
0.277	57.9284	16.6795	0.278	45.0425	37.0663	54.1157	0.277	0	5.42592	0.278	4.25696	1.68641	7.30277
0.278	58.0149	16.6952	0.279	45.0479	37.0745	54.1438	0.278	0	5.45206	0.279	4.22743	1.70146	7.25883
0.279	58.0957	16.711	0.28	45.0532	37.0975	54.1295	0.279	0	5.4792	0.28	4.19829	1.71363	7.22421
0.28	58.1684	16.7269	0.281	45.0584	37.119	54.0963	0.28	0	5.5073	0.281	4.16973	1.71283	7.18692
0.281	58.2329	16.7428	0.282	45.0634	37.1029	54.0609	0.281	0	5.53634	0.282	4.14195	1.7047	7.14945
0.282	58.289	16.7589	0.283	45.068	37.1068	54.0231	0.282	0	5.56629	0.283	4.115	1.71992	7.10477
0.283	58.3368	16.775	0.284	45.0724	37.0708	54.0122	0.283	0	5.59712	0.284	4.08905	1.70808	7.07324
0.284	58.3763	16.7911	0.285	45.0765	37.0681	54.0118	0.284	0	5.6288	0.285	4.06432	1.68147	7.06761
0.285	58.4073	16.8073	0.286	45.0803	37.0983	53.995	0.285	0	5.6613	0.286	4.04082	1.64452	7.05476
0.286	58.4298	16.8235	0.287	45.0838	37.1366	53.9794	0.286	0	5.69459	0.287	4.01859	1.60712	7.01741
0.287	58.4439	16.8397	0.288	45.087	37.1758	54.0106	0.287	0	5.72863	0.288	3.99764	1.56171	6.96267
0.288	58.4495	16.8558	0.289	45.0903	37.2165	54.0164	0.288	0	5.7634	0.289	3.97798	1.53629	6.91409
0.289	58.4466	16.8719	0.29	45.0936	37.2137	53.9972	0.289	0	5.79822	0.29	3.95966	1.5232	6.90196
0.29	58.4351	16.888	0.291	45.0967	37.2224	53.9542	0.29	0	5.83243	0.291	3.94267	1.522	6.89904
0.291	58.4152	16.904	0.292	45.0999	37.3026	53.8861	0.291	0	5.866	0.292	3.92703	1.50503	6.89259
0.292	58.3869	16.9199	0.293	45.1031	37.3749	53.8318	0.292	0	5.89889	0.293	3.91294	1.48002	6.87714
0.293	58.3501	16.9356	0.294	45.1063	37.3686	53.7942	0.293	0	5.93108	0.294	3.90059	1.44209	6.85522
0.294	58.3048	16.9513	0.295	45.1093	37.367	53.7556	0.294	0	5.96315	0.295	3.88997	1.42955	6.85023
0.295	58.2513	16.9669	0.296	45.1112	37.386	53.7326	0.295	0	5.99572	0.296	3.88112	1.40746	6.88255
0.296	58.1894	16.9823	0.297	45.1117	37.3803	53.7342	0.296	0	6.02875	0.297	3.87402	1.39883	6.84892
0.297	58.1169	16.9975	0.298	45.1103	37.3721	53.718	0.297	0	6.06221	0.298	3.8687	1.36767	6.83994
0.298	58.0313	17.0126	0.299	45.1067	37.3616	53.7179	0.298	0	6.09607	0.299	3.86515	1.35471	6.88678
0.299	57.9327	17.0274	0.3	45.1011	37.3489	53.6572	0.299	0	6.13029	0.3	3.86338	1.35209	6.88636
0.3	57.8214	17.0421	0.301	45.0934	37.3341	53.5851	0.3	0	6.16484	0.301	3.86357	1.32623	6.92779
0.301	57.6972	17.0565	0.302	45.0836	37.319	53.5228	0.301	0	6.19968	0.302	3.86588	1.31594	6.94657
0.302	57.5605	17.0707	0.303	45.072	37.3244	53.5209	0.302	0	6.23479	0.303	3.87032	1.30766	6.98609
0.303	57.4112	17.0847	0.304	45.0587	37.3036	53.5135	0.303	0	6.27012	0.304	3.87688	1.3014	7.03856
0.304	57.2496	17.099	0.305	45.0437	37.3193	53.4856	0.304	0	6.30565	0.305	3.88538	1.29673	7.13397
0.305	57.0758	17.1143	0.306	45.0273	37.3159	53.3879	0.305	0	6.34134	0.306	3.89564	1.29315	7.19662
0.306	56.89	17.1306	0.307	45.0096	37.2902	53.2652	0.306	0	6.37715	0.307	3.90765	1.29055	7.23459
0.307	56.6924	17.1478	0.308	44.9906	37.2644	53.1256	0.307	0	6.41304	0.308	3.92139	1.28986	7.2406
0.308	56.4855	17.166	0.309	44.9705	37.2513	52.9793	0.308	0	6.44899	0.309	3.93686	1.28296	7.29595
0.309	56.2721	17.1851	0.31	44.9494	37.2741	52.8839	0.309	0	6.48496	0.31	3.95404	1.27731	7.35578
0.31	56.0499	17.2045	0.311	44.9274	37.3139	52.7877	0.31	0	6.52091	0.311	3.97309	1.25747	7.41806
0.311	55.8166	17.2235	0.312	44.9049	37.309	52.7231	0.311	0	6.55681	0.312	3.99433	1.2474	7.48334
0.312	55.5726	17.2421	0.313	44.8818	37.3217	52.684	0.312	0	6.59263	0.313	4.01791	1.23785	7.56892
0.313	55.318	17.2603	0.314	44.8578	37.3417	52.617	0.313	0	6.62832	0.314	4.04383	1.22883	7.67722
0.314	55.0531	17.278	0.315	44.8331	37.3395	52.5558	0.314	0	6.66385	0.315	4.07204	1.21199	7.78798
0.315	54.7782	17.2953	0.316	44.8077	37.3385	52.5174	0.315	0	6.69919	0.316	4.10252	1.18231	7.91609
0.316	54.4935	17.3121	0.317	44.7815	37.3575	52.4565	0.316	0	6.73431	0.317	4.13524	1.15733	8.06438
0.317	54.1993	17.3285	0.318	44.7544	37.3896	52.3475	0.317	0	6.76916	0.318	4.17017	1.14846	8.14366
0.318	53.8959	17.3443	0.319	44.7267	37.4034	52.2685	0.318	0	6.80372	0.319	4.20728	1.13987	8.25185
0.319	53.5836	17.3603	0.32	44.6987	37.4147	52.2253	0.319	0	6.83796	0.32	4.24652	1.12962	8.37721
0.32	53.2627	17.3769	0.321	44.6702	37.4087	52.2262	0.32	0	6.87183	0.321	4.28787	1.12139	8.50877
0.321	52.9334	17.3943	0.322	44.6411	37.4227	52.2073	0.321	0	6.90594	0.322	4.33145	1.12987	8.59406
0.322	52.5963	17.4124	0.323	44.6117	37.453	52.1759	0.322	0	6.94088	0.323	4.3774	1.14019	8.64139
0.323	52.2514	17.4312	0.324	44.5818	37.4499	52.1431	0.323	0	6.97662	0.324	4.42567	1.15191	8.72131
0.324	51.8993	17.4507	0.325	44.5515	37.4741	52.0812	0.324	0	7.01313	0.325	4.47603	1.14609	8.8321
0.325	51.5402	17.4701	0.326	44.5207	37.5089	52.0091	0.325	0	7.05038	0.326	4.52828	1.14105	8.97728
0.326	51.1745	17.4889	0.327	44.4893	37.5085	51.9182	0.326	0	7.08831	0.327	4.58217	1.13109	9.12182
0.327	50.8026	17.5071	0.328	44.4573	37.5321	51.8417	0.327	0	7.12691	0.328	4.63749	1.11784	9.25366
0.328	50.4248	17.5246	0.329	44.4248	37.5605	51.788	0.328	0	7.16612	0.329	4.69418	1.12821	9.39031
0.329	50.0414	17.5414	0.33	44.3917	37.592	51.7328	0.329	0	7.20592	0.33	4.75219	1.11073	9.52361
0.33	49.6529	17.5581	0.331	44.3585	37.6571	51.6766	0.33	0	7.24626	0.331	4.81146	1.09648	9.65664
0.331	49.2596	17.5753	0.332	44.3253	37.6692	51.6056	0.331	0	7.2871	0.332	4.87193	1.077	9.78926
0.332	48.8644	17.5931	0.333	44.2924	37.7241	51.4911	0.332	0	7.3284	0.333	4.93354	1.07754	9.97485
0.333	48.4701	17.6114	0.334	44.26	37.8101	51.3663	0.333	0	7.37013	0.334	4.99623	1.07455	10.1631
0.334	48.077	17.6302	0.335	44.2279	37.8462	51.2318	0.334	0	7.41224	0.335	5.05994	1.06951	10.3262
0.335	47.6855	17.6494	0.336	44.1961	37.8296	51.1642	0.335	0	7.45469	0.336	5.12497	1.06699	10.4969
0.336	47.2961	17.6691	0.337	44.1648	37.8106	51.0569	0.336	0	7.49744	0.337	5.19158	1.07331	10.6764
0.337	46.909	17.6892	0.338	44.1339	37.8031	50.975	0.337	0	7.54044	0.338	5.25971	1.063	10.8568
0.338	46.5248	17.7097	0.339	44.1038	37.8268	50.8889	0.338	0	7.58367	0.339	5.3293	1.04524	11.0378
0.339	46.1437	17.7306	0.34	44.0748	37.8351	50.8407	0.339	0	7.62706	0.34	5.40011	1.07953	11.1938
0.34	45.7661	17.7519	0.341	44.0473	37.8348	50.8263	0.34	0	7.67059	0.341	5.4719	1.11878	11.348
0.341	45.3924	17.7736	0.342	44.0213	37.8165	50.8062	0.341	0	7.71421	0.342	5.54458	1.15936	11.502
0.342	45.0254	17.7955	0.343	43.9973	37.8278	50.7254	0.342	0	7.75787	0.343	5.61828	1.16896	11.6883
0.343	44.6678	17.8172	0.344	43.9754	37.7987	50.6527	0.343	0	7.80154	0.344	5.69308	1.16634	11.8395
0.344	44.3201	17.8378	0.345	43.9555	37.799	50.6305	0.344	0	7.84516	0.345	5.76891	1.16766	11.9827
0.345	43.9826	17.8581	0.346	43.9375	37.7373	50.5625	0.345	0	7.88871	0.346	5.84605	1.16497	12.115
0.346	43.6532	17.8787	0.347	43.9206	37.6653	50.5463	0.346	0	7.93213	0.347	5.92478	1.14022	12.2713
0.347	43.3296	17.8994	0.348	43.9044	37.5995	50.5463	0.347	0	7.97538	0.348	6.005	1.1547	12.4364
0.348	43.0124	17.9204	0.349	43.8892	37.6006	50.5852	0.348	0	8.01842	0.349	6.08665	1.19382	12.6413
0.349	42.7018	17.9415	0.35	43.8751	37.603	50.5869	0.349	0	8.06121	0.35	6.16964	1.21497	12.7993
0.35	42.398	17.9629	0.351	43.8618	37.6236	50.5526	0.35	0	8.10371	0.351	6.2539	1.22269	12.9353
0.351	42.1014	17.9843	0.352	43.8496	37.5853	50.5761	0.351	0	8.14587	0.352	6.33934	1.25774	13.1012
0.352	41.8123	18.0059	0.353	43.8387	37.5523	50.5757	0.352	0	8.18766	0.353	6.42588	1.27543	13.2624
0.353	41.531	18.0276	0.354	43.8288	37.6114	50.5306	0.353	0	8.22903	0.354	6.51377	1.2905	13.4329
0.354	41.2577	18.0494	0.355	43.8199	37.6393	50.4848	0.354	0	8.26995	0.355	6.60312	1.30813	13.6158
0.355	40.9927	18.0712	0.356	43.8119	37.6503	50.4221	0.355	0	8.31037	0.356	6.69365	1.3283	13.8071
0.356	40.7362	18.093	0.357	43.8049	37.6141	50.3712	0.356	0	8.35025	0.357	6.78528	1.35099	13.9979
0.357	40.4886	18.1156	0.358	43.799	37.5803	50.3321	0.357	0	8.38955	0.358	6.87792	1.37618	14.1437
0.358	40.2476	18.1387	0.359	43.7942	37.545	50.3258	0.358	0	8.42824	0.359	6.97165	1.39969	14.2754
0.359	40.011	18.1618	0.36	43.7901	37.5073	50.3451	0.359	0	8.46628	0.36	7.06655	1.40811	14.4152
0.36	39.779	18.1848	0.361	43.7868	37.5124	50.3596	0.36	0	8.50363	0.361	7.16254	1.40922	14.5729
0.361	39.552	18.2078	0.362	43.7841	37.5544	50.3754	0.361	0	8.54026	0.362	7.25952	1.42334	14.7286
0.362	39.33	18.2307	0.363	43.7822	37.5885	50.3857	0.362	0	8.57612	0.363	7.35738	1.44663	14.8823
0.363	39.1134	18.2535	0.364	43.7805	37.5936	50.3503	0.363	0	8.61119	0.364	7.45605	1.482	15.0337
0.364	38.9023	18.2761	0.365	43.7797	37.6144	50.289	0.364	0	8.64606	0.365	7.55541	1.51666	15.1828
0.365	38.6969	18.2986	0.366	43.7807	37.5457	50.3461	0.365	0	8.68132	0.366	7.65538	1.55297	15.3111
0.366	38.4975	18.3209	0.367	43.7831	37.5134	50.3814	0.366	0	8.71696	0.367	7.75586	1.59088	15.423
0.367	38.3042	18.3429	0.368	43.7869	37.5066	50.407	0.367	0	8.75292	0.368	7.85674	1.63036	15.5372
0.368	38.1172	18.3648	0.369	43.7919	37.4391	50.4398	0.368	0	8.78918	0.369	7.95794	1.67138	15.6697
0.369	37.9368	18.3864	0.37	43.7981	37.3978	50.4804	0.369	0	8.8257	0.37	8.05934	1.71388	15.7854
0.37	37.763	18.4077	0.371	43.8051	37.3594	50.4912	0.37	0	8.86244	0.371	8.16086	1.75784	15.8905
0.371	37.5985	18.4287	0.372	43.8128	37.3503	50.4891	0.371	0	8.89937	0.372	8.26221	1.80294	15.9852
0.372	37.4459	18.4494	0.373	43.8217	37.3425	50.5143	0.372	0	8.93645	0.373	8.36313	1.84889	16.0749
0.373	37.3053	18.4705	0.374	43.8315	37.2845	50.5887	0.373	0	8.97364	0.374	8.46352	1.89563	16.1595
0.374	37.1768	18.4924	0.375	43.8414	37.2783	50.6629	0.374	0	9.01092	0.375	8.56327	1.94313	16.2389
0.375	37.0607	18.5146	0.376	43.8508	37.2721	50.7246	0.375	0	9.04824	0.376	8.6623	1.97335	16.3378
0.376	36.9569	18.5364	0.377	43.8598	37.3165	50.7521	0.376	0	9.08556	0.377	8.76051	2.00985	16.4658
0.377	36.8657	18.5578	0.378	43.8686	37.379	50.7999	0.377	0	9.12286	0.378	8.85779	2.0564	16.6051
0.378	36.787	18.5787	0.379	43.877	37.3779	50.8465	0.378	0	9.16009	0.379	8.95423	2.09207	16.7429
0.379	36.721	18.5992	0.38	43.8853	37.3613	50.9097	0.379	0	9.19721	0.38	9.04991	2.12321	16.8795
0.38	36.6678	18.6192	0.381	43.8935	37.3082	50.9353	0.38	0	9.2342	0.381	9.14473	2.16521	17.0055
0.381	36.6273	18.6387	0.382	43.9019	37.2704	50.9323	0.381	0	9.27101	0.382	9.2386	2.21846	17.1501
0.382	36.5997	18.6577	0.383	43.9107	37.205	50.9078	0.382	0	9.30824	0.383	9.33143	2.2702	17.2814
0.383	36.5849	18.6761	0.384	43.92	37.201	50.888	0.383	0	9.34649	0.384	9.42313	2.30655	17.4111
0.384	36.5829	18.694	0.385	43.9295	37.1858	50.831	0.384	0	9.38571	0.385	9.51361	2.35016	17.5112
0.385	36.5939	18.7113	0.386	43.9393	37.1091	50.8143	0.385	0	9.42588	0.386	9.60278	2.39222	17.7382
0.386	36.6152	18.7287	0.387	43.9489	37.0343	50.9089	0.386	0	9.46695	0.387	9.69055	2.45065	17.9495
0.387	36.6445	18.7467	0.388	43.958	36.9754	51.0075	0.387	0	9.50888	0.388	9.77684	2.51051	18.1371
0.388	36.6818	18.7654	0.389	43.966	36.9587	51.1014	0.388	0	9.55162	0.389	9.86174	2.55893	18.292
0.389	36.727	18.7841	0.39	43.9726	36.9433	51.1312	0.389	0	9.59515	0.39	9.94534	2.6117	18.4448
0.39	36.7825	18.8021	0.391	43.978	37.0036	51.1125	0.39	0	9.63942	0.391	10.0275	2.66488	18.5327
0.391	36.8506	18.8194	0.392	43.9824	37.0727	51.0732	0.391	0	9.68437	0.392	10.1083	2.70163	18.6289
0.392	36.9314	18.836	0.393	43.9861	37.1198	51.0934	0.392	0	9.72998	0.393	10.1875	2.72274	18.7935
0.393	37.0247	18.8519	0.394	43.9889	37.0883	51.1185	0.393	0	9.77619	0.394	10.2651	2.74361	18.8967
0.394	37.1279	18.8671	0.395	43.9908	37.0392	51.144	0.394	0	9.82295	0.395	10.3411	2.78663	18.9545
0.395	37.2387	18.8816	0.396	43.9913	37.0134	51.1374	0.395	0	9.87023	0.396	10.4158	2.83242	19.0838
0.396	37.3568	18.8953	0.397	43.9901	36.9967	51.1156	0.396	0	9.91798	0.397	10.4889	2.84698	19.1107
0.397	37.4822	18.9082	0.398	43.9864	36.9558	51.0896	0.397	0	9.96615	0.398	10.5605	2.8507	19.2088
0.398	37.6147	18.9204	0.399	43.9804	36.9339	51.0596	0.398	0	10.0141	0.399	10.6304	2.8838	19.3139
0.399	37.7542	18.9317	0.4	43.9719	36.9	51.0255	0.399	0	10.061	0.4	10.6988	2.89079	19.3639
0.4	37.9005	18.9423	0.401	43.9609	36.8733	50.9875	0.4	0	10.107	0.401	10.7658	2.88782	19.4508
0.401	38.0536	18.952	0.402	43.9477	36.8719	51.0182	0.401	0	10.152	0.402	10.8316	2.89124	19.5996
0.402	38.2133	18.961	0.403	43.9328	36.8938	51.0473	0.402	0	10.1959	0.403	10.8966	2.93273	19.745
0.403	38.3793	18.9697	0.404	43.916	36.8713	51.0639	0.403	0	10.2386	0.404	10.9606	3.01203	19.8869
0.404	38.5516	18.9788	0.405	43.8972	36.808	51.1023	0.404	0	10.2803	0.405	11.0237	3.07594	20.0252
0.405	38.73	18.9877	0.406	43.876	36.7429	51.1358	0.405	0	10.3213	0.406	11.0859	3.15072	20.1799
0.406	38.9143	18.9958	0.407	43.8527	36.6928	51.127	0.406	0	10.3624	0.407	11.1473	3.22719	20.3116
0.407	39.1019	19.003	0.408	43.8271	36.6094	51.1292	0.407	0	10.4035	0.408	11.2082	3.26468	20.4191
0.408	39.2902	19.0093	0.409	43.7993	36.5711	51.1307	0.408	0	10.4445	0.409	11.269	3.29565	20.5556
0.409	39.4814	19.0148	0.41	43.7693	36.5068	51.1723	0.409	0	10.4854	0.41	11.3297	3.34675	20.6887
0.41	39.6778	19.0194	0.411	43.7368	36.4353	51.1224	0.41	0	10.5262	0.411	11.3904	3.39188	20.8183
0.411	39.8791	19.023	0.412	43.7016	36.3172	51.0073	0.411	0	10.5668	0.412	11.4511	3.39436	20.8222
0.412	40.0828	19.0258	0.413	43.6634	36.2497	50.9221	0.412	0	10.6072	0.413	11.5117	3.39607	20.8266
0.413	40.2863	19.0277	0.414	43.6221	36.2538	50.8952	0.413	0	10.6473	0.414	11.5722	3.39289	20.8826
0.414	40.4892	19.0287	0.415	43.5778	36.2482	50.9045	0.414	0	10.6872	0.415	11.6325	3.43918	20.9374
0.415	40.6915	19.0288	0.416	43.5305	36.2129	50.824	0.415	0	10.7267	0.416	11.6926	3.45417	21.0264
0.416	40.893	19.0286	0.417	43.4802	36.1659	50.7557	0.416	0	10.7658	0.417	11.7523	3.50588	21.1323
0.417	41.0933	19.0288	0.418	43.4267	36.0858	50.7264	0.417	0	10.8046	0.418	11.8117	3.51132	21.2663
0.418	41.2924	19.0294	0.419	43.3698	36.0049	50.6603	0.418	0	10.8429	0.419	11.8706	3.47559	21.4617
0.419	41.49	19.0297	0.42	43.31	35.8868	50.5885	0.419	0	10.8807	0.42	11.929	3.48692	21.6642
0.42	41.686	19.029	0.421	43.2472	35.7957	50.6058	0.42	0	10.918	0.421	11.9869	3.51295	21.781
0.421	41.8802	19.0275	0.422	43.1813	35.7418	50.5459	0.421	0	10.9553	0.422	12.0442	3.53919	21.9391
0.422	42.0723	19.0251	0.423	43.1117	35.6484	50.4389	0.422	0	10.9934	0.423	12.1009	3.56391	22.1751
0.423	42.2622	19.0218	0.424	43.0381	35.5438	50.2895	0.423	0	11.032	0.424	12.1568	3.581	22.4104
0.424	42.4497	19.0176	0.425	42.9608	35.5243	50.1502	0.424	0	11.0713	0.425	12.2119	3.61968	22.5403
0.425	42.6346	19.0126	0.426	42.8794	35.5069	50.0669	0.425	0	11.1111	0.426	12.2663	3.66978	22.7312
0.426	42.8167	19.0066	0.427	42.794	35.3964	50.0418	0.426	0	11.1515	0.427	12.3197	3.66844	22.8583
0.427	42.9959	18.9998	0.428	42.7047	35.2008	50.0054	0.427	0	11.1923	0.428	12.3723	3.66785	22.9832
0.428	43.1744	18.9921	0.429	42.6114	35.0962	49.929	0.428	0	11.2336	0.429	12.4238	3.66854	23.1058
0.429	43.3544	18.9835	0.43	42.5146	35.0154	49.8473	0.429	0	11.2752	0.43	12.4745	3.70343	23.2317
0.43	43.5359	18.9741	0.431	42.4144	34.902	49.7255	0.43	0	11.3172	0.431	12.5245	3.71522	23.3632
0.431	43.7185	18.9638	0.432	42.3115	34.7821	49.5193	0.431	0	11.3596	0.432	12.5737	3.68718	23.5286
0.432	43.9022	18.9533	0.433	42.2064	34.7302	49.4109	0.432	0	11.4016	0.433	12.6221	3.63846	23.7105
0.433	44.0868	18.9433	0.434	42.0992	34.578	49.32	0.433	0	11.4425	0.434	12.6696	3.62569	23.868
0.434	44.272	18.9337	0.435	41.99	34.4433	49.1333	0.434	0	11.4824	0.435	12.7161	3.63528	23.9617
0.435	44.4577	18.9246	0.436	41.8791	34.2999	49.0962	0.435	0	11.5212	0.436	12.7617	3.64617	24.0557
0.436	44.6437	18.9153	0.437	41.7668	34.2391	48.9566	0.436	0	11.5588	0.437	12.8065	3.65837	24.1152
0.437	44.8299	18.9052	0.438	41.6532	34.154	48.8364	0.437	0	11.5952	0.438	12.8506	3.67185	24.2247
0.438	45.016	18.8944	0.439	41.5381	34.1086	48.7016	0.438	0	11.6305	0.439	12.8939	3.67882	24.3689
0.439	45.1994	18.8828	0.44	41.4215	34.0107	48.5777	0.439	0	11.6644	0.44	12.9364	3.67446	24.5103
0.44	45.3776	18.8704	0.441	41.303	33.9418	48.482	0.44	0	11.6971	0.441	12.9781	3.68259	24.6197
0.441	45.5527	18.8573	0.442	41.1824	33.8721	48.4451	0.441	0	11.7285	0.442	13.0189	3.7139	24.75
0.442	45.7271	18.8434	0.443	41.0602	33.8092	48.426	0.442	0	11.7591	0.443	13.0588	3.72768	24.8819
0.443	45.9006	18.8288	0.444	40.9364	33.7096	48.4549	0.443	0	11.7897	0.444	13.0977	3.75315	25.0451
0.444	46.0729	18.8136	0.445	40.8111	33.6102	48.3971	0.444	0	11.8201	0.445	13.1357	3.7438	25.1704
0.445	46.244	18.7976	0.446	40.6845	33.4741	48.3304	0.445	0	11.8503	0.446	13.1726	3.73863	25.2984
0.446	46.4137	18.7816	0.447	40.5567	33.3381	48.2252	0.446	0	11.8803	0.447	13.2083	3.74254	25.4532
0.447	46.5817	18.7662	0.448	40.428	33.1415	48.1443	0.447	0	11.9101	0.448	13.2425	3.74696	25.5465
0.448	46.748	18.7515	0.449	40.2983	32.9782	48.0204	0.448	0	11.9396	0.449	13.2752	3.7301	25.7492
0.449	46.9124	18.7367	0.45	40.1676	32.8201	47.8791	0.449	0	11.9688	0.45	13.3065	3.70767	25.9238
0.45	47.0747	18.7213	0.451	40.0364	32.6424	47.7749	0.45	0	11.9977	0.451	13.3363	3.6955	26.0071
0.451	47.2347	18.7053	0.452	39.9047	32.4649	47.6175	0.451	0	12.0263	0.452	13.365	3.71634	26.0628
0.452	47.3923	18.6888	0.453	39.7725	32.2878	47.4451	0.452	0	12.0545	0.453	13.3922	3.71675	26.1407
0.453	47.5474	18.6717	0.454	39.6398	32.049	47.3424	0.453	0	12.0823	0.454	13.4178	3.72075	26.2447
0.454	47.6998	18.654	0.455	39.507	31.8297	47.2561	0.454	0	12.1096	0.455	13.4419	3.73133	26.3736
0.455	47.8493	18.6358	0.456	39.3745	31.6132	47.1433	0.455	0	12.1365	0.456	13.4647	3.73401	26.4925
0.456	47.9958	18.6171	0.457	39.2428	31.4029	47.0189	0.456	0	12.1629	0.457	13.4861	3.70973	26.6039
0.457	48.1391	18.5978	0.458	39.1125	31.2548	46.8748	0.457	0	12.1888	0.458	13.5064	3.68669	26.7112
0.458	48.2792	18.5782	0.459	38.9841	31.1105	46.731	0.458	0	12.2148	0.459	13.5255	3.66526	26.8142
0.459	48.4158	18.558	0.46	38.8579	30.9702	46.6305	0.459	0	12.2415	0.46	13.5437	3.64781	26.9716
0.46	48.5489	18.5374	0.461	38.734	30.7947	46.5389	0.46	0	12.2689	0.461	13.5607	3.64588	27.1309
0.461	48.6784	18.5164	0.462	38.6124	30.6141	46.4497	0.461	0	12.2969	0.462	13.577	3.64857	27.2702
0.462	48.8039	18.4956	0.463	38.4931	30.4652	46.363	0.462	0	12.3256	0.463	13.5931	3.63433	27.3551
0.463	48.9256	18.4757	0.464	38.3761	30.3618	46.2759	0.463	0	12.3549	0.464	13.609	3.63454	27.4162
0.464	49.0432	18.4568	0.465	38.2613	30.2616	46.1717	0.464	0	12.3847	0.465	13.6249	3.63745	27.461
0.465	49.1566	18.4381	0.466	38.1486	30.1646	46.0683	0.465	0	12.415	0.466	13.641	3.64349	27.5032
0.466	49.2658	18.4191	0.467	38.0384	30.0647	45.9658	0.466	0	12.4459	0.467	13.658	3.65511	27.5433
0.467	49.3706	18.3998	0.468	37.931	29.9405	45.8646	0.467	0	12.4772	0.468	13.6764	3.68156	27.6017
0.468	49.4708	18.3802	0.469	37.8268	29.825	45.7957	0.468	0	12.5084	0.469	13.6964	3.71308	27.6755
0.469	49.5665	18.3603	0.47	37.7264	29.6929	45.7363	0.469	0	12.5387	0.47	13.7179	3.74966	27.7477
0.47	49.6576	18.3402	0.471	37.6302	29.5589	45.6935	0.47	0	12.5682	0.471	13.741	3.79849	27.8181
0.471	49.7438	18.3199	0.472	37.5379	29.4311	45.6994	0.471	0	12.5967	0.472	13.7655	3.85494	27.887
0.472	49.8252	18.2993	0.473	37.4495	29.3094	45.6987	0.472	0	12.6243	0.473	13.7916	3.91456	27.955
0.473	49.9016	18.2786	0.474	37.3646	29.163	45.6882	0.473	0	12.6509	0.474	13.819	3.9773	28.0218
0.474	49.9707	18.2577	0.475	37.2829	29.0156	45.6743	0.474	0	12.6766	0.475	13.848	4.0313	28.0875
0.475	50.0297	18.2367	0.476	37.2042	28.8731	45.57	0.475	0	12.7012	0.476	13.8781	4.07722	28.1515
0.476	50.0788	18.2155	0.477	37.1283	28.7356	45.4667	0.476	0	12.7248	0.477	13.9093	4.12523	28.2134
0.477	50.1179	18.1949	0.478	37.0553	28.6031	45.369	0.477	0	12.7474	0.478	13.9415	4.18846	28.273
0.478	50.1468	18.1748	0.479	36.9849	28.4756	45.331	0.478	0	12.7688	0.479	13.9746	4.25988	28.3304
0.479	50.1657	18.1547	0.48	36.9175	28.3535	45.247	0.479	0	12.7898	0.48	14.0086	4.33407	28.4512
0.48	50.1744	18.1345	0.481	36.8529	28.2661	45.1731	0.48	0	12.811	0.481	14.0438	4.41097	28.5416
0.481	50.173	18.1143	0.482	36.7906	28.1896	45.0849	0.481	0	12.8322	0.482	14.0799	4.49025	28.6203
0.482	50.1615	18.0941	0.483	36.7306	28.1171	45.0263	0.482	0	12.8536	0.483	14.1171	4.57183	28.6975
0.483	50.1398	18.0739	0.484	36.6733	28.049	44.9786	0.483	0	12.875	0.484	14.1554	4.65588	28.7736
0.484	50.108	18.0537	0.485	36.6188	27.9872	44.9973	0.484	0	12.8965	0.485	14.1946	4.74233	28.8483
0.485	50.0662	18.0336	0.486	36.5669	27.9564	45.0003	0.485	0	12.9181	0.486	14.2345	4.82505	28.9211
0.486	50.0143	18.0136	0.487	36.5177	27.9301	44.9668	0.486	0	12.9396	0.487	14.2751	4.89428	28.9921
0.487	49.9525	17.9936	0.488	36.4713	27.8974	44.9348	0.487	0	12.9612	0.488	14.3166	4.94952	29.0613
0.488	49.8807	17.9738	0.489	36.4277	27.8484	44.8728	0.488	0	12.9827	0.489	14.3589	5.02707	29.1289
0.489	49.7991	17.9541	0.49	36.3863	27.8086	44.7981	0.489	0	13.0042	0.49	14.4022	5.09754	29.1947
0.49	49.7077	17.9346	0.491	36.3468	27.7656	44.7307	0.49	0	13.0256	0.491	14.4463	5.17367	29.2588
0.491	49.6066	17.9152	0.492	36.3093	27.7493	44.6631	0.491	0	13.0469	0.492	14.4918	5.27476	29.3213
0.492	49.496	17.896	0.493	36.2739	27.7479	44.5646	0.492	0.00243056	13.0682	0.493	14.5392	5.3456	29.3832
0.493	49.3759	17.877	0.494	36.2407	27.7515	44.4793	0.493	0.00971986	13.0892	0.494	14.5886	5.3904	29.445
0.494	49.2464	17.8583	0.495	36.2099	27.7603	44.3934	0.494	0.0218608	13.1108	0.495	14.6399	5.44263	29.4909
0.495	49.1077	17.8398	0.496	36.1816	27.7742	44.3302	0.495	0.0388415	13.1328	0.496	14.6931	5.5175	29.5086
0.496	48.9599	17.8215	0.497	36.156	27.736	44.264	0.496	0.0606453	13.1547	0.497	14.7486	5.61139	29.5377
0.497	48.8031	17.8036	0.498	36.1332	27.6597	44.1547	0.497	0.087251	13.1763	0.498	14.8063	5.68568	29.5987
0.498	48.6376	17.7859	0.499	36.1137	27.6455	44.0997	0.498	0.118633	13.1977	0.499	14.8663	5.81334	29.6614
0.499	48.4634	17.7686	0.5	36.0976	27.6879	44.0486	0.499	0.154759	13.2188	0.5	14.9289	5.96298	29.7257
0.5	48.2808	17.7515	0.501	36.0847	27.7367	43.9704	0.5	0.195596	13.2397	0.501	14.9938	6.01091	29.7847
0.501	48.0923	17.7349	0.502	36.0755	27.7526	43.9346	0.501	0.241103	13.2602	0.502	15.0612	6.06025	29.8109
0.502	47.9006	17.7186	0.503	36.0707	27.7405	43.8753	0.502	0.291235	13.2805	0.503	15.1308	6.16011	29.8369
0.503	47.7058	17.7027	0.504	36.0703	27.6493	43.7824	0.503	0.345944	13.3004	0.504	15.2028	6.25823	29.8636
0.504	47.5081	17.6872	0.505	36.0745	27.5736	43.6905	0.504	0.405176	13.3199	0.505	15.2774	6.36708	29.9055
0.505	47.3078	17.6714	0.506	36.0833	27.5991	43.6725	0.505	0.468873	13.3391	0.506	15.3544	6.46677	29.9483
0.506	47.1074	17.6548	0.507	36.0968	27.6529	43.6143	0.506	0.536973	13.3578	0.507	15.4339	6.51749	29.9927
0.507	46.9097	17.6375	0.508	36.1154	27.7142	43.6271	0.507	0.609409	13.3762	0.508	15.516	6.56275	30.019
0.508	46.7147	17.6199	0.509	36.1391	27.7927	43.6415	0.508	0.686112	13.3941	0.509	15.6009	6.63955	30.033
0.509	46.5202	17.6028	0.51	36.1677	27.9037	43.6245	0.509	0.767005	13.4116	0.51	15.6885	6.73814	30.0614
0.51	46.324	17.5862	0.511	36.2013	27.9856	43.6648	0.51	0.852009	13.4286	0.511	15.7791	6.81928	30.091
0.511	46.1263	17.5701	0.512	36.2396	28.038	43.7277	0.511	0.941043	13.4452	0.512	15.8725	6.95465	30.1219
0.512	45.9273	17.5546	0.513	36.2823	28.0312	43.808	0.512	1.03402	13.4612	0.513	15.9686	7.08293	30.1545
0.513	45.7272	17.5396	0.514	36.3291	28.0347	43.8498	0.513	1.13084	13.4767	0.514	16.0675	7.17675	30.1892
0.514	45.5262	17.5251	0.515	36.3802	28.0531	43.8763	0.514	1.23143	13.4917	0.515	16.1691	7.24983	30.2261
0.515	45.3244	17.5113	0.516	36.4358	28.0693	43.8775	0.515	1.33566	13.5068	0.516	16.2733	7.27824	30.265
0.516	45.1221	17.498	0.517	36.4959	28.1181	43.915	0.516	1.44346	13.5226	0.517	16.3804	7.39366	30.3599
0.517	44.9194	17.4853	0.518	36.5605	28.2231	43.9472	0.517	1.55471	13.5391	0.518	16.4905	7.54657	30.497
0.518	44.7166	17.4732	0.519	36.6296	28.3422	43.9431	0.518	1.6693	13.5562	0.519	16.6037	7.66059	30.6509
0.519	44.5138	17.4617	0.52	36.7029	28.4658	43.9496	0.519	1.78711	13.574	0.52	16.7198	7.79401	30.7579
0.52	44.3114	17.4502	0.521	36.7799	28.5644	43.9521	0.52	1.90805	13.5925	0.521	16.8391	7.93519	30.8756
0.521	44.1093	17.4381	0.522	36.8607	28.694	43.9533	0.521	2.03198	13.6115	0.522	16.9614	7.97757	31.0428
0.522	43.9079	17.4255	0.523	36.9454	28.8539	43.9376	0.522	2.15879	13.6306	0.523	17.0866	8.01529	31.2402
0.523	43.7074	17.4122	0.524	37.0338	28.9496	43.9882	0.523	2.28834	13.6489	0.524	17.2145	8.11095	31.4634
0.524	43.5079	17.3983	0.525	37.1254	29.0473	44.1243	0.524	2.42053	13.6666	0.525	17.345	8.22545	31.6707
0.525	43.3097	17.3839	0.526	37.22	29.1498	44.2378	0.525	2.55521	13.6836	0.526	17.478	8.29516	31.8207
0.526	43.1128	17.3695	0.527	37.3174	29.2567	44.3232	0.526	2.69225	13.6998	0.527	17.6134	8.40441	31.9733
0.527	42.9177	17.3558	0.528	37.4176	29.3566	44.3224	0.527	2.83152	13.7152	0.528	17.7511	8.48576	32.1283
0.528	42.7243	17.3429	0.529	37.5204	29.5034	44.475	0.528	2.97289	13.73	0.529	17.8911	8.56672	32.2859
0.529	42.5329	17.3308	0.53	37.6255	29.6955	44.5172	0.529	3.11622	13.7439	0.53	18.0339	8.64858	32.4288
0.53	42.3462	17.3194	0.531	37.7332	29.865	44.5395	0.53	3.26136	13.757	0.531	18.1793	8.75855	32.5884
0.531	42.1666	17.3081	0.532	37.8435	29.9882	44.5399	0.531	3.40817	13.7694	0.532	18.3274	8.8287	32.6924
0.532	41.9945	17.2964	0.533	37.9563	30.1175	44.6111	0.532	3.55652	13.7815	0.533	18.4782	8.9471	32.8612
0.533	41.8276	17.2842	0.534	38.0713	30.2994	44.7193	0.533	3.70625	13.7941	0.534	18.6313	9.048	33.0287
0.534	41.6635	17.2715	0.535	38.1884	30.4119	44.7846	0.534	3.85723	13.8071	0.535	18.7868	9.14944	33.2092
0.535	41.5025	17.2584	0.536	38.3075	30.5129	44.9118	0.535	4.00929	13.8206	0.536	18.9443	9.18501	33.442
0.536	41.3446	17.2449	0.537	38.4281	30.6541	45.0239	0.536	4.1623	13.8344	0.537	19.1037	9.20084	33.7287
0.537	41.1902	17.2309	0.538	38.5501	30.8299	45.1803	0.537	4.3161	13.8486	0.538	19.2646	9.23831	33.9602
0.538	41.0392	17.2166	0.539	38.6733	30.9663	45.2919	0.538	4.47055	13.8632	0.539	19.4267	9.24347	34.1814
0.539	40.8919	17.2018	0.54	38.7975	31.054	45.4334	0.539	4.62549	13.8782	0.54	19.5902	9.25662	34.416
0.54	40.7483	17.1867	0.541	38.9221	31.2264	45.603	0.54	4.78077	13.8934	0.541	19.7551	9.29791	34.6729
0.541	40.6087	17.1718	0.542	39.047	31.3952	45.7099	0.541	4.93624	13.9084	0.542	19.9211	9.34857	34.8945
0.542	40.4732	17.1579	0.543	39.1722	31.5757	45.7288	0.542	5.09175	13.9225	0.543	20.0881	9.42298	35.0503
0.543	40.3395	17.1448	0.544	39.2971	31.8012	45.8358	0.543	5.24715	13.9355	0.544	20.2558	9.53862	35.2684
0.544	40.2076	17.1328	0.545	39.4214	31.958	45.9535	0.544	5.40228	13.9476	0.545	20.4239	9.65799	35.4516
0.545	40.0802	17.1216	0.546	39.5451	32.1236	46.0536	0.545	5.55699	13.9587	0.546	20.5922	9.73453	35.622
0.546	39.9574	17.1109	0.547	39.6682	32.2339	46.2455	0.546	5.71114	13.9688	0.547	20.7603	9.81267	35.768
0.547	39.8393	17.0998	0.548	39.7907	32.4018	46.34	0.547	5.86456	13.9779	0.548	20.9281	9.88587	36.0111
0.548	39.7261	17.0884	0.549	39.9125	32.6038	46.4424	0.548	6.01712	13.986	0.549	21.0959	9.92724	36.2813
0.549	39.6178	17.0768	0.55	40.0333	32.7643	46.5603	0.549	6.16865	13.993	0.55	21.2639	9.94303	36.5048
0.55	39.5145	17.0649	0.551	40.1529	32.8884	46.5907	0.55	6.31902	13.999	0.551	21.432	10.0112	36.7273
0.551	39.4163	17.0528	0.552	40.2709	33.0259	46.719	0.551	6.46808	14.004	0.552	21.6	10.0803	36.9483
0.552	39.3234	17.0405	0.553	40.3869	33.1069	46.8585	0.552	6.61568	14.0079	0.553	21.7677	10.1504	37.1679
0.553	39.2358	17.0279	0.554	40.5006	33.2287	47.0398	0.553	6.76168	14.0108	0.554	21.935	10.2212	37.3857
0.554	39.1537	17.0151	0.555	40.6119	33.3578	47.1597	0.554	6.90593	14.0133	0.555	22.1014	10.2928	37.621
0.555	39.077	17.0022	0.556	40.7208	33.4854	47.2627	0.555	7.04829	14.016	0.556	22.2662	10.3649	37.7915
0.556	39.0059	16.989	0.557	40.8276	33.6117	47.4098	0.556	7.18863	14.0188	0.557	22.4295	10.4351	37.9601
0.557	38.9404	16.9757	0.558	40.9327	33.7812	47.5234	0.557	7.32681	14.0219	0.558	22.591	10.4807	38.2032
0.558	38.8807	16.9616	0.559	41.0363	33.9164	47.6867	0.558	7.46269	14.0252	0.559	22.7507	10.5333	38.4126
0.559	38.8266	16.9461	0.56	41.1384	33.9219	47.8844	0.559	7.59613	14.0287	0.56	22.9085	10.6023	38.6199
0.56	38.7785	16.9298	0.561	41.2388	34.013	48.0624	0.56	7.72702	14.0324	0.561	23.0644	10.6716	38.8129
0.561	38.7361	16.9134	0.562	41.3375	34.1417	48.1935	0.561	7.85522	14.0363	0.562	23.2187	10.7414	39.0032
0.562	38.7021	16.8969	0.563	41.4344	34.2318	48.3015	0.562	7.9806	14.0403	0.563	23.371	10.8321	39.1907
0.563	38.6789	16.8803	0.564	41.5293	34.2905	48.4369	0.563	8.10305	14.0446	0.564	23.5214	10.9129	39.3752
0.564	38.6665	16.8637	0.565	41.6221	34.3406	48.5986	0.564	8.22244	14.049	0.565	23.6697	10.9917	39.548
0.565	38.665	16.8471	0.566	41.7125	34.38	48.807	0.565	8.33866	14.053	0.566	23.8162	11.1026	39.7117
0.566	38.6743	16.8304	0.567	41.7998	34.4182	48.9385	0.566	8.45159	14.0558	0.567	23.9605	11.2151	39.8714
0.567	38.6944	16.8136	0.568	41.8837	34.5161	49.102	0.567	8.56112	14.0576	0.568	24.1026	11.2927	39.9619
0.568	38.7253	16.7969	0.569	41.9643	34.5497	49.2319	0.568	8.66715	14.0583	0.569	24.2424	11.3473	40.0973
0.569	38.7669	16.7802	0.57	42.0413	34.6597	49.3718	0.569	8.76958	14.0579	0.57	24.3796	11.3923	40.2663
0.57	38.8194	16.7636	0.571	42.1148	34.7236	49.4133	0.57	8.86829	14.0564	0.571	24.5142	11.4359	40.4936
0.571	38.8849	16.747	0.572	42.1847	34.8237	49.4633	0.571	8.96321	14.0538	0.572	24.646	11.478	40.6549
0.572	38.9634	16.7304	0.573	42.2512	34.9213	49.5332	0.572	9.05422	14.0501	0.573	24.775	11.5502	40.7616
0.573	39.0526	16.714	0.574	42.3137	35.0159	49.7008	0.573	9.14125	14.046	0.574	24.9009	11.606	40.9663
0.574	39.1521	16.6976	0.575	42.3719	35.1324	49.8903	0.574	9.22421	14.042	0.575	25.0236	11.6694	41.1163
0.575	39.262	16.6814	0.576	42.426	35.2027	50.0542	0.575	9.30302	14.0382	0.576	25.1431	11.7423	41.3501
0.576	39.3822	16.6653	0.577	42.4757	35.2926	50.1805	0.576	9.3776	14.0346	0.577	25.2592	11.8149	41.4904
0.577	39.5125	16.6493	0.578	42.5209	35.3213	50.3834	0.577	9.44787	14.0312	0.578	25.3716	11.8866	41.6313
0.578	39.6528	16.6335	0.579	42.5617	35.3535	50.5708	0.578	9.51378	14.028	0.579	25.48	11.9569	41.8455
0.579	39.803	16.6179	0.58	42.5986	35.4067	50.6913	0.579	9.57525	14.0249	0.58	25.5843	12.0257	42.144
0.58	39.9629	16.6024	0.581	42.6318	35.4182	50.8041	0.58	9.63223	14.0221	0.581	25.684	12.0587	42.3172
0.581	40.1323	16.5872	0.582	42.6609	35.4043	50.9143	0.581	9.68466	14.0195	0.582	25.7793	12.0685	42.4671
0.582	40.3112	16.5722	0.583	42.6859	35.3875	51.0181	0.582	9.73248	14.0171	0.583	25.8702	12.0834	42.5981
0.583	40.5017	16.5575	0.584	42.7067	35.4299	51.1127	0.583	9.77566	14.0142	0.584	25.9567	12.1393	42.7121
0.584	40.7061	16.543	0.585	42.7234	35.4576	51.2026	0.584	9.81414	14.0103	0.585	26.0386	12.1862	42.8572
0.585	40.9242	16.5287	0.586	42.7362	35.4622	51.2849	0.585	9.8479	14.0054	0.586	26.116	12.225	43.0588
0.586	41.1558	16.5148	0.587	42.7452	35.4807	51.3598	0.586	9.8769	13.9994	0.587	26.1886	12.2468	43.1697
0.587	41.4007	16.5005	0.588	42.7507	35.498	51.463	0.587	9.90111	13.9923	0.588	26.2565	12.3069	43.3474
0.588	41.6585	16.4852	0.589	42.7528	35.5124	51.5388	0.588	9.9205	13.9843	0.589	26.3196	12.3619	43.5311
0.589	41.9292	16.469	0.59	42.7517	35.4367	51.5974	0.589	9.93506	13.9752	0.59	26.3776	12.4284	43.7004
0.59	42.2123	16.4519	0.591	42.7475	35.3752	51.6359	0.59	9.94478	13.9651	0.591	26.4304	12.4686	43.8072
0.591	42.5053	16.4339	0.592	42.7403	35.331	51.6399	0.591	9.94964	13.954	0.592	26.4777	12.4823	43.9157
0.592	42.8053	16.415	0.593	42.7295	35.2806	51.6606	0.592	9.94964	13.9418	0.593	26.5199	12.4921	44.0455
0.593	43.1121	16.3958	0.594	42.7147	35.2273	51.7094	0.593	9.94478	13.9288	0.594	26.557	12.4983	44.1645
0.594	43.4254	16.3771	0.595	42.6961	35.171	51.755	0.594	9.93506	13.9147	0.595	26.589	12.4858	44.2727
0.595	43.7449	16.3587	0.596	42.6737	35.0666	51.779	0.595	9.9205	13.8997	0.596	26.6157	12.4721	44.3697
0.596	44.0702	16.3409	0.597	42.648	35.0245	51.8162	0.596	9.90111	13.8837	0.597	26.6369	12.4809	44.4554
0.597	44.4011	16.3235	0.598	42.62	34.9266	51.8954	0.597	9.8769	13.8675	0.598	26.6526	12.5047	44.5295
0.598	44.7372	16.3065	0.599	42.5895	34.8072	51.962	0.598	9.8479	13.8516	0.599	26.6632	12.5616	44.5921
0.599	45.0782	16.2901	0.6	42.5565	34.6912	52.0474	0.599	9.81414	13.836	0.6	26.6686	12.6138	44.643
0.6	45.4238	16.2742	0.601	42.5208	34.6713	52.0937	0.6	9.77566	13.8209	0.601	26.6687	12.6347	44.6823
0.601	45.7761	16.2588	0.602	42.4826	34.5747	52.1275	0.601	9.73248	13.8061	0.602	26.6636	12.6547	44.7099
0.602	46.1371	16.244	0.603	42.442	34.4899	52.1414	0.602	9.68466	13.7918	0.603	26.6531	12.6964	44.7679
0.603	46.5065	16.2297	0.604	42.3987	34.5356	52.1507	0.603	9.63223	13.7779	0.604	26.6371	12.7758	44.8298
0.604	46.8839	16.2154	0.605	42.353	34.4382	52.1857	0.604	9.57525	13.7644	0.605	26.6159	12.8329	44.8792
0.605	47.269	16.2003	0.606	42.3049	34.3649	52.1508	0.605	9.51378	13.7514	0.606	26.5898	12.8645	44.9163
0.606	47.6613	16.1847	0.607	42.2547	34.3115	52.0823	0.606	9.44787	13.7382	0.607	26.559	12.865	44.941
0.607	48.0606	16.1683	0.608	42.2028	34.3341	52.0387	0.607	9.3776	13.7242	0.608	26.5232	12.8203	44.9532
0.608	48.4688	16.1514	0.609	42.1495	34.2918	51.9551	0.608	9.30302	13.7095	0.609	26.4821	12.7741	44.9531
0.609	48.888	16.1344	0.61	42.0945	34.257	51.8921	0.609	9.22421	13.694	0.61	26.4358	12.7448	44.9917
0.61	49.3153	16.1182	0.611	42.038	34.1412	51.8524	0.61	9.14125	13.6777	0.611	26.3844	12.7623	44.935
0.611	49.7479	16.1026	0.612	41.98	34.0251	51.848	0.611	9.05422	13.6608	0.612	26.3278	12.7514	44.8812
0.612	50.1854	16.0877	0.613	41.9206	33.8774	51.8347	0.612	8.96321	13.6431	0.613	26.2664	12.7418	44.8308
0.613	50.6273	16.0735	0.614	41.8598	33.7664	51.7816	0.613	8.86829	13.6248	0.614	26.2001	12.748	44.7045
0.614	51.0732	16.06	0.615	41.7973	33.7033	51.7133	0.614	8.76958	13.6057	0.615	26.1292	12.7527	44.5407
0.615	51.5227	16.0473	0.616	41.733	33.5421	51.6431	0.615	8.66715	13.586	0.616	26.0542	12.7665	44.3679
0.616	51.9753	16.0353	0.617	41.6672	33.4244	51.6904	0.616	8.56112	13.5663	0.617	25.9752	12.7329	44.1867
0.617	52.4306	16.0235	0.618	41.6	33.2802	51.7564	0.617	8.45159	13.5473	0.618	25.8923	12.6822	43.9972
0.618	52.8882	16.0112	0.619	41.5313	33.1363	51.7756	0.618	8.33866	13.5289	0.619	25.8057	12.6574	43.7996
0.619	53.35	15.9984	0.62	41.4613	33.0161	51.7479	0.619	8.22244	13.5112	0.62	25.7156	12.6053	43.5945
0.62	53.8179	15.9851	0.621	41.3898	32.898	51.7034	0.62	8.10305	13.4942	0.621	25.6222	12.5518	43.3826
0.621	54.2917	15.9714	0.622	41.3169	32.78	51.604	0.621	7.9806	13.4779	0.622	25.5257	12.5661	43.164
0.622	54.7707	15.9572	0.623	41.2431	32.615	51.5219	0.622	7.85522	13.4617	0.623	25.4263	12.5824	42.9395
0.623	55.2545	15.9426	0.624	41.1686	32.4349	51.4361	0.623	7.72702	13.4451	0.624	25.3242	12.4935	42.7097
0.624	55.7427	15.9276	0.625	41.0934	32.2868	51.3465	0.624	7.59613	13.4279	0.625	25.22	12.436	42.5083
0.625	56.2347	15.9122	0.626	41.0179	32.1494	51.2536	0.625	7.46269	13.4102	0.626	25.1141	12.4372	42.3092
0.626	56.7302	15.8965	0.627	40.9422	32.0116	51.1576	0.626	7.32681	13.3921	0.627	25.0065	12.4342	42.1053
0.627	57.2285	15.8803	0.628	40.8664	31.88	51.0667	0.627	7.18863	13.3735	0.628	24.8974	12.4138	41.897
0.628	57.7292	15.8638	0.629	40.7906	31.7484	51.0153	0.628	7.04829	13.3545	0.629	24.7869	12.4008	41.6844
0.629	58.2295	15.8476	0.63	40.7149	31.5978	50.9608	0.629	6.90593	13.3351	0.63	24.6751	12.3737	41.4676
0.63	58.7263	15.8324	0.631	40.6393	31.4488	50.9026	0.63	6.76168	13.3152	0.631	24.562	12.3539	41.2468
0.631	59.2217	15.8181	0.632	40.5642	31.3025	50.9029	0.631	6.61568	13.2951	0.632	24.4474	12.3341	41.0355
0.632	59.7175	15.8048	0.633	40.4893	31.163	50.9456	0.632	6.46808	13.2745	0.633	24.3315	12.3145	40.8301
0.633	60.2133	15.7918	0.634	40.4145	31.0002	50.9846	0.633	6.31902	13.2537	0.634	24.2144	12.295	40.6008
0.634	60.7086	15.7786	0.635	40.3397	30.8572	50.9703	0.634	6.16865	13.2325	0.635	24.0962	12.274	40.3389
0.635	61.2029	15.7652	0.636	40.265	30.7598	50.9267	0.635	6.01712	13.211	0.636	23.977	12.2364	40.0748
0.636	61.6958	15.7515	0.637	40.1899	30.671	50.8689	0.636	5.86456	13.1893	0.637	23.857	12.2107	39.8086
0.637	62.1867	15.7375	0.638	40.1147	30.5859	50.8202	0.637	5.71114	13.1673	0.638	23.736	12.151	39.5403
0.638	62.6751	15.7234	0.639	40.0395	30.4891	50.764	0.638	5.55699	13.1451	0.639	23.6143	12.0831	39.2698
0.639	63.1607	15.7091	0.64	39.9648	30.388	50.7583	0.639	5.40228	13.1227	0.64	23.492	12.0303	38.9973
0.64	63.6429	15.6945	0.641	39.8909	30.2919	50.7601	0.64	5.24715	13.1001	0.641	23.3695	11.9942	38.7818
0.641	64.1212	15.6799	0.642	39.818	30.2159	50.7452	0.641	5.09175	13.0773	0.642	23.2472	11.9179	38.622
0.642	64.5928	15.665	0.643	39.7459	30.1546	50.6957	0.642	4.93624	13.0551	0.643	23.125	11.8382	38.462
0.643	65.0548	15.65	0.644	39.6746	30.0822	50.6447	0.643	4.78077	13.0333	0.644	23.0033	11.7338	38.3022
0.644	65.5066	15.6356	0.645	39.6043	30.0097	50.5926	0.644	4.62549	13.0115	0.645	22.8824	11.7517	38.0498
0.645	65.9479	15.6222	0.646	39.5353	29.8991	50.5395	0.645	4.47055	12.9896	0.646	22.7624	11.6528	37.7492
0.646	66.3783	15.6101	0.647	39.4675	29.7923	50.4855	0.646	4.3161	12.9676	0.647	22.6435	11.5427	37.5131
0.647	66.7997	15.5985	0.648	39.4012	29.7129	50.4595	0.647	4.1623	12.9456	0.648	22.5256	11.448	37.2336
0.648	67.2142	15.5868	0.649	39.3366	29.6442	50.3777	0.648	4.00929	12.9236	0.649	22.4091	11.3674	36.8859
0.649	67.6213	15.5751	0.65	39.2735	29.5574	50.3243	0.649	3.85723	12.9016	0.65	22.2939	11.2745	36.6322
0.65	68.0207	15.5633	0.651	39.2119	29.484	50.2358	0.65	3.70625	12.8796	0.651	22.1802	11.1932	36.377
0.651	68.412	15.5514	0.652	39.1518	29.3856	50.1758	0.651	3.55652	12.8577	0.652	22.0678	11.1887	36.1207
0.652	68.7947	15.5396	0.653	39.093	29.3201	50.1618	0.652	3.40817	12.8358	0.653	21.9569	11.1745	35.8063
0.653	69.1686	15.5277	0.654	39.0354	29.2528	50.1096	0.653	3.26136	12.8141	0.654	21.8474	11.1601	35.4523
0.654	69.5332	15.5158	0.655	38.9785	29.1716	50.0543	0.654	3.11622	12.7925	0.655	21.7395	11.143	35.1319
0.655	69.8882	15.5039	0.656	38.922	29.0952	49.9978	0.655	2.97289	12.771	0.656	21.6334	11.0778	34.8727
0.656	70.2332	15.4921	0.657	38.8656	29.0235	49.9401	0.656	2.83152	12.7497	0.657	21.5298	11.1103	34.7002
0.657	70.568	15.4802	0.658	38.809	28.9563	49.9191	0.657	2.69225	12.7285	0.658	21.4292	11.1443	34.6612
0.658	70.8922	15.4685	0.659	38.7519	28.8932	49.9028	0.658	2.55521	12.7076	0.659	21.3313	11.1297	34.6304
0.659	71.2054	15.4567	0.66	38.6939	28.8336	49.8853	0.659	2.42053	12.6862	0.66	21.2363	11.0746	34.5466
0.66	71.5073	15.445	0.661	38.6351	28.7777	49.8646	0.66	2.28834	12.6639	0.661	21.1441	11.0339	34.4216
0.661	71.7978	15.4335	0.662	38.5758	28.7261	49.7653	0.661	2.15879	12.6405	0.662	21.0549	10.9824	34.282
0.662	72.0764	15.4226	0.663	38.5164	28.6793	49.6357	0.662	2.03198	12.6161	0.663	20.9683	10.8986	34.0463
0.663	72.3429	15.4124	0.664	38.4566	28.621	49.5054	0.663	1.90805	12.5915	0.664	20.884	10.7822	33.8059
0.664	72.5971	15.4024	0.665	38.3966	28.549	49.4203	0.664	1.78711	12.5672	0.665	20.802	10.7337	33.567
0.665	72.8387	15.3925	0.666	38.3368	28.48	49.4349	0.665	1.6693	12.5432	0.666	20.7227	10.7255	33.3299
0.666	73.0674	15.3827	0.667	38.2773	28.4144	49.4475	0.666	1.55471	12.5196	0.667	20.6458	10.6889	33.0942
0.667	73.2831	15.373	0.668	38.2182	28.3522	49.4162	0.667	1.44346	12.4964	0.668	20.571	10.6562	32.9307
0.668	73.4855	15.3635	0.669	38.1593	28.2935	49.3263	0.668	1.33566	12.4737	0.669	20.4978	10.6271	32.7908
0.669	73.6744	15.3541	0.67	38.1007	28.2488	49.2402	0.669	1.23143	12.4514	0.67	20.426	10.6015	32.6109
0.67	73.8497	15.3449	0.671	38.042	28.2439	49.1668	0.67	1.13084	12.4295	0.671	20.3561	10.5799	32.4037
0.671	74.0112	15.3359	0.672	37.9834	28.2068	49.0905	0.671	1.03402	12.4082	0.672	20.2881	10.5646	32.1971
0.672	74.1587	15.3271	0.673	37.9252	28.1232	48.9805	0.672	0.941043	12.3874	0.673	20.222	10.5283	32.012
0.673	74.292	15.3184	0.674	37.8677	28.0699	48.915	0.673	0.852009	12.3671	0.674	20.1576	10.4587	31.8348
0.674	74.4111	15.31	0.675	37.8113	28.0326	48.8731	0.674	0.767005	12.3474	0.675	20.0951	10.4375	31.6582
0.675	74.5159	15.3017	0.676	37.7564	27.9658	48.7935	0.675	0.686112	12.3282	0.676	20.0345	10.4578	31.5701
0.676	74.6061	15.2937	0.677	37.7028	27.9457	48.715	0.676	0.609409	12.3097	0.677	19.9758	10.4158	31.507
0.677	74.6818	15.2865	0.678	37.6505	27.8649	48.66	0.677	0.536973	12.2917	0.678	19.9192	10.3997	31.4431
0.678	74.7453	15.2802	0.679	37.5998	27.75	48.5803	0.678	0.468873	12.2744	0.679	19.8648	10.4205	31.4022
0.679	74.7989	15.2742	0.68	37.5511	27.6667	48.5434	0.679	0.405176	12.2577	0.68	19.813	10.4409	31.3575
0.68	74.8427	15.2683	0.681	37.5044	27.6171	48.5231	0.68	0.345944	12.2411	0.681	19.7641	10.458	31.1948
0.681	74.8765	15.2628	0.682	37.4598	27.5915	48.4821	0.681	0.291235	12.2239	0.682	19.7179	10.4799	31.029
0.682	74.9004	15.2574	0.683	37.4176	27.5682	48.4431	0.682	0.241103	12.2061	0.683	19.6743	10.4989	30.8935
0.683	74.9142	15.2524	0.684	37.3783	27.5488	48.4062	0.683	0.195596	12.1877	0.684	19.6336	10.531	30.8048
0.684	74.9205	15.2476	0.685	37.3421	27.5365	48.3387	0.684	0.154759	12.1688	0.685	19.5959	10.4914	30.7176
0.685	74.9217	15.243	0.686	37.3089	27.5316	48.2452	0.685	0.118633	12.1494	0.686	19.5612	10.477	30.5185
0.686	74.9177	15.2388	0.687	37.2791	27.5342	48.1683	0.686	0.087251	12.1295	0.687	19.5297	10.5096	30.3881
0.687	74.9085	15.2348	0.688	37.2525	27.5438	48.1248	0.687	0.0606453	12.1092	0.688	19.5013	10.5287	30.2843
0.688	74.8942	15.2311	0.689	37.2296	27.5226	48.0451	0.688	0.0388415	12.0883	0.689	19.4759	10.5024	30.1561
0.689	74.8748	15.2277	0.69	37.211	27.4444	48.0085	0.689	0.0218608	12.0677	0.69	19.4534	10.4656	30.0745
0.69	74.8503	15.2245	0.691	37.1974	27.4398	47.9943	0.69	0.00971986	12.0479	0.691	19.4337	10.5478	29.9747
0.691	74.8232	15.2217	0.692	37.1891	27.4256	47.9876	0.691	0.00243056	12.029	0.692	19.4169	10.5204	29.8547
0.692	74.7958	15.2191	0.693	37.1863	27.4184	47.9855	0.692	0	12.011	0.693	19.4025	10.555	29.7942
0.693	74.7683	15.2169	0.694	37.1889	27.418	47.988	0.693	0	11.9938	0.694	19.3898	10.591	29.7408
0.694	74.7406	15.2143	0.695	37.1966	27.4242	47.9949	0.694	0	11.9776	0.695	19.3788	10.5787	29.6815
0.695	74.7129	15.2114	0.696	37.2093	27.4365	47.9793	0.695	0	11.9617	0.696	19.3696	10.5599	29.685
0.696	74.685	15.2088	0.697	37.2273	27.4555	47.9611	0.696	0	11.9455	0.697	19.3619	10.4997	29.6545
0.697	74.6571	15.2065	0.698	37.2509	27.566	47.947	0.697	0	11.929	0.698	19.3556	10.4776	29.6161
0.698	74.6292	15.2045	0.699	37.2802	27.6826	47.9367	0.698	0	11.9122	0.699	19.3505	10.4298	29.5615
0.699	74.6012	15.2028	0.7	37.315	27.6813	47.9395	0.699	0	11.8952	0.7	19.3465	10.3926	29.5046
0.7	74.5733	15.2014	0.701	37.3556	27.6851	47.963	0.7	0	11.8778	0.701	19.3433	10.3826	29.4764
0.701	74.5455	15.2004	0.702	37.4019	27.6962	48.0165	0.701	0	11.8603	0.702	19.3413	10.3951	29.4323
0.702	74.5153	15.1996	0.703	37.4532	27.6934	48.0199	0.702	0	11.8426	0.703	19.3403	10.4193	29.3787
0.703	74.4803	15.1992	0.704	37.509	27.7078	47.9995	0.703	0	11.8246	0.704	19.3402	10.3724	29.3741
0.704	74.4406	15.1991	0.705	37.5687	27.7297	48.0923	0.704	0	11.8065	0.705	19.3408	10.3666	29.2846
0.705	74.3962	15.1993	0.706	37.6324	27.7825	48.1125	0.705	0	11.7882	0.706	19.3419	10.3131	29.1433
0.706	74.3473	15.1998	0.707	37.7001	27.8589	48.1275	0.706	0	11.7698	0.707	19.3436	10.2656	29.0635
0.707	74.2912	15.2006	0.708	37.7717	28.0027	48.1826	0.707	0	11.7512	0.708	19.3457	10.2551	29.0425
0.708	74.2258	15.2024	0.709	37.8467	28.1765	48.2513	0.708	0	11.7326	0.709	19.348	10.265	29.0501
0.709	74.1511	15.2051	0.71	37.9247	28.2286	48.3239	0.709	0	11.7138	0.71	19.3503	10.221	29.0579
0.71	74.0671	15.2082	0.711	38.0054	28.3356	48.4259	0.71	0	11.6956	0.711	19.3524	10.1818	29.1045
0.711	73.9739	15.2115	0.712	38.0886	28.3916	48.4871	0.711	0	11.6786	0.712	19.3544	10.1481	29.1132
0.712	73.8717	15.2151	0.713	38.1743	28.4138	48.5383	0.712	0	11.6629	0.713	19.3562	10.1163	29.1232
0.713	73.7604	15.2191	0.714	38.2619	28.4828	48.6279	0.713	0	11.6484	0.714	19.3575	10.1465	29.1844
0.714	73.6403	15.2233	0.715	38.3513	28.6211	48.6436	0.714	0	11.6351	0.715	19.3579	10.1896	29.1871
0.715	73.5114	15.2279	0.716	38.4424	28.7659	48.7028	0.715	0	11.6232	0.716	19.3575	10.2055	29.1826
0.716	73.3739	15.2327	0.717	38.5346	28.9155	48.8229	0.716	0	11.6118	0.717	19.3564	10.2157	29.1294
0.717	73.2279	15.2378	0.718	38.6276	29.0698	48.9122	0.717	0	11.6005	0.718	19.3545	10.2179	29.1059
0.718	73.0735	15.2432	0.719	38.7213	29.2288	48.9971	0.718	0	11.5893	0.719	19.3515	10.2081	29.1598
0.719	72.911	15.2488	0.72	38.8158	29.4083	49.0653	0.719	0	11.5781	0.72	19.3476	10.1996	29.2519
0.72	72.7404	15.2548	0.721	38.9111	29.5165	49.1358	0.72	0	11.5669	0.721	19.3428	10.2032	29.3422
0.721	72.5619	15.2609	0.722	39.0072	29.6292	49.2082	0.721	0	11.5559	0.722	19.3367	10.2569	29.301
0.722	72.3757	15.2674	0.723	39.1035	29.7623	49.2908	0.722	0	11.5449	0.723	19.3295	10.3109	29.2435
0.723	72.182	15.2741	0.724	39.2	29.9389	49.3883	0.723	0	11.534	0.724	19.3209	10.3343	29.2936
0.724	71.9809	15.281	0.725	39.2967	30.0417	49.4847	0.724	0	11.5232	0.725	19.3108	10.3573	29.2917
0.725	71.7752	15.2882	0.726	39.3939	30.1651	49.5654	0.725	0	11.5125	0.726	19.2992	10.3602	29.3329
0.726	71.5673	15.2956	0.727	39.4919	30.3624	49.6472	0.726	0	11.502	0.727	19.2861	10.3275	29.332
0.727	71.3576	15.3032	0.728	39.5905	30.5725	49.6712	0.727	0	11.4916	0.728	19.2715	10.2951	29.3686
0.728	71.1463	15.311	0.729	39.6895	30.8114	49.7391	0.728	0	11.4813	0.729	19.2554	10.2631	29.4558
0.729	70.9334	15.319	0.73	39.7884	30.9321	49.7612	0.729	0	11.4712	0.73	19.2376	10.2218	29.5053
0.73	70.7193	15.3273	0.731	39.8869	31.0142	49.8798	0.73	0	11.4613	0.731	19.2176	10.1616	29.5289
0.731	70.5018	15.3357	0.732	39.9842	31.0969	49.998	0.731	0	11.4515	0.732	19.1953	10.1324	29.5199
0.732	70.2785	15.3443	0.733	40.0799	31.154	50.0164	0.732	0	11.4419	0.733	19.1706	10.1024	29.5146
0.733	70.0498	15.3531	0.734	40.1738	31.2693	50.0487	0.733	0	11.4319	0.734	19.1437	10.0716	29.5811
0.734	69.8158	15.3621	0.735	40.2656	31.376	50.1673	0.734	0	11.4208	0.735	19.1147	10.0404	29.501
0.735	69.5768	15.3712	0.736	40.3553	31.4642	50.2237	0.735	0	11.4087	0.736	19.0837	10.0088	29.4305
0.736	69.3331	15.3804	0.737	40.4437	31.5257	50.3845	0.736	0	11.3956	0.737	19.0507	9.99931	29.3953
0.737	69.0847	15.3898	0.738	40.5313	31.6479	50.4701	0.737	0	11.382	0.738	19.0156	10.0172	29.3821
0.738	68.8321	15.3993	0.739	40.6179	31.7512	50.5217	0.738	0	11.3687	0.739	18.9783	10.0502	29.3774
0.739	68.5754	15.409	0.74	40.7033	31.8638	50.6074	0.739	0	11.3557	0.74	18.9387	10.0586	29.3685
0.74	68.3149	15.4187	0.741	40.7871	31.9216	50.6905	0.74	0	11.343	0.741	18.8967	10.0137	29.3072
0.741	68.0533	15.4286	0.742	40.8695	32.0274	50.7614	0.741	0	11.3305	0.742	18.8523	9.94946	29.2375
0.742	67.7932	15.4385	0.743	40.9508	32.0729	50.8938	0.742	0	11.3184	0.743	18.8058	9.93209	29.2179
0.743	67.5349	15.4486	0.744	41.0307	32.1671	50.9118	0.743	0	11.3065	0.744	18.7575	9.97236	29.1755
0.744	67.2787	15.4587	0.745	41.1095	32.2476	50.9389	0.744	0	11.295	0.745	18.7076	9.92059	29.0649
0.745	67.0224	15.4688	0.746	41.1868	32.3623	50.9766	0.745	0	11.2838	0.746	18.6561	9.87398	28.9296
0.746	66.7639	15.479	0.747	41.2624	32.447	51.035	0.746	0	11.273	0.747	18.603	9.8739	28.8059
0.747	66.5032	15.4893	0.748	41.3362	32.5317	51.1153	0.747	0	11.2626	0.748	18.5483	9.86056	28.6781
0.748	66.2408	15.4996	0.749	41.4087	32.617	51.1255	0.748	0	11.2525	0.749	18.4917	9.78278	28.6365
0.749	65.9769	15.5099	0.75	41.4802	32.703	51.1331	0.749	0	11.2428	0.75	18.4331	9.77234	28.7083
0.75	65.7141	15.5202	0.751	41.5507	32.7505	51.2	0.75	0	11.2335	0.751	18.372	9.77523	28.7705
0.751	65.4552	15.5305	0.752	41.6205	32.8279	51.3107	0.751	0	11.2245	0.752	18.3088	9.78003	28.7449
0.752	65.2003	15.5409	0.753	41.6896	32.9121	51.3255	0.752	0	11.216	0.753	18.2437	9.7837	28.6792
0.753	64.9498	15.5512	0.754	41.7581	32.9894	51.3305	0.753	0	11.2079	0.754	18.1767	9.76772	28.5703
0.754	64.7039	15.5614	0.755	41.8262	33.0534	51.4272	0.754	0	11.2003	0.755	18.108	9.73476	28.4575
0.755	64.4653	15.5717	0.756	41.8942	33.1337	51.5753	0.755	0	11.1924	0.756	18.0375	9.69139	28.3409
0.756	64.2366	15.5819	0.757	41.9621	33.1897	51.6315	0.756	0	11.1837	0.757	17.9654	9.62122	28.2205
0.757	64.0181	15.592	0.758	42.0297	33.2159	51.689	0.757	0	11.1742	0.758	17.8917	9.54406	28.1242
0.758	63.8099	15.602	0.759	42.0964	33.2327	51.7194	0.758	0	11.1639	0.759	17.8164	9.48568	28.0046
0.759	63.6123	15.612	0.76	42.1618	33.2503	51.7492	0.759	0	11.1534	0.76	17.7396	9.40273	27.8269
0.76	63.4254	15.6219	0.761	42.2256	33.2908	51.8314	0.76	0	11.1434	0.761	17.6611	9.32119	27.6782
0.761	63.2495	15.6317	0.762	42.2876	33.3685	51.9887	0.761	0	11.1339	0.762	17.5806	9.27239	27.5172
0.762	63.0847	15.6414	0.763	42.3478	33.3172	52.0305	0.762	0	11.1248	0.763	17.4978	9.27496	27.3412
0.763	62.9288	15.651	0.764	42.4059	33.3397	52.018	0.763	0	11.1163	0.764	17.413	9.27854	27.1673
0.764	62.7794	15.6604	0.765	42.4617	33.3491	52.0382	0.764	0	11.1083	0.765	17.3267	9.18913	27.0516
0.765	62.6368	15.6697	0.766	42.5153	33.4153	52.0317	0.765	0	11.1008	0.766	17.2389	9.07726	26.944
0.766	62.501	15.6789	0.767	42.5664	33.4922	52.097	0.766	0	11.0939	0.767	17.1496	8.98956	26.8093
0.767	62.3722	15.6879	0.768	42.6148	33.542	52.1762	0.767	0	11.0874	0.768	17.0587	8.91449	26.648
0.768	62.2505	15.6968	0.769	42.6605	33.5411	52.1937	0.768	0	11.0816	0.769	16.9665	8.78977	26.5157
0.769	62.136	15.7055	0.77	42.7033	33.5565	52.322	0.769	0	11.0762	0.77	16.8731	8.76105	26.4558
0.77	62.0289	15.714	0.771	42.7437	33.5634	52.4386	0.77	0	11.0715	0.771	16.7789	8.67203	26.391
0.771	61.9292	15.7223	0.772	42.7819	33.5876	52.5414	0.771	0	11.0672	0.772	16.6841	8.5699	26.2323
0.772	61.8346	15.7304	0.773	42.8179	33.5756	52.6836	0.772	0	11.0636	0.773	16.589	8.54273	26.0362
0.773	61.7428	15.7383	0.774	42.8516	33.5637	52.7715	0.773	0	11.0605	0.774	16.4936	8.47196	25.8384
0.774	61.6539	15.746	0.775	42.883	33.537	52.8075	0.774	0	11.0573	0.775	16.3981	8.34244	25.6227
0.775	61.5679	15.7535	0.776	42.9121	33.4747	52.8311	0.775	0	11.0535	0.776	16.3028	8.17226	25.4092
0.776	61.485	15.7608	0.777	42.9389	33.4531	52.8546	0.776	0	11.0489	0.777	16.2085	8.07983	25.2389
0.777	61.4052	15.7678	0.778	42.9637	33.4582	52.8871	0.777	0.00243056	11.0437	0.778	16.1154	7.9981	25.0895
0.778	61.3286	15.7746	0.779	42.9867	33.4888	52.8772	0.778	0.00971986	11.0378	0.779	16.0235	7.92019	24.9604
0.779	61.2552	15.7812	0.78	43.0079	33.5176	52.9059	0.779	0.0218608	11.0312	0.78	15.933	7.84617	24.8293
0.78	61.1852	15.7875	0.781	43.0266	33.5118	52.9355	0.78	0.0388415	11.024	0.781	15.8439	7.79126	24.733
0.781	61.1187	15.7935	0.782	43.0425	33.5035	52.9614	0.781	0.0606453	11.0161	0.782	15.7566	7.75342	24.6596
0.782	61.0555	15.7993	0.783	43.0557	33.5315	52.9838	0.782	0.0896816	11.0075	0.783	15.6712	7.664	24.5785
0.783	60.996	15.8048	0.784	43.0669	33.5058	53.0192	0.783	0.128352	10.9983	0.784	15.588	7.59677	24.4647
0.784	60.9376	15.81	0.785	43.0762	33.4542	53.0899	0.784	0.17662	10.9885	0.785	15.5073	7.53892	24.4159
0.785	60.8779	15.8149	0.786	43.0835	33.4462	53.1252	0.785	0.234438	10.978	0.786	15.4293	7.45597	24.3518
0.786	60.8172	15.8196	0.787	43.0889	33.4392	53.1842	0.786	0.304179	10.9676	0.787	15.3544	7.3669	24.2332
0.787	60.7553	15.8239	0.788	43.0922	33.4331	53.2454	0.787	0.388206	10.9578	0.788	15.2824	7.28277	24.1295
0.788	60.6924	15.828	0.789	43.0934	33.428	53.2766	0.788	0.486437	10.9487	0.789	15.2136	7.20369	24.0279
0.789	60.6286	15.8318	0.79	43.0924	33.4239	53.2697	0.789	0.598777	10.9402	0.79	15.148	7.12972	23.9083
0.79	60.5638	15.8353	0.791	43.0894	33.4214	53.2649	0.79	0.725114	10.9325	0.791	15.0858	7.0868	23.8141
0.791	60.4982	15.8384	0.792	43.0844	33.4114	53.2773	0.791	0.865327	10.9254	0.792	15.0273	7.085	23.6983
0.792	60.4343	15.8413	0.793	43.0775	33.3867	53.3006	0.792	1.01928	10.919	0.793	14.9725	7.13461	23.5798
0.793	60.3745	15.8438	0.794	43.0696	33.3633	53.3385	0.793	1.18681	10.9134	0.794	14.9214	7.11418	23.4719
0.794	60.3189	15.8454	0.795	43.0611	33.3418	53.3699	0.794	1.36778	10.9084	0.795	14.8742	7.035	23.3883
0.795	60.2675	15.8461	0.796	43.052	33.322	53.3946	0.795	1.56198	10.9042	0.796	14.8309	6.96481	23.2787
0.796	60.2205	15.8464	0.797	43.0421	33.294	53.4112	0.796	1.76925	10.9007	0.797	14.7916	6.89986	23.1176
0.797	60.1778	15.8464	0.798	43.0308	33.2564	53.3802	0.797	1.98937	10.8979	0.798	14.7567	6.9297	22.9735
0.798	60.1395	15.8461	0.799	43.0174	33.2264	53.3445	0.798	2.22213	10.8952	0.799	14.7259	6.91593	22.8436
0.799	60.1057	15.8455	0.8	43.0019	33.1975	53.304	0.799	2.4673	10.892	0.8	14.6991	6.99347	22.741
0.8	60.0763	15.8446	0.801	42.9843	33.1682	53.2589	0.8	2.72465	10.8882	0.801	14.6764	6.98102	22.7388
0.801	60.0514	15.8433	0.802	42.9648	33.1386	53.2245	0.801	2.99391	10.884	0.802	14.6575	6.94484	22.7871
0.802	60.0286	15.8418	0.803	42.9433	33.108	53.199	0.802	3.27484	10.8791	0.803	14.6424	6.92804	22.7811
0.803	60.0055	15.8399	0.804	42.9194	33.0759	53.1683	0.803	3.56714	10.8738	0.804	14.6308	6.93634	22.7673
0.804	59.982	15.8377	0.805	42.893	33.0492	53.1326	0.804	3.87055	10.868	0.805	14.6227	6.94915	22.7
0.805	59.9583	15.8352	0.806	42.8639	33.0379	53.0727	0.805	4.18476	10.8616	0.806	14.6176	6.96636	22.6938
0.806	59.9344	15.8324	0.807	42.8319	33.0506	53.0175	0.806	4.50946	10.8548	0.807	14.6153	6.98788	22.8223
0.807	59.9102	15.8293	0.808	42.7972	33.0616	52.9369	0.807	4.84434	10.8474	0.808	14.6155	7.01195	22.7204
0.808	59.8858	15.8259	0.809	42.7596	33.071	52.8415	0.808	5.18906	10.8396	0.809	14.6181	6.99393	22.8418
0.809	59.8613	15.8222	0.81	42.7187	33.0784	52.7409	0.809	5.54331	10.8313	0.81	14.623	7.0009	22.8207
0.81	59.8366	15.8176	0.811	42.6746	33.0648	52.6349	0.81	5.90672	10.8232	0.811	14.6297	7.01581	22.7818
0.811	59.8117	15.8121	0.812	42.6274	33.013	52.5319	0.811	6.27894	10.8158	0.812	14.638	7.10234	22.7741
0.812	59.7868	15.8062	0.813	42.5772	32.978	52.4376	0.812	6.65961	10.8093	0.813	14.6479	7.08285	22.7698
0.813	59.7617	15.8001	0.814	42.5243	32.9348	52.3385	0.813	7.04835	10.8035	0.814	14.6591	7.03362	22.6957
0.814	59.7367	15.7938	0.815	42.4688	32.8849	52.2345	0.814	7.44479	10.7986	0.815	14.6715	6.9774	22.6696
0.815	59.7115	15.7871	0.816	42.4106	32.8353	52.1259	0.815	7.84854	10.7945	0.816	14.6853	6.95725	22.6363
0.816	59.6864	15.7802	0.817	42.3499	32.8195	52.0128	0.816	8.25921	10.7913	0.817	14.7002	6.958	22.639
0.817	59.6613	15.7731	0.818	42.2868	32.761	51.9161	0.817	8.67639	10.7882	0.818	14.7159	6.917	22.6517
0.818	59.6362	15.7657	0.819	42.2211	32.7085	51.829	0.818	9.09967	10.7847	0.819	14.7326	6.90829	22.7469
0.819	59.6112	15.7581	0.82	42.1533	32.6239	51.7388	0.819	9.52865	10.7808	0.82	14.7502	6.92292	22.8432
0.82	59.5838	15.7502	0.821	42.0836	32.5652	51.646	0.82	9.9629	10.7765	0.821	14.7684	6.97792	22.9286
0.821	59.5517	15.7421	0.822	42.0119	32.525	51.5503	0.821	10.402	10.7717	0.822	14.7872	6.96147	23.0723
0.822	59.5149	15.7338	0.823	41.9385	32.4837	51.4521	0.822	10.8455	10.7665	0.823	14.8066	7.00376	23.1134
0.823	59.4734	15.7253	0.824	41.8633	32.4397	51.3516	0.823	11.293	10.761	0.824	14.8266	7.06538	23.2572
0.824	59.4272	15.7166	0.825	41.7866	32.3724	51.2488	0.824	11.7441	10.755	0.825	14.8471	7.12738	23.373
0.825	59.3765	15.7077	0.826	41.7086	32.3034	51.1442	0.825	12.1982	10.7486	0.826	14.8677	7.14188	23.4862
0.826	59.3212	15.6986	0.827	41.6293	32.2325	51.0738	0.826	12.6551	10.7418	0.827	14.888	7.12032	23.57
0.827	59.2614	15.6894	0.828	41.5486	32.1598	50.9705	0.827	13.1141	10.7347	0.828	14.9079	7.18484	23.5735
0.828	59.1972	15.68	0.829	41.4665	32.0817	50.8558	0.828	13.5749	10.7271	0.829	14.9276	7.27005	23.715
0.829	59.1287	15.6704	0.83	41.3832	31.9979	50.7877	0.829	14.0371	10.7192	0.83	14.9469	7.30739	23.853
0.83	59.0558	15.6601	0.831	41.2985	31.945	50.717	0.83	14.5001	10.711	0.831	14.9658	7.37921	24.0141
0.831	58.9787	15.649	0.832	41.2121	31.886	50.6028	0.831	14.9635	10.7023	0.832	14.9845	7.40949	24.1769
0.832	58.895	15.6377	0.833	41.1242	31.8137	50.4301	0.832	15.4269	10.6934	0.833	15.0033	7.40613	24.2474
0.833	58.8024	15.6264	0.834	41.0348	31.7237	50.2917	0.833	15.8898	10.6841	0.834	15.0224	7.36636	24.3384
0.834	58.7009	15.6149	0.835	40.944	31.6333	50.1498	0.834	16.3517	10.6744	0.835	15.0417	7.33005	24.3884
0.835	58.5907	15.6034	0.836	40.8521	31.5692	50.0063	0.835	16.8123	10.6645	0.836	15.0615	7.29716	24.3926
0.836	58.4719	15.5918	0.837	40.7592	31.536	49.8974	0.836	17.271	10.6542	0.837	15.082	7.26808	24.4119
0.837	58.3445	15.5801	0.838	40.6654	31.5033	49.7865	0.837	17.7274	10.6437	0.838	15.1034	7.24284	24.4799
0.838	58.2112	15.5684	0.839	40.5707	31.4235	49.6936	0.838	18.1811	10.6328	0.839	15.1256	7.19668	24.6205
0.839	58.0745	15.5566	0.84	40.4754	31.327	49.6321	0.839	18.6316	10.6217	0.84	15.1485	7.14762	24.7433
0.84	57.9345	15.5448	0.841	40.3796	31.2262	49.5701	0.84	19.0785	10.6109	0.841	15.1719	7.17419	24.7428
0.841	57.7913	15.5329	0.842	40.2833	31.1259	49.4879	0.841	19.5213	10.6012	0.842	15.1957	7.20021	24.8213
0.842	57.6452	15.5211	0.843	40.1865	31.0692	49.3034	0.842	19.9596	10.5924	0.843	15.22	7.17622	24.941
0.843	57.4962	15.5092	0.844	40.0894	30.9924	49.1258	0.843	20.393	10.5841	0.844	15.2449	7.14345	25.0599
0.844	57.3445	15.4974	0.845	39.9921	30.9042	49.0301	0.844	20.8211	10.5755	0.845	15.2703	7.11619	25.1569
0.845	57.1927	15.485	0.846	39.895	30.8332	48.9342	0.845	21.2434	10.5667	0.846	15.2961	7.09152	25.2237
0.846	57.0433	15.4713	0.847	39.7984	30.7521	48.8388	0.846	21.6595	10.5577	0.847	15.3227	7.1086	25.2672
0.847	56.8965	15.4564	0.848	39.7031	30.6508	48.7445	0.847	22.0691	10.5485	0.848	15.3506	7.14241	25.3099
0.848	56.7501	15.441	0.849	39.609	30.5784	48.6512	0.848	22.4717	10.5391	0.849	15.3799	7.17895	25.3628
0.849	56.6016	15.4256	0.85	39.5157	30.4606	48.5221	0.849	22.8669	10.5295	0.85	15.4105	7.18303	25.4716
0.85	56.4514	15.4103	0.851	39.4236	30.342	48.4208	0.85	23.2543	10.5197	0.851	15.4425	7.17288	25.5992
0.851	56.2994	15.3951	0.852	39.3327	30.2931	48.277	0.851	23.6336	10.5098	0.852	15.4761	7.17691	25.7425
0.852	56.1459	15.3801	0.853	39.2431	30.2492	48.1758	0.852	24.0044	10.4997	0.853	15.5115	7.20547	25.8108
0.853	55.991	15.3652	0.854	39.1551	30.1902	48.0744	0.853	24.3663	10.4894	0.854	15.5486	7.20567	25.8917
0.854	55.8349	15.3504	0.855	39.0688	30.0744	47.9412	0.854	24.719	10.479	0.855	15.5876	7.22454	25.974
0.855	55.6777	15.3359	0.856	38.9843	29.9605	47.8087	0.855	25.0622	10.4685	0.856	15.6284	7.24586	26.0555
0.856	55.5196	15.3215	0.857	38.9016	29.8486	47.6897	0.856	25.3954	10.4579	0.857	15.6706	7.23112	26.1356
0.857	55.3607	15.3073	0.858	38.8209	29.7483	47.6317	0.857	25.7184	10.4472	0.858	15.7136	7.21791	26.1769
0.858	55.2012	15.2933	0.859	38.7427	29.6958	47.5368	0.858	26.0308	10.4363	0.859	15.7574	7.2639	26.2709
0.859	55.0412	15.2795	0.86	38.667	29.6458	47.4313	0.859	26.3324	10.4254	0.86	15.8021	7.31758	26.4087
0.86	54.8809	15.266	0.861	38.5943	29.5768	47.3171	0.86	26.6229	10.4144	0.861	15.8477	7.37228	26.5174
0.861	54.7204	15.2527	0.862	38.5249	29.5242	47.2282	0.861	26.9019	10.4034	0.862	15.8943	7.40449	26.6174
0.862	54.56	15.2397	0.863	38.4587	29.4762	47.1749	0.862	27.1692	10.3922	0.863	15.9421	7.46183	26.735
0.863	54.3997	15.2263	0.864	38.3955	29.4427	47.152	0.863	27.4246	10.3811	0.864	15.9909	7.52126	26.8669
0.864	54.2397	15.2119	0.865	38.3354	29.431	47.1137	0.864	27.6678	10.3693	0.865	16.0408	7.5485	26.973
0.865	54.0803	15.1966	0.866	38.2783	29.3999	47.0506	0.865	27.8985	10.3562	0.866	16.0915	7.5437	27.0812
0.866	53.9214	15.1804	0.867	38.2241	29.3225	46.9905	0.866	28.1165	10.3424	0.867	16.1428	7.57579	27.1562
0.867	53.7633	15.1632	0.868	38.1729	29.249	46.9558	0.867	28.3216	10.3287	0.868	16.1946	7.62739	27.228
0.868	53.6062	15.1457	0.869	38.1246	29.1797	46.938	0.868	28.5136	10.315	0.869	16.247	7.64807	27.2973
0.869	53.4502	15.1286	0.87	38.0791	29.1308	46.9214	0.869	28.6924	10.3013	0.87	16.2999	7.7073	27.3723
0.87	53.2954	15.1119	0.871	38.0364	29.0657	46.8792	0.87	28.8577	10.2876	0.871	16.3536	7.74013	27.4601
0.871	53.142	15.0956	0.872	37.9963	28.9855	46.8389	0.871	29.0094	10.274	0.872	16.4078	7.76579	27.5463
0.872	52.9902	15.0797	0.873	37.9586	28.9109	46.8003	0.872	29.1474	10.2605	0.873	16.4623	7.79115	27.6196
0.873	52.84	15.0642	0.874	37.9234	28.9064	46.7632	0.873	29.2714	10.2471	0.874	16.5171	7.82753	27.7086
0.874	52.6917	15.0492	0.875	37.8907	28.8999	46.7275	0.874	29.3814	10.2338	0.875	16.572	7.8453	27.7952
0.875	52.5454	15.0347	0.876	37.8603	28.8565	46.6926	0.875	29.4773	10.2206	0.876	16.6272	7.8666	27.873
0.876	52.4012	15.0206	0.877	37.8316	28.8371	46.6579	0.876	29.559	10.2075	0.877	16.6828	7.89167	27.9502
0.877	52.2593	15.007	0.878	37.8045	28.8679	46.6228	0.877	29.6264	10.1945	0.878	16.7389	7.89424	28.0256
0.878	52.1198	14.9933	0.879	37.7793	28.9026	46.588	0.878	29.6794	10.1817	0.879	16.7952	7.90671	28.0992
0.879	51.9805	14.9788	0.88	37.7562	28.9354	46.5538	0.879	29.718	10.1691	0.88	16.8516	7.9153	28.1776
0.88	51.8389	14.9636	0.881	37.735	28.9649	46.5075	0.88	29.7422	10.1566	0.881	16.9076	7.9774	28.2813
0.881	51.6953	14.9477	0.882	37.7155	28.9959	46.4476	0.881	29.7519	10.1444	0.882	16.9632	7.96382	28.3816
0.882	51.5498	14.9311	0.883	37.6976	29.0286	46.3875	0.882	29.747	10.1323	0.883	17.0181	7.96263	28.4782
0.883	51.4025	14.9138	0.884	37.6813	29.0628	46.3269	0.883	29.7277	10.1204	0.884	17.0725	8.02621	28.5713
0.884	51.2561	14.8958	0.885	37.6664	29.0771	46.3104	0.884	29.6964	10.1088	0.885	17.1263	8.02269	28.6609
0.885	51.1106	14.8779	0.886	37.6527	29.0139	46.2994	0.885	29.6555	10.0974	0.886	17.1791	8.04714	28.7649
0.886	50.9638	14.8605	0.887	37.6402	28.9541	46.2766	0.886	29.6051	10.0862	0.887	17.2311	8.06655	28.8542
0.887	50.8158	14.8438	0.888	37.6289	28.8854	46.2246	0.887	29.5452	10.0753	0.888	17.2822	8.08255	28.9354
0.888	50.6668	14.8277	0.889	37.6188	28.8202	46.1526	0.888	29.4758	10.0647	0.889	17.3328	8.03664	28.9658
0.889	50.5169	14.8124	0.89	37.6095	28.7653	46.1112	0.889	29.3971	10.0543	0.89	17.383	8.04683	28.9908
0.89	50.3662	14.7977	0.891	37.6008	28.7516	46.0932	0.89	29.3092	10.0436	0.891	17.433	8.01869	29.0927
0.891	50.2149	14.7837	0.892	37.5926	28.7379	46.0628	0.891	29.212	10.0319	0.892	17.4826	7.96898	29.2066
0.892	50.0608	14.7705	0.893	37.5842	28.7446	46.0263	0.892	29.1057	10.0193	0.893	17.5318	7.96531	29.316
0.893	49.9014	14.758	0.894	37.5754	28.7555	45.9882	0.893	28.9905	10.0057	0.894	17.5805	8.05567	29.3818
0.894	49.7395	14.7462	0.895	37.5667	28.7912	45.9491	0.894	28.8664	9.99184	0.895	17.6287	8.06951	29.4105
0.895	49.5777	14.7352	0.896	37.5585	28.822	45.9074	0.895	28.7335	9.97831	0.896	17.6762	8.0854	29.479
0.896	49.4159	14.7243	0.897	37.5507	28.821	45.8677	0.896	28.5919	9.96516	0.897	17.7228	8.10339	29.5894
0.897	49.2545	14.713	0.898	37.543	28.8431	45.8209	0.897	28.4419	9.95237	0.898	17.7683	8.1233	29.6957
0.898	49.0936	14.7011	0.899	37.5352	28.8841	45.7863	0.898	28.2835	9.93997	0.899	17.8128	8.08101	29.7979
0.899	48.9334	14.6888	0.9	37.5276	28.9272	45.7548	0.899	28.117	9.92797	0.9	17.8562	8.02413	29.8044
0.9	48.7739	14.6761	0.901	37.52	28.9725	45.7128	0.9	27.9424	9.91638	0.901	17.8986	8.05675	29.7843
0.901	48.6154	14.6629	0.902	37.512	29.0396	45.6799	0.901	27.7599	9.90522	0.902	17.9404	8.09446	29.792
0.902	48.458	14.6493	0.903	37.5036	29.0973	45.6565	0.902	27.5723	9.89448	0.903	17.9817	8.10976	29.9012
0.903	48.3019	14.6353	0.904	37.4952	29.1569	45.5955	0.903	27.3819	9.88419	0.904	18.0225	8.09237	30.0064
0.904	48.1471	14.6209	0.905	37.487	29.2186	45.541	0.904	27.1891	9.87436	0.905	18.0626	8.0779	30.1075
0.905	47.994	14.6061	0.906	37.4791	29.2511	45.5137	0.905	26.9941	9.86498	0.906	18.1021	8.15301	30.1241
0.906	47.8426	14.5916	0.907	37.4717	29.2687	45.4845	0.906	26.797	9.85608	0.907	18.1409	8.27892	30.2784
0.907	47.693	14.578	0.908	37.4651	29.289	45.449	0.907	26.598	9.84766	0.908	18.1791	8.26028	30.3117
0.908	47.5454	14.5653	0.909	37.4594	29.3122	45.3962	0.908	26.3973	9.83973	0.909	18.2164	8.21102	30.3142
0.909	47.4	14.5529	0.91	37.4545	29.3384	45.3419	0.909	26.1952	9.83229	0.91	18.253	8.17531	30.3127
0.91	47.2569	14.5402	0.911	37.4506	29.3866	45.2863	0.91	25.9918	9.82536	0.911	18.2888	8.20577	30.3021
0.911	47.1163	14.5272	0.912	37.4477	29.4742	45.2293	0.911	25.7872	9.81831	0.912	18.3237	8.24151	30.3196
0.912	46.9782	14.5139	0.913	37.4458	29.5641	45.1653	0.912	25.5818	9.81051	0.913	18.3575	8.27874	30.4115
0.913	46.8452	14.5003	0.914	37.4446	29.5724	45.0843	0.913	25.3757	9.80197	0.914	18.3901	8.27894	30.4613
0.914	46.7199	14.4864	0.915	37.4443	29.5614	45.0456	0.914	25.1691	9.79271	0.915	18.4214	8.23837	30.6577
0.915	46.6025	14.4723	0.916	37.4449	29.5603	44.956	0.915	24.9622	9.78272	0.916	18.4513	8.15864	30.9605
0.916	46.493	14.458	0.917	37.4465	29.5773	44.8651	0.916	24.7552	9.77202	0.917	18.4799	8.06831	31.0474
0.917	46.3916	14.4434	0.918	37.4487	29.5685	44.803	0.917	24.5484	9.76062	0.918	18.5069	7.97774	31.1326
0.918	46.2983	14.4287	0.919	37.4516	29.5832	44.7695	0.918	24.3418	9.74853	0.919	18.5325	7.88762	31.2735
0.919	46.2132	14.4137	0.92	37.455	29.5941	44.7314	0.919	24.1358	9.73577	0.92	18.5568	7.79839	31.2652
0.92	46.1364	14.3986	0.921	37.4586	29.6059	44.6865	0.92	23.9305	9.72233	0.921	18.5797	7.7521	31.3842
0.921	46.0681	14.3832	0.922	37.4622	29.6034	44.6725	0.921	23.7261	9.70888	0.922	18.6016	7.7553	31.3918
0.922	46.0082	14.3678	0.923	37.4661	29.5753	44.6302	0.922	23.5253	9.69605	0.923	18.623	7.75907	31.4265
0.923	45.9568	14.3522	0.924	37.4703	29.5765	44.537	0.923	23.3307	9.68386	0.924	18.644	7.70995	31.6587
0.924	45.914	14.3365	0.925	37.475	29.5815	44.5174	0.924	23.1424	9.67232	0.925	18.6644	7.61698	31.6325
0.925	45.8822	14.3206	0.926	37.4805	29.6115	44.5189	0.925	22.9607	9.66144	0.926	18.6843	7.51472	31.6099
0.926	45.8615	14.3054	0.927	37.4865	29.6422	44.5004	0.926	22.7857	9.65123	0.927	18.7037	7.4091	31.6745
0.927	45.8495	14.2913	0.928	37.4927	29.6734	44.4973	0.927	22.6177	9.6417	0.928	18.7227	7.3401	31.7358
0.928	45.8461	14.2777	0.929	37.499	29.7356	44.5328	0.928	22.4566	9.63286	0.929	18.7416	7.29735	31.9711
0.929	45.8514	14.2642	0.93	37.5055	29.8113	44.5539	0.929	22.3029	9.62472	0.93	18.7606	7.22085	32.0339
0.93	45.8654	14.2506	0.931	37.5123	29.8808	44.5305	0.93	22.1565	9.61728	0.931	18.7796	7.1685	32.0929
0.931	45.8881	14.2369	0.932	37.5199	29.8894	44.5553	0.931	22.0176	9.61057	0.932	18.7989	7.12805	32.148
0.932	45.9193	14.2233	0.933	37.5282	29.935	44.5713	0.932	21.8863	9.60457	0.933	18.8186	7.06319	32.1516
0.933	45.9592	14.2097	0.934	37.5374	29.9755	44.5566	0.933	21.7629	9.5993	0.934	18.8386	7.00219	32.2532
0.934	46.0077	14.1961	0.935	37.5476	29.9954	44.4722	0.934	21.6473	9.59476	0.935	18.8588	6.94576	32.3825
0.935	46.0646	14.1825	0.936	37.5588	30.0124	44.4335	0.935	21.5398	9.59095	0.936	18.879	6.91856	32.4942
0.936	46.1301	14.169	0.937	37.5707	30.0102	44.4083	0.936	21.4404	9.58789	0.937	18.8991	6.89276	32.7059
0.937	46.2039	14.1555	0.938	37.5833	29.9989	44.4609	0.937	21.3492	9.58557	0.938	18.9192	6.88068	33.0255
0.938	46.2861	14.1421	0.939	37.5962	30.0192	44.4279	0.938	21.2663	9.58336	0.939	18.9394	6.86876	33.1867
0.939	46.3765	14.1288	0.94	37.6091	30.024	44.3694	0.939	21.1918	9.58064	0.94	18.9598	6.84275	33.3871
0.94	46.475	14.1155	0.941	37.6221	29.9672	44.3437	0.94	21.1257	9.5774	0.941	18.9804	6.83835	33.4381
0.941	46.5817	14.1024	0.942	37.6353	29.9738	44.3415	0.941	21.0682	9.57365	0.942	19.0013	6.84959	33.4789
0.942	46.6938	14.0895	0.943	37.6487	29.9986	44.3168	0.942	21.0193	9.5694	0.943	19.0223	6.88894	33.526
0.943	46.809	14.076	0.944	37.6621	29.9886	44.2865	0.943	20.979	9.56464	0.944	19.0431	6.90227	33.581
0.944	46.927	14.0614	0.945	37.6757	30.0525	44.215	0.944	20.9473	9.55938	0.945	19.0636	6.91758	33.7912
0.945	47.0478	14.0457	0.946	37.69	30.0994	44.2902	0.945	20.9244	9.55363	0.946	19.0838	6.87701	33.9945
0.946	47.1712	14.0289	0.947	37.7055	30.1193	44.341	0.946	20.9102	9.5474	0.947	19.1038	6.87143	34.1909
0.947	47.2971	14.0111	0.948	37.7223	30.1257	44.3613	0.947	20.9047	9.54068	0.948	19.1236	6.88867	34.38
0.948	47.4254	13.9922	0.949	37.7403	30.1425	44.3755	0.948	20.908	9.53348	0.949	19.143	6.938	34.5097
0.949	47.556	13.9722	0.95	37.7587	30.1587	44.427	0.949	20.9199	9.52582	0.95	19.162	6.99252	34.6174
0.95	47.6888	13.9519	0.951	37.7773	30.2209	44.4766	0.95	20.9407	9.51833	0.951	19.1803	7.02744	34.7189
0.951	47.8211	13.9319	0.952	37.7957	30.2892	44.5099	0.951	20.9701	9.51166	0.952	19.1979	7.03803	34.7784
0.952	47.9505	13.9121	0.953	37.8138	30.392	44.5729	0.952	21.0082	9.50579	0.953	19.2147	7.0171	34.9941
0.953	48.0768	13.8927	0.954	37.8318	30.4237	44.6586	0.953	21.055	9.50076	0.954	19.2304	7.04425	35.134
0.954	48.1998	13.8736	0.955	37.8495	30.4078	44.7397	0.954	21.1103	9.49655	0.955	19.245	7.13368	35.1948
0.955	48.3195	13.8548	0.956	37.8666	30.3931	44.7727	0.955	21.1742	9.49317	0.956	19.2585	7.25186	35.2252
0.956	48.4333	13.8364	0.957	37.8834	30.3924	44.8626	0.956	21.2465	9.49063	0.957	19.2709	7.32634	35.2527
0.957	48.5387	13.8184	0.958	37.9001	30.4057	44.9377	0.957	21.3273	9.48892	0.958	19.2823	7.40169	35.3897
0.958	48.6355	13.8007	0.959	37.9168	30.3996	45.0099	0.958	21.4164	9.48806	0.959	19.293	7.4447	35.5208
0.959	48.7237	13.7835	0.96	37.9332	30.395	45.0661	0.959	21.5137	9.48804	0.96	19.3028	7.48922	35.6458
0.96	48.8031	13.7668	0.961	37.9498	30.4023	45.0983	0.96	21.6192	9.48822	0.961	19.3121	7.54133	35.7647
0.961	48.8738	13.7505	0.962	37.9667	30.4538	45.1203	0.961	21.7327	9.48798	0.962	19.3208	7.59127	35.8774
0.962	48.9356	13.734	0.963	37.9842	30.4267	45.1781	0.962	21.8542	9.48732	0.963	19.3293	7.69102	35.9047
0.963	48.9885	13.7167	0.964	38.0025	30.413	45.239	0.963	21.9834	9.48623	0.964	19.3378	7.76445	35.8118
0.964	49.0324	13.6987	0.965	38.0213	30.4022	45.2972	0.964	22.1204	9.48473	0.965	19.3463	7.81701	35.716
0.965	49.0673	13.6799	0.966	38.0404	30.4333	45.3332	0.965	22.2649	9.4828	0.966	19.3546	7.93254	35.633
0.966	49.0932	13.6604	0.967	38.0603	30.4606	45.3926	0.966	22.4168	9.48046	0.967	19.3623	7.94671	35.6285
0.967	49.1099	13.6402	0.968	38.0809	30.5056	45.4194	0.967	22.576	9.47769	0.968	19.3694	8.01997	35.7313
0.968	49.1176	13.6194	0.969	38.1022	30.5297	45.4148	0.968	22.7423	9.47452	0.969	19.3761	8.08986	35.8272
0.969	49.1186	13.5984	0.97	38.1247	30.5014	45.4275	0.969	22.9155	9.47094	0.97	19.3824	8.11848	35.9165
0.97	49.1153	13.5781	0.971	38.1489	30.5578	45.4193	0.97	23.0956	9.46694	0.971	19.3883	8.12892	35.9984
0.971	49.1078	13.5584	0.972	38.1748	30.6005	45.4317	0.971	23.2822	9.46255	0.972	19.3939	8.16361	35.9363
0.972	49.0961	13.5394	0.973	38.2019	30.6189	45.4321	0.972	23.4752	9.45776	0.973	19.3993	8.18642	35.914
0.973	49.0802	13.5211	0.974	38.23	30.6415	45.4812	0.973	23.6745	9.45257	0.974	19.4045	8.2148	35.9379
0.974	49.06	13.5034	0.975	38.2588	30.6658	45.5255	0.974	23.8798	9.44763	0.975	19.4094	8.29709	35.9549
0.975	49.0357	13.4865	0.976	38.2881	30.7413	45.5838	0.975	24.0909	9.44357	0.976	19.4142	8.38152	35.9648
0.976	49.0072	13.4696	0.977	38.318	30.8272	45.6343	0.976	24.3077	9.44039	0.977	19.4185	8.44587	35.9677
0.977	48.9746	13.4522	0.978	38.349	30.8442	45.7024	0.977	24.5298	9.4381	0.978	19.4221	8.49164	35.9568
0.978	48.9378	13.4343	0.979	38.3811	30.9019	45.7753	0.978	24.7548	9.43669	0.979	19.4248	8.58052	35.8476
0.979	48.897	13.416	0.98	38.414	30.9769	45.8249	0.979	24.9798	9.43618	0.98	19.4266	8.62679	35.6861
0.98	48.8522	13.3971	0.981	38.4478	30.9897	45.8366	0.98	25.2048	9.43656	0.981	19.4274	8.67469	35.4934
0.981	48.8034	13.3778	0.982	38.4821	31.0521	45.8367	0.981	25.4294	9.43783	0.982	19.4273	8.73116	35.3596
0.982	48.7506	13.3581	0.983	38.5173	31.0182	45.7976	0.982	25.6535	9.43999	0.983	19.4263	8.80343	35.2414
0.983	48.694	13.338	0.984	38.5534	31.0061	45.7608	0.983	25.8744	9.44304	0.984	19.4242	8.86652	35.14
0.984	48.6336	13.3175	0.985	38.59	31.0221	45.769	0.984	26.0895	9.44697	0.985	19.4206	8.92928	35.056
0.985	48.5693	13.2966	0.986	38.6269	31.03	45.814	0.985	26.2985	9.45178	0.986	19.4155	8.99148	34.9841
0.986	48.5014	13.2753	0.987	38.6642	31.0609	45.8265	0.986	26.5013	9.45747	0.987	19.4085	9.05278	34.9153
0.987	48.4298	13.2537	0.988	38.702	31.1063	45.8943	0.987	26.6952	9.4634	0.988	19.3998	9.08203	34.8531
0.988	48.3547	13.2318	0.989	38.7401	31.1533	46.0223	0.988	26.8776	9.46892	0.989	19.3895	9.13594	34.7842
0.989	48.276	13.2096	0.99	38.7786	31.2207	46.1484	0.989	27.0483	9.47405	0.99	19.3775	9.16419	34.7086
0.99	48.194	13.1872	0.991	38.8176	31.323	46.1977	0.99	27.2072	9.47876	0.991	19.3644	9.10613	34.6266
0.991	48.1086	13.1645	0.992	38.857	31.3898	46.2025	0.991	27.354	9.48306	0.992	19.3502	9.09613	34.5385
0.992	48.0199	13.1415	0.993	38.8967	31.4388	46.1891	0.992	27.4887	9.48694	0.993	19.3349	9.12437	34.4574
0.993	47.9257	13.1184	0.994	38.9363	31.4801	46.2015	0.993	27.6112	9.4904	0.994	19.3183	9.14334	34.4167
0.994	47.8235	13.0951	0.995	38.9756	31.5373	46.2405	0.994	27.7212	9.49343	0.995	19.3004	9.12313	34.3707
0.995	47.7135	13.0723	0.996	39.0143	31.5647	46.2761	0.995	27.8188	9.49603	0.996	19.281	9.08667	34.2353
0.996	47.5957	13.05	0.997	39.0524	31.5464	46.2927	0.996	27.9037	9.4982	0.997	19.2601	9.08872	34.0854
[truncated: 4 more rows]
