# Supplementary material for: Integration of locomotion and auditory signals in the mouse inferior colliculus
Source: eLife. 2020 Jan 28;9:e52228. doi: 10.7554/eLife.52228 (PMC7004561; doi:10.7554/eLife.52228)
Supplement: Figure 3—source data 1. [file elife-52228-fig3-data1.xlsx]

## Sheet: Sheet1
Figure 3A																			Figure 3B
Normal									Hearing imparied										Normal
time(sec)	Firing rate(Hz)								time(sec)	Firing rate(Hz)									rate	level
	20dB	30dB	40dB	50dB	60dB	70dB	80dB	90dB		20dB	30dB	40dB	50dB	60dB	70dB	80dB	90dB		20	21.9582	40.6168	33.6562	56.0009	62.9604	-3.6191	26.2313	23.0251	30.5789	7.0825	52.9708	47.3998	42.6161	38.0461	15.7913	48.7537	22.2635	39.8168	19.5526	23.7887
-0.1995	17.1767	27.0833	16.0715	32.498	7.54902	24.3979	12.6676	0.928955	-0.1995	18.9132	20.6664	39.162	14.7965	36.6257	27.1143	31.7892	19.6757		30	11.2062	265.45	70.8101	174.728	354.437	48.093	35.8237	91.7357	384.958	109.174	94.157	76.8001	63.3096	300.344	17.0282	127.018	162.785	284.275	30.9019	22.8844
-0.1985	24.4138	35.144	21.337	30.2974	8.02652	28.6877	19.9145	2.3064	-0.1985	21.023	32.7323	45.6014	19.5089	44.6102	40.2681	40.3489	25.5046		40	72.9791	433.73	195.915	364.454	483.878	53.9629	115.077	194.295	636.991	202.539	350.225	102.209	131.07	506.624	2.7786	125.449	221.053	602.495	73.2734	7.2069
-0.1975	30.28	38.2553	25.7053	22.7405	8.06583	30.0236	28.3247	4.61943	-0.1975	20.9649	43.9622	46.9697	21.7417	49.7084	50.9201	45.8087	30.2033		50	77.6886	409.402	282.324	459.264	490.253	55.5237	269.898	271.026	641.577	248.196	575.918	135.016	193.421	527.156	17.3246	165.773	228.517	548.336	69.2604	31.4504
-0.1965	34.0147	35.7431	29.3951	15.112	8.02652	28.564	37.0881	7.6866	-0.1965	21.8716	51.0656	44.3916	21.0395	51.9319	54.8252	47.6134	34.3796		60	200.124	450.32	394.039	566.696	455.86	186.306	316.423	319.886	628.465	281.471	617.802	163.859	204.504	458.276	25.7187	125.886	287.622	672.595	50.0653	38.159
-0.1955	35.7747	30.2437	32.9876	12.1852	7.54902	25.0862	44.2084	11.0694	-0.1955	26.3118	52.6659	39.9288	18.4091	50.625	51.1397	45.819	38.5374		70	229.066	360.1	499.359	489.664	521.486	892.457	323.062	399.591	579.785	266.514	561.246	146.986	404.156	483.662	18.1182	115.347	234.03	626.839	64.9361	58.3404
-0.1945	35.7878	25.4415	36.3197	15.7007	6.16	21.2505	46.9399	14.3736	-0.1945	33.4722	50.0996	35.5692	16.0417	45.2281	43.2508	41.3021	42.1337		80	338.38	260.39	582.505	549.488	544.166	989.306	293.035	460.786	522.41	315.127	484.635	159.11	657.217	411.522	33.2784	104.134	176.066	559.21	53.6964	67.2614
-0.1935	33.817	23.1516	38.3286	24.3244	4.10901	18.9775	44.0426	17.2528	-0.1935	40.1615	46.2322	32.2557	16.411	36.9085	35.694	36.2754	44.2779		90	789.432	293.066	734.663	560.081	563.497	910.045	287.348	477.016	472.415	290.924	567.153	170.066	566.329	341.432	58.4875	138.376	170.224	509.594	68.3873	104.857
-0.1925	29.753	22.4476	38.1659	34.9244	2.18999	18.7909	37.4615	19.4154	-0.1925	44.2208	43.2763	29.6052	20.5958	28.6182	30.7578	33.3943	44.7582
-0.1915	24.3825	21.0763	36.0131	44.241	0.992737	19.1828	31.5777	20.9925	-0.1915	45.916	41.446	27.1865	27.1563	23.5475	28.1023	33.5862	43.8193		Hearing impaired 1
-0.1905	19.0221	17.5841	32.6473	50.1028	0.674928	18.0845	30.8795	22.3353	-0.1905	46.2604	39.369	25.795	33.1832	23.7185	26.459	35.2952	41.7443		rate	level
-0.1895	14.6766	12.4489	28.8385	51.7355	1.35652	15.0002	37.2112	23.0066	-0.1895	45.563	35.7101	26.8488	36.8119	29.4778	24.979	36.6033	39.3356		20	19.0685	27.4533	31.8193	16.0821	17.8767	1.8659	61.0707	70.9194	51.6877	19.8725	53.3013	43.304	46.3557	45.601	24.0881	32.8882	51.4743	24.1011	34.1684	23.1699	51.1261	33.0174	69.6975	45.9744	34.141	31.2163	37.9003	44.8422	23.5871	25.9348
-0.1885	11.9805	7.47869	25.4984	49.769	3.45363	11.5855	47.8017	21.9151	-0.1885	44.0232	30.8248	30.7422	38.5042	39.5724	23.4958	37.9149	37.9079		30	60.2432	12.3124	10.6424	36.8717	9.6653	23.2164	28.1806	29.1578	24.6194	26.7732	36.2719	3.6426	65.2917	39.4128	28.9012	19.6072	44.9936	37.1879	35.5237	32.7103	39.1164	32.5499	39.5526	10.8352	38.7977	13.2448	23.1115	4.6123	-0.6456	6.8882
-0.1875	11.3482	4.36804	23.6427	46.025	7.45969	10.1433	56.4649	19.3502	-0.1875	42.5847	26.9486	36.2864	39.883	51.5819	22.0758	41.7276	38.249		40	27.532	21.1816	36.1762	43.1988	25.0537	27.3361	12.5866	22.0883	38.4062	16.4684	30.5381	37.8237	52.5311	50.7741	6.4851	22.4265	39.4512	37.367	20.1457	27.2832	45.0071	59.4468	62.754	36.8794	58.7238	24.4256	48.4563	62.8076	10.3142	23.2513
-0.1865	12.3997	3.86664	23.2742	42.6803	13.2559	11.7737	58.468	18.019	-0.1865	42.6439	26.1573	41.7024	41.7696	62.5458	20.6909	49.5113	40.1357		50	33.8317	24.4556	46.2997	41.3242	32.0955	44.8551	34.5568	46.295	20.1226	21.246	37.388	-1.8415	40.4278	34.0627	18.4303	42.305	43.9746	41.663	16.1954	-0.3461	42.9281	13.3963	36.4152	7.1458	40.0698	22.6455	53.0971	25.0872	29.763	17.7483
-0.1855	13.5288	5.89985	22.6981	41.414	19.6375	15.8926	54.5839	20.959	-0.1855	45.0791	27.9968	45.7023	43.5972	69.7229	19.8114	59.3287	42.5918		60	59.4778	35.7851	40.5337	41.3389	37.373	34.677	28.8361	22.1397	49.818	30.1852	44.9443	33.6024	48.1661	70.0016	38.152	13.4034	27.3644	20.3246	28.7657	24.1923	31.0057	61.7352	69.5208	29.775	44.8757	28.9806	45.8366	18.6845	34.9156	16.0043
-0.1845	12.9971	9.93813	20.0358	42.851	24.7242	20.8659	49.7894	28.4107	-0.1845	49.3451	29.8531	47.551	44.3931	71.6055	21.3028	67.0684	43.8962		70	19.7329	23.3829	21.3659	36.6783	29.2233	22.4966	38.1076	11.7291	29.7206	10.4059	12.8777	22.9073	30.6702	40.1637	23.4067	13.9883	29.3897	140.262	97.968	15.5978	56.887	55.3597	41.1175	36.5632	134.663	44.2807	39.5238	29.9186	28.3435	14.3005
-0.1835	10.7122	15.1359	15.5253	45.8456	27.0372	24.6794	48.3185	37.0462	-0.1835	53.1615	29.8417	46.906	43.8108	68.4896	27.859	69.8577	42.0814		80	32.988	19.1569	43.568	36.6563	44.9062	47.8941	51.0143	50.4154	39.4337	15.9704	93.0358	222.81	30.583	26.0903	67.0022	66.0025	68.6173	274.401	251.047	7.0307	33.4718	54.1165	139.843	81.917	192.413	102.671	15.327	40.6673	70.7413	55.5866
-0.1825	8.70088	20.3343	11.5878	47.5895	26.3907	25.6588	50.3395	42.2256	-0.1825	53.7419	28.7062	44.3836	42.2605	61.8315	40.4765	67.6116	36.5669		90	26.1975	25.2004	32.9587	24.6139	7.5358	12.4226	16.7276	45.748	44.234	30.8837	275.654	446.836	57.7123	107.311	200.239	151.85	242.782	376.716	216.994	51.297	24.1779	77.4876	168.509	181.032	367.434	305.7	38.2436	25.3386	126.687	50.1838
-0.1815	9.91549	24.2825	10.5328	45.5453	24.0019	23.4675	52.5786	41.2514	-0.1815	50.4169	28.7942	41.7516	40.647	53.2516	55.8992	61.5555	29.163
-0.1805	16.6501	26.5513	12.5836	39.5539	21.624	19.4912	51.2972	35.1768	-0.1805	45.9957	31.9264	40.7216	40.0046	44.3484	67.388	52.9459	22.8955		Hearing impaired 2
-0.1795	29.3265	28.384	16.049	31.8034	20.1691	15.8835	45.1161	27.7621	-0.1795	44.5989	38.0374	41.8899	40.4219	36.7161	69.6724	43.6998	19.7523		rate	level
-0.1785	45.6123	31.6156	18.9906	24.9078	19.2027	14.2781	36.1266	22.3854	-0.1785	47.9531	44.7435	45.2142	40.2052	31.3252	63.5377	36.5042	19.6516		20	21.7213	39.1208	15.804	32.7001	37.254	30.5018	8.335	18.1405	11.2151	11.7626	37.0954	42.8973	15.1237	25.2555	43.8396	35.2819	38.3064	22.0931	33.4907	23.86	27.873	22.0355	-3.4451	8.0586	21.5953	42.6591	58.153	22.9367	26.7431	44.0145
-0.1775	60.4308	36.0297	20.5716	20.2241	18.0272	15.4364	28.8574	19.7687	-0.1775	53.9932	48.3013	50.5957	37.5039	28.0854	55.3108	33.0584	21.5372		30	28.5194	38.7309	10.771	11.0126	31.135	29.9491	10.8008	26.6068	40.9679	22.048	27.2092	72.8374	20.9508	26.4491	37.8293	34.2544	38.2993	18.0306	20.5215	26.4788	29.4697	8.574	19.6701	9.8674	42.4909	52.3459	34.7192	38.1508	19.8837	39.4147
-0.1765	67.9592	38.7392	21.2	17.6318	16.7841	19.6459	27.7319	18.5087	-0.1765	58.7312	46.3999	57.3044	33.1286	26.5637	52.178	32.9256	24.8957		40	29.2471	5.2739	33.9955	33.3738	47.3012	20.8479	13.8227	13.3942	8.5642	21.242	14.4218	29.3796	4.894	29.8389	25.7774	25.68	7.4439	20.935	20.0196	8.8179	29.5342	16.6281	23.0475	25.9147	25.6631	65.0698	44.5797	34.4788	19.217	15.3627
-0.1755	65.1956	37.061	22.147	16.4127	16.0805	26.711	34.2753	17.4357	-0.1755	59.3306	40.7894	63.3924	30.328	26.8913	57.1946	34.6022	29.4626		50	23.6568	15.3012	20.4846	47.6278	27.4238	35.0341	25.736	28.8763	13.8952	47.4748	37.5157	26.2979	31.6266	33.2334	37.7009	45.2798	20.3244	23.9272	31.5677	33.2623	15.1477	8.1488	18.745	11.1369	32.7372	65.9711	33.9451	38.2388	42.1384	26.1205
-0.1745	54.2073	31.3379	25.0362	16.1443	16.0959	35.4182	45.3842	17.2703	-0.1745	56.0315	36.6704	66.5495	31.303	29.5707	67.1063	36.8858	33.7689		60	28.321	17.0661	24.7225	37.9302	57.9297	42.8194	27.1406	28.2338	13.6437	26.8899	15.6918	24.2202	5.0971	26.8502	11.8629	10.0171	18.68	14.699	37.8162	47.0932	25.8557	12.9257	17.0725	12.7504	14.3255	37.977	33.9373	22.3195	13.4398	15.201
-0.1735	40.6193	24.3824	30.6265	16.7247	16.5965	43.6457	54.1479	19.7924	-0.1735	51.8165	38.6372	65.55	35.022	34.4512	75.044	38.8835	35.5449		70	9.2764	17.0803	5.3713	35.8305	90.6689	36.1968	28.9653	36.1402	27.2527	55.9329	26.8865	34.7036	9.8334	29.4145	35.423	21.7359	-1.9683	49.2764	10.023	31.7181	11.7261	31.6057	22.0569	29.3415	26.3125	43.2799	26.1859	61.0303	25.0764	33.9566
-0.1725	29.783	18.9693	37.5239	17.7373	17.5405	49.4333	54.3398	25.1855	-0.1725	50.1047	46.4906	60.6699	38.6327	39.9127	76.3956	40.0108	34.3131		80	17.8244	33.9765	16.7448	37.4278	20.7723	15.1212	5.3401	19.2422	21.6388	56.9461	37.8866	51.7745	19.5341	34.7149	50.5356	48.3167	18.8608	41.2517	24.4903	34.485	20.803	23.9259	65.2441	169.375	15.4281	42.2774	25.795	31.6008	53.4438	49.8747
-0.1715	24.2893	16.3604	42.7347	18.3051	19.2868	51.8289	45.8319	30.6708	-0.1715	52.1433	54.9434	53.2592	40.1151	42.9557	72.0675	40.8901	32.417		90	9.485	61.853	21.0519	46.0108	49.846	68.6009	29.4689	55.6962	-3.1213	49.7557	13.3688	37.6111	58.7905	171.905	348.86	374.898	12.2982	109.146	26.4682	28.2115	65.2492	243.677	477.241	484.94	44.0459	88.0128	63.2449	85.7181	164.29	164.504
-0.1705	24.0372	16.2639	43.9586	18.025	22.1823	50.7557	35.1561	32.6266	-0.1705	56.2642	58.1197	45.2301	39.3501	40.9908	66.0861	43.5083	32.4339
-0.1695	27.0922	17.2652	41.3152	17.6649	25.8761	46.6361	29.8981	30.2703	-0.1695	59.6582	54.6028	38.442	37.6208	34.5437	61.1391	49.4988	34.4359
-0.1685	30.2734	17.6479	37.2302	18.4262	28.9306	40.8504	32.6384	26.6251	-0.1685	60.8338	47.6543	34.0936	36.5582	27.7019	56.8771	58.1857	36.7499		Figure 3E							Figure 3F
-0.1675	30.4606	16.5174	34.9385	20.6481	29.3399	36.1627	39.6885	25.5623	-0.1675	60.1739	41.028	32.488	36.7811	24.7466	51.4973	66.5475	38.5377		Increased		decreased		no change
-0.1665	26.6666	14.401	36.3832	23.3784	25.9857	35.1375	44.6518	28.1885	-0.1665	58.4372	35.8772	33.0937	37.001	26.5192	44.2905	71.3086	40.2787		stationary	walking	stationary	walking	stationary	walking		x	N(increased)	N(decreased)	N(no change)
-0.1655	20.5416	12.8993	40.7927	24.9894	19.9531	37.3583	43.6218	32.1075	-0.1655	55.4246	31.7114	34.5864	35.1799	30.4594	36.7613	71.2184	41.9856		9.2874	12.5721	7.9708	5.9405	2.5931	2.1649		-1	0	0	0
-0.1645	14.5846	13.5774	45.2426	24.447	14.1885	39.2864	37.7732	33.7333	-0.1645	50.3536	28.8137	35.2086	30.9706	33.6153	31.3888	67.6087	42.4128		26.9507	30.9212	18.7468	13.8848	8.2344	7.8643		-0.9	0	0	0
-0.1635	10.5799	16.4606	46.8124	22.5958	11.4942	37.812	31.037	31.2267	-0.1635	43.1613	28.3124	34.0247	26.1963	35.0078	29.4398	62.8954	40.4924		24.1416	26.6395	12.5291	11.1363	1.1432	1.0848		-0.8	0	0	0
-0.1625	9.8225	19.3899	44.4232	22.2871	12.6744	33.4588	25.9229	25.8429	-0.1625	34.9557	30.226	32.1565	22.6671	35.5843	30.2574	58.4611	36.6734		20.2744	23.6244	5.601	2.605	5.7574	7.1932		-0.7	0	0	0
-0.1615	13.4637	19.5635	39.0347	26.2941	16.3782	29.6633	22.479	21.0168	-0.1615	27.2914	32.9363	32.2383	20.5243	36.773	32.4763	54.034	32.594		13.4483	20.5342	8.6043	5.2575	22.2822	19.7676		-0.6	0	0	0
-0.1605	21.4584	16.2107	32.5095	34.1767	20.2972	29.4289	20.3139	19.8936	-0.1605	21.547	35.1259	36.2212	18.9257	39.2445	35.4035	49.0132	30.108		15.5114	22.1408	19.5758	17.5545	16.6043	14.9786		-0.5	0	0	0
-0.1595	31.2223	11.4333	26.4384	41.5766	22.6188	32.8274	19.828	23.0889	-0.1595	18.6881	37.3024	43.504	17.2888	42.5233	39.0526	43.7254	30.5292		1.2882	6.166	14.9592	9.2778	38.59	39.3213		-0.4	0	0	0
-0.1585	38.33	8.29473	21.9602	43.7832	22.992	37.0717	21.4137	28.5812	-0.1585	18.7515	40.9984	50.9125	15.5744	45.6443	43.295	39.0855	33.7677		6.0969	18.0909			22.0679	20.7524		-0.3	0	0	0
-0.1575	39.7058	8.37187	20.4096	40.0688	22.4937	38.8025	24.712	33.9218	-0.1575	20.7316	47.0986	54.4581	14.2793	48.431	47.5372	35.5893	38.0105		9.0392	12.6162			41.1706	41.7167		-0.2	0	3	0
-0.1565	36.2712	10.9272	23.303	33.6893	22.6266	36.8265	29.1862	38.3206	-0.1565	23.4992	54.7084	51.8727	14.5924	51.7121	51.0875	32.9571	41.1488		10.8629	21.1029			5.4441	4.4625		-0.1	0	4	6
-0.1555	31.6302	13.8881	30.8372	28.064	24.2832	32.9587	34.5844	42.2159	-0.1555	26.3199	60.7908	44.2791	17.7591	55.6573	52.9888	30.61	42.8356		25.6151	28.7507			6.1316	6.3415		0	0	0	5
-0.1545	28.2186	15.6953	40.4048	24.3486	27.5942	30.2452	40.2272	45.2794	-0.1545	28.2798	61.6059	35.3466	23.5002	58.5727	51.4407	28.7088	44.5506		33.2023	37.6449						0.1	4	0	0
-0.1535	25.8746	16.4673	47.5962	22.4666	32.2074	30.3573	44.5009	45.8426	-0.1535	28.4644	55.9761	28.7161	29.5308	58.5605	44.9419	28.7583	47.6796		2.3743	17.6736						0.2	4	0	0
-0.1525	23.901	17.3157	49.5403	22.5708	37.3611	32.4044	45.9802	42.5892	-0.1525	27.4185	46.9001	26.4121	33.8069	55.8942	34.9549	32.3241	52.2247		10.3327	18.3114						0.3	2	0	0
-0.1515	22.5536	18.7986	46.8245	24.6365	41.9827	33.7042	44.8633	36.125	-0.1515	27.3511	39.0488	29.0045	37.2242	52.3703	26.1297	38.7844	57.2289		10.1888	30.8487						0.4	2	0	0
-0.1505	21.9059	20.5733	41.5397	27.67	44.9508	31.7158	42.5796	28.4915	-0.1505	29.9709	35.1157	35.6595	42.9767	48.7575	22.5592	45.0542	61.6689		11	48.5484						0.5	2	0	0
-0.1495	20.864	22.3355	34.7081	30.2278	45.1937	25.952	39.9981	21.5962	-0.1495	34.7797	35.148	43.7875	52.896	44.3259	24.256	48.0291	64.7673									0.6	0	0	0
-0.1485	18.474	24.3209	26.7992	31.4507	42.0812	18.5816	36.7588	16.5242	-0.1485	40.1919	38.3412	50.1816	65.3998	38.7859	28.0847	47.2255	65.7999									0.7	1	0	0
-0.1475	15.5724	26.7905	19.2898	31.4198	36.4986	13.0451	32.4357	13.8649	-0.1475	45.379	44.0436	53.236	77.4645	33.2496	31.8303	44.9221	64.0869									0.8	1	0	0
-0.1465	14.2142	29.3167	13.9656	31.0878	30.9467	11.7371	27.4694	13.7955	-0.1465	49.9179	51.1434	53.4635	87.226	28.9761	36.2307	43.7661	59.8869									0.9	0	0	0
-0.1455	15.419	30.6733	11.4697	32.0559	27.6481	14.608	22.6211	15.5855	-0.1455	52.7754	57.7189	51.8845	93.5315	26.0675	42.6019	44.2504	55.2563									1	0	0	0
-0.1445	17.8449	29.649	11.7592	35.6331	27.0116	19.4574	18.4229	17.8454	-0.1445	53.1327	62.0143	49.1233	94.3396	23.9229	49.6193	44.5066	52.8682
-0.1435	18.9132	26.2096	15.0992	41.286	28.28	23.4228	15.7597	20.0158	-0.1435	51.2983	63.3278	46.1784	87.8341	22.5662	53.7528	42.5729	53.2486		Figure 3 - figure supplement 1B						Figure 3 - figure supplement 1C
-0.1425	17.2271	21.7492	21.221	46.3417	30.4457	24.5977	16.0774	23.1697	-0.1425	47.8551	61.7496	44.2919	75.0048	22.8473	52.4748	38.6396	54.1787		Left: MI for the increased			Right: MI for the decreased			Latency (msec)
-0.1415	13.8927	18.2295	27.9168	47.8974	31.9306	22.7627	20.0071	28.7986	-0.1415	43.3288	57.8353	43.1433	59.6555	25.2006	45.8994	34.6784	53.4527		Normal	Hearing imparied		Normal	Hearing imparied		Normal	Hearing imparied
-0.1405	11.4994	17.22	32.0162	45.0905	31.0251	18.9323	26.118	36.8873	-0.1405	39.2721	52.7841	40.6923	45.9329	28.64	35.887	32.0523	51.2961		0.8571	0.1503		-0.2588	-0.1459		61	-130
-0.1395	11.7847	19.3225	32.2067	39.6233	28.0572	14.4916	31.9804	45.0038	-0.1395	37.8119	47.9935	36.0939	36.368	31.1753	25.1381	30.3	49.4569		0.0933	0.0686		-0.8414	-0.149		147	-98
-0.1385	14.2081	23.7893	29.992	34.6659	26.0781	10.8817	36.4955	48.9937	-0.1385	39.3485	44.0584	31.7325	31.6153	30.9771	16.8274	28.3086	48.7395		0.1625	0.0492		-0.4054	-0.0589		-65	82
-0.1375	16.8113	28.6522	27.6014	33.2389	27.754	9.73284	40.4119	45.5435	-0.1375	42.072	40.776	30.976	31.0542	27.5738	13.5591	25.7519	48.099		0.199	0.0763		-0.0654	-0.3651		-111	23
-0.1365	18.3101	31.7437	25.9598	36.6026	31.9523	12.4978	44.5606	35.273	-0.1365	44.0147	38.086	34.1537	33.5388	22.5919	16.0855	23.1471	45.8643		0.6806	0.2085		-0.3269	-0.2344		-185	-52
-0.1355	18.8877	32.0127	25.1992	43.4001	34.7276	19.4277	48.663	22.983	-0.1355	44.5507	36.421	37.8169	37.8021	19.0956	22.9895	21.2827	41.6485		0.3174	0.1761		-0.0677	-0.2414		-23	67
-0.1345	19.0288	30.0542	26.0514	50.4561	33.739	28.9826	52.0743	14.1824	-0.1345	43.8782	36.1165	38.14	42.3886	19.4335	31.3385	20.8746	37.1485		0.045	0.6544		-0.2562	-0.0544		-120	-63
-0.1335	18.5265	27.5226	29.6073	54.7766	30.3979	38.6924	54.4074	11.4565	-0.1335	41.9128	36.7462	34.5573	45.7628	23.5952	37.9492	22.3368	34.8263		0.3497	0.4959		-0.0285			-221	-56
-0.1325	17.0872	26.142	35.7069	54.8562	27.2031	46.7755	54.8377	13.7731	-0.1325	38.1535	37.0448	30.0057	47.1837	29.5978	40.9406	25.7672	35.6658		0.3879	0.1652		-0.5612			-115	-121
-0.1315	15.3893	27.1345	42.0512	50.5023	24.4262	52.627	52.0287	18.1448	-0.1315	32.8898	35.6887	28.0803	47.3688	34.831	40.4275	31.3846	38.7432		0.0438	0.3203		-0.0238			-66	-96
-0.1305	15.1609	30.8113	45.1365	42.6212	20.7185	55.7305	46.0433	21.815	-0.1305	28.4695	32.5241	30.1411	47.5223	36.9468	37.5359	39.618	43.0678		0.5051	0.0577		-0.2724			127	-307
-0.1295	17.9808	35.9727	42.4214	33.4868	16.1677	55.0151	39.7209	23.7409	-0.1295	28.3714	28.9244	34.7702	47.7198	34.8184	33.2307	49.7945	48.8667		0.845	0.0627		-0.174			-53	-198
-0.1285	23.535	39.8787	34.4788	25.8518	13.3048	50.3424	36.5239	24.5017	-0.1285	34.0499	26.7877	39.7637	46.792	29.7779	28.4319	58.8307	56.3916		0.1715	0.7631		-0.4004			-102	-81
-0.1275	29.1759	39.8771	25.5448	20.9934	15.0339	44.4403	36.8595	24.924	-0.1275	42.931	27.42	44.5032	43.6373	25.2501	24.5642	62.8245	64.0715		0.5297	0.2785		-0.4212			-158	-98
-0.1265	31.9442	35.9775	21.7334	18.3759	21.9318	41.7848	38.045	25.1746	-0.1265	50.3465	31.157	49.7121	38.2675	24.1825	23.1786	60.7957	68.6718		0.7545	0.5034		-0.2702			81
-0.1255	31.192	31.5008	27.5909	17.2138	31.1149	44.377	38.3174	25.2755	-0.1255	53.5812	37.1223	54.781	32.0349	27.1172	24.9716	55.9017	67.2654		0.1655	0.6306		-0.7419			-134
-0.1245	28.8497	30.1209	42.4803	17.2742	37.6808	49.1538	39.0559	25.7104	-0.1245	53.6222	43.3339	56.7132	27.2977	32.7703	29.1131	52.3395	59.1806		0.3647			-0.2126			-95
-0.1235	27.5319	32.0891	59.1482	18.1505	38.4258	50.8252	41.805	26.898	-0.1235	53.2095	47.9195	53.1111	26.5004	39.1629	33.4082	51.6169	46.865		0.8357			-0.1091			3
-0.1225	28.6929	34.1377	67.5924	19.0123	34.9256	47.3362	44.8045	28.4151	-0.1225	53.798	50.3743	45.6465	30.9518	43.7182	35.5146	52.0301	35.2286		0.2212			-0.0672			-145
-0.1215	31.7039	33.3902	62.9741	19.4853	32.179	41.7196	44.6665	29.3652	-0.1215	54.4436	51.1589	38.8359	40.253	43.9231	34.7446	51.2374	29.2101		0.8033			-0.1515			-299
-0.1205	34.0309	30.6701	49.6583	20.0251	33.4499	38.5574	40.7103	29.578	-0.1205	53.0328	50.7504	35.0866	52.5509	39.4486	32.8935	48.9559	30.6998		0.4773			-0.1991			-300
-0.1195	33.2541	29.3982	36.527	21.0339	37.0026	39.382	35.5164	30.1703	-0.1195	48.2809	49.8745	32.7335	64.8927	33.3156	32.9257	46.8891	37.2715		0.7298			-0.161			-51
-0.1185	29.7488	31.6183	29.379	21.9394	38.559	41.6899	31.7968	32.5668	-0.1185	41.0357	49.5759	29.7534	73.8906	30.031	36.4366	46.3522	43.9361		0.2051						-122
-0.1175	26.6622	35.7546	28.2278	21.5699	36.1433	41.9091	30.8421	36.6533	-0.1175	34.1383	49.633	27.2763	77.59	32.3832	42.215	46.8075	46.4353		0.1844						-187
-0.1165	26.5142	38.1635	29.5954	19.6446	31.3705	38.8564	33.3527	40.1758	-0.1165	30.6495	47.8789	27.6399	77.404	39.9696	47.2053	46.9015	43.5424		0.284						-121
-0.1155	28.4424	36.5042	29.7462	17.6616	26.6919	34.2767	39.0566	40.5493	-0.1155	31.7271	42.8073	30.3287	77.1423	50.0646	48.8667	46.1882	37.0596		0.2246						-22
-0.1145	29.3456	31.6119	26.8888	17.701	23.2935	30.4272	45.318	37.1341	-0.1145	36.4844	36.212	32.0051	79.1091	59.3771	46.9554	45.4238	30.101		0.4276						-296
-0.1135	27.0987	26.5371	22.0379	20.1221	21.9522	27.7238	48.3935	31.2839	-0.1135	43.4689	31.8366	30.3245	81.7845	65.5255	43.5531	45.5136	25.3173		0.742						50
-0.1125	22.3267	24.2161	17.9316	22.9612	23.8533	25.2153	46.8989	24.7332	-0.1125	51.0293	31.6868	26.1897	81.8233	67.5309	41.3024	46.3004	23.9723		0.0681						-18
-0.1115	17.8008	26.0137	16.4767	24.0071	28.9017	22.9725	42.7795	18.8221	-0.1115	56.4755	34.3011	22.179	77.4068	65.2357	41.1697	46.3844	25.566		0.5562						-159
-0.1105	16.5669	31.6852	17.241	23.0414	34.198	22.815	38.4955	14.7379	-0.1105	56.9661	36.1905	19.8721	69.2898	58.9231	41.8784	44.5232	27.8408		0.3505
-0.1095	19.8752	39.945	18.5221	21.5928	36.236	26.0855	34.5018	13.2101	-0.1095	52.283	34.9348	18.9212	59.9788	49.8946	41.6517	41.1149	27.9101		0.2276
-0.1085	25.9107	48.9487	19.4483	21.0265	34.8135	31.5993	30.0781	13.9312	-0.1085	45.4637	31.6481	17.9098	52.8199	40.5995	40.2379	37.8644	24.5141		0.088
-0.1075	30.5078	56.381	20.6362	21.5493	33.2618	36.6854	25.4374	15.9986	-0.1075	39.7623	30.3341	15.9047	50.514	33.17	38.991	36.3161	19.4441		0.5296
-0.1065	29.9534	59.4656	23.156	22.8842	34.3801	39.8584	22.0397	18.9118	-0.1065	35.8278	34.1048	13.6591	52.8797	28.0378	39.1559	37.172	16.3565		0.1989
-0.1055	23.8903	55.9759	27.2842	25.1579	37.3651	41.6874	21.4624	22.642	-0.1055	32.4407	41.9983	13.2977	56.4057	24.4628	40.5568	40.5524	18.1975		0.0556
-0.1045	15.4807	46.3563	32.0361	28.712	39.2394	43.2191	24.5577	26.7289	-0.1045	29.0563	49.8517	16.2977	56.9296	22.0059	42.0469	46.2505	25.5053		0.8066
-0.1035	8.7156	34.718	35.48	33.2472	38.0724	44.2723	30.7962	29.8549	-0.1035	26.5647	53.8092	21.646	52.9926	20.8617	42.6264	53.8723	36.0621		0.0484
-0.1025	5.81079	26.5711	35.6435	37.5909	33.9853	43.4075	37.5233	30.7662	-0.1025	25.6903	52.6917	26.5457	46.5761	21.0456	41.8579	62.9762	45.6012		0.2904
-0.1015	6.81203	24.7624	31.7337	40.4131	28.1806	39.1749	40.7081	29.5204	-0.1015	25.5125	47.8108	29.2315	40.9821	22.0031	39.7932	72.5095	50.0824		0.6824
-0.1005	10.4974	27.4462	24.9654	41.1303	22.4771	31.4522	38.1526	27.5987	-0.1005	24.2368	41.6259	30.5472	38.2509	23.6336	36.9656	79.9464	48.9128		0.3876
-0.0995	15.0552	29.9847	18.1608	40.2287	19.1829	22.0111	32.1158	26.9993	-0.0995	21.1894	36.572	32.3675	38.2026	27.5127	34.2669	82.1029	45.7976		0.4816
-0.0985	18.5269	28.8027	14.1979	38.9345	19.6882	13.8844	27.6159	29.367	-0.0985	17.4824	34.0667	35.1678	39.1976	35.8562	32.845	77.56	45.4742		0.6717
-0.0975	19.5783	23.8249	14.5502	38.3586	22.7967	9.85617	27.704	35.189	-0.0975	14.7928	33.8762	37.6153	39.3893	48.2134	33.975	67.6743	49.2737		0.8906
-0.0965	18.2933	17.8676	18.8996	38.2545	25.2243	11.2382	30.9009	42.9274	-0.0965	14.2613	34.6437	37.9128	37.806	60.1687	38.117	55.2857	54.0557		0.1602
-0.0955	16.0256	14.1351	25.529	36.6048	24.3373	17.4323	33.1903	49.1342	-0.0955	16.4387	35.5395	35.2064	34.9031	66.795	43.5708	43.508	55.3494		0.2101
-0.0945	14.3194	14.0048	31.8937	31.4117	20.424	25.9745	31.8391	50.3931	-0.0945	21.3077	37.2443	30.4319	31.8596	66.9232	47.2475	35.2422	51.0425		0.0927
-0.0935	13.9476	16.5091	35.7571	23.2217	16.1377	33.2171	27.2577	45.7345	-0.0935	27.9024	40.6753	26.0319	29.1538	63.0359	47.897	32.02	42.3554		0.3753
-0.0925	14.6064	19.4851	36.7805	15.2473	13.8448	36.0879	22.0431	37.2185	-0.0925	34.2406	44.6907	24.0065	26.4057	58.2672	47.4427	32.783	32.6		0.3185
-0.0915	15.12	21.3892	36.7017	10.7579	13.8383	33.922	18.8391	28.3408	-0.0915	38.2104	46.018	24.0109	23.7762	54.9164	47.9577	34.6886	25.39		0.4879
-0.0905	14.3604	22.3073	37.3541	10.5282	14.9499	28.5798	18.6577	21.996	-0.0905	39.1254	42.211	24.1375	22.7265	54.5135	48.6988	35.7032	22.8992		0.3108
-0.0895	12.4299	23.1422	38.8255	12.4823	16.1621	23.0368	20.4725	19.271	-0.0895	38.5793	34.3434	23.5428	24.6645	56.8905	47.6937	36.0492	24.9346
-0.0885	10.5927	23.976	39.8706	13.4774	17.3692	20.0558	22.3444	19.422	-0.0885	39.3115	26.3784	23.2969	29.0587	59.0949	45.123	36.802	29.6339
-0.0875	9.85534	24.1938	39.6645	11.7715	19.0774	21.2049	23.3049	21.021	-0.0875	42.787	22.2964	24.648	33.7812	56.8774	43.44	37.6639	35.1405
-0.0865	10.0804	24.4037	38.5948	8.08484	21.7514	25.8166	24.1965	23.4335	-0.0865	48.0455	23.7731	27.6154	37.543	48.3022	44.4698	36.9038	40.6876
-0.0855	10.5925	26.745	37.43	4.39119	25.3807	31.1248	26.4327	27.216	-0.0855	52.828	29.4729	31.4222	41.1263	35.7658	47.3615	33.2609	46.6189
-0.0845	11.0659	32.2175	36.3603	2.0941	29.6026	34.3215	29.9412	33.2243	-0.0845	55.2929	35.847	35.179	45.4427	24.1369	49.3985	27.3771	53.5807
-0.0835	11.7175	38.6499	35.3234	1.50539	34.2802	34.4512	32.5967	41.39	-0.0835	54.7742	39.2784	37.9114	49.0823	16.9988	48.5215	21.7128	60.8896
-0.0825	13.2037	42.4558	34.8707	2.4239	39.6816	32.1296	32.0628	50.0716	-0.0825	51.5348	38.389	38.9502	49.0995	14.857	45.0839	19.5832	65.4795
-0.0815	16.3984	42.1533	35.8951	4.57575	45.7744	28.1448	28.2347	56.5082	-0.0815	45.9071	34.7483	38.9213	44.3409	16.2103	41.3269	23.5125	63.6984
-0.0805	21.6331	39.4407	38.4305	7.65085	51.4017	23.0335	23.6824	58.3227	-0.0805	38.0012	31.7684	39.9594	36.982	19.1606	39.4627	33.1098	55.0437
-0.0795	27.7904	36.8111	41.4017	11.522	54.6971	17.6888	21.6939	55.0763	-0.0795	28.6758	32.8635	44.0672	30.4357	22.0078	40.1752	43.9098	43.3499
-0.0785	32.4959	34.63	43.5169	16.4506	54.7343	13.8216	23.8065	48.628	-0.0785	20.0028	39.4356	50.735	26.5546	23.5481	42.385	49.274	33.7324
-0.0775	33.7693	31.3183	43.6858	22.2917	52.8159	13.4513	28.7498	41.8807	-0.0775	13.7317	49.281	56.7801	25.4767	23.4903	44.2312	45.2943	28.9657
-0.0765	31.6218	26.5724	40.7967	27.3113	51.6046	17.3999	33.5704	37.085	-0.0765	9.78409	57.3974	59.2938	27.3883	22.5204	44.7071	34.441	28.8556
-0.0755	27.8076	23.2617	34.4434	28.8805	52.3143	23.9096	36.0139	35.2295	-0.0755	7.01621	59.8363	58.0974	32.849	21.9532	44.6331	23.7253	31.8338
-0.0745	24.3033	25.0097	26.278	26.0074	52.7595	29.3428	35.8866	36.401	-0.0745	5.02231	57.173	54.9958	40.9111	23.2101	45.8749	19.205	36.3046
-0.0735	22.4468	32.3323	19.5869	20.4353	48.9903	31.1069	34.3123	39.9309	-0.0735	4.69373	53.5639	52.1257	48.3964	27.048	49.5694	22.2032	40.9882
-0.0725	22.9728	42.1202	16.7779	14.9921	39.3886	29.6839	32.3521	44.4345	-0.0725	7.4825	52.3327	51.4046	52.2171	32.9912	54.9346	29.6058	44.683
-0.0715	25.7799	50.7055	17.5153	11.8681	26.7526	27.36	30.7723	48.4149	-0.0715	14.2624	53.0244	53.5707	51.7348	39.676	59.4183	36.813	45.9809
-0.0705	29.4805	56.1364	19.419	12.4396	16.1372	25.5194	30.6225	50.7234	-0.0705	24.2781	52.8334	56.8809	48.0612	45.8616	60.171	40.9927	43.7163
-0.0695	31.9096	57.4722	20.3584	16.988	11.1332	23.7363	33.0235	50.2007	-0.0695	34.9121	50.4386	58.0707	42.1975	50.869	56.06	42.4282	38.2939
-0.0685	31.6196	54.0786	20.2195	23.7037	12.1869	21.068	37.8789	45.966	-0.0685	43.0805	47.8854	55.1569	35.0205	54.304	48.6864	43.2125	32.3525
-0.0675	28.7213	47.0212	20.7447	29.1493	17.2585	17.7431	43.325	38.8565	-0.0675	47.1523	48.6244	48.7977	28.2043	56.0209	41.4533	44.997	29.4277
-0.0665	24.4265	39.4811	23.744	31.0613	23.372	15.4777	47.1091	31.6609	-0.0665	47.4517	54.1793	41.3675	23.8657	56.1902	37.2853	47.773	31.3048
-0.0655	20.3371	34.0566	29.4291	30.344	28.1044	16.0628	48.2392	26.9809	-0.0655	45.2941	62.7911	35.4798	23.3784	54.8043	36.7456	50.012	36.4108
-0.0645	17.7949	30.3153	36.3359	29.3642	30.3321	19.6617	46.9188	25.1706	-0.0645	42.1831	70.521	32.7656	26.8379	51.5693	37.9949	49.8462	41.0817
-0.0635	16.9496	26.1013	42.5558	28.7863	29.9519	24.3962	43.6623	24.7403	-0.0635	39.6949	73.5925	33.0973	33.1857	47.0458	38.4054	46.6731	42.8474
-0.0625	16.7042	20.65	46.9574	27.3315	27.2259	27.382	39.2459	24.3252	-0.0625	39.3043	70.755	35.0572	40.3628	43.3211	36.5142	41.6806	42.6816
-0.0615	16.3858	15.3273	49.3054	24.6194	22.6529	26.4405	34.7769	23.8316	-0.0615	41.7181	63.8597	37.2795	45.6692	42.2786	33.1166	36.6193	43.7328
-0.0605	16.932	11.6346	49.3831	22.7613	17.2467	21.4872	30.9398	24.1422	-0.0605	46.0544	55.9129	38.9245	46.9452	43.2009	31.074	32.4627	47.5482
-0.0595	19.4743	9.76742	46.453	24.2237	12.6005	14.5125	27.6995	26.581	-0.0595	49.6498	48.8123	39.4527	44.3812	43.2868	33.6294	29.5843	51.8041
-0.0585	23.2666	9.5323	40.2459	28.8508	10.3189	8.07972	25.2756	32.5662	-0.0585	49.4144	43.1203	39.3313	40.7939	41.0469	41.5314	28.6011	52.5359
-0.0575	26.0495	11.58	32.531	33.9902	10.9263	3.73346	24.688	42.355	-0.0575	44.3518	39.0295	40.5715	38.9488	38.2727	51.3771	30.085	48.8984
-0.0565	26.2883	16.4933	26.7476	37.1541	13.1538	1.65089	26.551	53.3282	-0.0565	36.7004	36.7513	45.1172	38.6563	37.8275	57.9818	33.4589	44.7705
-0.0555	24.417	22.777	25.3126	37.6332	14.8138	1.38337	29.7056	60.5269	-0.0555	30.0472	36.3189	52.669	37.5535	40.2023	58.8298	36.8981	44.6479
-0.0545	22.3574	27.0622	27.5979	35.7465	14.8871	2.61754	31.8131	60.2054	-0.0545	26.6495	37.2712	60.6504	34.5795	43.3754	55.0997	38.6012	48.4557
-0.0535	22.4493	27.3541	30.7353	31.8038	14.3481	5.2417	31.2324	52.6676	-0.0535	26.9073	38.557	66.0203	31.483	45.5605	48.6763	38.1082	51.6437
-0.0525	26.0767	25.5506	31.8883	26.403	14.527	8.93308	28.0178	41.2012	-0.0525	30.1855	39.087	67.1147	30.5706	46.74	40.4414	36.7074	50.4627
-0.0515	32.1369	25.5912	29.9008	20.9877	15.2905	12.8698	23.5836	29.2281	-0.0515	34.8943	38.3619	64.2525	31.7824	47.6123	31.756	36.4498	45.8939
-0.0505	37.1319	29.2616	25.8429	17.4057	15.5543	15.9208	19.7374	19.2613	-0.0505	38.545	36.3688	58.9766	32.6449	48.2742	25.5458	38.1195	41.7095
-0.0495	37.7561	34.9891	22.3337	16.7834	14.9958	17.1633	17.4321	13.3485	-0.0495	39.0758	33.4547	52.784	30.9864	48.1815	24.7346	40.3193	39.9571
-0.0485	33.6328	40.5742	21.6849	18.8145	14.3211	16.6231	15.9706	12.919	-0.0485	36.4674	30.8908	46.6087	27.3614	46.7274	29.9145	41.1721	39.6314
-0.0475	27.211	45.2692	24.197	22.0186	14.0394	15.7045	13.8019	17.9989	-0.0475	32.8582	30.9216	41.3481	24.6109	43.7907	38.6861	40.5931	39.049
-0.0465	21.2148	48.5235	28.1744	24.7484	13.8421	16.3638	10.2836	26.86	-0.0465	30.856	35.068	38.3282	25.053	40.2982	47.2251	40.1363	38.1486
-0.0455	16.7205	48.6053	31.2884	26.0467	13.2828	19.2593	6.28222	36.5276	-0.0455	31.335	42.0783	38.4807	28.2666	38.3104	52.8232	40.8225	38.4725
-0.0445	13.5351	44.0124	31.9508	25.604	12.4545	22.8695	3.07754	43.8906	-0.0445	32.6918	48.282	40.925	31.8159	40.0278	55.2797	41.9074	41.806
-0.0435	11.6301	35.4053	30.2094	23.2909	11.7934	24.7876	1.20878	46.978	-0.0435	32.5321	50.737	43.0682	33.9507	46.2106	55.9414	42.1511	48.6978
-0.0425	11.5239	25.3237	28.0149	19.3402	11.572	23.8641	0.442105	45.6529	-0.0425	30.2693	49.9002	42.8913	35.0889	55.3745	55.6362	41.9928	57.5228
-0.0415	13.2705	16.6327	27.8817	14.9076	11.8818	21.1414	0.397329	41.19	-0.0415	27.6397	48.5374	40.9611	37.0393	64.3642	54.0264	43.7821	65.0147
-0.0405	15.6561	11.4853	30.2874	11.6616	12.8373	19.0956	1.00505	35.2701	-0.0405	26.4357	48.0908	39.402	41.599	69.9999	51.2201	49.421	68.3421
-0.0395	16.8879	10.7812	32.5975	10.5616	14.5633	20.1332	2.52913	29.4388	-0.0395	26.5525	46.9962	38.9649	49.2781	70.7687	49.2226	57.8405	66.6823
-0.0385	16.0092	13.7394	31.4398	11.5208	17.2734	25.2074	5.2417	25.1905	-0.0385	27.0784	43.0364	38.4046	58.1146	67.2059	50.4088	65.0197	60.8635
-0.0375	13.528	18.1292	26.209	14.3663	21.4644	32.7833	9.01703	23.7527	-0.0375	28.7033	36.6857	37.14	64.2772	61.0151	54.5624	67.1298	52.3807
-0.0365	11.0944	21.534	19.6088	19.4859	27.4896	39.0152	13.2213	25.2969	-0.0365	33.6575	31.0453	36.7913	65.2359	54.5221	58.524	64.1774	43.2061
-0.0355	10.7343	22.7605	14.8521	27.1085	34.5238	40.2234	17.039	28.7568	-0.0355	42.8865	28.5781	38.7931	61.9772	50.766	59.0525	59.8081	35.9089
-0.0345	13.6513	21.9792	13.3016	36.172	40.468	36.0096	19.9297	32.8263	-0.0345	53.8299	28.9393	41.7763	57.3107	52.3295	55.6157	56.9873	32.8864
-0.0335	18.9323	19.7013	14.8767	44.1434	43.6526	29.439	21.9149	36.8794	-0.0335	61.646	30.0185	42.7516	52.8804	58.7069	50.2721	55.1144	34.4724
-0.0325	23.5964	16.2672	19.3392	48.3703	44.3845	24.0529	23.4444	40.8633	-0.0325	62.9087	30.0688	40.3132	48.7787	65.3757	45.2551	52.111	37.8046
-0.0315	24.6971	12.5377	26.2187	48.2306	44.025	21.1922	24.8334	44.8068	-0.0315	58.2775	28.659	35.8042	45.0782	66.9535	41.1626	47.761	38.9116
-0.0305	21.8062	10.3772	33.9149	45.8099	42.9034	20.07	25.8346	48.4352	-0.0305	51.7726	26.41	31.8555	42.2049	61.8013	37.7181	43.9608	36.6339
-0.0295	17.3673	11.8031	39.6728	43.7337	40.2587	19.5526	25.8245	50.6818	-0.0295	47.3136	24.2378	30.3616	40.0039	53.1762	35.4484	42.6914	33.7748
-0.0285	14.5489	17.5479	41.0262	42.8748	36.1052	19.2828	24.1802	49.7232	-0.0285	45.3916	22.6457	31.6855	37.8196	45.8072	35.138	44.4958	33.9884
-0.0275	14.7378	26.3182	37.6533	42.9338	31.938	19.2122	20.5733	44.5748	-0.0275	43.2718	21.7709	35.3639	35.839	41.5753	35.719	48.1386	38.1131
-0.0265	16.9321	35.1645	31.6624	43.9212	29.1807	18.8837	15.5128	36.7865	-0.0265	38.8147	22.1805	41.1778	35.562	38.6475	34.5115	51.24	43.7322
-0.0255	19.1966	40.8603	25.7905	45.2667	27.6376	17.8751	10.7475	29.6434	-0.0255	33.3192	25.1945	48.8292	38.4866	34.5397	30.2603	51.9744	47.6641
-0.0245	20.2895	41.7197	21.7881	44.6325	26.0936	16.4606	8.63284	25.3751	-0.0245	30.0752	31.7051	56.6546	44.3537	29.4448	24.6933	50.4922	48.4349
-0.0235	20.0673	38.5488	20.4101	39.8886	24.1841	15.09	10.7838	23.5287	-0.0235	31.0963	40.2954	61.725	50.8981	25.9525	20.3809	48.3843	46.6855
-0.0225	19.2351	33.6318	21.5557	31.9055	22.745	13.569	16.9968	22.0982	-0.0225	35.8905	47.0773	62.0216	55.6823	25.8163	17.9931	46.8959	43.9931
-0.0215	19.1602	28.7616	23.724	23.9673	22.1499	11.3592	24.8731	20.0274	-0.0215	42.4879	48.8285	58.5467	58.385	27.9551	16.4575	45.827	41.4708
-0.0205	21.0868	24.4672	24.4291	19.195	21.3956	8.55481	30.6186	18.5044	-0.0205	48.9726	46.7299	54.9221	60.9281	29.9207	15.0059	43.8295	39.0166
-0.0195	24.7326	20.6887	22.0954	19.3945	19.3835	6.23444	31.4846	19.5619	-0.0195	54.5521	45.7362	54.5326	64.7601	30.7112	14.0718	39.7911	35.8996
-0.0185	28.0645	17.4308	17.3448	24.8035	16.3307	5.84958	28.3401	23.2294	-0.0185	59.8151	49.4801	57.9456	68.1986	31.2819	14.5029	34.0458	32.3903
-0.0175	29.1157	14.7937	12.3822	33.1916	13.2973	8.289	25.324	26.6289	-0.0175	65.9383	56.4994	62.846	67.1997	32.3823	16.7173	28.1616	30.2954
-0.0165	28.0042	12.9011	9.55156	40.0954	10.978	13.2593	26.0097	26.7477	-0.0165	73.2894	61.6294	65.8612	59.1997	33.0406	20.5519	23.8076	31.0529
-0.0155	26.7987	11.9154	10.2004	41.8883	9.58454	19.4207	29.8991	24.1688	-0.0155	80.4248	60.4599	64.5164	46.0977	32.1233	25.485	22.0351	33.8686
-0.0145	27.4095	12.1947	14.0214	38.8577	9.35071	25.2917	33.1471	23.2361	-0.0145	84.4648	53.0099	58.4626	33.2818	31.0968	31.0033	23.1079	36.845
-0.0135	29.832	14.5185	19.0365	34.5253	10.3071	30.1081	32.7321	27.9517	-0.0135	83.1855	44.0844	49.4872	25.9728	34.0037	36.6824	26.5471	39.5337
-0.0125	32.3888	19.5282	22.5252	32.0624	11.761	33.8196	29.4064	37.7879	-0.0125	76.8156	39.668	40.126	26.3887	43.6107	41.8916	31.5876	43.0879
-0.0115	33.2889	26.1922	22.5801	31.6661	12.6882	36.8087	26.3397	47.9466	-0.0115	67.1932	42.0612	32.1768	33.1075	57.6628	45.8167	37.5722	48.1104
-0.0105	31.9537	31.4208	19.2951	31.2048	12.85	40.0474	25.5006	53.9381	-0.0105	55.734	48.3428	26.6322	42.1351	70.1128	47.9476	43.72	53.5055
-0.0095	29.4863	32.5068	14.7613	28.9668	13.2728	44.547	26.1583	55.2564	-0.0095	43.3243	53.4469	24.3392	49.3306	76.5846	48.1899	48.7774	57.4344
-0.0085	28.1001	29.9091	11.7155	25.4105	15.2334	49.4564	26.6057	53.9876	-0.0085	31.5767	54.4389	25.8127	53.013	77.8195	46.4974	51.2707	58.5528
-0.0075	29.2924	26.6304	11.5642	22.1983	18.5116	51.5079	26.3641	51.0426	-0.0075	22.7156	51.9563	30.4099	54.255	77.2284	42.8143	50.426	56.5148
-0.0065	32.1876	24.7381	13.3105	20.1244	21.0398	47.9865	26.3473	45.5487	-0.0065	18.0942	48.1481	36.1896	54.3898	76.4701	37.6923	47.3373	52.3538
-0.0055	34.4644	23.4078	14.5955	18.4784	20.8502	40.0761	27.4408	37.6413	-0.0055	17.4493	44.0959	40.6647	53.2342	74.8128	32.8051	44.904	48.4625
-0.0045	35.3066	20.7744	14.0589	16.3389	18.0449	31.8721	29.5165	29.977	-0.0045	19.5282	39.8354	41.8842	50.2895	71.4701	30.5055	45.5278	46.805
-0.0035	36.6827	16.8131	12.4099	14.0528	14.2472	26.1128	31.854	25.7011	-0.0035	23.0309	36.3496	39.4506	46.2163	66.5288	32.8194	48.6155	46.7362
-0.0025	40.8106	13.4833	11.1041	13.0626	10.6881	22.1232	33.9889	25.4914	-0.0025	27.015	36.078	34.8026	41.9967	60.0463	40.7808	51.1753	45.9188
-0.0015	46.7334	12.4561	10.696	14.2442	7.68886	17.9703	35.8645	27.0601	-0.0015	30.3716	40.448	30.3304	37.6967	51.7239	53.8616	50.9522	43.6059
-0.0005	50.6362	13.7287	10.8555	16.8884	5.64228	13.3453	37.5451	27.6696	-0.0005	31.4422	47.2664	28.0261	33.0961	41.5244	68.8165	48.0899	41.5962
0.0005	49.8317	16.4407	11.283	19.5681	5.6793	9.98072	39.505	27.4094	0.0005	29.3494	51.546	28.6508	28.8113	30.3301	79.5193	43.9582	41.7467
0.0015	45.3766	20.1135	12.1371	21.7578	9.66262	10.4512	43.5694	30.4589	0.0015	25.6401	49.3662	31.9418	26.0176	20.1653	80.0853	39.6551	43.6438
0.0025	40.3501	24.4658	14.0661	24.629	20.5224	18.1458	53.8529	44.0637	0.0025	23.3644	40.9584	37.3519	25.6744	13.5163	69.5025	35.7165	44.825
0.0035	36.668	28.4485	18.246	31.3151	42.8019	39.19	76.7832	76.2832	0.0035	24.3516	30.2712	44.1733	28.4437	11.9161	52.786	32.2077	42.6756
0.0045	34.3131	30.4963	26.7043	46.9727	81.8209	83.2189	119.406	132.26	0.0045	28.0474	21.8787	50.9124	34.5491	14.9213	37.1147	29.0032	36.3866
0.0055	32.8332	30.3803	43.0437	77.6464	140.915	159.131	185.922	209.632	0.0055	32.6682	18.3104	55.3187	42.9185	20.3785	27.1093	26.458	27.503
0.0065	32.2577	30.5698	72.9308	128.097	219.572	266.918	274.247	298.015	0.0065	36.8799	19.5846	55.6575	50.7222	25.6867	23.3302	25.2304	18.5481
0.0075	32.3406	35.2583	123.429	200.532	314.915	392.507	373.536	384.295	0.0075	40.5998	24.1606	51.7422	54.5354	29.0828	23.6559	25.0705	11.3786
0.0085	32.1531	48.0511	200.877	294.212	422.87	510.698	463.881	455.934	0.0085	44.4632	29.9718	44.7435	52.98	30.1696	25.2192	24.847	6.99442
0.0095	31.3998	70.5477	306.646	403.103	533.352	594.546	522.146	498.832	0.0095	48.6303	35.3856	36.6316	48.7067	29.7291	26.2479	24.4527	6.37696
0.0105	31.1914	102.358	431.071	512.079	623.994	626.116	534.421	500.526	0.0105	52.5235	39.9949	29.7967	47.0032	29.172	27.4743	25.8072	11.1431
0.0115	32.3438	142.019	550.745	596.882	665.71	603.226	504.341	462.119	0.0115	55.6025	44.2578	26.2124	51.3207	29.5396	31.9802	31.7712	23.4842
0.0125	33.8038	188.699	636.025	631.915	642.368	538.563	447.914	402.265	0.0125	57.5575	48.0362	26.0485	60.148	30.4371	43.562	45.179	45.5998
0.0135	34.1177	243.525	667.2	603.949	565.956	452.759	382.097	343.464	0.0135	57.8822	50.1001	27.1754	68.7998	30.4285	65.6738	69.123	78.9021
0.0145	33.6565	306.638	646.338	522.718	468.575	366.805	319.582	296.541	0.0145	56.3124	49.4505	26.9087	73.9143	29.2907	100.645	106.311	122.38
0.0155	33.8693	370.312	592.226	417.545	378.472	296.327	269.666	259.553	0.0155	53.8688	46.673	24.6565	75.5466	29.377	146.752	156.182	169.853
0.0165	34.9392	417.913	523.403	320.374	305.785	247.906	237.301	226.791	0.0165	52.5143	43.4211	22.5239	75.1278	33.4871	195.264	212.207	209.478
0.0175	35.7082	434.731	448.813	250.268	249.375	219.276	219.507	195.494	0.0175	53.176	40.692	23.1239	72.6166	41.2322	233.616	262.693	229.219
0.0185	35.6327	419.767	373.762	210.885	209.66	204.129	206.186	165.955	0.0185	54.7033	38.3718	27.0495	66.8564	48.5225	253.535	295.14	224.377
0.0195	35.2531	384.491	307.377	195.984	190.326	197.184	188.04	138.76	0.0195	55.4799	36.7051	32.6158	58.2729	51.4653	254.364	301.105	199.082
0.0205	34.5482	342.188	259.852	194.464	191.198	194.56	163.703	114.237	0.0205	55.5559	37.0207	37.6483	49.5874	50.4735	238.951	279.475	161.574
0.0215	32.5282	301.632	235.392	195.24	204.574	191.104	138.076	94.0182	0.0215	56.1352	40.2317	41.2353	43.3656	49.7428	210.938	237.614	119.864
0.0225	29.3407	268.114	230.73	193.316	219.321	180.438	115.916	80.892	0.0225	57.0966	45.4713	44.108	39.6996	52.4193	176.756	189.503	80.6124
0.0235	27.1711	244.874	238.531	191.453	226.99	159.238	99.115	75.974	0.0235	56.3986	50.5636	47.7707	36.8675	57.1746	145.275	149.818	49.0628
0.0245	27.577	232.198	249.677	193.728	223.607	130.663	88.0894	76.9759	0.0245	52.3936	53.0425	52.9744	34.0271	60.2505	122.928	126.471	28.4341
0.0255	28.9659	226.868	254.313	197.801	207.776	102.816	82.3815	80.3816	0.0255	45.6202	51.0067	58.8092	32.5001	59.8246	110.752	117.333	19.02
0.0265	28.2627	223.322	246.019	195.511	180.57	83.7428	80.6501	84.9587	0.0265	38.0008	44.6242	63.7336	34.3416	57.152	106.166	114.006	17.8498
0.0275	24.5843	216.107	227.215	181.079	147.65	76.9837	82.1321	91.7817	0.0275	31.2839	37.1933	67.1855	40.1012	54.5704	105.643	108.67	19.8041
0.0285	20.0776	203.263	207.562	157.328	117.691	79.984	87.0371	100.641	0.0285	26.344	33.444	69.0873	47.533	54.0375	105.358	98.1202	20.3301
0.0295	17.6647	188.437	194.696	133.59	96.1981	85.6928	93.6329	107.709	0.0295	23.0206	35.8934	68.2372	52.0198	56.4602	101.394	83.5697	17.9754
0.0305	18.9376	178.759	188.168	118.727	82.4741	86.9455	96.4854	107.659	0.0305	20.4098	42.8808	63.1597	49.3713	60.5497	91.5454	68.1521	14.2641
0.0315	23.4658	179.664	183.465	116.219	73.7669	81.0553	90.3371	97.6291	0.0315	17.7519	50.08	54.9402	39.3933	62.997	77.66	54.1325	11.0851
0.0325	28.9957	191.106	179.036	123.416	69.9858	70.6903	75.479	79.3186	0.0325	15.303	53.8926	47.5389	26.3945	61.3869	65.2154	41.7355	8.74103
0.0335	32.9978	207.797	177.155	133.297	72.4553	60.2202	57.7107	57.7929	0.0335	14.4492	53.85	44.3989	15.722	56.6048	59.4131	30.4578	6.52601
0.0345	34.9061	222.784	180.065	137.808	79.6208	51.8025	43.4796	38.247	0.0345	16.9641	52.1541	45.3696	10.0228	51.4932	61.2406	20.8286	4.19519
0.0355	36.2203	231.841	187.305	132.342	86.497	45.0145	36.0024	23.675	0.0355	23.7785	51.2909	47.0889	8.61454	47.8471	67.0072	14.1068	2.18999
0.0365	38.2855	235.569	195.52	118.767	88.765	38.9232	34.8267	15.0093	0.0365	34.0141	52.2875	46.0224	9.61401	45.7282	71.1586	10.6007	0.906557
0.0375	41.1354	237.359	199.593	103.854	86.2286	33.5304	37.0771	12.0187	0.0375	44.9466	54.532	41.5975	12.2266	45.1561	70.1251	9.21222	0.306688
0.0385	44.2378	239.025	194.758	94.0276	81.7815	29.5355	38.9427	13.4454	0.0385	53.1004	56.0988	36.8003	16.9511	47.1225	64.8492	8.77755	0.147731
0.0395	46.7173	238.972	179.362	91.3121	78.4409	27.3592	37.4593	17.2197	0.0395	56.4071	54.4095	35.3471	23.741	52.4418	59.868	9.07088	0.306688
0.0405	47.0828	234.431	156.9	93.7799	77.9422	26.8132	32.0136	21.5399	0.0405	55.8399	48.011	38.0411	30.8089	59.9603	59.3132	10.2042	0.902096
0.0415	44.2854	224.803	135.285	98.5538	80.1809	27.9023	24.3724	25.6835	0.0415	54.0805	38.4944	42.2825	35.9235	66.5036	63.9038	11.5842	2.15866
0.0425	38.9887	213.588	122.511	103.777	82.6243	31.2126	17.315	29.6652	0.0425	52.3099	30.0989	45.0833	38.208	69.1026	71.9245	12.0279	4.03292
0.0435	33.2646	207.081	121.12	109.042	81.7057	36.5639	13.0081	33.6414	0.0435	49.4761	26.8643	45.776	37.8491	67.3898	81.6803	10.7559	5.86786
0.0445	29.5628	209.135	126.592	115.178	76.4634	41.779	11.9883	37.7914	0.0445	44.8737	30.0948	45.7105	35.039	63.4473	91.2971	8.04107	6.64915
0.0455	29.7945	215.914	132.599	123.232	70.881	44.3325	13.3011	41.9964	0.0455	40.0522	38.2787	45.9882	30.4505	59.3279	96.9262	4.93501	5.87009
0.0465	34.3657	217.474	138.248	133.259	71.9627	44.6309	15.6997	45.4167	0.0465	37.6311	48.5638	46.0175	25.8573	55.4882	94.2159	2.45081	4.04969
0.0475	41.9749	206.362	148.302	144.469	84.791	46.2304	18.7697	47.0203	0.0475	38.8928	58.0815	44.3706	23.1543	51.7737	82.7706	0.975961	2.24707
0.0485	50.4493	184.834	164.886	156.113	108.48	51.9165	22.9501	46.65	0.0485	42.7904	64.6657	40.7865	23.3133	48.9676	67.5005	0.321233	1.26587
0.0495	57.184	163.379	180.709	166.933	135.845	60.3013	28.5452	45.1754	0.0495	47.2519	67.1376	36.9331	26.4527	48.5245	54.6561	0.149961	1.48415
0.0505	59.3165	151.37	182.974	172.867	156.27	66.8228	34.7386	43.612	0.0505	51.2776	65.0737	34.9518	31.7115	50.8122	47.4556	0.306688	3.13463
0.0515	55.2574	147.818	164.184	166.765	160.06	67.4831	39.4781	42.2046	0.0515	55.3313	58.5473	35.3299	36.9424	54.0619	45.3528	0.902096	6.22067
0.0525	46.3729	141.942	128.449	143.665	143.844	61.3426	40.5652	40.2162	0.0525	59.6709	48.6994	36.5224	39.834	55.6891	45.6256	2.15866	9.9791
0.0535	35.9505	124.498	87.9616	107.332	114.207	50.4373	37.306	36.6353	0.0535	63.2679	38.5118	36.6061	39.5926	54.7237	45.0747	4.03292	12.8237
0.0545	26.5452	97.683	54.5334	69.3781	84.3455	38.5743	31.5044	31.3738	0.0545	64.8874	31.8413	34.91	37.0516	52.3118	41.5844	5.86786	13.4907
0.0555	19.1165	72.636	33.9253	40.8881	64.9812	30.2135	27.1012	26.0767	0.0555	64.3057	30.823	32.1267	33.7748	50.1777	35.2872	6.64915	12.3516
0.0565	13.9097	58.6847	25.7388	25.8764	58.5564	29.2652	28.5199	23.8565	0.0565	61.6916	34.3308	29.2031	31.6361	49.7634	28.2586	5.86786	11.1244
0.0575	10.7616	56.6755	26.4131	22.0233	61.4806	38.0902	38.2882	28.4275	0.0575	56.5161	39.0544	26.4087	32.2438	51.874	22.629	4.03292	11.0851
0.0585	8.86968	60.9255	32.2484	24.7616	69.1407	56.7307	55.175	42.7322	0.0585	48.0129	41.7475	23.672	35.8619	55.2477	18.8412	2.15866	11.8741
0.0595	7.45943	64.6654	40.7523	29.8925	77.4541	81.6509	74.3929	66.3094	0.0595	36.6335	40.7802	21.6489	41.0867	56.2783	16.0068	0.899865	12.1017
0.0605	6.70978	63.7153	49.8035	34.5213	82.0464	104.872	89.8715	92.7676	0.0605	24.717	36.5891	22.1286	45.5489	52.351	13.7987	0.294374	10.7705
0.0615	7.42722	57.3473	56.2295	37.264	79.2582	116.649	96.9053	111.339	0.0615	15.711	31.156	26.9263	46.8593	45.1475	13.1342	0.0884104	8.04553
0.0625	9.90681	47.5591	56.5188	37.6096	68.7278	111.516	93.5871	113.622	0.0625	12.7964	26.781	35.6382	44.047	38.8414	14.7926	0.0884104	4.94956
0.0635	13.4418	37.6333	49.6375	35.1985	53.687	92.0781	81.0582	99.4567	0.0635	17.7982	25.1449	44.3324	38.9474	35.3019	18.0454	0.294374	2.52467
0.0645	16.8308	30.3986	38.2793	30.098	38.3451	66.681	63.212	75.8559	0.0645	30.251	26.8681	47.7344	35.1163	32.911	21.025	0.899865	1.26587
0.0655	19.0891	26.9209	26.588	23.3145	25.6408	43.6221	45.1954	51.1926	0.0655	46.6961	31.1466	43.8277	34.4538	29.9602	22.0361	2.15866	1.20655
0.0665	19.9028	26.4831	17.1297	16.3682	16.8731	26.9804	30.6406	30.874	0.0665	61.559	35.8903	35.7995	35.5761	27.0432	20.5095	4.03292	2.23476
0.0675	19.727	27.5532	10.3333	10.5034	11.7946	16.4316	20.1174	16.663	0.0675	70.1452	39.0031	29.0294	35.817	25.5576	17.395	5.86786	4.04746
0.0685	19.3267	28.6258	5.84385	6.50757	8.89431	9.83412	12.4762	7.97599	0.0685	71.1799	39.7367	27.0421	33.8454	25.7726	14.7771	6.64915	5.87009
0.0695	18.9178	28.7169	3.48718	4.77621	6.56509	5.64119	6.89106	3.32263	0.0695	66.4116	38.5803	30.4674	30.107	27.3883	14.5264	5.87009	6.64915
0.0705	17.8471	27.7901	3.15586	5.05697	4.28692	3.42786	3.20958	1.17179	0.0705	58.5723	36.348	38.4255	25.9403	30.7261	16.976	4.05192	5.86786
0.0715	15.4289	26.6458	4.34407	6.28419	2.64772	3.14355	1.21771	0.34247	0.0715	50.4659	34.1026	49.4638	23.0826	36.4426	20.7686	2.26385	4.03292
0.0725	12.1885	25.7271	5.96073	7.1819	2.73328	4.3396	0.37047	0.0805571	0.0725	44.9508	33.4524	61.0172	23.4881	44.7995	23.762	1.35652	2.16313
0.0735	10.028	24.1159	6.75211	7.45943	6.00025	5.94619	0.102955	0.014545	0.0735	43.8511	35.66	69.0274	28.4167	55.5337	24.4292	1.86694	0.928955
0.0745	10.9581	20.4968	6.2361	8.3931	14.0141	6.67824	0.095102	0.00223054	0.0745	46.3546	40.0272	69.8117	36.83	67.3508	22.9574	4.41281	0.439874
0.0755	15.65	15.2052	5.22493	11.8777	26.7389	5.94395	0.323464	0	0.0755	49.522	43.8374	63.1855	45.1298	77.1098	20.8147	9.63513	0.658152
0.0765	23.0375	10.5943	5.21719	18.6263	40.4489	4.33175	1.0476	0	0.0765	51.0831	44.479	53.0552	49.8015	80.8422	19.1668	17.3157	1.81428
0.0775	30.871	9.20691	7.09368	27.2694	48.8996	3.10216	2.74518	0.00223054	0.0775	51.2956	41.3929	44.1267	50.4648	76.6753	18.3692	25.6263	4.31956
0.0785	36.4421	11.7277	10.2075	35.3463	48.3736	3.28236	5.84942	0.014545	0.0785	51.8208	36.0887	38.2754	49.4627	66.5835	18.9946	31.8289	8.06583
0.0795	37.3923	16.2868	12.6647	41.0494	41.0473	5.21604	10.2803	0.076096	0.0795	53.3561	31.2818	34.2811	48.8918	55.0875	22.0773	34.2235	11.7379
0.0805	33.0589	19.5904	12.8259	43.7373	32.4217	8.72188	15.1291	0.308919	0.0805	54.7993	30.0771	30.47	49.0799	46.3886	27.7486	33.3833	13.3218
0.0815	25.4877	19.4515	10.8196	43.2172	26.644	13.4777	19.0463	0.988276	0.0815	54.1394	34.3094	27.0535	49.1964	42.5472	34.3154	31.4078	11.8722
0.0825	18.414	16.6789	8.43866	39.5549	25.1585	19.116	21.4184	2.52913	0.0825	49.7669	42.1874	25.8531	48.1836	43.769	39.2941	30.2282	8.69145
0.0835	14.7495	14.1851	7.45746	33.6551	27.9503	24.8226	23.4034	5.25625	0.0835	41.5868	48.2761	28.1595	45.5674	49.6686	41.364	30.6808	6.59837
0.0845	15.2409	14.1581	8.25411	27.2048	34.0145	29.5337	27.3212	9.09536	0.0845	31.4984	47.7802	33.4859	42.1269	59.5809	41.2751	32.6214	8.48124
0.0855	18.9998	16.2752	10.0882	22.0276	41.0434	33.3869	34.298	13.5448	0.0855	22.4244	41.2196	40.3575	39.4375	71.5331	40.8361	35.2054	16.4462
0.0865	24.0135	18.3501	12.2217	19.7826	46.3897	38.55	42.5895	18.0989	0.0865	16.4245	33.8117	47.6962	38.2997	81.8117	41.0558	37.12	30.9718
0.0875	27.2262	18.4079	14.2426	21.3522	48.9411	47.3491	48.977	22.7364	0.0875	13.7646	30.4563	55.006	37.8833	86.7196	41.6135	37.2675	49.7143
0.0885	25.9406	16.3642	15.5822	25.502	49.2718	59.3578	52.1595	28.0016	0.0885	13.5704	32.3125	61.2758	36.903	85.0538	42.0771	35.4065	67.485
0.0895	20.1105	13.9029	15.6091	29.0622	47.803	70.7888	54.3544	34.4309	0.0895	14.669	37.4432	64.2822	35.4159	78.4692	42.5863	31.8514	78.543
0.0905	12.5454	12.6505	14.4049	29.8237	44.14	77.0003	59.3674	41.6365	0.0905	15.8352	43.2448	62.0202	34.9777	69.267	42.8347	26.8832	79.7691
0.0915	6.49984	12.6295	12.8821	28.8663	38.9251	75.775	69.2231	48.1251	0.0915	16.2672	48.3078	55.1526	36.9555	58.4364	41.3863	21.0635	72.3227
0.0925	3.59503	12.6267	12.1947	28.978	34.9814	68.3547	82.0637	52.6221	0.0925	16.4128	52.7236	47.2419	40.8691	46.3666	36.9498	16.1122	60.6225
0.0935	3.88119	11.7319	13.5519	31.2436	35.189	57.6671	92.4384	55.6015	0.0935	17.7478	56.6992	42.2308	44.6585	34.7002	30.2842	14.8796	49.4616
0.0945	6.74896	10.2165	18.0222	34.2987	39.3965	46.5268	94.453	58.8685	0.0945	21.3055	59.1184	42.2138	46.633	26.2126	24.4949	19.8828	41.7816
0.0955	11.2002	8.9847	25.3623	36.711	44.2389	37.7619	86.1839	63.3991	0.0955	26.5765	58.0349	46.8218	46.7025	22.6496	22.8846	31.2914	38.5432
0.0965	15.8744	8.39253	33.1977	38.9888	46.279	34.0782	71.2301	67.9467	0.0965	31.9985	52.7236	53.08	45.4005	23.1237	26.0353	45.8751	39.2786
0.0975	19.6252	7.91503	38.6776	42.6615	44.9233	35.8881	55.9036	69.8479	0.0975	36.3532	44.8611	56.4368	42.7447	24.8532	31.0627	58.1618	42.0426
0.0985	22.0486	7.07441	41.3431	47.7857	41.9353	40.1328	45.242	66.9964	0.0985	39.499	37.369	54.2186	39.2005	25.3733	34.106	63.5392	43.9502
0.0995	23.1075	6.26991	43.5111	52.1265	38.9858	42.9578	40.9886	59.592	0.0995	41.721	32.2841	48.6415	36.7208	24.1237	33.5978	61.0231	43.0055
0.1005	22.6354	6.22067	47.2727	52.8348	36.6156	43.2627	41.6731	50.4151	0.1005	42.8282	30.0855	45.169	37.0339	22.3188	31.312	53.4009	39.5787
0.1015	20.8027	6.84382	51.6775	48.6243	34.8472	42.4501	43.7847	43.043	0.1015	42.5181	30.648	47.1715	39.4618	21.6838	30.8654	45.1531	35.9643
0.1025	18.6316	7.23567	53.5364	40.5504	33.5753	41.3696	43.7967	39.5542	0.1025	41.5575	34.1701	52.6005	41.9148	23.352	35.0473	40.1256	34.6412
0.1035	17.159	6.85613	50.6517	31.0395	32.5826	39.0104	40.5432	39.7225	0.1035	41.8145	40.8632	56.1742	43.4782	27.6192	43.4615	39.7579	36.7859
0.1045	16.2057	6.27999	43.612	22.3686	31.7283	34.3233	35.9249	41.8945	0.1045	44.4577	49.8075	54.4279	44.7325	34.2546	52.4539	42.2337	41.7483
0.1055	14.8372	6.48595	34.8577	16.1212	30.9031	28.0603	32.5691	44.5241	0.1055	48.2866	58.5591	48.1744	46.0613	42.5113	57.814	43.9341	47.4358
0.1065	13.0534	7.66759	27.0731	13.383	29.9358	22.12	30.9178	47.4342	0.1065	50.4594	64.6265	40.8629	46.8215	50.5722	57.4987	42.8073	51.7527
0.1075	12.2626	9.09996	22.4191	14.514	29.075	17.7367	29.3158	51.4846	0.1075	48.9979	67.1005	35.9289	46.0061	55.7559	51.8319	39.8907	54.6722
0.1085	13.8448	9.97464	22.0352	18.6275	29.2633	15.0267	26.5834	56.5721	0.1085	44.2769	66.2841	35.3664	43.1478	56.4631	42.4326	37.1996	58.2637
0.1095	17.709	9.91755	25.3897	23.7899	31.065	13.8457	23.4019	60.4461	0.1095	38.2046	62.4784	39.1781	38.7597	53.7088	32.0074	35.2314	63.2687
0.1105	22.2869	8.82459	30.2793	28.1748	33.4531	14.2834	21.1723	60.4214	0.1105	32.6265	56.053	45.7462	34.103	49.7011	24.0799	33.3495	66.4109
0.1115	25.4877	6.84159	33.9247	31.2192	34.6617	16.2865	20.3919	56.1907	0.1115	28.6743	48.1541	53.1373	30.3135	45.5066	21.3585	31.5683	63.15
0.1125	25.6614	4.6172	34.5225	33.4035	34.2909	19.1954	20.355	50.3372	0.1125	26.8778	40.8016	59.8568	27.7329	41.2808	24.3273	30.6087	52.8702
0.1135	22.3401	3.1324	32.2712	34.7833	33.491	21.7894	20.0797	46.1746	0.1135	27.1151	36.8204	64.3968	26.2828	37.6537	31.7383	30.4379	39.674
0.1145	16.6396	3.07307	29.0016	34.5309	32.9696	22.7828	19.2267	45.5014	0.1145	28.7479	39.3706	65.4155	26.0888	35.1439	41.6851	30.2412	28.6009
0.1155	10.8561	4.32729	26.5243	32.3975	31.912	21.5286	18.1563	47.9206	0.1155	31.5546	49.5347	62.9877	27.2349	32.9923	51.5787	30.5733	22.5638
0.1165	7.16324	5.94395	25.2139	29.5295	29.3844	18.3862	17.3234	51.0614	0.1165	36.4593	63.2594	58.6221	29.1672	30.1856	58.1114	34.3132	22.1751
0.1175	6.34862	6.67824	24.1134	27.1601	26.1481	14.4894	16.836	51.5716	0.1175	44.5002	72.1999	53.6433	30.8702	27.1271	58.7537	43.8281	26.65
0.1185	7.67324	5.94395	22.122	25.4554	24.3571	11.4156	16.4952	47.2463	0.1185	54.7221	69.6378	48.3847	31.5314	25.1347	53.9204	57.1453	34.6678
0.1195	9.85988	4.32506	19.0208	24.2261	25.5566	10.901	15.9999	38.8557	0.1195	63.583	55.9333	42.9666	30.8803	24.6373	47.2622	68.2722	45.0899
0.1205	12.0908	3.06076	15.5152	24.1635	29.2636	14.0441	15.1323	29.7282	0.1205	66.9696	37.9743	37.833	29.2098	24.8293	43.3038	72.0082	56.7385
0.1215	13.9527	3.07307	12.5625	26.5949	33.2005	20.1837	13.9644	23.385	0.1215	62.992	23.8077	33.4492	27.3625	24.9906	44.4367	67.7329	67.1903
0.1225	14.7495	4.40116	11.0081	31.593	34.6961	26.8587	12.9504	21.3504	0.1225	53.3335	17.852	30.3088	26.3182	25.3584	49.6694	58.4631	72.5886
0.1235	13.709	6.24841	11.646	36.5757	32.5675	31.4225	12.6787	22.5985	0.1235	42.3249	19.7168	28.9964	26.2947	26.5609	55.613	47.9673	69.9993
0.1245	11.095	7.63966	14.9594	37.9255	28.0895	32.6714	13.4508	24.6843	0.1245	34.3248	25.8021	29.3436	26.3594	28.7851	58.6878	39.6054	60.0935
0.1255	8.43866	8.33544	20.7573	34.4346	23.7157	30.8464	15.0148	25.7611	0.1255	31.276	31.7718	29.7525	25.4968	31.679	57.3031	35.921	46.7922
0.1265	7.17986	9.03956	28.2699	28.3931	20.7198	26.6873	16.532	26.0406	0.1265	32.3326	34.6347	28.3589	24.3112	34.5148	52.5845	37.3332	34.5315
0.1275	7.35424	10.4773	36.0439	23.1606	18.3721	21.1978	17.1056	26.9985	0.1275	35.2787	34.0713	25.0841	25.397	36.4745	47.1673	41.3451	26.355
0.1285	7.91503	12.484	41.4498	20.4519	15.3394	16.0123	16.9768	29.006	0.1285	37.9661	32.6307	22.0013	31.3275	37.5802	43.3454	44.3379	23.4675
0.1295	8.11716	14.2011	41.6023	19.8513	11.5047	13.0819	17.9215	30.6556	0.1295	39.0969	33.9721	21.3356	41.6913	39.2555	42.283	44.7748	25.2031
0.1305	8.09715	14.8627	36.0498	19.8591	8.32147	13.5933	21.4864	30.8423	0.1305	38.6982	39.5055	23.3397	52.3638	42.9265	44.2497	44.2116	29.5522
0.1315	8.10485	14.2011	27.9487	19.0533	7.54037	17.3464	26.8306	30.482	0.1315	37.9132	46.6926	26.2173	58.5309	47.9713	48.9631	44.8366	34.2831
0.1325	7.85571	12.4863	21.6178	16.7804	9.64063	23.0157	31.1376	31.3552	0.1325	37.7032	51.458	27.7915	58.6725	52.1855	55.4299	46.6558	37.6409
0.1335	7.13373	10.4919	19.2145	13.3097	13.3127	28.7115	32.3985	33.8381	0.1335	37.906	52.2967	27.0708	55.1505	54.4746	61.8332	47.7827	38.3528
0.1345	6.55759	9.11789	19.9274	9.66956	16.5404	32.7479	31.1712	36.3274	0.1345	38.0007	51.4117	24.661	51.2089	55.9363	66.4228	46.9641	35.7688
0.1355	7.10822	8.65668	21.42	7.38952	18.3559	34.592	29.3214	36.6128	0.1355	38.098	51.682	22.3997	48.5593	57.9351	68.3942	44.9396	30.2994
0.1365	8.94316	8.69172	21.5821	8.03956	19.397	34.8961	27.7708	33.6103	0.1365	38.3493	53.1792	22.7002	47.9352	60.1897	67.4705	43.4216	23.6418
0.1375	11.0503	9.02715	19.7203	12.3836	20.8476	34.3228	26.488	28	0.1375	38.1412	53.6067	27.6731	50.2151	61.2547	63.3183	43.3846	18.5194
0.1385	12.1185	10.4252	16.7673	19.6938	23.5292	32.8351	26.4507	21.4302	0.1385	37.174	51.6317	38.0114	55.3148	60.1905	56.1646	44.4789	17.8316
0.1395	11.6849	14.0664	14.3035	27.9698	27.9117	30.2089	29.8122	15.3277	0.1395	36.6882	48.3295	52.261	60.4063	57.4709	47.4796	45.6657	23.2091
0.1405	10.5534	20.4731	13.3964	34.9284	33.717	26.4149	36.9789	10.575	0.1405	38.0612	45.7158	67.1054	61.4943	54.5935	39.2847	46.1122	33.8341
0.1415	10.1577	29.0631	14.3919	38.7661	39.1527	21.4407	44.6665	7.84024	0.1415	40.3705	45.3872	78.4388	57.9079	52.6971	33.2437	46.0004	46.8127
0.1425	11.3794	38.333	17.1456	38.6949	41.7302	15.6359	48.5314	7.49101	0.1425	40.8621	47.9429	82.9786	53.9632	51.1417	30.8926	46.9754	59.1763
0.1435	13.829	46.1979	20.9672	35.8756	40.6703	10.3749	47.4779	9.0338	0.1435	38.0685	51.979	80.1279	54.7742	47.7856	33.5744	50.9091	69.4639
0.1445	16.1514	50.7481	24.8254	33.3919	38.0523	7.79258	44.2398	11.0671	0.1445	33.2972	54.1156	72.4179	60.7879	41.3764	40.6113	57.2092	76.9936
0.1455	16.9349	51.4479	28.0425	33.9124	37.2746	9.63447	42.0068	12.1207	0.1455	28.6817	51.8536	63.3018	67.2926	33.4498	48.1138	62.009	80.516
0.1465	15.6807	49.6157	30.3527	37.2343	40.5188	16.0527	41.4914	11.6938	0.1465	25.0272	46.205	54.521	69.0618	27.2264	51.2424	61.2573	79.249
0.1475	13.3421	47.0691	31.2049	40.6312	46.974	24.8595	41.1604	10.6138	0.1475	22.3708	40.4092	46.0152	64.5847	24.9942	48.404	54.5832	74.927
0.1485	11.7825	44.3987	29.7643	41.2562	52.7294	32.1099	39.5966	10.4722	0.1485	21.6009	36.7046	38.0115	55.9994	27.0138	42.7095	45.5901	70.8989
0.1495	12.3576	41.0808	25.8839	38.1663	53.3185	34.4501	37.3832	12.651	0.1495	24.1207	35.1583	32.3659	46.6725	32.0521	38.8318	38.4039	68.708
0.1505	14.9908	36.696	20.4811	32.8544	47.6134	31.3835	36.6874	17.8706	0.1505	29.8669	34.5719	31.553	39.6882	37.8109	38.6521	34.1908	66.6372
0.1515	18.5171	31.2647	14.8072	28.2121	38.9139	25.1846	39.071	26.287	0.1515	36.6958	33.816	36.4436	36.9849	41.3373	40.321	31.0854	61.8295
0.1525	21.5477	25.0767	9.83637	26.3419	31.9243	18.7964	43.9924	37.1112	0.1525	42.2845	33.1927	45.1045	38.0545	40.5986	41.2365	27.2022	53.2966
0.1535	23.2599	19.1758	6.36316	26.9757	29.4011	13.8671	49.3594	47.8516	0.1535	46.1398	34.6318	53.5111	39.8524	36.1651	41.0883	22.9386	43.0341
0.1545	23.928	15.6133	5.08067	28.1506	31.4021	10.3859	52.9357	54.9782	0.1545	49.1224	39.5811	57.6898	39.5338	30.6479	41.7072	19.9903	34.5718
0.1555	24.4503	16.0864	6.23221	28.1769	35.9504	7.8523	53.2244	56.3459	0.1555	51.7552	46.7584	56.2822	37.8323	26.4721	44.5047	19.1728	30.1848
0.1565	24.7711	19.9553	9.30917	26.7194	39.9945	6.60268	50.1343	52.7267	0.1565	54.1392	52.6289	51.5053	39.0032	24.5886	48.5696	20.2089	29.36
0.1575	23.3295	24.1068	13.209	24.5102	41.3768	7.84705	45.3493	46.5139	0.1575	56.814	53.6326	47.2678	46.6135	24.7507	51.3728	22.8167	29.9888
0.1585	18.9601	25.3193	16.683	22.7287	40.6975	12.4092	41.4479	39.4948	0.1585	59.9717	47.9263	46.3375	59.3123	26.0843	51.2103	26.4196	30.8366
0.1595	12.8453	22.8445	18.7153	22.4533	40.3696	19.4305	39.9724	32.4308	0.1595	62.0611	36.552	49.0164	71.0714	27.2968	48.5715	29.1681	32.536
0.1605	7.75864	18.5499	18.7377	23.8417	41.3576	26.4221	40.4298	26.2402	0.1605	60.8873	23.5839	53.2324	75.6593	27.097	45.1024	29.0339	36.549
0.1615	5.7749	14.7736	16.8185	25.7443	41.8951	30.8416	41.317	22.337	0.1615	56.2597	14.0459	55.468	71.0481	25.3313	42.3154	26.3292	43.4785
0.1625	7.07247	12.5267	13.7339	26.7947	40.065	31.773	41.6612	21.386	0.1625	50.2244	11.139	52.7717	60.4121	23.7807	41.4866	24.0088	51.6856
0.1635	10.1391	11.5472	10.8884	26.7923	36.5741	30.2055	41.3599	22.3399	0.1635	44.6292	15.2396	45.0004	49.6205	25.0609	43.1371	25.2284	57.2164
0.1645	12.6513	11.2696	9.92504	26.5074	33.8043	28.1303	40.6226	23.3094	0.1645	39.8442	24.5851	35.3107	43.2529	30.2677	45.7471	31.2636	56.5552
0.1655	12.9043	11.3537	11.8038	26.7539	32.7113	27.4677	39.5508	23.2942	0.1655	35.9283	36.4467	27.8878	42.0592	38.0346	46.4351	41.3675	50.6163
0.1665	11.1666	11.7318	15.8877	28.5168	32.0096	29.3055	37.9666	22.8283	0.1665	33.5899	48.3415	24.5537	43.6123	45.978	43.9654	53.372	44.9126
0.1675	9.54225	12.4277	20.2532	33.2934	30.5572	33.5461	35.3218	22.9218	0.1675	33.5767	58.4036	23.6745	45.0192	52.4648	40.2492	64.3358	44.362
0.1685	10.1544	13.209	23.2751	41.7475	29.408	38.9058	31.1398	23.7223	0.1685	36.0049	64.6475	22.7362	45.0692	56.6604	38.495	71.6631	48.3147
0.1695	13.2805	13.569	24.877	51.8222	30.6391	43.1249	26.0007	24.4953	0.1695	40.3875	64.9868	21.287	44.5207	57.7403	40.6424	74.1217	51.3577
0.1705	17.0637	13.2381	26.2389	59.3401	34.4117	43.8653	21.7595	24.7057	0.1705	45.5012	59.0157	20.5607	44.822	55.427	46.3656	71.7866	48.7257
0.1715	19.0598	12.5732	28.4062	61.2631	37.996	40.6056	20.2246	24.5162	0.1715	49.4996	49.261	20.9739	46.2727	51.0291	53.2455	65.6896	40.6736
0.1725	18.3832	12.3016	31.1433	57.8994	38.3453	35.8135	21.7173	24.0286	0.1725	51.2143	40.0666	21.4561	47.2151	46.5884	57.9035	58.2434	32.0912
0.1735	16.4674	13.0774	33.1587	51.6023	35.4053	33.2566	25.0784	22.7451	0.1735	51.3446	35.1883	21.3881	45.4926	43.005	58.1173	53.2875	28.5945
0.1745	15.5255	15.2825	33.5929	44.2964	31.929	34.57	28.6183	20.3863	0.1745	51.3068	35.8808	21.999	40.986	39.9461	54.1839	54.186	32.6898
0.1755	16.2952	18.6561	32.8863	37.0602	30.1064	37.9229	30.8277	17.8865	0.1755	51.0206	40.4304	25.0193	36.2979	37.3269	48.1769	61.0978	42.1262
0.1765	17.7111	21.9001	31.9238	31.119	29.6635	40.284	31.0066	16.9871	0.1765	48.9913	45.6481	30.1831	34.6559	36.0019	42.3141	70.3715	51.117
0.1775	18.6761	23.5096	30.9472	27.8765	29.3234	40.2462	29.9598	18.9223	0.1775	44.6142	49.2967	34.7843	37.4194	36.8884	38.0266	77.0198	54.0852
0.1785	19.266	23.4757	29.7148	27.9414	28.657	38.3104	29.6081	23.5888	0.1785	39.4634	51.0482	36.0103	43.2645	39.5819	35.5837	78.0096	49.8164
0.1795	19.9981	23.4054	28.2818	30.5356	28.1951	35.6054	31.3387	29.3359	0.1795	35.9163	51.349	33.7453	48.9517	42.0648	34.2065	73.6329	42.5317
0.1805	20.8788	24.5269	27.0972	33.647	28.8152	33.2494	34.9292	33.3481	0.1805	34.8936	50.3269	31.2392	51.2733	42.2953	33.1252	66.007	38.3802
0.1815	21.5924	26.3262	26.4033	35.0615	31.0593	32.1487	39.0829	33.2448	0.1815	35.4721	48.3408	33.0313	49.6034	40.1837	32.7846	56.4877	40.377
0.1825	21.991	27.4694	25.7448	34.432	34.085	32.3787	42.1613	29.17	0.1825	36.6447	46.9063	41.5411	46.6163	37.4703	34.4647	45.2804	46.7839
0.1835	22.1074	27.2456	24.1384	34.062	35.5498	32.7612	42.1527	23.842	0.1835	38.513	47.6522	54.7857	45.9827	35.8305	38.1671	33.7142	53.7699
0.1845	22.0053	25.7146	20.8311	36.466	33.6924	31.5043	37.3883	20.1643	0.1845	41.199	49.9539	67.0572	49.3647	35.698	41.2971	25.4868	58.2497
0.1855	21.7022	23.211	16.0312	41.4339	29.4613	27.7193	28.5839	19.1276	0.1855	43.3793	50.6598	72.4956	55.1403	36.3699	40.6244	24.2894	58.5376
0.1865	21.3288	20.3874	10.9698	46.267	25.5831	22.6636	19.5489	19.7608	0.1865	42.8209	47.0471	69.1329	59.2442	36.3868	35.8183	30.3272	54.664
0.1875	21.5201	18.2939	7.36375	48.254	23.5747	19.2467	14.8662	20.2513	0.1875	38.476	39.713	59.9391	58.2676	34.3751	30.0111	39.7776	48.8071
0.1885	23.3612	17.6583	6.84242	46.2725	22.7186	19.7658	16.6889	19.3011	0.1885	31.8943	32.2315	49.9745	53.2024	30.4963	26.6813	47.7728	43.8644
0.1895	27.2826	18.175	10.5253	40.9467	21.906	24.038	23.3739	17.4793	0.1895	26.6954	28.1115	42.6209	49.1533	26.764	27.0266	51.7265	40.9791
0.1905	31.783	18.9418	18.5	34.2557	21.2042	29.6548	30.6171	17.3321	0.1905	26.478	28.0207	38.1699	50.0409	25.5691	30.4767	52.0333	39.2946
0.1915	33.8138	19.7578	29.0282	28.5273	21.0216	33.7109	34.4797	21.1307	0.1915	32.3905	29.6706	34.9208	54.5468	28.1643	36.1242	50.5594	37.7317
0.1925	31.3502	21.6308	38.2894	25.1024	20.7031	34.5091	34.2999	27.9258	0.1925	41.9417	30.192	31.1887	58.3423	34.1783	42.5715	49.1847	35.7355
0.1935	25.7698	25.3547	41.9544	24.0459	18.9601	32.4928	32.7997	33.5479	0.1935	50.6827	28.4111	26.9861	58.9172	41.5002	47.577	49.1679	32.7885
0.1945	21.0494	29.5438	38.3	24.9531	15.4806	29.9374	33.2714	34.4025	0.1945	55.7675	25.1221	23.9629	56.8416	46.8295	49.3966	50.7128	29.0053
0.1955	20.359	31.057	30.0276	27.4778	11.5708	29.4567	36.8754	30.955	0.1955	57.4365	22.1616	23.2318	53.6156	48.0697	48.3443	52.4108	26.0868
0.1965	23.6341	27.8871	22.2321	31.0953	9.35452	32.3715	42.282	26.6057	0.1965	56.9251	21.7927	23.9017	50.3577	46.7199	46.1931	51.4451	26.2393
0.1975	28.1755	21.0711	18.2597	34.8248	10.4646	37.7608	47.0655	23.5669	0.1975	54.2915	26.0672	24.7855	48.0033	46.4035	44.5659	45.5535	29.8915
0.1985	30.9446	13.5739	17.7469	37.3007	15.1306	42.4829	49.364	21.0633	0.1985	49.0659	35.4568	26.7952	46.7673	48.744	44.5705	35.5064	35.2875
0.1995	30.4718	8.04871	18.3485	37.1758	22.0795	42.8734	48.9557	17.3726	0.1995	42.124	47.7761	32.0277	45.3084	52.1778	46.6776	25.2221	40.2548
0.2005	27.4447	5.81715	18.4298	33.9595	29.3047	37.5625	47.3113	12.3392	0.2005	36.259	58.7533	40.6464	41.8179	54.565	49.7286	19.002	43.6654
0.2015	23.9151	7.13658	17.8977	28.629	35.0829	28.5267	46.5335	7.49324	0.2015	34.6735	64.1362	50.2161	36.3621	55.0469	51.4756	18.6056	45.2544
0.2025	21.7247	11.8745	17.3234	23.1807	38.4347	19.0898	47.6095	4.54937	0.2025	38.2575	62.0466	58.2838	31.5023	53.6678	51.5991	22.8352	44.8223
0.2035	21.2942	19.9439	17.099	19.4144	38.8961	11.551	49.5506	4.33895	0.2035	44.1626	54.1715	64.0571	30.3439	51.2878	52.7719	29.3777	42.3179
0.2045	21.6314	31.0137	17.3234	17.9593	36.3706	6.85238	50.791	6.64823	0.2045	47.6755	44.78	67.1522	34.355	49.5434	56.9939	36.7196	38.7272
0.2055	21.4687	43.4162	17.8932	18.0272	31.5054	5.4895	51.2467	10.2981	0.2055	45.8099	37.9199	66.3591	42.899	49.2708	61.9227	44.3374	35.9305
0.2065	20.4833	53.6227	18.403	18.032	25.8632	7.86829	51.9665	13.5098	0.2065	39.0033	35.0314	60.7375	54.0354	49.3785	62.6364	51.394	35.0077
0.2075	19.2392	57.8294	18.2154	16.8666	21.0643	13.6332	53.0355	14.9913	0.2075	30.1254	34.9304	51.291	65.1393	48.1546	56.5256	55.7382	35.3826
0.2085	18.0554	54.5907	17.2365	14.6993	17.6865	20.8882	53.2624	14.9511	0.2085	22.6877	35.6395	41.2075	73.2538	45.2483	45.4181	54.8316	36.2217
0.2095	16.6254	45.7547	16.7521	12.6151	15.2756	26.7569	52.0191	14.7363	0.2095	19.324	36.1457	34.8219	76.0339	42.3134	33.7207	48.0867	37.8609
0.2105	14.8247	34.8816	18.8146	12.011	13.4757	29.4115	50.1552	15.546	0.2105	20.6542	36.7528	35.8863	73.2083	42.2347	25.3154	38.0155	41.2006
0.2115	13.1115	25.0114	24.1205	14.193	13.0963	29.3897	48.5517	17.9337	0.2115	25.4473	37.9885	45.3264	67.0381	47.0856	21.49	28.5363	46.1449
0.2125	11.9144	17.5276	30.5994	19.4609	15.9692	28.6336	46.5121	22.1435	0.2125	31.9958	39.4958	59.4952	60.8011	55.6886	20.9509	22.3008	50.9449
0.2135	11.2002	12.3287	34.5363	26.1636	23.3925	28.6795	42.5416	27.8958	0.2135	38.8913	40.3125	71.3086	56.1891	63.3592	21.6573	19.8731	52.8484
0.2145	10.7089	8.82483	33.2666	31.4599	34.4458	30.0138	36.4718	33.5957	0.2145	44.6081	40.0361	75.0804	52.1419	65.3803	22.2713	20.838	49.8594
0.2155	10.3949	6.82619	27.0754	33.6058	45.7649	32.4647	29.7569	36.6409	0.2155	47.4918	39.2407	71.055	46.5798	61.1513	22.0302	24.7652	42.4842
0.2165	10.819	6.36724	18.9565	33.1283	53.0514	35.4505	23.7728	35.3219	0.2165	46.8315	38.7121	64.5507	39.288	54.2736	20.546	30.8469	33.6907
0.2175	12.9865	6.91654	12.6512	31.4754	53.1688	38.0836	18.832	30.33	0.2175	43.7204	38.5793	60.3827	32.6409	48.5219	18.4082	37.0332	27.1506
0.2185	17.1545	7.47627	10.5231	29.2684	45.8705	39.7328	14.8431	24.2111	0.2185	40.7237	38.8937	58.6165	29.3559	44.6213	17.362	40.3186	25.4655
0.2195	21.8262	7.80643	12.6722	26.5218	34.2541	40.4254	12.1908	19.4792	0.2195	40.2671	41.1344	55.7436	29.8199	41.1798	19.1368	38.6548	29.0914
0.2205	24.7022	9.27173	17.3392	23.7937	22.9975	40.2316	11.5306	17.2223	0.2205	42.6828	47.4669	49.1725	31.8854	37.7731	23.8163	32.9684	35.6971
0.2215	24.8595	13.864	21.7853	21.9674	15.2707	38.6912	12.7511	17.1514	0.2215	45.9639	57.1991	39.7415	32.914	36.1861	29.2123	26.9655	41.0243
0.2225	23.4648	21.9395	23.4397	21.3102	11.378	35.5958	14.5551	18.5536	0.2225	47.8599	65.4064	30.177	31.7254	38.3469	32.2804	24.605	41.988
0.2235	22.2853	30.8103	21.4222	21.6014	10.2785	32.1543	15.5857	20.8392	0.2235	47.7043	66.9662	22.4626	29.145	43.3854	31.8121	27.6037	39.2776
0.2245	22.1548	36.0866	17.5354	22.5177	11.3963	30.6549	15.9024	23.3854	0.2245	45.9132	61.4291	17.1717	27.1734	47.4031	29.5644	34.7366	36.236
0.2255	23.0834	35.097	15.1352	23.1141	14.3568	32.6681	16.7886	25.4518	0.2255	42.8549	52.951	14.2509	27.0453	46.5346	28.1613	42.4543	35.5075
0.2265	25.1165	29.0831	16.2217	21.9776	17.8415	37.5744	19.1323	26.5039	0.2265	39.0978	46.0919	13.6247	27.8033	40.2283	28.5111	46.5744	37.3985
0.2275	28.3012	21.8961	19.4828	18.9111	19.9764	42.6451	22.5335	26.3366	0.2275	36.1243	42.2588	15.4149	27.4762	31.7098	30.0862	45.4017	40.7259
0.2285	31.8492	16.8655	21.6554	15.7684	20.1513	44.6897	26.1004	24.8099	0.2285	35.7903	39.4651	19.7127	25.881	25.5963	32.6484	41.8683	44.4442
0.2295	33.965	15.0536	21.0617	14.8912	19.8974	42.2433	29.629	21.9738	0.2295	38.9065	35.0109	25.7967	25.4805	25.0931	36.1855	41.1323	48.55
0.2305	33.0847	15.6831	19.2405	17.339	21.5371	36.7006	33.5741	18.5984	0.2305	44.4283	28.6925	31.893	28.908	30.7814	39.5929	45.4697	53.424
0.2315	29.5735	17.2326	18.6999	22.8887	26.0221	31.3689	38.0478	16.1712	0.2315	49.9124	23.3378	36.4566	35.8657	40.8298	40.9017	52.5888	57.9471
0.2325	25.9166	18.3241	19.9099	30.8495	32.0652	29.1119	42.3515	16.1156	0.2325	52.8371	22.0812	39.5223	43.1155	51.8817	39.2069	58.8339	59.0924
0.2335	24.6501	18.6327	21.3677	40.1277	36.8988	30.2738	45.3218	18.9534	0.2335	52.0027	25.5535	41.9492	47.8841	60.5496	36.1314	62.2579	54.7108
0.2345	26.2998	19.1297	22.0626	48.7776	37.878	32.5168	45.5476	23.9267	0.2345	48.1724	31.9067	43.5016	50.7661	64.9892	35.2375	62.3712	46.2482
0.2355	29.9166	20.9081	22.6197	54.166	34.4277	32.888	41.7828	29.019	0.2355	43.5685	38.7434	43.0972	54.4528	65.3618	39.3971	59.1976	37.5004
0.2365	34.8	23.7497	23.7689	54.4795	29.1988	30.1407	34.4669	31.6699	0.2365	40.4863	44.5907	41.3949	60.188	63.2236	47.9663	53.9813	31.0368
0.2375	40.032	26.0574	24.6923	50.5691	26.6717	25.2346	26.8628	30.3943	0.2375	39.6872	49.0718	41.4312	66.7655	60.4817	56.5045	49.2078	26.7234
0.2385	42.7895	26.0744	23.7721	45.5776	29.8305	20.265	23.3548	26.1112	0.2385	39.827	52.2256	45.2631	72.4694	57.9572	59.8783	46.3254	23.2108
0.2395	39.6597	23.2221	20.5481	41.9465	38.1447	17.2815	25.7189	21.4718	0.2395	38.8868	53.7727	50.6631	75.989	54.4563	56.1606	44.0024	19.8815
0.2405	30.4388	18.656	16.2843	39.5614	48.6211	17.5366	31.2908	18.5692	0.2405	36.5083	53.1791	52.6102	75.4022	48.1069	47.9255	39.7905	17.3408
0.2415	19.0583	14.5566	12.9183	37.3537	58.2343	21.0168	35.3227	17.457	0.2415	34.5262	50.5559	48.2634	68.6836	39.1832	40.1421	33.5771	16.7051
0.2425	10.2545	12.5838	11.7993	35.3723	65.4815	26.422	35.43	17.0776	0.2425	34.6885	47.1936	39.4978	56.4218	30.9158	36.5141	28.5391	18.5547
0.2435	6.32344	12.9162	12.8653	34.2453	70.5258	31.8776	33.3902	17.074	0.2435	36.2126	44.89	30.3165	42.5642	27.0042	37.0479	27.9926	22.1477
0.2445	6.93067	14.5471	14.7118	33.4988	74.2436	36.032	32.3176	17.985	0.2445	36.5067	44.7789	22.9069	31.2648	28.7182	38.8353	31.6966	25.567
0.2455	10.4504	15.9208	15.8867	31.3968	76.735	38.4895	32.6548	19.9096	0.2455	34.2316	46.6745	16.8941	23.7521	34.2005	39.0871	36.0602	26.7596
0.2465	14.7653	15.4861	16.1685	26.4938	76.3742	39.0889	31.6984	21.7771	0.2465	30.4772	49.0743	11.4173	18.7593	39.6059	37.1409	37.7171	24.6525
0.2475	17.6103	12.64	16.1069	19.1652	70.5858	37.1321	26.9397	22.0025	0.2475	26.7312	49.5175	6.62023	14.8	40.9816	33.6943	35.9521	19.623
0.2485	17.3312	8.35798	15.5778	11.4971	58.2654	31.943	18.9862	19.5783	0.2485	22.932	45.527	3.15586	11.1668	36.3409	29.005	31.6768	13.2537
0.2495	13.8944	4.39119	13.709	5.59775	41.632	24.0835	10.8223	14.811	0.2495	18.1818	36.4022	1.20878	7.70337	26.9276	22.7831	25.5754	7.45746
[truncated: 27 more columns]
