# Supplementary material for: Integration of locomotion and auditory signals in the mouse inferior colliculus
Source: eLife. 2020 Jan 28;9:e52228. doi: 10.7554/eLife.52228 (PMC7004561; doi:10.7554/eLife.52228)
Supplement: Figure 4—source data 1. [file elife-52228-fig4-data1.xlsx]

## Sheet: Sheet1
Figure 4A													Figure 4B													Figure 4C												Figure 4D				Figure 4E				Figure 4F
time	firing rate (Hz)												time	firing rate (Hz)												time	firing rate (Hz)											Freq. (kHz)	Evoked rate (Hz)			Freq. (kHz)	Evoked rate (Hz)			Freq. (kHz)	Evoked rate (Hz)
(sec)	4 kHz		5.7 kHz		8 kHz		11.3 kHz		16 kHz		22.6 kHz		(sec)	5.7 kHz		8 kHz		11.3 kHz		16 kHz		22.6 kHz		32 kHz		(sec)	4 kHz		8 kHz		16 kHz		32 kHz		64 kHz				stationary	walking			stationary	walking			stationary	walking
	stationary	walking	stationary	walking	stationary	walking	stationary	walking	stationary	walking	stationary	walking		stationary	walking	stationary	walking	stationary	walking	stationary	walking	stationary	walking	stationary	walking		stationary	walking	stationary	walking	stationary	walking	stationary	walking	stationary	walking		2	-1.0526	-23.4127		4	16.6788	5.1333		4	-0.5859	-0.2778
-0.0995	12.5618	43.7672	23.7759	35.4075	21.3628	41.5196	28.2071	57.8584	34.2032	42.5047	23.891	31.2249	-0.0995	9.75169	31.5908	9.2612	13.7896	7.93725	25.2676	15.1895	23.1272	12.5931	35.665	12.0018	12.2783	-0.0995	2.52575	0.0912948	5.94813	13.1184	1.03855	1.31508	2.41121	1.23457	4.76863	5.96885		2.8	3.7662	-12.0513		5.7	45.4167	1.0937		8	28.7712	3.3509
-0.0985	18.4841	61.9644	31.6481	39.8898	26.885	55.7408	33.6019	72.6068	39.4289	51.1901	33.6682	41.7388	-0.0985	9.56527	37.7434	9.201	13.8223	5.91885	29.3054	14.6962	20.5216	11.7509	30.9338	11.2753	9.6375	-0.0985	3.39254	0.281208	6.25565	11.3574	1.62935	0.70464	1.48108	0.660816	4.80285	5.68496		4	5.0901	-7.3643		8	93.2051	22.5		16	4.0533	0.1993
-0.0975	26.2095	76.2465	36.3537	39.0906	31.188	66.0249	34.4977	80.2983	40.616	56.8709	40.3928	54.3298	-0.0975	8.94391	42.0799	8.98881	15.4183	5.08987	30.9302	13.2008	20.0124	11.3517	24.2118	10.4738	9.12563	-0.0975	4.44068	0.674583	5.80165	8.82012	2.14261	0.298177	0.729359	0.275469	4.75057	4.50661		5.7	73.8272	5.8772		11.3	38.7913	2.8571		32	2.5722	0.2721
-0.0965	34.7187	82.3636	37.551	36.627	34.2959	71.9925	32.7149	79.6704	39.1621	60.8782	43.1601	70.3174	-0.0965	8.40476	42.9611	8.67127	18.7177	5.69046	29.6369	11.2959	20.5156	11.5154	19.3444	9.88972	10.6928	-0.0965	5.35574	1.26029	4.86567	6.20225	2.50297	0.119351	0.299552	0.0901145	4.49138	2.90226		8	127.056	55.4955		16	142.672	118.677		64	-1.4146	-0.1971
-0.0955	41.1802	80.1884	36.6118	38.0018	36.028	75.7654	31.2787	72.3778	37.0748	63.7033	43.4398	87.3396	-0.0955	8.37792	40.8411	8.18089	23.0897	7.10654	27.7834	10.0095	20.6033	11.7515	18.5362	9.82229	13.1234	-0.0955	5.84982	1.83371	3.82317	4.10954	2.82022	0.119351	0.155469	0.0270644	3.86623	1.51617		11.3	246.447	148.618		22.6	99.1221	54.5238
-0.0945	42.8082	73.8943	35.3322	47.2164	36.298	79.7213	31.6221	62.4069	36.1049	64.9319	43.101	99.3695	-0.0945	8.78609	37.8422	7.53121	27.2391	8.514	28.2139	9.97351	19.829	11.4191	20.6174	10.1677	14.2293	-0.0945	5.76176	2.07786	3.02738	2.96043	3.34997	0.298177	0.233978	0.0270644	2.97566	0.722453		16	125.94	81.626		32	29.9231	24.7126
-0.0935	39.18	68.5267	34.8825	64.0655	35.7427	84.8032	33.1268	53.7723	37.1777	65.047	42.6782	101.39	-0.0935	9.14748	35.2146	6.93282	29.3904	9.55044	30.9988	10.768	18.5064	10.483	22.5661	10.3765	12.9046	-0.0935	5.23966	1.83371	2.77597	2.88079	4.36236	0.70464	0.517846	0.0901145	2.20217	0.577691		22.6	-18.1735	-58.6364		45.2	41.7593	39.7967
-0.0925	32.5665	66.4396	35.4136	83.3615	35.5645	90.2407	34.8445	48.2785	40.0089	65.7899	41.8432	93.5769	-0.0925	9.09783	32.4463	6.59535	28.0695	10.3375	33.225	11.2306	17.2428	9.57718	22.1945	9.84171	10.5705	-0.0925	4.72352	1.26029	3.23738	3.56942	5.86808	1.31581	0.974596	0.275469	1.88482	1.035		32	-26.1905	-25.0476		64	-0.0904	-13.7037
-0.0915	26.4344	66.6675	36.2609	97.309	36.5362	93.8143	36.7691	45.8433	43.333	68.0329	41.0467	80.4263	-0.0915	8.69836	29.2441	6.47889	23.3383	11.0127	32.1672	10.5399	17.0384	9.28909	19.3097	8.39434	10.1099	-0.0915	4.59499	0.674583	4.36885	4.40903	7.32436	1.91818	1.476	0.660816	2.03261	2.00667		45.2	-2.7632	6.4957
-0.0905	23.8652	67.098	36.7261	100.331	38.1704	92.8325	39.3645	46.3549	45.6254	70.1111	41.7309	66.8619	-0.0905	8.17144	26.8767	6.40657	17.1684	11.4847	28.1633	8.9783	18.8855	9.5641	15.0375	6.4761	13.4242	-0.0905	4.82003	0.281208	5.89412	4.93663	7.82342	2.19229	1.86969	1.23525	2.40556	3.19524		64	0.8861	16.6667
-0.0895	26.6356	66.8561	36.8161	92.8867	39.0713	86.4961	42.5562	50.0037	45.8809	69.3715	44.482	56.0875	-0.0895	7.54649	26.653	6.4087	12.0531	11.6903	24.2083	7.59719	22.6584	9.90357	10.8411	4.85571	20.0268	-0.0895	5.03768	0.0912948	7.31283	5.2618	6.85921	2.0087	2.17761	1.80074	2.81935	4.03775
-0.0885	34.4945	66.7463	37.1628	81.1299	38.2932	78.0086	45.6106	55.8558	44.209	65.3845	47.5908	50.1136	-0.0885	6.79242	27.8866	6.80844	9.05734	11.8555	23.0779	7.25924	26.793	10.0122	7.99013	4.10636	27.6865	-0.0885	5.01563	0.02378	8.02408	5.87732	4.84833	1.60924	2.62833	2.05875	3.27551	4.03775
-0.0875	44.6179	68.0573	38.2358	72.6294	36.3	73.1358	47.8116	61.4724	41.6766	60.8746	48.303	50.2589	-0.0875	6.16817	28.2189	7.92853	7.51909	12.2862	25.0068	8.02472	29.5124	10.0671	7.04157	4.2374	34.1048	-0.0875	4.87846	0.0090906	7.68695	6.9785	2.74509	1.41257	3.36204	1.89153	3.80421	3.1938
-0.0865	52.3887	71.2473	39.7927	71.333	34.5263	75.0359	49.0168	64.5907	39.0951	59.1034	45.501	56.082	-0.0865	6.16085	25.8898	9.76079	6.62635	12.9778	27.8621	9.26816	30.1278	10.3985	7.34825	4.80252	37.7623	-0.0865	4.85567	0.02378	6.55394	8.07262	1.25436	1.6326	4.13997	1.54155	4.29498	1.99728		Figure 4G			Figure 4H			Figure 4I					Figure 4J
-0.0855	54.0966	75.1923	41.2498	75.4801	34.0905	80.4654	49.4925	64.6942	36.1769	60.7395	40.5968	64.5951	-0.0855	7.00989	21.2383	11.8609	6.90921	13.5871	29.0788	10.2456	28.9537	11.1168	7.45508	5.37945	37.7296	-0.0855	4.98297	0.0912948	5.34891	8.37002	0.515224	2.10396	4.48434	1.45629	4.55007	0.986623		Evoked rate (Hz)			Modulation(%)	N		Modulation (%)					Modulation (%)
-0.0845	49.6554	77.4381	42.3979	80.1335	35.072	82.3378	49.2414	62.8138	32.3685	63.4012	35.8447	72.2417	-0.0845	8.36693	16.1122	13.4739	9.89087	13.8701	27.3956	10.5844	26.4452	12.0751	6.3733	5.86606	33.9603	-0.0845	5.14858	0.281208	4.71846	7.54218	0.350273	2.48572	4.1569	1.96505	4.50861	0.384519		stationary	walking		-230	0		Stronger	Weaker	BF	non-BF		onset type
-0.0835	42.5685	76.286	43.285	82.0632	36.8652	76.7086	47.9877	60.5166	28.1937	63.7488	32.4969	78.2446	-0.0835	9.49225	12.4499	13.8733	16.2267	14.0612	23.3423	10.2882	22.9932	12.9977	4.36773	6.29592	28.0535	-0.0835	5.23612	0.674583	4.76456	5.96384	0.586296	2.62209	3.43105	3.10192	4.36474	0.118067		32.8378	-2.13098		-210	0		-6.0049	-58.9905	-39.9683	-106.489		-6.0049
-0.0825	36.9621	72.9589	43.5135	82.221	38.7905	66.7778	46.4242	59.1137	25.2038	59.904	30.9209	84.9879	-0.0825	9.82094	11.3955	12.8525	24.2621	14.6615	18.5417	9.4261	19.3939	13.5398	2.47353	6.59926	22.671	-0.0825	5.09617	1.26029	5.06735	4.24234	1.13551	2.63089	2.84142	4.63688	4.37659	0.0285195		81.997	49.2242		-190	0		-84.6031	-53.8151	25.9187	-102.293		-84.6031
-0.0815	34.5741	70.4052	42.3751	83.4777	40.2128	60.0091	46.857	59.1224	24.7407	52.8781	31.5887	94.4609	-0.0815	9.3404	12.8765	10.9517	30.9197	15.8756	14.3898	8.04144	16.8606	13.3504	1.59016	6.74486	19.5488	-0.0815	4.55945	1.83371	5.13091	2.75357	1.93558	2.61734	2.69149	6.15558	4.56308	0.00541145		202.391	254.848		-170	0		-7.7937	1.7942	-71.2485	-131.658		1.7942
-0.0805	34.4324	69.8452	39.8937	86.8954	40.5253	61.9341	51.2055	60.0334	26.9824	46.4445	34.6242	105.213	-0.0805	8.48356	15.6828	9.09369	34.3872	17.3611	11.2981	6.35686	16.2258	12.2539	2.24129	6.99927	18.1892	-0.0805	3.62773	2.07786	4.81444	1.65636	2.95456	2.46164	2.84323	7.13874	4.70328	0.00071953		67.1014	-1.53846		-150	0		57.7072	-8.1986	9.0073	-78.2564		-30.6349
-0.0795	34.8766	69.9934	37.1697	91.243	39.4585	72.3724	58.2475	60.6959	31.0384	44.7789	38.3791	113.268	-0.0795	7.80597	18.3809	7.99098	35.3723	18.4042	9.34854	4.83315	17.3689	10.4689	4.70724	7.79547	16.6325	-0.0795	2.59334	1.83371	4.34737	1.08319	4.22588	2.0087	2.9491	7.18951	4.61232	0		64.3548	29.7222		-130	3		-30.6349	-77.776	9.8092	-19.7306		-121.478
-0.0785	35.2375	69.5342	35.3798	95.2502	37.4494	85.9114	63.9899	60.206	35.7248	48.8429	39.7995	115.031	-0.0785	7.73348	20.3362	7.89004	35.3811	18.2225	9.37998	3.92151	19.5471	8.63227	8.67313	9.31208	13.6629	-0.0785	1.9326	1.26029	3.985	1.16414	5.74133	1.33917	2.83027	6.34162	4.27615	0		129.848	37.3333		-110	1		-12.5197	-77.6995	-24.6583	-38.6603		-73.4898
-0.0775	35.6233	68.5971	34.8665	98.6024	35.7115	95.2548	65.1936	58.7576	40.211	55.1744	37.1788	109.208	-0.0775	8.42486	21.6697	8.65868	34.7546	16.3608	12.713	3.84268	22.1152	7.49803	12.6579	11.2187	10.2799	-0.0775	2.07761	0.674583	3.78183	1.93626	7.27998	0.708655	2.64389	5.03827	3.73443	0.00071953		36.8519	-11.6667		-90	4		-5.3876	-121.478	-113.938	-163.042		-42.6084
-0.0765	36.0246	67.8097	35.4706	100.754	35.736	95.5784	61.9186	57.6281	44.2344	59.2452	32.1195	97.5017	-0.0765	9.73449	22.4419	9.96175	33.0975	13.0674	19.5035	4.60939	24.7995	7.54767	14.5768	12.7766	8.94203	-0.0765	3.14836	0.281208	3.71989	3.24041	8.47447	0.294162	2.71822	3.7446	2.99826	0.00469192		19.961	20.3191		-70	9		-25.8558	-73.4898	-8.9331	-3.381		-94.7725
-0.0755	36.197	67.4199	37.1235	100.309	38.214	87.4774	56.6486	57.7322	48.0677	59.9723	28.2422	83.9616	-0.0755	11.2731	22.259	11.4225	30.9079	9.28761	27.6318	6.10989	27.4175	8.84006	13.6197	13.1926	11.4505	-0.0755	4.71969	0.0912948	3.88224	4.65673	9.0787	0.0952642	3.21672	2.71657	2.13805	0.0245471		33.2153	7.22222		-50	8		-33.0258	22.1686	-6.4628	-54.0095		-32.7403
-0.0745	36.0018	67.5442	39.6067	96.4153	42.2749	75.879	51.7761	57.9513	52.005	60.0299	28.2225	72.4011	-0.0745	12.5288	20.71	12.6852	29.8417	6.19366	33.6478	8.11617	29.5178	11.0624	11.2834	12.083	17.2887	-0.0745	5.90354	0.0230829	4.33172	5.58765	9.07555	0.0240866	3.97881	2.09754	1.35812	0.0989318		139.304	151.852		-30	13		-22.4096	-74.8971	-60.2711	-122.939		-22.4096
-0.0735	35.468	68.2433	42.1907	90.2385	46.0569	65.6393	48.3061	56.0566	55.3739	61.9002	31.9774	64.196	-0.0735	13.0505	18.0209	13.3298	31.1259	4.62152	35.1295	10.3395	30.501	13.5924	9.98997	9.80116	23.5266	-0.0735	5.94264	0.0045453	4.85431	5.5886	8.52299	0.00474292	4.7078	1.94506	0.922586	0.315546		99.3678	79.6561		-10	20		-6.6969	-42.6084	-7.3254	-73.0674		-60.397
-0.0725	34.6776	69.0358	44.1752	84.3084	48.1525	58.5835	46.3119	52.0916	56.5865	64.8716	36.9451	59.3288	-0.0725	12.6363	15.111	12.9032	33.7914	4.74644	32.327	12.5046	30.1629	15.6525	10.8435	7.34493	26.6846	-0.0725	4.86973	0.000697045	5.01473	4.76483	7.41452	0.0014547	5.22288	2.08134	1.0171	0.799967		93.0479	74.7949		10	4		-20.8112	-94.7725	-63.2856	-153.989		-88.3534
-0.0715	33.7315	68.7379	45.5625	80.377	48.456	54.7906	45.5982	49.6296	54.9233	66.2275	39.9445	58.5961	-0.0715	11.3995	12.9376	11.3193	34.9388	6.09816	27.894	14.2973	28.9813	16.6643	13.0508	5.83561	25.6617	-0.0715	3.47671	0	4.5892	3.80172	5.79182	0.00474292	5.44446	2.12625	1.63878	1.63887		123.221	135.308		30	2		-13.057	-32.7403	-34.0883	-31.4374		-48.0317
-0.0705	32.7477	66.4685	46.7265	78.1826	47.8461	54.9501	45.6735	52.4837	51.7545	64.2379	39.3476	62.9991	-0.0705	9.72261	11.965	9.14953	32.3318	7.8672	25.1677	15.337	27.5196	16.5432	15.1243	5.98008	22.9776	-0.0705	2.58981	0	3.8666	3.43418	3.96218	0.0240866	5.27846	1.8189	2.51884	2.77768		131.695	207.692		50	1		-3.6975	-60.397	-6.4321	-31.6059		-13.057
-0.0695	31.8603	63.0587	47.4617	76.1192	47.3213	59.8114	45.9333	60.8291	49.2789	59.4867	35.7987	71.1935	-0.0695	8.18548	12.1452	7.24696	26.6629	9.30381	25.9395	15.4081	25.7608	15.7322	16.1102	7.81228	22.3989	-0.0695	2.44049	0.000697045	3.39952	3.81048	2.47039	0.0952642	4.70093	1.23902	3.17784	4.02639		69.8023	15.5128		70	0		-24.2717	-88.3534	-8.3107	-5.7501		-26.1053
-0.0685	31.1902	60.8537	46.7508	72.5973	47.3465	68.0947	46.4537	71.1207	48.4689	54.2646	31.2341	79.1158	-0.0685	7.36463	13.0402	6.13485	20.7892	9.98794	29.0781	14.7523	23.5982	15.0656	15.8605	10.6133	24.988	-0.0685	2.67859	0.0045453	3.44385	4.42601	1.79366	0.293434	3.88833	0.661498	3.23032	5.1784		27.7593	6.19048		90	0		-26.1053	-48.0317	-51.2071	-36.0622		-72.6282
-0.0675	30.7694	61.536	43.7046	66.9583	47.7692	76.4771	48.0192	78.9601	48.626	51.5678	27.6872	82.7759	-0.0675	7.48317	13.9955	5.89746	16.8685	9.88557	31.5837	13.9803	21.6748	15.4362	14.7532	12.9978	27.9664	-0.0675	2.80984	0.0230829	3.7329	4.68178	2.0662	0.703912	3.08557	0.275469	2.72708	6.04843		172.824	130.208		110	0		-39.933	14.4157	-13.8619	-39.466		-108.856
-0.0665	30.5973	64.4179	38.739	60.3163	48.299	81.9835	50.8967	81.5733	48.3396	53.9438	26.5359	81.3969	-0.0665	8.23562	14.5015	6.45212	14.6616	9.28957	31.4576	13.6285	20.9045	17.2138	13.3945	13.5399	27.9177	-0.0665	2.58335	0.0912948	3.82899	4.41	3.0044	1.31508	2.38358	0.0901145	2.12739	6.37961		128.705	78.9474		130	0		-46.9443	-14.1932	-26.9274	-4.2517		-47.9929
-0.0655	30.8935	67.1624	33.6979	55.9227	48.938	83.8247	54.0462	79.0151	46.4832	61.9122	27.7181	77.9527	-0.0655	9.03813	14.5716	7.64457	12.6314	8.72668	29.2241	13.8701	21.3168	19.803	12.3	11.8933	24.7645	-0.0655	2.11048	0.281905	3.57347	3.81495	4.01496	1.91343	1.75467	0.0270644	1.88116	5.90482		20.1783	-2.8125		150	0		-8.3929	-72.6282	3.8981	-27.128		-68.9957
-0.0645	32.128	68.2756	30.6781	57.2083	49.7681	82.6895	55.9615	73.9984	42.7088	72.9513	29.648	76.4565	-0.0645	9.48876	14.9395	9.07213	10.1788	8.7618	26.6169	14.5728	22.1614	21.9219	11.8221	9.31054	21.7702	-0.0645	1.73053	0.679128	3.11148	3.09421	4.49054	2.1682	1.25512	0.0270644	2.08764	4.67054		3.66058	-2.30769		170	0		-39.9873	-108.856	-22.1332	-27.3037		-49.1311
-0.0635	34.3774	69.071	30.5498	63.9287	50.4285	79.0144	56.1156	69.7714	37.6375	82.6154	30.6204	78.1262	-0.0635	9.59675	16.8201	10.0316	8.39093	9.67174	24.6039	15.3856	23.0196	22.5596	12.5244	7.69417	21.6754	-0.0635	1.73053	1.28337	2.63652	2.34961	4.20621	1.91343	1.04178	0.0901145	2.57683	3.20699		157.972	138.194		190	0		-2.7454	-47.9929	-7.3182	-34.5432		-15.4741
-0.0625	36.6844	72.4269	32.3243	70.9502	50.0569	72.8623	55.4066	67.3949	32.8095	87.555	30.4763	80.2809	-0.0625	9.59766	20.9251	9.92123	8.77022	11.2303	22.9032	15.8101	24.2323	21.7011	15.2739	8.05878	23.7182	-0.0625	2.10996	1.9257	2.33041	1.78888	3.48246	1.31508	1.17262	0.275469	3.21034	2.19265		55.4032	14.6875		210	0		-11.8141	-68.9957	-87.069	-67.751		-74.0706
-0.0615	37.6395	78.7766	33.7905	72.4017	47.8898	65.2926	55.2492	65.6411	30.1185	87.8328	30.8932	79.5481	-0.0615	9.63828	26.3338	8.76441	11.7007	12.8865	20.6265	15.47	26.3638	20.1139	20.4914	9.92224	24.7563	-0.0615	2.5789	2.36361	2.46469	1.76771	2.88581	0.703912	1.47309	0.660816	3.9743	1.92987		46.4667	56.7677		230	0		-2.2606	24.6095	-19.723	-44.6657		3.5952
-0.0605	36.8527	84.3029	33.122	66.9319	43.9405	58.602	56.2709	63.4525	30.655	86.1172	34.0894	75.8259	-0.0605	9.68513	30.7367	7.17423	16.2305	14.2029	17.1929	14.3961	29.5	18.5613	27.4852	11.9574	22.5655	-0.0605	2.78623	2.53137	3.25241	2.52887	2.73106	0.293434	1.65713	1.23457	4.80734	2.18027		12.9253	-59.4624		250	0		-49.1311	-99.5996	-16.8186	-58.7232		-19.6246
-0.0595	35.4837	84.4153	30.4393	57.9954	39.0727	54.6503	57.8879	61.3224	33.8369	84.611	40.9081	72.2104	-0.0595	9.64848	32.2734	5.78564	20.9509	15.0981	13.1826	12.9435	32.8205	17.2239	34.626	13.0455	17.4948	-0.0595	2.5789	2.61187	4.50836	3.9012	2.87153	0.0952642	1.60211	1.79697	5.48946	2.48354		533.298	516.34					-15.4741	-65.4325	-10.5039	-4.7408		-38.8521
-0.0585	35.1651	78.5182	27.8797	49.8455	34.4706	53.7629	58.7607	60.1879	37.8242	83.0163	49.7939	71.3216	-0.0585	9.43378	30.9401	4.9206	24.6342	15.7859	10.3054	11.462	34.6485	15.6971	39.7323	12.8882	11.502	-0.0585	2.10996	2.7895	5.64552	5.24962	2.92912	0.0240866	1.46311	2.03991	5.75508	2.59858		521.378	508.611					-14.2472	-123.38	-28.8348	-42.8642		-15.9904
-0.0575	36.6353	70.4872	27.8442	44.6448	31.1029	55.8613	57.3473	60.3238	40.8863	79.783	57.8078	72.6209	-0.0575	8.94507	27.9841	4.75503	26.1927	16.5613	10.0056	10.1479	33.3745	13.5451	40.8336	11.9438	6.48882	-0.0575	1.73053	3.03365	6.17947	5.81034	2.67329	0.00474292	1.46311	1.8189	5.47624	2.60332		610.39	555.863					3.5952	-74.0706	-3.3613	-2.5159		-35.1218
-0.0565	39.4197	65.0629	31.0283	42.7247	29.5188	61.5742	52.5691	61.381	42.4867	75.1883	62.594	73.2222	-0.0565	8.21163	24.2869	5.42658	24.8941	17.4561	11.9031	9.1553	28.8359	10.9669	37.8577	10.915	3.51838	-0.0565	1.73053	3.18529	6.1544	5.2277	2.21647	0.000727351	1.60211	1.324	4.75057	2.5892		23.8473	17.1069					-19.6246	-38.8521	-14.3957	-8.81		-48.2533
-0.0555	42.3625	64.3483	36.0437	43.7008	29.6904	70.7239	44.877	62.4152	43.2497	72.1552	63.1673	70.709	-0.0555	7.52642	19.8174	6.78465	21.1346	17.9486	13.808	8.70393	22.6857	8.82459	33.3019	10.2652	2.96056	-0.0555	2.10943	3.11708	5.93888	3.81284	1.91952	0.000727351	1.65713	0.936967	3.81799	2.43517		1.08527	59.2593					-15.9904	-35.1218	-66.7391	-72.8496		-23.1676
-0.0545	44.0406	66.8339	40.5991	46.6703	30.8565	79.9894	36.6976	62.0093	44.0709	73.147	59.7258	65.2311	-0.0545	7.38366	14.6545	8.28099	16.5196	17.2579	13.5214	9.00053	17.1995	7.84152	29.903	10.1146	4.80774	-0.0545	2.57601	2.75699	5.71064	2.26273	2.08115	0.00474292	1.47309	0.940737	2.87978	1.9871		33.1106	11.8056					-23.1676	-48.2533	-5.0977	-1.3548		13.7091
-0.0535	43.1471	69.1777	42.8418	50.2419	31.8259	84.0246	31.0663	59.3593	45.3044	77.0213	53.8706	59.5422	-0.0535	8.18003	9.9845	9.38844	12.7076	15.2334	10.7099	10.033	13.9145	7.88821	28.0129	10.3873	8.47705	-0.0535	2.7718	2.11561	5.33238	1.15036	2.64534	0.0240866	1.17262	1.34729	2.05123	1.32549		122.931	67.6974					13.7091	-135.337	-39.6959	-56.2459
-0.0525	39.6511	69.5843	42.0098	53.3496	31.8743	80.1666	29.4455	55.1067	46.6372	80.0783	48.5526	57.3728	-0.0525	9.80793	7.66404	10.1142	10.4726	12.7766	6.98041	11.4637	13.2795	8.21574	26.3133	10.8933	12.4414	-0.0525	2.52485	1.35158	4.67019	0.684622	3.21845	0.0952642	1.04231	1.91278	1.48736	0.706447		230.969	216.042					-11.3702	-17.7287	-35.7465	-96.5094
-0.0515	35.6967	69.4555	38.5603	56.2516	31.5102	71.2337	31.0218	50.6527	47.3982	79.6844	46.286	61.2596	-0.0515	11.5569	8.93145	10.9084	10.1269	11.043	4.39942	12.786	15.0233	8.28504	24.1573	11.3089	14.9726	-0.0515	1.95362	0.697666	3.80112	0.806452	3.45777	0.293434	1.25855	2.33799	1.42671	0.319518		3.05556	-6.33333					-16.3137		-8.2899	-18.2344
-0.0505	34.1466	71.2165	33.999	60.4645	32.1395	62.6366	33.8556	47.1389	46.9869	75.6275	46.9074	70.7203	-0.0505	12.6615	13.6887	12.0514	12.1489	10.3761	4.21603	13.5632	18.5547	8.19166	21.7617	11.2695	16.2368	-0.0505	1.38434	0.285753	2.88597	1.3255	3.43356	0.703912	1.77159	2.54721	2.02195	0.212307		7.31884	-4.5045							8.2584	-9.9519
-0.0495	35.6497	75.0874	30.19	67.1482	34.7232	57.3185	36.2391	45.5463	45.3426	68.7455	47.5676	81.8292	-0.0495	13.0337	20.8477	13.3091	16.5235	10.2651	6.64142	13.4901	23.0521	8.31123	19.0013	10.5938	19.4235	-0.0495	1.14882	0.0919919	2.04357	1.95127	3.49243	1.31508	2.44862	2.7446	3.11497	0.408347		57.6825	22.9167							-10.4924	-35.0878
-0.0485	37.9595	78.8829	28.3137	75.0501	38.8937	54.4362	37.3493	47.021	42.9617	60.4619	45.2904	89.2157	-0.0485	13.2537	29.1865	14.2092	21.719	10.0963	11.0122	12.4066	27.2826	8.74167	15.8562	9.41105	28.6405	-0.0485	1.38434	0.02378	1.41004	2.3899	3.76659	1.91343	3.27726	3.11791	4.19087	0.991314		10.2424	0.47619							-34.0645	-54.4969
-0.0475	38.5106	80.6926	28.3456	80.5308	43.4293	52.0107	37.4993	52.3218	40.3746	53.6907	39.5733	89.8084	-0.0475	13.7795	37.7362	14.4681	25.3702	9.65182	15.8152	10.4562	29.5938	9.20986	13.7825	8.08748	44.6998	-0.0475	1.9531	0.0090906	1.15453	2.56261	3.99629	2.1682	4.31179	3.54549	4.63851	1.998		73.3333	-9.39394							-24.5581	37.9683
-0.0465	36.9017	80.6437	29.6239	80.4597	47.0395	49.3169	37.9247	61.1801	38.0614	51.6647	32.6954	85.0417	-0.0465	14.3664	45.2955	14.0619	26.3625	9.00353	19.024	8.20724	28.6749	9.43839	15.1517	7.07192	62.6198	-0.0465	2.52145	0.02378	1.33633	2.66269	3.87634	1.91343	5.37254	3.68268	4.17281	3.1938		214.01	198.333							-36.2553	-6.7692
-0.0455	34.6524	79.6244	31.7516	74.7979	48.4894	46.7537	39.832	72.5463	36.9394	54.6014	27.837	79.113	-0.0455	14.3444	50.2056	13.0837	25.6615	8.23862	19.2108	6.44338	24.7344	9.47718	20.9569	6.72766	73.8239	-0.0455	2.75449	0.0912948	1.79971	2.91182	3.38652	1.31508	5.94605	3.29777	3.04019	4.03775		64.0278	46.3889							-27.2999	-60.8838
-0.0445	33.4832	77.2821	34.6589	66.0305	47.0118	44.6509	43.3019	84.6567	37.9469	58.9009	26.8037	75.408	-0.0445	13.385	51.3424	11.7619	24.7494	7.47974	16.899	5.7066	19.7594	9.71207	29.6094	7.13355	72.1545	-0.0445	2.50754	0.281208	2.2774	3.35435	2.72436	0.703912	5.57396	2.48862	1.78776	4.03775		61.7105	35.4167							-32.2059	-16.0037
-0.0435	34.3412	72.5633	37.9282	57.1382	43.501	42.9068	46.9609	94.3281	40.6191	60.8587	29.0087	74.7519	-0.0435	11.9539	49.045	10.5566	23.8558	7.06217	14.5784	5.9476	16.1497	10.5668	38.25	7.93808	58.7125	-0.0435	1.89957	0.674583	2.59882	3.92453	2.13033	0.293434	4.35959	1.62276	0.844708	3.19452		29.0502	-16.1							-5.6346	-15.0989
-0.0425	37.3266	66.1726	40.6105	50.798	40.5959	41.397	48.7329	97.5666	42.9026	60.5191	32.2098	76.1973	-0.0425	10.9391	44.4628	9.99196	22.2217	7.39051	14.7187	6.59532	15.1016	12.0521	44.9024	8.49165	40.7515	-0.0425	1.23141	1.26098	2.76527	4.52029	1.8599	0.0952642	2.99927	1.11515	0.319128	2.00198		15.756	-8.09028							-141.25	-110.294
-0.0415	41.7274	61.2455	42.1377	48.9864	40.5221	40.2211	47.3381	92.6729	43.0255	61.2717	34.2958	78.421	-0.0415	10.7356	38.6309	10.2262	19.6853	8.50084	17.6018	7.07108	16.3667	13.5717	48.9787	8.32681	25.7416	-0.0415	0.820461	1.83825	2.86236	4.94651	2.10963	0.0240866	2.30654	1.23437	0.095938	1.01045		84.2652	30.9375							-15.4881	-18.501
-0.0405	46.1938	60.7027	43.1503	51.9236	43.0716	39.7763	43.3619	82.368	41.0841	65.9889	34.5539	80.4509	-0.0405	10.8169	32.7344	10.8004	17.3136	9.96004	21.47	7.30268	18.9536	14.3809	50.1563	7.6228	16.9165	-0.0405	0.874506	2.10094	2.9747	5.01155	2.81617	0.00474292	2.70009	1.98927	0.0228507	0.478759		81.7708	68.75
-0.0395	49.3771	64.3486	44.6768	57.9449	46.2237	40.9364	38.7679	71.3782	38.3873	73.8256	33.5578	81.8173	-0.0395	10.4258	28.0755	10.9436	16.3195	11.2554	24.7062	7.67832	21.5438	14.2729	48.0537	7.09534	13.8595	-0.0395	1.45622	1.925	3.14023	4.77654	3.60086	0.000727351	3.9777	3.05414	0.00422912	0.408347		122.639	80.8333
-0.0385	50.5835	69.103	46.2589	65.0191	48.2646	44.7309	35.4047	61.9242	35.8568	80.5095	32.2921	82.4088	-0.0385	9.54165	24.7718	10.1829	16.7707	12.0858	27.1466	8.54438	22.8607	13.6402	43.4835	7.34232	15.1291	-0.0385	2.47346	1.54149	3.28337	4.51396	4.02866	0	5.40341	3.83619	0.000562322	0.724863		4.65217	19.086
-0.0375	49.8568	71.9436	45.7644	71.8777	48.7756	51.3562	34.1284	52.824	33.6558	81.8322	31.3356	82.3287	-0.0375	8.87386	21.5621	8.63004	17.663	12.306	29.1076	9.9416	22.7402	12.9118	39.0515	8.4209	19.0747	-0.0375	3.66366	1.34917	3.2167	4.34832	3.94699	0	6.13351	3.8331	0	1.30635		40.4722	-0.833333
-0.0365	47.6759	72.2505	41.7726	77.5595	48.0734	59.6029	34.8458	42.6816	31.8986	77.0827	30.4452	81.8746	-0.0365	9.02497	17.9268	6.80363	17.944	11.8777	30.1562	11.7611	22.6988	12.1586	37.3798	10.0545	23.3651	-0.0365	4.63571	1.54149	2.79432	4.10647	3.59134	0	5.80652	3.0353	0	1.89358		50.6101	35.2976
-0.0355	44.5715	71.331	35.6067	80.491	46.3951	67.2013	36.7033	32.3058	30.8889	69.1064	28.8756	81.6006	-0.0355	9.92235	15.5437	5.37559	17.1288	11.0201	29.6629	13.7929	24.3634	11.2442	38.5691	11.967	25.5509	-0.0355	5.02453	1.925	2.07877	3.58112	3.42992	0	4.754	1.91799	0.000562322	2.14489		137.978	112.976
-0.0345	40.8169	70.3085	30.2175	78.5465	43.6568	71.7206	38.4859	23.9683	30.7258	61.3202	26.3193	82.3503	-0.0345	10.9597	16.5454	5.01055	15.4782	10.316	27.9389	15.5123	27.187	10.1695	40.0988	13.8486	24.5933	-0.0345	4.70025	2.10094	1.33577	2.84678	3.84916	0.000727351	3.5717	1.0264	0.0036668	1.89286		187.145	175.108
-0.0335	36.4929	69.3043	27.4494	70.6902	39.9133	71.7947	39.544	19.9236	31.1298	55.4212	23.4217	85.0412	-0.0335	11.4867	20.5492	6.07618	14.1275	10.4085	25.9969	16.2325	28.7148	9.21397	39.6478	15.1985	21.5532	-0.0335	3.87064	1.83825	0.872347	2.2447	4.82931	0.00474292	2.57869	0.644822	0.0186215	1.30094		136.551	74.1026
-0.0325	31.9406	68.3742	27.0319	59.1501	36.014	68.1284	40.3049	21.8275	31.7655	51.9782	21.1614	89.6982	-0.0325	11.2026	24.1829	8.27387	14.5562	11.3131	24.4647	15.7792	27.3869	8.78771	37.33	15.4877	18.7618	-0.0325	2.96261	1.26098	0.878041	2.0482	5.90868	0.0240866	1.77503	0.796154	0.0736496	0.696343		16.6453	6.59204
-0.0315	28.0087	67.8335	27.7656	49.1797	33.5096	63.3704	41.5507	29.8847	32.7342	51.8822	19.8676	94.4663	-0.0315	10.2122	24.036	10.619	17.1989	12.139	23.2162	14.8037	24.159	9.10384	34.5642	14.5828	18.3708	-0.0315	2.33637	0.67528	1.37019	2.16121	6.56307	0.0952642	1.14646	1.3562	0.226857	0.290999		422.862	387.719
-0.0305	25.7593	67.4119	28.785	45.362	33.5743	60.7128	43.3398	41.4639	34.7851	56.0075	19.1725	96.3189	-0.0305	8.79718	20.0004	11.9586	20.7152	11.8991	21.8113	14.187	21.101	9.95637	31.9264	12.9579	21.291	-0.0305	2.05619	0.285753	2.21223	2.20118	6.61435	0.293434	0.816872	2.10395	0.544201	0.0989318		324.347	327.906
-0.0295	25.8516	66.4623	29.6129	48.0682	36.0042	62.1653	44.8889	51.6911	38.5969	63.5123	18.806	93.2735	-0.0295	7.24123	15.4073	11.7398	22.9673	10.6189	20.1569	14.1996	19.439	10.8266	29.4078	11.3578	26.6154	-0.0295	1.94139	0.115075	3.19582	1.90107	6.25303	0.703912	0.942979	2.809	1.0167	0.0483747		389.855	348.158
-0.0285	28.0324	65.5465	29.8393	54.1554	39.3741	67.5941	45.1895	57.1176	43.4813	71.1351	19.0089	85.7931	-0.0285	5.89098	13.9083	10.436	22.6323	9.41067	18.8703	14.3308	19.5771	11.2609	27.6502	10.2162	31.8327	-0.0285	1.87238	0.118923	4.15669	1.3757	5.77304	1.31508	1.54956	3.39575	1.47929	0.103624		6.47569	3.1746
-0.0275	31.1275	66.4383	29.4444	60.8977	42.1161	74.7866	43.5356	58.7403	47.2718	74.8066	20.0986	76.3901	-0.0275	5.16825	16.4311	9.14161	19.9503	9.44331	18.6976	13.8636	21.9999	11.1873	27.1909	9.46408	34.5138	-0.0275	1.97545	0.309533	4.99889	0.994475	5.32454	1.91343	2.42522	3.96713	1.67738	0.314826		28.7712	3.35088
-0.0265	33.6284	69.7429	29.1243	68.0758	43.4932	80.5406	39.9761	60.2376	48.1716	72.721	21.9383	68.1341	-0.0265	5.3243	20.8765	8.56153	16.4847	10.9555	19.5034	12.6008	26.8564	10.908	27.0266	8.77656	34.2911	-0.0265	2.39978	0.77112	5.59189	1.08214	4.85194	2.1682	3.17383	4.59165	1.48663	0.790583		28.1081	17.9717
-0.0255	34.6793	73.4793	29.6318	75.8696	43.7979	82.8713	35.6142	63.3743	46.6874	67.265	24.1513	62.778	-0.0255	6.21181	24.3091	8.44518	14.3656	13.1513	20.3859	11.1629	32.744	10.8366	25.2759	7.81509	32.6363	-0.0255	2.96251	1.56458	5.73461	1.74683	4.24514	1.91343	3.47409	5.1026	1.05451	1.59122		105.952	51.6972
-0.0245	34.7428	74.7667	30.834	82.2292	43.9136	82.8394	32.1324	66.3112	45.4169	63.1087	26.7	59.8108	-0.0245	7.37222	25.3525	8.13018	15.1053	14.8309	20.9023	10.5386	37.0487	11.291	21.2465	6.39082	30.8584	-0.0245	3.18867	2.59958	5.32735	2.86551	3.51009	1.31508	3.32632	5.15574	0.69573	2.5892		115.765	132.453
-0.0235	35.0195	72.2553	31.7915	83.9529	44.5996	83.2691	30.6894	66.4171	46.8068	62.589	29.6693	57.6723	-0.0235	8.31994	24.7437	7.48294	18.3293	15.1522	21.5765	11.0681	37.8934	12.41	16.247	4.67585	29.202	-0.0235	2.78571	3.61936	4.53804	4.15182	2.75632	0.703912	2.98671	4.51517	0.702859	3.44655		241.451	207.981
-0.0225	35.9709	66.6432	31.6262	79.8986	45.6822	85.0461	31.2463	63.4249	51.0249	63.4626	32.4326	55.7789	-0.0225	8.72078	24.1449	7.08681	21.6578	14.043	23.0532	11.8636	35.2903	14.0043	12.2547	3.26686	27.7515	-0.0225	1.96572	4.34199	3.69644	5.26444	2.13678	0.293434	2.71829	3.31077	1.25489	3.79041		58.7647	40.9069
-0.0215	36.7725	59.7413	30.1528	71.8808	45.7258	86.0671	32.7369	59.3637	55.7375	61.9893	33.8668	54.6826	-0.0215	8.40637	24.7132	7.59262	22.4897	12.1055	25.2358	11.6025	30.4748	15.4071	10.0353	2.89662	27.0126	-0.0215	1.24061	4.59913	3.01283	5.90798	1.86204	0.0952642	2.68753	1.9855	2.3562	3.46966		31.1798	13.5401
-0.0205	36.4806	53.4995	27.9037	62.8839	43.152	84.55	33.7405	56.317	57.8009	57.7476	33.7276	54.4469	-0.0205	7.42596	26.2794	9.04671	20.2023	10.1323	27.6108	9.95428	24.7715	15.7783	8.80898	3.99748	27.1204	-0.0205	0.99622	4.34654	2.4658	5.90798	2.11661	0.0240866	2.94443	0.958897	3.75193	2.68344		53.3333	65.4762
-0.0195	35.2898	49.6041	25.8613	55.5445	38.1373	81.5	33.336	54.9415	55.4209	54.5696	33.0808	54.1034	-0.0195	6.16029	27.5171	10.8038	16.3893	8.65883	30.0685	7.93954	19.2052	14.8614	7.66126	6.41928	27.1387	-0.0195	1.29306	3.64314	1.98751	5.26374	2.85109	0.00474292	3.30355	0.369353	4.98763	1.8815		97.5881	73.6626
-0.0185	34.3556	49.4845	25.1288	51.8352	32.8033	79.0027	31.7753	54.5854	49.1852	56.7505	32.9593	53.2917	-0.0185	5.24404	27.2447	11.9932	13.1105	7.89945	32.5989	6.91641	14.5194	13.3873	6.73095	9.41699	25.8747	-0.0185	1.91636	2.69612	1.6558	4.14793	3.73707	0.000727351	3.3613	0.112726	5.68143	1.48693		41.0128	43.8397
-0.0175	34.7818	53.8726	26.5524	52.5463	29.1202	77.977	30.404	54.0017	41.403	64.841	33.189	53.7896	-0.0175	5.17962	25.7085	12.1225	11.3601	7.901	34.0771	7.53367	11.2031	12.5795	6.6542	11.9423	23.4776	-0.0175	2.51384	1.87341	1.59404	2.84678	4.43991	0	2.85973	0.0270644	5.73315	1.61505		129.444	94.5885
-0.0165	37.0018	61.698	30.2658	56.3232	27.2886	78.4726	30.7566	52.1891	34.6179	75.1223	33.056	58.2585	-0.0165	5.95988	24.156	11.3666	11.2325	8.53743	32.6547	9.54697	9.87733	13.2134	7.2715	13.1576	21.9128	-0.0165	2.76944	1.55938	1.72431	1.6779	4.89773	0	1.99521	0.00513536	5.26065	1.99179		11.9697	12.2561
-0.0155	40.6266	69.7873	35.4071	60.1099	26.6688	80.4268	33.423	49.4987	30.3566	82.6201	32.7319	67.058	-0.0155	7.07861	23.4759	10.3504	12.8292	9.38275	28.3069	12.1615	11.6763	15.0702	7.53183	12.9068	23.6194	-0.0155	2.57549	1.93778	1.7653	0.890226	5.25181	0	1.25435	0.000682819	4.429	2.16944		68.6296	58.8889
-0.0145	44.5223	74.4303	40.3962	61.6544	27.4436	83.1706	37.5282	48.1044	28.5964	84.429	33.336	77.0666	-0.0145	7.88084	24.0262	9.62162	16.5707	9.79785	24.0023	14.3759	17.3977	17.1361	6.76068	11.8339	29.6053	-0.0145	2.10943	2.88603	1.51117	0.596255	5.54763	0	1.01146	0	3.38502	1.89755		275.152	285.877
-0.0135	47.3277	73.64	43.797	61.4848	30.3724	85.3881	41.3805	50.5797	28.2031	81.0514	35.539	84.1955	-0.0135	7.89545	26.509	9.31409	22.666	9.32147	23.2411	15.2647	25.7136	18.3459	5.63408	10.963	38.5587	-0.0135	1.73053	4.04106	1.03271	0.779237	5.63293	0	1.33814	0	2.29126	1.30166		89.1975	65
-0.0125	48.1763	68.2588	45.1706	61.9366	35.1078	86.3066	43.8642	57.0181	28.2918	75.62	38.8127	86.3973	-0.0125	7.01308	31.8217	9.33223	30.165	8.05972	26.8607	14.3572	32.9205	18.3167	5.70494	10.9838	47.2375	-0.0125	1.73105	4.95533	0.568727	1.29758	5.36659	0	2.06895	0	1.34373	0.696343		201.071	158.376
-0.0115	46.8579	61.0108	45.2164	64.543	39.5845	86.4181	45.3325	63.6689	29.3007	71.776	42.289	84.1604	-0.0115	5.61394	39.5233	9.79088	36.5159	6.65598	32.6532	12.0118	35.6127	17.4288	8.08486	11.8297	51.7649	-0.0115	2.11284	5.26384	0.307318	1.8576	4.80733	0	2.95533	0	0.715476	0.290279		306.609	238.746
-0.0105	43.5229	54.273	45.1275	68.9681	41.4787	87.2306	46.8391	65.6074	32.5033	71.5404	45.3925	79.4579	-0.0105	4.51766	46.8948	11.0668	38.8765	5.85972	37.2744	9.28762	33.7737	16.2293	12.5903	12.813	49.6417	-0.0105	2.59333	4.86736	0.32553	2.10044	4.14633	0	3.79311	0	0.49829	0.0942398		15.1802	-1.16959
-0.0095	38.8012	48.7572	45.5941	74.0506	40.2628	90.86	48.3849	61.3976	38.4869	74.9387	47.1514	74.8169	-0.0095	4.54805	50.3779	13.2904	36.5605	6.12671	38.1571	7.1832	30.6273	14.8998	18.0468	13.0905	41.3908	-0.0095	2.84027	4.04978	0.660645	1.85301	3.55024	0	4.42864	0	0.714351	0.0238276		51.3058	26.3667
-0.0085	34.307	44.4205	46.2414	78.8252	37.739	98.9512	48.5147	54.6376	46.2593	81.0036	46.0548	72.131	-0.0085	5.96779	48.5169	15.864	31.8854	7.49457	34.6515	5.97884	29.4717	13.3395	23.3531	12.2137	30.3087	-0.0085	2.73524	3.28645	1.33207	1.27355	3.11159	0	4.66825	0	1.33639	0.00469192		157.975	81.1438
-0.0075	32.3989	42.0255	46.2251	82.3737	36.3606	110.684	45.9933	50.9017	53.6255	88.2376	41.7056	71.5632	-0.0075	8.32438	42.975	17.6496	28.2907	9.5665	28.366	5.42054	31.1015	11.5211	27.9313	10.5453	20.4301	-0.0075	2.45615	2.81258	2.27055	0.681684	2.86238	0	4.30656	0	2.25402	0.00071953		197.674	183.208
-0.0065	34.7171	42.9792	45.3921	83.4462	37.0414	122.137	41.4661	53.5699	58.2821	94.6145	36.1091	72.0047	-0.0065	10.8239	36.2259	17.7684	27.8107	11.5275	22.2828	5.40758	33.8644	9.5868	30.9683	9.14738	14.3702	-0.0065	2.31276	2.45491	3.26829	0.284168	2.78266	0	3.35115	0	3.23772	0		178.696	161.9
-0.0055	40.6403	47.4533	44.656	81.0219	38.7761	128.855	37.1308	61.8986	58.9389	98.4539	32.3598	72.5187	-0.0055	12.8276	29.2044	16.3599	30.1031	12.5036	18.9308	6.21818	35.2772	7.7634	31.0813	9.0375	12.3229	-0.0055	2.45903	1.94948	4.02775	0.0929602	2.84465	0	2.13586	0	3.97529	0		52.1454	18.6792
-0.0045	47.3893	53.2709	45.1965	75.6428	40.1289	129.038	34.9579	71.6672	55.9869	99.2008	32.1162	72.9975	-0.0045	14.0799	21.8935	14.5752	33.2308	12.2536	19.0664	8.0058	33.7091	6.3988	27.7038	10.3875	12.5139	-0.0045	2.74914	1.29246	4.28245	0.0279191	3.03852	0	1.09572	0	4.17281	0		54.4792	10.9524
-0.0035	52.0989	57.4208	47.4609	70.0535	40.5079	123.65	35.2913	77.8613	51.4175	96.9419	34.7438	73.9009	-0.0035	14.6444	15.1426	13.6929	35.1251	11.386	21.7837	10.3275	29.6373	5.95982	22.3519	12.3873	12.7089	-0.0035	2.89091	0.702908	3.96358	0.0279191	3.32003	0	0.461084	0	3.70342	0		64.346	10.8854
-0.0025	53.8242	58.7086	50.9434	67.4992	40.2207	114.507	37.173	78.4831	47.9369	91.9549	38.4188	75.6226	-0.0025	14.7419	10.7842	14.0863	34.5227	10.6054	25.42	12.3431	25.922	6.73739	17.6033	13.9166	11.7509	-0.0025	2.73287	0.3732	3.31352	0.0929602	3.57586	0	0.214429	0	2.74147	0		100.247	12.963
-0.0015	53.2693	58.385	54.7391	68.4483	40.1813	103.689	39.9731	76.4033	47.4361	85.2774	41.4644	77.3466	-0.0015	14.5807	10.1567	14.9887	31.1929	9.98479	28.3753	13.4004	26.0949	8.54821	15.1495	14.4529	10.1824	-0.0015	2.39397	0.372503	2.74856	0.284872	3.69358	0	0.269402	0.000682819	1.70876	0.00071953		73.7292	28
-0.0005	51.1924	58.1593	58.2716	69.5445	42.1258	94.2337	44.9361	77.2423	50.4389	79.4701	43.0931	76.5886	-0.0005	14.2453	12.8419	15.2431	26.3158	9.35704	29.7084	13.4367	31.2277	10.8147	15.3133	14.3958	9.57139	-0.0005	2.11917	0.697666	2.52351	0.686277	3.65672	0	0.606687	0.00445254	1.0202	0.00469192		47.3684	11.7157
0.0005	48.1281	58.4599	62.146	67.492	49.2838	89.7176	55.9618	86.3601	58.2354	78.9691	43.4896	71.3572	0.0005	13.7454	16.759	14.2735	22.5995	9.05979	29.3333	12.9857	38.445	12.9473	17.741	14.4674	10.8793	0.0005	2.0192	1.26483	2.58783	1.29758	3.59134	0	1.25326	0.0226119	0.866996	0.0238276		44.1667	10.2151
0.0015	45.4324	58.8888	69.5148	64.2514	67.5571	93.1037	80.8737	109.409	76.5708	90.2299	43.0888	62.9606	0.0015	13.1456	19.4988	12.4006	22.7368	9.64702	27.597	12.7541	43.4017	14.5869	21.7707	14.8278	13.1477	0.0015	2.00434	1.8351	2.81249	1.95056	3.72072	0.000727351	2.1821	0.0894317	1.18318	0.0942398		12.7292	23.9524
0.0025	45.3804	59.3842	86.6807	67.1338	105.952	107.207	131.605	153.79	114.982	120.053	41.7189	54.9611	0.0025	12.5433	19.9313	10.4344	26.7822	10.9547	24.8845	13.0239	44.1599	15.5246	26.4752	14.9148	14.0788	0.0025	1.98772	2.08241	3.3227	2.41252	4.18826	0.00474292	3.27013	0.276152	1.72844	0.290279		8.4359	-0.747126
0.0035	49.5104	60.3193	119.382	82.4554	171.181	134.846	216.615	222.507	176.756	168.925	38.795	48.9123	0.0035	11.9492	18.7837	9.14315	31.4861	12.1281	21.8796	13.5406	41.7701	15.6005	30.7824	14.207	12.2492	0.0035	2.04521	1.85679	4.70911	2.65487	4.87499	0.0240866	4.3387	0.665268	2.22469	0.696343		21.5326	-22.4167
0.0045	56.6913	61.8541	164.08	108.085	254.629	174.05	325.407	301.209	246.079	222.646	34.1181	42.7499	0.0045	11.31	17.8422	9.00667	32.9564	12.864	19.7697	14.1626	37.7461	14.9782	33.6413	12.968	8.51876	0.0045	2.30644	1.35158	8.08739	2.94826	5.49024	0.0952642	5.2132	1.25718	2.49712	1.30094		83.2955	6.80556
0.0055	62.7775	63.4261	202.813	131.725	324.861	211.694	422.844	356.373	290.515	254.955	27.9703	33.9776	0.0055	10.6399	18.5038	10.3553	30.1919	14.4578	19.596	15.6473	33.0162	14.7445	34.5581	12.185	5.11808	0.0055	2.7817	0.955791	14.7148	3.60269	5.91005	0.293434	5.79182	1.88571	2.49966	1.89286		189.345	94.7333
0.0065	62.8738	64.0702	212.525	138.256	343.589	227	469.667	357.643	285.384	246.711	20.8418	23.0811	0.0065	10.1218	20.608	13.8189	25.876	19.3151	21.5694	19.9335	29.523	17.2515	34.3418	12.9105	3.95974	0.0065	3.33418	0.955791	24.9794	4.67455	6.33355	0.703912	6.11538	2.31092	2.23908	2.14489		153.73	107.955
0.0075	55.1389	63.6091	184.252	121.778	297.058	207.428	452.864	304.857	236.403	203.503	13.6091	12.9739	0.0075	10.2627	22.4502	20.6366	23.6877	28.9579	25.3246	29.83	30.9377	25.4833	35.0779	15.5136	6.02243	0.0075	3.71309	1.35158	37.4271	5.96135	7.03512	1.31508	6.29558	2.4571	1.7798	1.89358		206.687	127.44
0.0085	42.593	63.0158	131.87	90.6478	208.97	161.239	391.96	227.738	173.496	150.098	7.50993	6.07774	0.0085	12.1555	22.2737	32.398	24.8283	42.0579	30.445	48.2253	40.7019	41.7891	39.1217	19.2054	11.5279	0.0085	3.62614	1.85679	48.8661	7.18376	8.02714	1.91343	6.31758	2.46913	1.31721	1.30563		243.008	195.079
0.0095	30.8422	62.8054	80.182	59.8407	119.723	111.079	317.164	159.199	124.061	108.687	3.4126	2.83423	0.0095	17.5356	19.9763	50.3088	27.2547	54.662	36.1754	76.4962	59.3358	67.0073	48.0641	22.4863	19.8412	0.0095	2.96199	2.08241	55.6922	8.14027	9.01028	2.1682	6.0483	2.4571	1.10759	0.720171		156.954	106.316
0.0105	24.1867	61.6768	46.1471	39.6158	56.5621	75.3404	247.926	113.811	96.033	85.7368	1.28145	2.47607	0.0105	28.0041	17.2683	74.3769	28.2973	63.0644	40.7206	112.283	83.4323	99.9061	62.1002	24.6034	29.4082	0.0105	1.9589	1.8344	55.5908	8.74455	9.59007	1.91343	5.50551	2.31092	1.25089	0.384519		226.188	153.389
0.0115	23.5662	58.0263	31.452	31.6333	23.5135	57.345	190.618	89.0809	82.1817	75.7429	0.504115	4.27518	0.0115	43.4583	16.464	102.411	27.7674	66.4285	41.7528	148.562	107.336	135.823	79.9697	26.4175	38.4293	0.0115	1.02919	1.26029	48.6505	8.90339	9.48365	1.31581	4.9203	1.88571	1.57213	0.384519		16.6788	5.13333
0.0125	26.8387	52.5127	28.2233	32.1836	11.0887	49.8917	146.139	77.8048	72.7841	70.5993	0.55239	8.04203	0.0125	60.9642	19.1157	129.4	28.3706	66.1824	38.2506	176.508	126.935	165.874	99.225	29.4324	45.917	0.0125	0.425744	0.674583	37.261	8.40746	8.58237	0.708655	4.46202	1.25718	1.76853	0.72089		45.4167	1.09375
0.0135	30.3555	47.9338	28.0654	36.3147	8.66956	45.0496	113.702	75.1312	63.1842	65.18	1.29925	13.972	0.0135	75.4738	24.9243	148.674	33.117	63.4727	31.489	190.805	142.087	180.173	115.942	34.3102	52.0776	0.0135	0.140874	0.281208	24.8457	7.15262	6.9784	0.317521	4.12371	0.665951	1.70982	1.31032		93.2051	22.5
0.0145	31.1628	46.7169	27.0783	40.1974	9.78716	38.7702	90.966	77.9551	53.9366	58.6042	2.91995	22.0558	0.0145	82.3361	31.3865	154.839	42.0767	58.2014	23.943	192.293	154.278	173.927	124.605	40.5165	57.4964	0.0145	0.0519366	0.0912948	14.2889	5.48225	5.04232	0.190528	3.95901	0.281287	1.56147	1.9174		38.7913	2.85714
0.0155	28.8547	49.3738	25.7205	42.1035	11.736	30.4698	75.9296	82.6501	47.5023	52.8306	5.57141	31.1363	0.0155	79.9213	35.1147	146.298	51.725	50.2609	17.6541	185.363	162.231	150.184	120.535	46.644	61.7118	0.0155	0.0752891	0.0230829	6.99376	4.03065	3.3534	0.317521	4.18844	0.116496	1.5609	2.23913		142.672	118.676
0.0165	25.7299	54.8782	25.7149	42.2555	13.6297	21.7253	68.9909	85.3356	45.1063	49.83	9.01167	38.6713	0.0165	70.4464	34.3794	125.64	57.8195	40.7099	13.8651	173.72	162.105	116.729	103.776	50.6979	62.9089	0.0165	0.211951	0.0045453	2.86867	3.13165	2.34789	0.708655	4.92888	0.134655	1.70671	2.18386		99.1221	54.5238
0.0175	24.9291	61.3193	27.2394	41.684	15.0887	15.1982	71.2753	84.3211	45.7748	49.724	12.4143	42.2372	0.0175	58.3036	30.3719	98.4119	58.9543	31.5118	13.3628	158.922	152.698	81.5843	79.8746	50.9462	59.6994	0.0175	0.505937	0.000697045	0.971168	2.57371	2.00919	1.31581	5.90697	0.369353	1.75357	2.00198		29.9231	24.7126
0.0185	28.0602	66.5436	28.6301	40.8948	15.8198	13.3277	80.9367	81.0868	47.3543	51.0336	14.7214	41.5401	0.0185	47.1805	25.9326	71.1011	57.1694	24.4998	16.2593	141.936	138.023	50.8662	56.3742	47.2733	53.1491	0.0185	0.945215	0	0.267739	1.99262	1.99255	1.91343	6.53772	0.936967	1.51654	2.02111		41.7593	39.7967
0.0195	34.2441	69.2757	28.2637	39.4641	15.5674	16.9037	92.5547	78.1279	48.022	51.9845	15.5394	38.4355	0.0195	38.4006	23.4747	48.6341	55.6372	20.713	21.5104	124.963	123.412	28.173	38.5499	41.5717	46.2048	0.0195	1.37528	0	0.0588835	1.30606	2.03999	2.1682	6.33568	1.89538	1.09402	2.2781		163.37	155.625
0.0205	40.9329	69.7916	26.3887	37.0759	14.198	24.0933	100.475	76.3863	46.9609	51.5799	15.7015	35.1545	0.0205	31.5082	23.9196	32.7126	56.0893	20.4602	27.1175	110.855	111.082	14.2097	27.388	36.5875	40.9854	0.0205	1.55892	0	0.0102312	0.68839	2.1805	1.91343	5.32766	3.03085	0.77162	2.5341		282.628	252.941
0.0215	45.1194	69.3998	25.0095	34.7008	11.856	31.0589	102.112	75.1049	44.3223	49.942	16.537	33.2512	0.0215	25.8391	26.574	22.6096	57.689	23.5445	30.9403	100.613	100.511	7.24524	20.4871	34.2201	37.2413	0.0215	1.37869	0	0.00113417	0.289466	2.53336	1.31508	4.08639	3.83174	0.771058	2.63686		46.9547	-9.96795
0.0225	44.3711	69.6386	25.9388	34.2318	9.06632	34.5843	98.3047	73.316	40.9994	48.2303	18.3939	33.839	0.0225	21.4497	29.5831	17.3271	57.6189	29.0101	31.7927	92.8486	91.0097	4.58585	15.0671	34.3375	33.594	0.0225	0.96305	0	0	0.115582	3.06575	0.703912	3.33582	3.83174	1.09091	2.70081		118.323	5.84848
0.0235	38.2213	71.502	28.8957	36.9272	6.68114	34.4776	91.3836	70.735	38.1775	48.281	20.1984	37.4052	0.0235	18.9677	30.986	16.5632	53.3966	34.9052	30.4903	86.4256	82.6847	3.97747	10.5019	34.9078	29.6959	0.0235	0.57834	0	0	0.116286	3.62073	0.293434	3.48036	3.03153	1.50158	2.8802		237.271	137.5
0.0245	29.0582	74.1974	31.6903	42.3537	5.63152	32.8415	83.2154	67.5508	36.8177	51.5122	20.7174	43.0479	0.0245	18.7926	29.783	20.0788	45.6236	38.9396	29.642	82.1252	76.1462	4.15303	8.03099	33.7783	26.8235	0.0245	0.442533	0	0	0.293354	4.06847	0.0952642	4.44813	1.89983	1.69855	3.13223		201.389	140.556
0.0255	20.7792	74.6163	32.5159	48.8914	6.60035	31.0783	74.7003	63.9692	37.5623	57.4008	20.0223	48.588	0.0255	20.4294	26.2268	27.1489	38.5103	39.6728	31.6096	80.7737	72.4315	4.61323	8.58726	30.6768	26.5222	0.0255	0.660191	0	0	0.705714	4.31302	0.0240866	5.85095	0.958897	1.55407	3.29273		266.289	185.863
0.0265	16.0453	69.5047	31.7697	55.3482	9.71434	28.5455	66.6461	60.4517	40.8035	63.1417	19.4412	51.5644	0.0265	22.5218	21.478	36.9453	36.8269	37.1093	36.6296	81.1272	72.9366	5.20244	11.2544	27.1269	29.0389	0.0265	1.2419	0	0	1.36581	4.22394	0.00474292	7.19096	0.454332	1.24723	3.24145		341.973	243.365
0.0275	14.9051	58.8724	31.1251	61.9103	14.1565	24.2952	60.4281	58.764	46.3217	65.3314	20.1577	50.2177	0.0275	23.5327	17.1401	48.6332	41.5804	32.4037	42.9303	80.8368	78.6076	5.80691	13.6665	24.3621	32.9081	0.0275	2.09553	0.000697045	0	2.13788	3.73251	0.000727351	7.97867	0.387513	1.10702	2.94016		201.418	130.906
0.0285	15.7435	46.5898	31.2458	69.1217	17.9513	19.356	57.2728	62.2366	52.734	62.2996	22.0066	44.5	0.0285	22.5115	14.6907	60.4897	48.6817	27.1512	48.0198	79.0949	88.711	6.25272	13.85	21.9508	35.7845	0.0285	3.01007	0.00524235	0	2.78601	3.04182	0	7.8875	0.688563	1.31721	2.47414		254.079	166.758
0.0295	17.0218	37.5539	31.3247	76.18	18.8377	16.6336	57.0874	73.1779	57.7525	55.1941	23.6174	36.7806	0.0295	19.54	15.0487	69.5151	52.4268	22.6842	49.8321	77.4279	100.138	6.35974	11.9714	18.7961	35.8924	0.0295	3.69577	0.0283253	0	3.15059	2.59628	0	6.98784	1.24484	1.7798	2.09152		93.5015	48.6275
0.0305	18.1195	34.6625	30.673	80.9339	16.1971	18.4035	58.6492	89.2377	59.5076	47.3538	23.6849	30.9047	0.0305	15.694	18.5304	73.1376	50.5922	19.8649	47.7062	77.6294	108.307	6.13982	10.2394	14.955	33.2219	0.0305	3.87889	0.11962	0	3.22341	2.69214	0	5.82821	1.82403	2.23908	2.02111		348.639	326.79
0.0315	19.1229	37.7415	29.621	81.6798	11.95	23.9312	61.0276	103.639	57.7261	42.4545	21.9919	29.6421	0.0315	12.4725	24.6869	71.4729	45.9146	19.4244	42.9842	79.2603	109.775	5.87613	10.9541	11.9458	29.3858	0.0315	3.43961	0.400131	0	3.08891	3.12736	0	5.12368	2.1475	2.50022	2.18783		323.129	342.949
0.0325	20.3847	44.1468	28.6876	78.4691	9.03404	29.8878	64.3048	110.277	53.6189	42.4282	19.2581	32.7391	0.0325	10.9589	31.8384	67.0387	42.5737	21.9355	38.403	79.9708	104.547	5.81765	14.511	11.346	26.1414	0.0325	2.5314	1.07017	0	2.91112	3.36781	0	5.23764	2.16118	2.50022	2.23985		320.148	297.222
0.0335	22.2855	50.3711	27.8322	72.6916	9.07938	33.485	68.7789	108.436	48.8332	46.6069	16.5438	37.2989	0.0335	11.3028	37.2803	62.0976	42.108	27.0291	36.6491	78.1586	95.6384	5.83106	19.0884	13.3974	24.1642	0.0335	1.51962	2.30737	0	2.92353	3.12387	0	5.9481	2.17222	2.23908	1.91669		369.565	357.143
0.0345	25.1192	53.9427	26.9436	65.7794	11.5523	34.944	73.9185	102.706	44.5536	52.6633	15.0648	40.0699	0.0345	12.9406	38.7966	57.254	43.2211	33.1274	39.3769	74.3044	86.5259	5.56625	22.108	16.892	23.1532	0.0345	0.734155	4.04978	0	3.2397	2.67387	0	6.76863	2.5651	1.7798	1.30563		320.53	292.292
0.0355	29.1362	54.2931	26.398	58.3884	14.5536	36.4269	78.3727	99.0197	41.35	58.3105	15.829	39.7304	0.0355	15.3076	36.3987	52.8145	44.6365	38.5967	46.6343	69.7797	79.5038	4.93686	22.089	20.1382	22.5293	0.0355	0.282786	5.84644	0	3.66205	2.52321	0	7.45177	3.35222	1.31721	0.697063		372.979	319.286
0.0365	34.4541	52.0143	26.7387	50.6833	16.2227	39.0202	80.8992	99.8133	39.5726	62.4899	18.6463	37.3035	0.0365	18.247	32.4375	50.1088	46.797	42.968	56.2461	65.6734	75.5296	4.28534	19.3049	22.043	22.0075	0.0365	0.0863061	7.00556	0	3.79898	2.81161	0	8.05717	4.10449	1.10702	0.290279		24.9383	6.77083
0.0375	40.2173	47.9163	28.1608	43.2863	15.8366	41.4618	80.9672	101.613	39.543	65.6555	21.7434	34.4807	0.0375	21.5852	29.558	50.5558	50.4753	46.5482	64.4779	62.9906	74.0729	4.12701	15.1166	22.4744	21.9796	0.0375	0.0207212	7.00556	0	3.39661	3.16258	0	8.58446	4.4279	1.24723	0.0949594		42.5926	14.1667
0.0385	43.9142	43.4307	30.5222	37.6639	13.9378	41.4711	78.4507	98.2879	41.1096	69.174	23.0386	31.9846	0.0385	24.5229	28.5197	54.0055	54.9789	49.2167	68.5383	62.6663	73.4483	4.85176	11.1745	21.8335	23.325	0.0385	0.00445454	5.84644	0	2.53928	3.11314	0	8.81904	4.44637	1.55407	0.0285195		112.108	139.697
0.0395	42.9188	41.2841	33.4127	35.2965	11.4862	37.8134	73.4805	88.1642	43.3416	73.9673	22.0288	29.8949	0.0395	26.0026	28.3158	58.598	59.1221	50.3394	68.3096	64.7436	72.5025	6.58946	9.06936	20.5021	26.3562	0.0395	0.00393176	4.04978	0	1.55842	2.61686	0	8.63866	4.64135	1.69855	0.0285195		87.8889	83.3333
0.0405	37.398	44.2185	35.8497	36.2587	9.07306	31.3687	67.1591	76.6589	45.2118	79.2484	20.2408	29.026	0.0405	25.8172	27.9146	62.1697	63.4951	49.8243	65.1212	68.2009	71.9411	9.22457	9.86884	18.8128	29.8788	0.0405	0.0173122	2.30737	0	0.773939	2.07524	0	8.28007	5.19412	1.50214	0.0956789		204.409	143.333
0.0415	30.672	52.2392	36.3566	38.807	7.06874	24.5837	61.7334	70.3411	46.623	82.4842	19.6422	31.2086	0.0415	25.0949	27.1389	63.6844	69.9026	48.6677	59.457	71.9566	73.9137	12.4946	13.5004	17.3111	31.8432	0.0415	0.0684711	1.07017	0	0.307494	1.91791	0	8.14818	5.69299	1.09514	0.295691		415.632	394.444
0.0425	26.1542	61.7344	34.0992	41.0258	6.08396	19.7245	59.1696	69.7311	48.4982	81.081	20.6837	38.021	0.0425	25.4725	26.191	63.431	78.1564	48.1924	50.8659	75.5481	80.3724	16.1553	19.0361	16.6334	31.2991	0.0425	0.211951	0.400131	0	0.096849	2.21298	0	8.45809	5.59032	0.793909	0.724863		378.495	250.833
0.0435	24.6964	67.9458	29.8933	42.9414	6.67456	17.399	59.6389	69.8403	51.8262	74.6525	22.0834	49.0388	0.0435	27.6605	25.0343	62.1742	84.707	48.7856	39.9722	78.7169	90.8414	20.2104	26.0957	16.9694	29.3753	0.0435	0.512755	0.120317	0	0.0240303	2.65503	0	9.10552	4.80712	0.866996	1.41973		224	326.667
0.0445	25.0481	68.2314	25.5784	46.4524	8.49325	16.7693	61.7341	66.9645	56.5204	65.4225	22.3475	60.9107	0.0445	30.688	23.4522	60.4562	85.3113	49.5083	29.8546	81.0205	101.192	24.9195	35.6561	17.8695	28.0086	0.0445	0.979839	0.0335676	0	0.00529753	2.85552	0	9.69348	3.78387	1.40948	2.28207		407.011	480
0.0455	25.7457	63.1934	22.5454	52.9871	10.1591	16.8585	63.9556	62.7009	61.0605	56.362	21.1784	68.8306	0.0455	32.6467	21.6207	58.5233	78.7987	49.0866	24.8458	82.1644	106.23	30.2355	48.6319	18.7553	28.0166	0.0455	1.51222	0.0328706	0	0.00529753	2.63784	0	9.62302	3.02075	2.34318	3.15606		73.8272	5.87719
0.0465	26.0635	55.9012	21.3488	61.5356	10.3928	17.1037	65.6073	60.9564	63.3357	49.7281	19.664	70.0612	0.0465	32.3529	20.2767	56.2886	67.8293	47.3066	27.3692	82.2786	104.482	35.1822	63.2787	19.4823	28.4859	0.0465	1.98021	0.115075	0	0.0233259	2.14287	0.0014547	8.48772	2.63596	3.47191	3.98907		127.056	55.4955
0.0475	25.9867	50.6458	22.3347	69.0237	9.28806	16.8692	66.2928	62.8158	61.9807	47.4216	19.4238	65.9926	0.0475	30.3087	19.819	53.3611	56.2297	45.2583	35.6448	81.5575	99.1632	38.4098	74.615	20.239	27.7119	0.0475	2.38715	0.372503	0	0.0922558	1.70195	0.00948585	6.57054	2.35615	4.5429	4.80885		246.447	148.618
0.0485	25.8729	51.0204	25.8116	72.5607	8.18303	15.4317	65.3481	65.582	56.9714	51.2131	21.1536	60.4882	0.0485	28.1344	19.448	49.6646	46.3818	44.2253	45.0305	79.9229	94.2332	39.7651	77.5254	21.0282	24.8443	0.0485	2.83564	0.955791	0	0.284168	1.55609	0.0481731	4.73963	1.89462	5.28489	5.52467		125.94	81.626
0.0495	26.0555	57.1619	31.5252	71.6926	8.24152	13.0426	62.4483	65.9648	49.3517	61.2957	23.6409	56.946	0.0495	27.2143	17.8622	45.9497	39.0643	44.5788	51.9748	77.2863	91.4542	40.6875	71.206	21.5403	20.8659	0.0495	3.2565	1.93487	0	0.682388	1.64198	0.190528	3.71591	1.25854	5.49817	5.91996		20.8108	0.0833333
0.0505	26.7504	64.6266	38.5377	68.7337	9.49637	11.6933	58.1581	62.812	40.8704	74.8522	24.6686	56.9693	0.0505	27.7607	14.852	43.3156	34.2847	45.805	55.7643	73.8795	91.0689	42.4799	60.1918	21.5197	17.7335	0.0505	3.3277	3.09399	0	1.27815	1.66994	0.586869	3.58616	0.665268	5.24382	5.88193		241.667	204.271
0.0515	28.2575	67.5503	46.0283	67.032	11.3859	14.2395	53.0473	56.7577	33.7432	86.7369	23.2778	60.4847	0.0515	28.8451	11.9379	42.4465	31.4487	47.1908	56.3309	70.1456	92.7736	44.705	50.3579	21.0517	16.6401	0.0515	2.81903	3.91157	0	1.87633	1.43004	1.40782	3.99035	0.276835	4.9016	5.49077		38.1053	13.172
0.0525	30.9314	63.938	53.9107	68.7478	13.6845	22.4041	46.8863	48.8241	30.2598	92.0528	20.924	66.6052	0.0525	29.2391	11.4946	43.3981	29.7798	48.0808	52.5253	66.5387	95.1255	45.7703	44.0362	20.4741	17.5576	0.0525	1.90774	3.91157	0	2.19199	0.989118	2.63016	4.51323	0.094567	4.84658	4.87127		6.86469	-1.60494
0.0535	34.9619	57.3244	61.9566	73.6631	16.312	35.133	39.4751	40.4045	32.1399	89.0969	20.5475	75.2834	0.0535	28.405	15.0401	45.7937	29.4167	47.697	44.1742	63.3903	95.4061	44.5994	39.1493	20.1669	20.1834	0.0535	1.01528	3.09399	0	2.13718	0.589265	3.82686	4.83904	0.0503591	5.02063	4.12135		80.3741	49.5906
0.0545	40.1488	53.0503	68.2496	79.451	18.5303	48.5713	31.7295	33.5916	39.6778	81.1418	24.7898	87.8465	0.0545	26.7816	21.6412	49.1192	31.4432	45.3845	34.3956	60.75	91.1171	41.4906	32.5103	20.4012	24.5064	0.0545	0.422335	1.93487	0	1.95524	0.435426	4.33641	4.83718	0.121631	4.95453	3.40433		96.5657	62.0468
0.0555	45.4423	53.8818	69.6129	83.1109	19.231	58.2461	25.175	30.1147	51.0359	74.8402	34.3978	104.194	0.0555	25.1176	27.8431	52.8788	36.3037	41.3203	28.0758	58.5844	81.9668	37.9621	23.4164	21.2552	30.2009	0.0555	0.136942	0.955791	0	1.95524	0.605922	3.82686	4.72607	0.392648	4.26875	2.92537		64.3564	-18.3951
0.0565	48.8357	59.0897	64.4929	82.7682	18.2128	62.2301	20.5159	29.8661	62.5035	75.3983	47.3485	119.824	0.0565	23.7465	29.9841	56.3931	43.0075	36.6303	27.9853	57.2604	70.7221	35.791	14.0999	22.5869	35.985	0.0565	0.0346244	0.372503	0	2.13718	1.05574	2.63016	5.00002	1.04833	3.06671	2.71268		20.198	-25.4386
0.0575	48.6864	66.0479	54.9476	78.4961	16.6185	62.3347	17.2727	31.0763	70.3824	83.0732	59.8765	128.407	0.0575	22.7049	27.2494	58.5968	50.3747	32.5522	32.9816	57.3296	61.8156	35.5183	7.37424	23.9835	40.0934	0.0575	0.00681795	0.114378	0	2.19199	1.62774	1.40782	5.94091	2.26028	1.81117	2.55467		112.632	92.4167
0.0585	45.4525	72.2182	45.1278	71.5246	15.9095	62.008	14.8211	31.9451	73.7988	94.7791	69.2793	127.714	0.0585	22.213	22.2983	58.4319	58.0034	29.7678	39.5488	58.6528	58.3491	35.8633	4.67443	24.8146	41.3908	0.0585	0.00156835	0.0276283	0	1.87633	2.11441	0.586869	7.22645	3.96782	0.922586	2.28676		131.057	114.324
0.0595	41.5419	76.7837	38.1303	63.2205	16.6399	63.5408	13.2724	31.873	75.6639	107.914	75.6383	120.738	0.0595	22.516	18.797	55.6333	65.1641	28.5568	44.301	60.3289	60.0435	34.9887	6.0564	24.6668	39.8594	0.0595	0.00340898	0.00524235	0	1.27815	2.37672	0.190528	8.19266	5.73157	0.564606	2.04566		175.917	161.333
0.0605	39.3481	80.525	34.5529	55.2418	18.251	67.2382	13.1511	31.3713	79.6988	120.891	80.455	111.068	0.0605	23.2827	18.5967	51.1062	69.9647	28.8801	45.3584	61.871	64.134	32.1557	10.8436	23.8422	36.225	0.0605	0.017835	0.000697045	0	0.682388	2.37968	0.0481731	8.4486	6.8852	0.714351	2.09694		19.1453	8.16667
0.0615	39.7251	83.3403	33.3942	49.9477	19.8646	71.7753	14.6583	31.2406	86.311	130.825	84.1832	100.007	0.0615	23.6078	20.9511	46.6119	70.859	29.8951	42.707	63.879	68.1961	28.0529	17.5822	23.0908	31.4854	0.0615	0.0718801	0	0	0.284168	2.13214	0.00948585	8.08689	6.95202	1.27008	2.47883		228.158	247
0.0625	41.9254	82.5878	33.62	49.5534	21.2149	74.5302	17.5023	31.8132	92.4084	133.635	85.7374	88.9945	0.0625	22.7451	23.5493	44.0501	68.3196	30.047	38.1226	66.8662	71.7503	24.0633	24.0353	22.7321	26.6924	0.0625	0.228218	0	0	0.0922558	1.69893	0.0014547	7.37149	6.00259	2.04634	2.9593		78.5366	70.7207
0.0635	44.4384	75.547	34.8796	54.3566	22.9534	72.9444	21.0889	32.6208	95.2373	127.499	84.2446	82.2092	0.0635	20.6583	24.1496	44.4543	64.2088	28.333	34.3364	69.5537	75.3469	21.4616	28.184	22.4622	22.9454	0.0635	0.574408	0	0	0.0233259	1.27869	0	6.53425	4.62795	2.76717	3.31187		271.667	243.162
0.0645	46.2685	63.7145	37.156	62.0464	26.1715	66.7998	24.4367	32.8418	95.0378	114.765	80.6335	83.835	0.0645	17.8882	22.0029	47.0025	59.943	25.3834	33.3417	69.1827	78.9709	20.8452	29.5495	22.0861	21.3234	0.0645	1.15612	0	0	0.00459315	1.15946	0.000727351	5.99291	3.49485	3.186	3.48877		160.439	104.144
0.0655	47.909	53.1566	39.9284	69.192	31.3675	58.5292	26.1608	32.2989	93.8378	99.7691	76.836	92.6347	0.0655	15.1434	18.188	49.2617	55.7015	22.9681	35.0686	64.0371	81.8182	21.8417	29.4843	21.8342	22.218	0.0655	1.88122	0	0	0.000704382	1.54355	0.00474292	6.42545	2.84461	3.24083	3.53901		27.1044	12.3333
0.0665	50.7189	49.4862	41.7667	73.3588	37.5017	50.8259	25.2984	31.8923	92.8514	86.0954	73.5416	101.508	0.0665	13.0483	14.5183	49.3364	51.4079	22.4073	37.5011	55.3474	83.1915	23.2804	30.015	21.7015	24.6085	0.0665	2.50361	0.000697045	0	0	2.42895	0.0240866	8.22008	2.42742	3.05882	3.48949		88.5714	58.4
0.0675	55.0009	52.7812	41.2196	73.9643	42.2775	44.722	22.5383	32.842	91.5386	76.3431	69.588	103.697	0.0675	11.987	12.114	47.9876	48.3344	23.4845	38.0627	46.4309	83.1019	23.85	32.086	21.0093	26.8706	0.0675	2.75056	0.0045453	0	0	3.61758	0.0952642	10.8115	1.91346	2.7965	3.31656		6.66667	-7.07483
0.0685	59.0217	58.0598	38.3227	71.9797	43.7719	40.1244	20.185	35.6467	88.76	72.5872	63.7479	98.4763	0.0685	11.9915	10.9694	47.8978	48.9256	24.8824	35.5763	40.2379	81.9198	22.9139	34.8621	19.1344	28.5255	0.0685	2.50361	0.0230829	0	0	4.7564	0.293434	12.8146	1.26231	2.52097	2.98313		170.156	128.369
0.0695	60.1572	60.4911	34.7984	69.5801	41.7678	37.1999	20.3398	39.7439	84.5544	75.2408	56.3471	90.5234	0.0695	12.9023	10.5537	50.5556	54.1992	25.6018	31.5648	37.6863	79.7628	20.8703	36.8746	16.4779	30.2514	0.0695	1.88122	0.0912948	0	0	5.3843	0.703912	13.0326	0.665951	2.26897	2.57235		14.3894	17.7564
0.0705	56.9487	59.5228	32.4866	69.5277	37.5174	36.7179	23.1794	44.0492	80.5579	81.6755	49.0303	85.457	0.0705	14.7684	10.4446	54.378	61.6972	25.7008	29.2297	37.8219	76.3034	18.7225	37.8187	14.3178	32.1063	0.0705	1.15612	0.281208	0	0.000704382	5.13569	1.31508	11.4265	0.276152	2.11072	2.38252		5.96154	26.5942
0.0715	50.3059	58.0921	31.9105	73.5432	32.7369	39.594	27.1697	47.9294	78.3154	87.2993	43.7244	86.4993	0.0715	17.9753	10.4395	56.208	66.8512	25.6112	30.665	39.1122	70.9528	17.29	38.9527	13.7573	32.9974	0.0715	0.574408	0.674583	0	0.00459315	4.07109	1.91343	9.05559	0.0894317	2.04268	2.71817		123.832	78.9362
0.0725	43.209	58.7997	32.4146	80.5503	28.9695	46.3079	30.5766	51.5783	77.1198	89.0395	41.8094	93.1739	0.0725	22.713	10.4981	54.2849	66.4853	25.2681	35.1822	40.5089	63.493	16.7362	41.6291	14.9436	32.3215	0.0725	0.228741	1.26029	0	0.0233259	2.74345	2.1682	7.06743	0.0226119	1.90678	3.49418		4.9505	4.61538
0.0735	38.9841	61.305	33.3707	86.8405	27.1611	55.9875	32.4548	55.2798	74.2287	87.5277	43.4203	101.251	0.0735	28.2445	10.7583	49.5838	61.0175	24.4161	40.1234	41.636	55.2555	16.6481	45.5042	17.0808	31.1501	0.0735	0.0752891	1.83371	0	0.0922558	1.80566	1.91343	5.83632	0.00445254	1.5535	4.16194		91.2195	29.9074
0.0745	39.2423	62.9922	35.1644	88.7005	27.0769	65.5832	32.7258	58.7503	67.7745	85.3503	47.2155	104.583	0.0745	32.9438	11.5392	44.8545	53.7287	23.4188	42.6208	42.7181	49.6531	16.4034	48.4775	18.9378	31.2499	0.0745	0.0351472	2.07786	0	0.284168	1.54355	1.31508	5.08492	0.000682819	1.03532	4.18433		80.8148	46.1616
0.0755	43.1227	61.752	38.9932	85.383	27.2862	70.7713	32.062	61.8152	58.9043	83.7554	51.1345	99.4242	0.0755	35.2675	13.2941	42.8616	48.0548	22.9679	40.9828	44.4393	50.5506	15.5712	48.7148	19.5031	33.2965	0.0755	0.0718801	1.8344	0	0.681684	1.78328	0.703912	4.59017	0	0.547868	3.60684		128.254	93.2407
0.0765	48.1424	58.197	45.52	79.3959	26.4584	68.8394	31.4135	65.1882	50.5382	81.9228	53.7511	88.1521	0.0765	34.7703	16.2775	44.9343	45.291	23.0053	35.5717	47.2654	59.2489	14.1834	46.4473	18.5173	36.2887	0.0765	0.211429	1.26483	0	1.27355	2.15685	0.293434	4.49802	0	0.227419	3.07959		40.7317	7.15686
0.0775	51.5347	55.4545	53.7281	73.7069	25.0714	61.1491	31.0945	69.4802	44.6675	78.9324	55.1656	77.4448	0.0775	32.3095	19.9219	50.0954	44.7602	22.6838	28.8673	50.6858	72.6669	12.7708	43.2915	16.5408	38.3065	0.0775	0.505937	0.697666	0	1.85301	2.40492	0.0952642	4.95599	0	0.0736496	3.27888		104.118	46.2121
0.0785	51.4968	56.5833	61.1663	69.0008	25.4776	52.5606	30.6348	73.4764	41.3403	75.3202	56.3868	71.9261	0.0785	29.4006	22.8025	55.3385	45.8092	21.5593	24.1344	53.5969	84.762	12.151	40.0876	14.5212	37.5708	0.0785	0.945215	0.372503	0	2.09973	2.46563	0.0240866	5.70629	0	0.0191839	4.29849		219.753	148.98
0.0795	48.2654	61.4438	65.3894	64.1961	29.8092	47.9585	29.7245	74.7085	39.7393	72.6398	57.5083	70.9913	0.0795	27.2325	23.6774	57.4169	48.4814	20.1941	23.3659	55.4664	90.7552	13.0445	36.0683	13.221	33.6459	0.0795	1.3758	0.372503	0	1.85301	2.40398	0.00474292	6.21828	0	0.0073336	5.55099		173.131	186.667
0.0805	44.0658	66.1557	65.3295	59.1627	37.604	48.4933	28.7187	72.2539	39.4713	72.0451	57.0312	72.2314	0.0805	26.0043	22.6055	54.9444	51.9069	19.4262	26.0411	56.6378	90.4552	15.6638	30.3365	12.8057	28.4565	0.0805	1.56233	0.697666	0	1.27355	2.38005	0.000727351	6.13202	0	0.0191839	6.2494		143.75	163.457
0.0815	41.3824	66.5837	61.6289	55.8367	45.4249	50.7929	28.0488	67.7903	40.5882	73.2936	53.78	75.241	0.0815	25.0922	20.9575	49.0541	53.4899	19.4892	29.4757	57.4988	86.958	19.4216	23.6882	12.8153	25.3822	0.0815	1.396	1.26483	0	0.681684	2.61533	0	5.52345	0	0.0736496	6.04044		76.7308	43.7879
0.0825	41.007	62.5105	56.0054	56.3299	49.0004	50.481	27.64	63.1836	42.7175	75.0361	49.0425	80.3462	0.0825	23.8451	20.423	42.4602	50.9717	20.0626	30.622	57.9429	82.1278	23.0038	18.4472	12.622	26.2895	0.0825	1.031	1.8351	0	0.284168	3.2158	0	4.85601	0	0.227419	5.1918		100.897	77.8261
0.0835	41.7392	57.6595	50.3037	60.4062	46.3344	46.7471	27.168	58.1508	44.9396	76.0803	45.6534	85.7699	0.0835	22.1535	21.9785	37.9262	44.9861	20.8818	28.4544	57.6521	74.7054	25.0488	16.4681	12.1072	29.7427	0.0835	0.785314	2.08241	0	0.0922558	4.0277	0	4.74868	0.000682819	0.54843	4.18042		214.717	224.933
0.0845	41.8432	55.954	45.7074	64.9164	39.1724	42.6555	26.6943	51.3167	47.0194	76.1345	44.8811	88.3642	0.0845	20.3458	25.3879	36.9074	38.8832	21.9694	24.8422	56.4538	63.6428	25.1016	17.5971	11.902	32.5883	0.0845	0.927749	1.85679	0	0.0233259	4.77668	0	5.63577	0.00445254	1.03899	3.22575		365.247	344.667
0.0855	40.6641	58.5254	42.3346	65.9104	31.5584	41.0045	26.7962	43.0714	50.255	75.4263	45.2137	86.7197	0.0855	18.7872	29.206	39.1076	36.1562	23.3249	22.6569	54.5065	51.8137	23.8706	20.3349	12.7722	32.8037	0.0855	1.51962	1.35158	0	0.00459315	5.28818	0	7.42655	0.0226119	1.57156	2.3012		169.487	130.455
0.0865	38.9415	63.6461	39.4308	61.9077	27.0009	41.4538	27.9049	36.5658	56.1779	74.6007	44.8294	82.6353	0.0865	17.5952	31.2409	43.3766	38.3358	24.6549	23.1905	52.5522	44.648	22.4172	23.8879	14.6812	30.5443	0.0865	2.33833	0.955791	0	0.000704382	5.46145	0	9.42997	0.0894317	1.97789	1.4237		53.3333	-22
0.0875	38.0232	68.1917	36.3274	55.1423	26.8116	42.2455	29.551	35.7539	64.1519	75.1203	44.6037	79.6029	0.0875	16.639	29.6391	48.8522	44.8001	25.419	25.8066	51.6731	45.293	21.256	28.5983	16.5674	27.3349	0.0875	2.94049	0.956488	0	0	5.14695	0	10.7385	0.275469	2.25768	0.725582		12.5926	-1.2963
0.0885	39.0316	69.2539	33.5763	49.2571	30.3646	43.0144	30.6375	42.1289	70.6166	77.9619	47.5586	79.7428	0.0885	15.7824	24.2702	54.8378	53.3491	25.0744	29.6104	52.3443	51.9811	20.3271	33.9634	17.1965	24.8816	0.0885	2.95151	1.35613	0	0	4.25807	0	10.8647	0.660816	2.61485	0.295691		178.651	149.506
0.0895	42.1769	65.6032	32.7679	46.4585	36.0535	44.6663	30.6644	53.0354	71.3556	81.0519	55.3016	81.8277	0.0895	15.1239	17.2712	60.0386	60.7186	23.4506	34.6538	53.8139	59.574	19.4539	37.4474	16.2846	24.1122	0.0895	2.38897	1.87987	0	0	2.98264	0	10.0929	1.23457	3.18749	0.0949594		70.5442	23.1944
0.0905	46.2454	58.5526	34.733	47.3156	41.8252	47.8197	30.3738	63.3718	65.2584	79.935	65.7571	82.4373	0.0905	14.9283	11.8783	62.8714	63.9594	20.954	41.3372	54.6923	63.309	18.4796	36.4871	14.6754	24.6996	0.0905	1.66206	2.1737	0	0	1.72666	0	9.21684	1.79697	3.83612	0.0245471		103.922	87.8261
0.0915	49.0036	51.459	38.2729	51.8554	45.6374	52.8769	31.0346	69.378	56.0239	72.4569	74.3034	79.2602	0.0915	15.3741	10.4645	62.5339	62.2971	18.2805	48.7921	54.0343	61.995	17.2407	31.2848	13.4235	25.6114	0.0915	1.2233	2.11561	0	0	0.825915	0	8.89027	2.04127	4.3176	0.00938385		94.7436	85.5072
0.0925	48.8257	47.7823	41.2599	59.3528	46.5535	60.7079	33.4296	71.0457	49.4235	61.7102	76.6573	72.9293	0.0925	16.4965	13.4055	59.2215	57.2109	15.9488	54.2158	51.811	57.9961	15.7865	24.8379	12.9775	26.3282	0.0925	1.228	1.93487	0	0	0.37446	0	9.20182	1.8278	4.54858	0.0252666		71.8788	85.6061
0.0935	46.1446	48.7026	42.7075	67.7137	45.583	71.5122	37.4944	71.3132	48.3945	53.4897	71.432	66.1439	0.0935	18.3071	19.1931	53.6582	50.6441	14.1594	54.4792	48.766	53.8139	14.5365	20.4978	13.2869	27.2074	0.0935	1.47837	1.93487	0	0	0.307301	0	9.8262	1.36922	4.52682	0.0996513		64.3056	51.3889
0.0945	43.0273	52.4424	42.991	74.1429	44.6213	83.1236	42.3863	73.3674	51.017	51.4097	61.0909	62.314	0.0945	20.724	25.258	47.0392	43.982	12.9584	48.5996	46.1211	49.5341	14.0719	19.8037	14.2108	28.4362	0.0945	1.64759	2.11561	0	0.000704382	0.540369	0	10.4798	1.11515	4.14276	0.318799
0.0955	41.2432	56.508	42.3635	76.4625	44.3114	91.7201	46.7931	78.2754	53.0625	54.449	50.2923	64.6678	0.0955	23.3082	29.2211	40.9244	38.6084	12.3686	38.5992	44.9328	44.7383	14.8097	22.1137	15.5387	29.2865	0.0955	1.59012	2.1737	0	0.00459315	0.975417	0	11.0927	1.48722	3.33274	0.814411
0.0965	41.1299	60.3707	40.4767	74.079	43.5331	94.2271	49.6823	84.193	51.6373	58.3864	42.5137	74.0834	0.0965	25.3078	30.1361	36.4803	36.2128	12.3938	28.3653	45.2144	41.7241	16.8106	25.5267	16.9816	29.0338	0.0965	1.45167	1.87987	0	0.0233259	1.42762	0	11.5498	2.64563	2.35253	1.68546
0.0975	42.3571	64.8594	37.518	68.716	41.1398	89.711	50.9663	87.7397	46.5382	59.5708	38.045	86.7132	0.0975	26.1179	28.686	34.1173	37.7987	12.9467	21.6035	45.9211	44.2773	19.6481	27.8855	18.386	28.2086	0.0975	1.45115	1.35613	0	0.0922558	1.67396	0	11.464	4.28803	1.65489	2.87948
0.0985	44.8285	69.3003	34.6141	64.1334	37.6118	79.7552	51.0804	86.7165	39.6978	57.7744	35.2485	95.5849	0.0985	25.6	26.1724	34.0368	42.358	13.7631	19.8154	46.2409	52.6455	22.3745	27.4268	19.6398	28.2471	0.0985	1.58619	0.956488	0	0.284168	1.66669	0	10.4095	5.63247	1.47464	4.14289
0.0995	48.2777	71.0388	32.8663	63.7912	34.7502	68.4339	49.9487	81.541	34.1015	55.7623	33.2768	96.1435	0.0995	24.0041	23.6981	36.3536	46.9186	14.4427	21.6342	46.6452	61.4344	23.8688	23.7006	20.2917	29.9347	0.0995	1.62687	0.955791	0	0.681684	1.6622	0	8.4505	5.86788	1.62715	5.09207
0.1005	51.7572	68.4077	32.8572	67.8949	34.0086	60.5909	47.0754	73.928	32.2961	56.9194	33.0412	89.7822	0.1005	21.9369	22.2006	40.3085	48.6738	14.7516	24.4393	48.1925	63.8727	23.629	18.481	19.8129	32.2769	0.1005	1.39259	1.35158	0	1.27355	2.06163	0	6.31028	4.82713	1.7135	5.36721
0.1015	54.1263	62.968	34.8364	72.7243	35.3597	58.846	42.8251	65.3233	34.7811	63.398	35.7166	81.6377	0.1015	20.4125	22.4729	44.109	47.3225	14.9528	26.865	51.0112	58.0535	22.3179	15.0894	18.4312	32.762	0.1015	0.948624	1.85679	0	1.85301	3.11008	0	4.83032	3.12995	1.48663	4.85288
0.1025	54.576	58.23	38.2673	73.2103	37.7637	62.4064	38.676	57.4495	39.5995	74.9662	41.0118	75.9485	0.1025	20.3729	24.8708	46.16	44.8045	15.7087	29.4652	53.99	48.5474	21.3156	15.9347	17.1329	29.1851	0.1025	0.50646	2.0831	0	2.09973	4.70798	0	4.24715	1.5971	1.01839	3.87329
0.1035	52.5432	57.067	41.4755	67.0487	40.3147	68.6153	35.8709	53.0179	43.7058	88.2735	47.1404	74.0375	0.1035	21.7896	29.3235	46.1424	42.7594	17.497	32.9352	55.817	42.3615	21.5441	20.5333	16.5314	21.8309	0.1035	0.210906	1.83895	0	1.85301	6.39435	0	4.1306	0.64037	0.547868	3.10197
0.1045	47.9753	60.7029	42.8929	57.0667	42.3967	74.8539	34.5878	53.9891	45.0758	98.1368	51.9512	75.1959	0.1045	23.5326	35.3935	44.6024	41.0192	20.1024	36.2245	55.9494	43.8209	22.6502	26.0759	16.2422	13.5871	0.1045	0.0684711	1.28337	0	1.27355	7.49817	0	3.98874	0.201475	0.245478	3.10197
0.1055	42.0191	68.8807	42.5798	49.3072	43.2536	79.1776	34.6713	59.3878	43.8682	101.435	53.9465	77.5778	0.1055	24.5133	41.6721	41.8737	38.5388	22.7333	36.902	54.6576	52.4579	23.2884	29.9805	15.6926	7.74402	0.1055	0.017835	0.765878	0	0.681684	7.49817	0	3.74484	0.0503591	0.147299	3.87329
0.1065	36.7405	79.7222	41.8281	48.2264	42.5916	80.4693	36.2175	65.9024	41.9672	99.9323	52.8416	78.7207	0.1065	24.7336	45.4287	37.7799	34.927	24.6339	33.3552	52.3308	63.932	22.2497	31.8185	15.0282	6.02621	0.1065	0.00681795	0.562416	0	0.284168	6.39435	0	3.61537	0.0140404	0.245478	4.85288
0.1075	33.6807	89.6998	41.4522	53.4719	41.4928	78.9371	38.9435	70.9573	41.624	98.2946	49.6003	77.2182	0.1075	24.7973	44.1351	32.1968	30.916	25.5438	26.4704	48.733	72.1362	19.4347	33.0365	14.7905	8.40007	0.1075	0.0183578	0.766575	0	0.0922558	4.70798	0	3.71761	0.0239775	0.548993	5.36721
0.1085	32.9328	94.9465	41.0526	60.6651	41.5141	76.1768	41.6619	75.0047	44.0511	99.1603	45.7055	74.3254	0.1085	24.5742	37.7822	25.5673	27.8993	25.6627	19.1547	43.1269	71.8209	15.798	35.3258	15.0826	13.6064	0.1085	0.0718801	1.28791	0	0.0233259	3.11061	0	3.86633	0.0894317	1.0246	5.09207
0.1095	33.5957	93.3432	39.9589	64.915	42.7269	73.8428	43.0035	80.3237	48.6117	100.961	42.1148	72.6742	0.1095	23.0051	29.2213	18.8386	26.812	25.274	14.2418	35.381	61.5098	12.5102	38.919	15.447	19.4799	0.1095	0.228218	1.86133	0.000567087	0.00459315	2.06513	0	3.7036	0.275469	1.51654	4.14289
0.1105	34.6423	85.6231	38.5534	64.1606	43.5114	72.0587	42.551	87.4347	53.2475	100.578	38.9026	73.0627	0.1105	19.4371	21.9818	12.9729	27.1421	24.3361	12.5976	26.7987	44.9358	10.3711	41.69	15.33	23.5787	0.1105	0.574408	2.16985	0.00426496	0.000704382	1.681	0	3.06119	0.661498	1.82356	2.87948
0.1115	35.3148	74.5293	38.3512	59.8169	42.2872	69.548	41.1992	93.6413	56.1497	97.0226	35.8551	73.3946	0.1115	14.6582	17.7518	8.49447	27.42	22.3942	12.8985	19.4284	29.1506	9.79104	40.3082	14.4396	24.454	0.1115	1.15612	2.11491	0.0224772	0.00140876	1.74379	0.000727351	2.19138	1.23902	1.93301	1.68546
0.1125	35.2262	63.0526	40.4667	54.6701	38.8579	65.1854	40.6895	95.9228	57.0619	91.9778	33.3021	71.2078	0.1125	10.2773	15.7164	5.44944	26.7349	19.1191	12.9997	14.4818	20.1268	10.7483	33.2857	12.8498	22.6705	0.1125	1.88122	1.93487	0.0930531	0.0091863	1.92539	0.00474292	1.56466	1.8189	2.1051	0.81513
0.1135	34.4718	53.5869	43.9896	50.8337	34.3896	59.255	42.5552	94.236	56.6679	87.4632	32.2337	66.8933	0.1135	7.39798	14.1669	3.65624	25.212	15.0675	11.5446	11.6514	19.14	12.5513	22.8003	10.9357	20.4157	0.1135	2.50361	1.93487	0.303053	0.0466519	2.08539	0.0240866	1.45024	2.12489	2.5776	0.323491
0.1145	33.5272	48.1085	46.3632	49.463	30.6651	53.619	46.8277	90.8279	55.2026	83.8281	33.4203	63.8257	0.1145	6.16586	12.6089	2.86209	23.1927	11.6306	8.62021	9.94824	22.5184	14.0315	13.0547	9.16409	19.7468	0.1145	2.7516	2.11491	0.777592	0.185216	2.37123	0.0952642	1.73775	2.07175	3.18544	0.123479
0.1155	32.6952	47.863	45.7692	50.6444	29.0484	50.6128	51.6165	87.1448	52.5576	80.183	36.2794	65.0427	0.1155	6.21364	12.0415	2.77255	20.8006	9.96149	5.30788	8.83489	24.8808	14.3322	7.27152	7.90835	20.9899	0.1155	2.51095	2.16916	1.57413	0.572929	2.96413	0.293434	2.11945	1.89538	3.42616	0.118787
0.1165	31.568	52.2595	42.7378	52.8784	29.5496	51.2638	54.3872	82.9563	49.5473	76.3882	39.0222	70.3609	0.1165	7.11628	13.2962	3.13473	18.3179	10.0275	2.73856	8.34263	23.4789	13.5294	6.55444	7.45571	22.785	0.1165	1.91925	1.85679	2.51715	1.38669	3.75455	0.703912	2.36705	1.89538	2.97721	0.294971
0.1175	29.4555	58.2314	39.0567	54.1838	30.8436	54.7577	53.8085	78.1932	47.8908	73.8832	40.3883	77.2506	0.1175	8.44757	15.793	3.75261	16.428	10.7841	1.53016	8.38723	19.7236	12.4306	10.4948	8.0209	23.4594	0.1175	1.3109	1.26483	3.18229	2.63936	4.33043	1.31508	2.43024	2.07175	2.03707	0.697063
0.1185	26.621	61.4681	35.8164	54.3549	31.3909	59.9448	50.4434	73.5874	48.3787	74.2587	40.8365	83.4761	0.1185	9.74269	18.1721	4.34551	15.9861	11.1419	2.00029	8.4452	16.4456	11.8601	17.4492	9.56176	22.4197	0.1185	1.0681	0.675977	3.18229	3.99018	4.31745	1.91343	2.38305	2.12489	1.08896	1.30094
0.1195	24.7302	59.6967	33.1895	54.9938	30.6397	66.5157	46.171	69.2858	49.5964	77.2883	41.4774	87.6621	0.1195	10.6587	19.5775	4.54304	17.5881	10.7069	4.65126	8.02804	14.6085	12.1925	24.3548	11.6009	20.7188	0.1195	1.46831	0.28645	2.51715	4.88115	3.77008	2.16893	2.40815	1.8189	0.453714	1.89286
0.1205	25.7465	55.2881	31.3151	57.3426	29.5274	73.9151	43.1057	64.8488	49.1496	80.8637	42.457	88.4325	0.1205	11.1583	19.9513	4.2007	20.9745	9.81287	10.0079	7.17632	13.387	13.3261	27.7887	13.3803	20.1588	0.1205	2.53724	0.118923	1.57413	4.97957	3.18846	1.9189	2.76926	1.23902	0.147299	2.14489
0.1215	30.4009	53.5026	30.3196	61.5294	30.0393	79.8823	42.597	61.1438	46.126	82.7911	43.1772	85.093	0.1215	11.4346	19.6547	3.6693	24.8938	9.15704	17.5752	6.29266	12.5022	14.7136	26.3367	14.273	21.1723	0.1215	3.92792	0.137461	0.777592	4.40011	3.04207	1.34391	3.60607	0.661498	0.0372431	1.89286
0.1225	37.5899	57.2882	29.8	67.7004	33.7375	81.3518	44.6177	60.6014	42.0116	82.291	43.4669	79.2172	0.1225	11.7512	19.3871	3.61365	28.1903	9.40352	25.0779	5.65432	12.9475	15.4757	21.5963	14.1282	21.8613	0.1225	5.01977	0.377048	0.303053	3.4631	3.26624	0.823263	4.70437	0.275469	0.00789592	1.30166
0.1235	44.9093	64.4433	29.1591	76.0925	40.2383	77.4253	47.7274	65.0394	39.2849	80.2521	43.5144	74.1258	0.1235	12.4853	20.1628	4.52416	31.0302	10.7885	29.5272	5.24684	15.2588	14.9599	16.3717	13.2882	19.9752	0.1235	5.32998	0.956488	0.0930531	2.42134	3.33531	0.682133	5.57764	0.0894317	0.00479144	0.701035
0.1245	49.9807	70.6017	28.3841	85.4878	47.3404	71.1726	49.7272	73.6879	39.3295	78.353	42.9717	72.2705	0.1245	14.1411	22.7136	6.41162	34.2593	12.9129	29.622	4.9381	18.0677	13.4782	12.3906	12.2334	15.6704	0.1245	4.88756	1.93487	0.0224772	1.45947	2.85256	1.09261	5.82396	0.0226119	0.0186215	0.314826
0.1255	51.7552	74.1486	28.0195	92.4869	52.9267	67.6384	48.9779	83.286	41.5437	77.5318	41.2915	73.5495	0.1255	17.0912	26.6204	8.93624	37.5467	15.0319	26.8394	4.71755	19.1409	12.345	10.2491	11.1622	11.5996	0.1255	4.16623	3.09399	0.00426496	0.737522	1.94278	2.04308	5.38232	0.00445254	0.0736496	0.193172
0.1265	50.7548	77.1672	28.5373	92.8426	56.3727	69.495	45.6364	90.1706	44.1149	77.1794	39.022	76.132	0.1265	21.2818	30.2277	11.7303	39.2882	16.6136	23.845	4.79158	17.5648	12.9011	10.6663	9.96144	10.5316	0.1265	3.7115	3.91157	0.000567087	0.340006	1.03723	3.23326	4.48279	0.000682819	0.226857	0.338654
0.1275	48.22	82.01	30.1173	84.0599	58.024	74.8945	41.5578	92.7591	45.6872	76.1094	37.7002	78.3713	0.1275	26.1287	31.955	14.5729	38.8829	17.4569	22.1699	5.38094	14.2919	15.3672	14.4801	8.55782	13.4113	0.1275	3.85178	3.91226	0	0.278176	0.431935	4.08236	3.45284	0	0.544201	0.799967
0.1285	45.3028	88.1173	32.8358	67.8918	58.2198	79.7877	38.6091	92.0865	46.4093	74.1104	38.0923	79.6523	0.1285	30.6546	32.0516	17.4062	38.2113	17.4435	21.7266	6.3864	10.7972	18.6945	21.4183	7.18892	19.2988	0.1285	4.61713	3.09923	0	0.591662	0.140229	4.08163	2.62071	0	1.0167	1.61577
0.1295	42.8916	92.2092	36.5235	50.5759	57.2605	81.8365	36.988	90.1353	47.1885	72.4864	39.3587	79.5742	0.1295	33.9627	32.6937	20.4013	39.8586	16.6105	22.1496	7.3562	8.08987	21.5225	29.8325	6.35274	26.2726	0.1295	5.79849	1.9625	0	1.36866	0.0354554	3.22851	2.2784	0	1.47929	2.68344
0.1305	41.5542	91.0327	40.4172	39.4205	55.5578	81.5695	35.3862	88.3609	48.003	73.28	40.2835	77.0828	0.1305	35.8247	35.7971	23.9098	44.0305	15.3873	23.7932	7.81773	6.91786	23.2238	37.8683	6.49604	32.3643	0.1305	7.05796	1.07017	0	2.5524	0.00698158	2.01899	2.52311	0	1.67682	3.73611
0.1315	41.245	84.0779	43.4709	37.9918	53.4597	80.3054	32.7774	87.3737	47.7478	77.3622	40.4842	71.2317	0.1315	36.7438	40.9215	27.9236	47.9959	14.4148	26.9593	7.56797	7.84683	24.1297	44.1959	7.60222	36.2799	0.1315	8.0011	0.745703	0.000567087	3.73005	0.00160599	0.998074	3.0752	0	1.48296	4.48278
0.1325	41.2701	74.2915	45.2035	44.1482	51.2794	78.1835	29.66	86.6877	46.1838	82.5507	40.0483	62.69	0.1325	37.4424	45.7504	31.433	48.8257	14.1551	30.7738	6.72287	10.6746	25.0513	47.7625	9.03913	37.645	0.1325	8.25199	1.07471	0.00426496	4.29632	0.00349079	0.393441	3.4274	0	1.03532	4.75146
0.1335	40.9847	66.1025	45.9047	52.4333	49.5219	74.7666	27.3722	84.6998	45.2262	84.3247	38.7589	53.9337	0.1335	38.304	48.2516	32.7912	46.279	14.7377	33.8654	5.64282	14.2626	26.6941	48.2253	10.0182	36.5648	0.1335	7.66847	1.98558	0.0224772	4.01351	0.018263	0.144165	3.30355	0	0.618975	4.50589
0.1345	40.5555	62.1147	46.0412	58.577	48.5748	71.1757	26.7539	80.1035	47.3308	79.8078	36.4051	47.6502	0.1345	39.0353	47.7367	31.1839	42.7383	15.8775	35.8915	4.76285	17.3668	29.3041	46.6841	10.3728	33.2732	0.1345	6.5491	3.19053	0.0930531	3.32104	0.0736052	0.128837	2.87886	0	0.461047	3.83035
0.1355	40.6466	61.1729	46.0208	62.3836	48.1182	70.6205	27.8918	73.8324	52.796	71.0126	33.6175	44.9693	0.1355	38.5793	44.4979	27.5895	40.6783	16.9258	37.2675	4.33489	19.3934	32.5549	44.4098	10.8014	28.4038	0.1355	5.43503	4.19347	0.303053	2.92109	0.234231	0.322991	2.47549	0	0.655094	2.97444
0.1365	41.3009	59.9553	46.5047	66.4062	47.2748	75.5421	30.6868	68.8505	59.219	63.3294	31.7885	45.0317	0.1365	35.6209	39.6584	23.962	40.488	17.422	37.7407	4.26184	20.0937	35.6376	40.8347	12.1249	23.0504	0.1365	4.63177	4.58615	0.777592	3.10303	0.59222	0.799904	2.20837	0	1.18262	2.31608
0.1375	41.5833	56.9234	48.025	71.8035	45.293	84.2249	34.9403	67.3945	63.5225	60.8932	32.0072	45.7525	0.1375	29.7315	35.0698	21.5624	40.375	17.6216	36.7252	4.25317	19.051	37.726	34.4386	14.2644	18.1291	0.1375	4.081	4.35428	1.57413	3.5585	1.20509	1.60852	2.03405	0.000682819	1.93723	2.12004
0.1385	40.5009	54.1405	49.8001	76.087	41.831	91.6117	39.8641	68.6436	64.1669	63.8372	34.163	45.1147	0.1385	22.1609	32.1399	20.2738	37.9927	18.0395	34.9673	4.21869	16.1702	38.643	25.7509	16.2005	14.0678	0.1385	3.68726	3.76857	2.51715	3.75726	2.01474	2.61734	1.94021	0.00445254	2.76889	2.30192
0.1395	37.9918	54.782	49.7858	75.5305	37.133	94.2823	44.0889	69.4924	61.5033	69.4091	37.0882	42.9266	0.1395	15.2295	30.7437	19.2617	32.494	18.48	34.2071	4.42154	12.5536	38.9117	18.0316	17.2041	11.4723	0.1395	3.52859	3.03365	3.18229	3.4058	2.85327	3.48328	1.90343	0.0226119	3.53132	2.5341
0.1405	34.8865	59.9343	46.9286	69.4747	32.5057	93.553	46.549	67.6123	56.7138	74.5004	39.6477	41.7813	0.1405	10.7752	29.6413	17.8981	25.326	18.0019	34.9473	5.13015	10.1574	38.9171	14.5369	17.8621	11.6311	0.1405	3.72201	2.20621	3.18229	2.62836	3.56835	3.82686	1.78825	0.0894317	4.04894	2.61375
0.1415	32.2182	68.3892	42.9568	61.515	30.0723	92.8804	47.1186	63.7385	51.102	77.3084	41.6481	45.3625	0.1415	9.14186	27.5264	16.0683	19.0242	15.9873	35.8352	6.2389	10.1553	38.2228	15.7329	19.3028	15.5307	0.1415	4.2716	1.37466	2.51771	1.84189	4.11979	3.48328	1.47653	0.275469	4.12414	2.60729
0.1425	30.8126	78.1243	40.859	56.1835	31.194	93.2392	46.2507	61.1638	46.1053	78.0069	43.5515	54.937	0.1425	9.49314	23.7933	14.0025	15.278	13.0123	35.4731	7.40036	11.7446	36.042	19.2371	21.4142	22.103	0.1425	5.05816	0.702211	1.57783	1.45562	4.51905	2.61734	1.06	0.660816	3.73331	2.59533
0.1435	31.2188	86.9276	41.641	54.6962	35.3221	92.3168	44.5708	63.1473	43.0579	78.1193	45.5752	67.7977	0.1435	10.9066	19.295	12.1505	13.9565	10.4506	33.8677	8.49349	12.9327	32.359	22.1336	22.578	28.0914	0.1435	5.82934	0.28645	0.796372	1.58105	4.70952	1.60852	0.812382	1.23457	3.14238	2.46369
0.1445	33.4014	92.3413	43.3781	54.2501	40.6755	87.7203	43.0501	70.4334	42.3376	78.6235	47.427	79.3536	0.1445	12.9765	16.2779	11.0415	13.4824	9.19844	32.0098	9.84376	12.6232	28.3493	23.3735	21.4508	30.5209	0.1445	6.24384	0.0919919	0.377327	1.94986	4.5779	0.799177	1.00459	1.79628	2.66053	2.10588
0.1455	36.3292	92.1749	43.4444	51.5615	45.4303	79.6325	42.6518	80.3983	42.7592	79.1179	48.5424	86.3462	0.1455	15.3519	16.3995	10.9465	12.2038	8.89549	30.6953	11.872	11.6145	25.4701	23.9596	18.4568	29.1606	0.1455	6.10848	0.0230829	0.321832	2.12376	4.08828	0.317521	1.74416	2.03546	2.36416	1.71398
0.1465	38.1632	85.6607	40.8524	46.4198	47.8548	70.062	43.0965	87.9669	42.0703	78.7264	47.9296	87.8624	0.1465	17.1469	18.5652	11.6584	9.81932	8.52078	29.9946	14.4393	11.4111	24.06	24.8083	15.3226	25.9602	0.1465	5.58605	0.0045453	0.57129	1.8576	3.37135	0.100007	2.86614	1.79697	2.18998	1.71149
0.1475	37.1649	73.9823	36.1917	40.9071	46.173	60.2946	42.4353	87.9144	38.3423	76.2927	44.194	83.9382	0.1475	17.3635	19.6116	12.675	7.50215	7.60834	29.5105	16.6708	12.6142	22.9666	25.1049	13.6384	22.6225	0.1475	5.03852	0.000697045	1.02958	1.27426	2.67868	0.0248139	3.91392	1.23902	2.1443	2.38252
0.1485	32.6566	59.3373	30.183	35.8499	39.5006	49.7823	38.4526	77.7393	31.2443	69.7194	36.6623	74.304	0.1485	15.9104	17.5841	13.4755	6.54454	6.60833	28.7328	17.6681	14.7452	20.8386	23.4511	13.9697	19.7269	0.1485	4.64136	0	1.4924	0.681684	2.22537	0.00474292	4.35028	0.683428	2.25768	3.57904
0.1495	25.3622	43.6854	23.1481	29.8444	29.1139	37.6807	30.632	59.426	22.2471	57.3015	26.5281	59.1867	0.1495	13.8043	13.7545	13.6688	7.1161	6.19201	27.1415	17.3843	16.9304	17.7203	20.0019	15.8167	17.496	0.1495	4.23015	0	1.69046	0.284168	2.01581	0.000727351	3.94433	0.364901	2.449	4.76261
													0.1505	12.2669	11.063	13.153	8.48465	6.55996	24.4706	16.606	18.2569	14.9775	16.4532	18.0515	16.0782	0.1505	3.54323	0	1.49183	0.0922558	1.83996	0	2.98671	0.364901	2.57331	5.36721
													0.1515	11.7946	11.2834	12.1797	10.1364	7.40159	21.1337	16.1246	17.9949	13.7612	14.3245	19.5236	15.2723	0.1515	2.55553	0	1.02532	0.0240303	1.51788	0	2.10028	0.683428	2.5338	5.18162
													0.1525	12.1411	14.1851	11.1201	12.3087	8.22605	18.1909	16.0936	16.076	14.1287	14.1516	19.5502	14.8385	0.1525	1.5246	0	0.548813	0.0091863	1.12639	0.000727351	1.81187	1.23902	2.30144	4.43317
													0.1535	13.0134	18.6799	10.2389	15.3992	8.75117	16.7027	16.1518	13.1556	15.5509	15.8333	18.1427	14.9399	0.1535	0.738087	0	0.228779	0.0247347	0.953506	0.00474292	2.20778	1.79697	1.95219	3.58052
													0.1545	14.4471	23.8961	9.75594	19.06	9.1276	16.934	15.9568	9.95975	17.4083	18.7552	15.9662	15.6924	0.1545	0.300098	0	0.0742738	0.096849	1.25266	0.0240866	2.87956	2.03546	1.7082	3.01023
													0.1555	16.2964	29.1452	9.87106	21.9448	9.74476	18.1571	15.4573	6.89784	18.8162	21.8302	14.0536	16.4959	0.1555	0.1553	0	0.0187793	0.307494	2.00591	0.0952642	3.23228	1.79628	1.80751	2.80151
													0.1565	17.7343	33.3414	10.5619	22.4525	10.7621	19.5058	14.7441	4.34461	18.7978	24.4208	13.3151	16.4913	0.1565	0.235036	0	0.00426496	0.775348	2.8343	0.294162	2.99218	1.23525	2.26135	2.75397
													0.1575	17.8164	34.8643	11.5134	19.965	11.8703	20.9372	13.9196	2.83102	17.1878	27.2844	14.088	15.6669	0.1575	0.527181	0	0.00483205	1.56691	3.19509	0.708655	2.43321	0.665268	2.80441	2.68885
													0.1585	16.5132	32.6087	12.3502	15.4189	12.4729	22.8817	13.1917	2.72437	14.9875	31.579	15.9312	14.8172	0.1585	1.01421	0	0.0224772	2.58134	2.81711	1.33917	2.04204	0.298081	3.1245	2.62643
													0.1595	14.7799	27.5023	12.8239	10.7053	12.1258	25.1543	12.7956	3.82017	13.3858	36.5447	17.7457	14.3823	0.1595	1.58619	0	0.0936202	3.5578	1.9358	2.0087	2.02724	0.178863	3.1509	2.59389
													0.1605	13.5941	22.2019	12.8151	7.57954	10.9899	26.8559	12.6332	5.24467	12.5865	39.3458	18.3238	13.9849	0.1605	2.06433	0	0.307318	4.27435	1.03616	2.46164	2.23606	0.298081	3.11612	2.43661
													0.1615	13.2283	18.6306	12.3855	6.84182	9.87426	27.0948	12.2119	5.89651	11.8869	38.084	17.1963	13.3232	0.1615	2.32049	0	0.80007	4.73665	0.431935	2.61734	2.44267	0.665268	3.29558	1.99179
													0.1625	13.3883	16.5478	11.8321	8.03421	9.60382	25.4642	11.1816	5.27033	10.7371	34.0799	15.067	13.0288	0.1625	2.32049	0	1.66718	5.0818	0.140229	2.63016	2.5582	1.23525	3.65008	1.3486
													0.1635	13.7044	15.0795	11.4772	9.78878	10.2154	22.3222	9.79808	3.94658	9.32775	30.5379	13.267	14.1497	0.1635	2.06486	0	2.8202	5.26444	0.0354554	2.61734	2.59156	1.79628	3.82485	0.795275
													0.1645	14.0241	14.5856	11.3133	10.7471	10.913	18.9291	8.67571	3.21622	8.1497	29.8427	12.7095	16.8721	0.1645	1.58959	0.000697045	3.95988	4.978	0.00698158	2.46164	2.55133	2.03546	3.5801	0.581278
													0.1655	14.3963	16.0153	10.9604	10.49	10.9742	16.7483	8.16141	4.29953	7.3826	32.3212	13.3596	20.3164	0.1655	1.031	0.0045453	4.75642	4.03684	0.00107066	2.0087	2.40778	1.79628	3.06929	0.790583
													0.1665	14.8252	19.1838	10.0743	9.7829	10.603	16.3482	8.04153	7.69081	6.92815	36.2606	14.5264	23.6565	0.1665	0.59172	0.0230829	5.03429	2.73621	0	1.33917	2.09804	1.23457	2.57136	1.32477
													0.1675	15.0568	22.746	8.78014	9.81955	10.6919	17.2432	7.81386	12.6174	6.79102	38.8349	15.5093	26.6883	0.1675	0.425221	0.0912948	4.75642	1.67157	0	0.708655	1.60264	0.660816	2.1311	1.89755
													0.1685	14.7523	25.5291	7.63204	10.9241	11.7608	18.6473	7.16484	17.0288	7.12061	38.3507	16.1015	29.1555	0.1685	0.575454	0.281208	3.95988	1.25461	0	0.294162	1.02563	0.275469	1.63026	2.14633
													0.1695	13.9023	27.0426	7.17154	12.0379	13.3606	19.9465	6.18791	18.818	7.94526	35.8735	16.6811	30.4774	0.1695	0.966459	0.674583	2.8202	1.45947	0	0.0952642	0.545345	0.0894317	1.07257	1.89755
													0.1705	12.9186	26.9876	7.62232	11.8562	14.5784	20.7216	5.27038	17.472	9.09921	33.6974	17.7112	30.4145	0.1705	1.39941	1.26029	1.66718	1.90425	0	0.0240866	0.288449	0.0226119	0.625184	1.32477
													0.1715	12.2449	25.2775	8.94713	10.5234	14.9142	20.9805	4.873	14.1991	10.4485	32.4031	18.9831	29.3362	0.1715	1.64522	1.8344	0.80007	2.13225	0.00053533	0.00474292	0.299552	0.00445254	0.454838	0.790583
													0.1725	11.9443	22.6317	10.9598	9.81772	14.5463	21.2753	5.34799	10.4723	12.0216	30.741	19.513	27.7708	0.1725	1.65807	2.08241	0.307318	1.94667	0.00349079	0.000727351	0.596906	0.000682819	0.617851	0.580558
													0.1735	11.6476	20.2967	13.3136	11.4964	13.9723	21.944	6.73304	7.0381	13.7731	28.2809	18.4647	26.1494	0.1735	1.67989	1.85679	0.0936202	1.55772	0.018263	0	1.17315	0.000682819	1.03532	0.790583
													0.1745	10.8887	18.8823	15.5371	15.6063	13.6247	22.3199	8.60795	4.21916	15.2624	26.7165	16.106	24.8794	0.1745	2.02897	1.35158	0.0230443	1.36478	0.0752112	0	1.92088	0.00445254	1.48296	1.32477
													0.1755	9.61179	17.9205	17.1508	20.496	13.6885	21.4333	10.2945	2.38367	15.7939	28.1206	13.6491	24.3191	0.1755	2.76014	0.955791	0.00796283	1.56691	0.244168	0	2.62723	0.0226119	1.67682	1.89755
													0.1765	8.43085	16.8273	17.771	24.3479	13.9814	19.4556	11.3789	1.93858	14.9856	32.7164	12.1713	24.4741	0.1765	3.58101	0.955791	0.0193464	1.99192	0.641912	0	3.12333	0.0894317	1.47929	2.14561
													0.1775	8.27314	16.0355	17.2142	26.504	13.967	17.736	12.0176	3.22015	13.1615	38.5815	11.905	24.7669	0.1775	4.13124	1.35158	0.0748409	2.30757	1.3977	0	3.46181	0.275469	1.01726	1.89286
													0.1785	9.61073	16.7782	15.6111	27.322	13.0749	17.2698	12.6255	6.33517	11.1971	42.8391	12.5285	24.2676	0.1785	4.30874	1.85679	0.232477	2.42594	2.592	0	3.88598	0.660816	0.547868	1.30094
													0.1795	12.0169	19.6843	13.4378	27.1041	11.247	17.6451	13.2949	10.7187	10.0109	43.1507	13.7064	22.4985	0.1795	4.30654	2.08241	0.567592	2.63762	4.18859	0	4.52566	1.23457	0.245478	0.696343
													0.1805	14.4618	23.7822	11.4016	25.6687	9.2887	17.892	13.6896	14.8626	10.0171	39.0444	15.1145	20.243	0.1805	4.41351	1.8344	1.09959	3.22879	5.94027	0	5.13491	1.79628	0.147299	0.290999
													0.1815	15.983	26.9927	10.147	23.0499	8.51061	17.9146	13.5529	17.0159	10.8408	32.2566	16.2818	19.1866	0.1815	4.81537	1.26029	1.72061	3.99018	7.32785	0	5.27081	2.03546	0.245478	0.0989318
													0.1825	16.1836	27.713	9.86543	20.1051	9.71339	18.369	13.1194	16.5115	11.6566	25.5583	16.9181	20.2326	0.1825	5.47928	0.674583	2.23928	4.29172	7.7695	0.000727351	4.76795	1.79628	0.547868	0.0476551
													0.1835	15.3491	25.9761	10.1006	18.0492	12.4009	19.3295	12.8378	14.2268	12.0289	21.095	17.3981	22.4475	0.1835	6.13549	0.281208	2.51771	3.72934	7.10363	0.00474292	3.89282	1.23457	1.01726	0.0989318
													0.1845	14.1287	22.9703	10.0521	17.5559	15.0212	19.9805	12.768	11.5798	12.3496	19.5503	18.4815	24.0881	0.1845	6.47206	0.0912948	2.52084	2.5517	5.82523	0.0240866	3.0434	0.660816	1.47929	0.290999
													0.1855	12.965	19.641	9.26239	18.3224	16.043	19.6335	12.47	9.4189	13.2047	20.2983	20.324	24.2899	0.1855	6.44861	0.0230829	2.25862	1.36478	4.69993	0.0952642	2.49461	0.275469	1.67626	0.696343
													0.1865	11.8984	16.2946	8.13086	19.1785	14.9376	18.3475	11.5218	8.22022	14.4344	22.3731	21.9786	23.5088	0.1865	6.33941	0.0045453	1.79915	0.572929	4.13571	0.293434	2.41137	0.0894317	1.47985	1.30094
													0.1875	10.9379	13.4788	7.74608	18.7498	12.3882	16.5765	10.0293	8.8354	15.2017	25.6359	22.0961	22.8024	0.1875	6.38226	0.000697045	1.35142	0.207838	3.96727	0.703912	2.86942	0.0226119	1.02037	1.89286
													0.1885	10.3438	12.2692	9.07266	16.5958	9.7239	14.9839	8.59922	12.1361	15.0112	30.6404	20.0932	22.8664	0.1885	6.46737	0	1.21316	0.138908	3.7983	1.31508	3.76313	0.00445254	0.563385	2.14633
													0.1895	10.4235	13.1692	12.0717	13.9349	8.10127	14.6814	7.88201	17.7459	14.301	37.0029	16.6292	23.542	0.1895	6.25155	0	1.57963	0.293354	3.44294	1.91343	4.74812	0.000682819	0.304173	1.90224
													0.1905	11.2483	15.2757	15.4226	12.8521	7.978	16.7604	8.22666	23.7008	13.8678	42.8784	13.0687	24.2627	0.1905	5.55626	0	2.41854	0.683797	2.98371	2.1682	5.31642	0	0.31969	1.3486
													0.1915	12.6574	17.1881	17.2091	14.4711	9.07824	20.9898	9.77416	27.8037	13.9453	46.6106	10.5652	24.9625	0.1915	4.64139	0	3.51215	1.27815	2.5493	1.91343	5.05825	0	0.640139	0.884823
													0.1925	14.3595	18.5686	16.2957	17.8971	10.6581	25.563	12.6186	29.1674	14.1283	47.9038	9.55729	25.9729	0.1925	4.06454	0	4.56205	1.87704	2.21298	1.31508	4.00698	0	1.26641	0.870837
													0.1935	15.9015	20.4586	13.2892	20.9793	11.8716	28.9066	16.4857	28.358	14.1064	46.9189	9.8577	26.8912	0.1935	4.20687	0	5.23776	2.19658	2.02364	0.703912	2.69681	0.000682819	2.10137	1.48693
													0.1945	16.644	23.9977	10.0722	22.0485	12.1767	31.2395	20.3004	26.6177	14.0474	43.3107	10.9404	26.2514	0.1945	4.91026	0	5.24598	2.16121	1.94812	0.293434	1.7603	0.00445254	2.939	2.62571
[truncated: 9 more columns]

## Sheet: supplements
Figure 4 - figure supplement 1A			Figure 4 - figure supplement 1B			Figure 4 - figure supplement 1C			Figure 4 - figure supplement 1D				Figure 4 - figure supplement 1E				Figure 4 - figure supplement 1F			Figure 4 - figure supplement 1G			Figure 4 - figure supplement 1H				Figure 4 - figure supplement 2B				Figure 4 - figure supplement 2C				Figure 4 - figure supplement 2D
													Modulation (%)				Modulation (%)			Modulation (%)			Modulation (%)				MI				MI				Latency (msec)
time(sec)	stationary(Hz)	walking(Hz)	time(sec)	stationary(Hz)	walking(Hz)	time(sec)	stationary(Hz)	walking(Hz)	time(sec)	stationary(Hz)	walking(Hz)		Increased	Decreased	No change		Spontaneous	Evoked		Spontaneous	Evoked		Spontaneous	Evoked			Onset	Sustained	Suppressed		Onset	Sustained	Suppressed		Onset	Sustained	Suppressed
-0.0995	0	4.94484	-0.0995	2.52057	53.0813	-0.0995	6.89784	0.793999	-0.0995	25.4317	37.8862		-6.0049	-88.3534	-58.9905		1200.06	-6.00489		-49.2733	-88.3534		1.12466	-58.9905			0.857149	-58.9905	0.162513		-0.326905	-0.0677249	-0.258816		-65	61	-120
-0.0985	0.000998751	4.62412	-0.0985	1.34917	53.1618	-0.0985	8.29999	0.257774	-0.0985	23.9366	34.403		-53.8151	14.4157	-84.6031		20.5849	-53.8151		-12.6858	14.4157		-8.19084	-84.6031			0.505135	-84.6031	0.199048		-0.561182	-0.0237927	-0.841443		81	147	3
-0.0975	0.00651267	4.15027	-0.0975	0.562416	54.4142	-0.0975	9.59909	0.0651754	-0.0975	20.8359	28.5647		-8.1986	-108.856	1.7942		426.202	-8.19862		-71.8919	-108.857		2.16357	1.79417			0.171537	1.79417	0.741976		-0.272388	-0.212617	-0.405415		-134	-111	-296
-0.0965	0.0330741	3.60464	-0.0965	0.183984	56.6766	-0.0965	10.6663	0.0128338	-0.0965	16.3772	20.7439		57.7072	-8.3929	-7.7937		93.0054	57.7072		-4.64795	-8.39289		4.80394	-7.79367			0.364652	-7.79367	0.0880088		-0.199057	-0.109092	-0.065418		-51	-23	-66
-0.0955	0.130811	3.44441	-0.0955	0.0552565	59.6539	-0.0955	11.3972	0.00196813	-0.0955	12.0743	12.7467		-77.6995	-47.9929	-77.776		9.42949	-77.6995		-42.8153	-47.9929		-17.8342	-77.776			0.835727	-77.776	0.160215				-0.256192		-187	-221	127
-0.0945	0.402925	4.20799	-0.0945	0.0552565	63.3823	-0.0945	11.4068	0	-0.0945	10.1361	6.88383		-12.5197	-65.4325	-30.6349		126.756	-12.5197		-35.0674	-65.4325		-100	-30.6349			0.221172	-30.6349	0.21014				-0.0284852			-115	-53
-0.0935	0.966566	5.941	-0.0935	0.183984	66.7987	-0.0935	10.4771	0.00196813	-0.0935	11.4169	4.52645		22.1686	13.7091	-121.478		9.17066	22.1686		-33.2023	13.7091		23.0438	-121.478			0.803318	-121.478	0.318517				-0.0672367			-158	-102
-0.0925	1.80578	7.95166	-0.0925	0.562416	67.2943	-0.0925	9.05211	0.0128338	-0.0925	14.2205	5.74609		-5.3876		-73.4898		1090.15	-5.3876					-70.6762	-73.4898			0.184415	-73.4898	0.310831				-0.151541			-95	-159
-0.0915	2.6274	9.26475	-0.0915	1.34917	63.2245	-0.0915	7.92571	0.0651754	-0.0915	15.5198	9.49397		-25.8558		-22.4096		225.269	-25.8558					7.60063	-22.4096			0.0681146	-22.4096					-0.161029			-299
-0.0905	2.97723	9.35452	-0.0905	2.52057	56.2164	-0.0905	7.3548	0.257774	-0.0905	13.6083	13.5774		-74.8971		-48.0317		614.779	-74.8971					5.24536	-48.0317			0.0484041	-48.0317								-300
-0.0895	2.6274	8.43758	-0.0895	3.66741	49.7188	-0.0895	6.79125	0.793999	-0.0895	9.48491	15.3494		-33.0258		-72.6282		39.6681	-33.0258					-20.1039	-72.6282			0.682445	-72.6282								-121
-0.0885	1.80578	7.15215	-0.0885	4.15572	45.4474	-0.0885	5.7059	1.9047	-0.0885	5.67249	13.5412		-42.6084		-99.5996		114.788	-42.6084					47.8589	-99.5996			0.387648	-99.5996								-22
-0.0875	0.966566	6.06429	-0.0875	3.66741	42.2996	-0.0875	4.4196	3.55846	-0.0875	4.24103	9.3093		-94.7725		-38.8521		1017.48	-94.7725					-6.34811	-38.8521			0.671735	-38.8521								-18
-0.0865	0.402925	5.40292	-0.0865	2.52057	38.6564	-0.0865	3.82224	5.17752	-0.0865	6.00958	5.00346		-32.7403		-48.2533		56.796	-32.7403					21.9945	-48.2533			0.890598	-48.2533
-0.0855	0.130811	5.08076	-0.0855	1.34917	34.6205	-0.0855	4.35442	5.8669	-0.0855	10.6007	2.19541		-60.397		-17.7287		816.868	-60.397					11.229	-17.7287			0.0927342	-17.7287
-0.0845	0.0330741	4.87669	-0.0845	0.562416	31.7908	-0.0845	5.4353	5.17752	-0.0845	16.4078	1.18172		-6.6969		-2.7454		182.616	-6.69693					66.6667	-2.7454				-2.7454
-0.0835	0.00651267	4.5715	-0.0835	0.18259	31.6172	-0.0835	5.93404	3.55846	-0.0835	21.0746	1.89066		-20.8112		-15.4741		51.61	-20.8112					48.2727	-15.4741				-15.4741
-0.0825	0.000998751	3.97787	-0.0825	0.0461659	34.4059	-0.0825	5.20319	1.9047	-0.0825	22.973	4.65129		-13.057				45.2228	-13.057
-0.0815	0	3.03684	-0.0815	0.0090906	39.5675	-0.0815	3.62954	0.793999	-0.0815	22.3064	9.89573		-14.1932				79.3489	-14.1932
-0.0805	0	1.93959	-0.0805	0.00139409	46.324	-0.0805	2.18815	0.257774	-0.0805	20.5994	17.0886		-3.6975				57.9252	-3.69751
-0.0795	0	1.01267	-0.0795	0	54.0354	-0.0795	1.72032	0.0651754	-0.0795	19.3862	24.3308		-24.2717				149.388	-24.2717
-0.0785	0.000998751	0.475586	-0.0785	0.00139409	61.8617	-0.0785	2.69086	0.0128338	-0.0785	19.2616	29.6039		-26.1053				14.6187	-26.1053
-0.0775	0.00651267	0.39343	-0.0775	0.0090906	68.3395	-0.0775	5.27877	0.00196813	-0.0775	19.5079	32.2399		-39.933				250.636	-39.933
-0.0765	0.0330741	0.839922	-0.0765	0.0461659	71.8329	-0.0765	9.27037	0	-0.0765	18.6447	32.4464		-46.9443				107.918	-46.9443
-0.0755	0.130811	1.94616	-0.0755	0.183984	71.6754	-0.0755	13.8469	0	-0.0755	16.1305	30.077		-39.9873				58.9359	-39.9873
-0.0745	0.402925	3.64564	-0.0745	0.571506	68.5996	-0.0745	17.7079	0	-0.0745	13.5268	25.2382		-11.8141				49.6412	-11.8141
-0.0735	0.966566	5.38561	-0.0735	1.39533	64.0395	-0.0735	19.7099	0	-0.0735	13.2543	19.4917		24.6095				11.764	24.6095
-0.0725	1.80578	6.35739	-0.0725	2.70316	59.5385	-0.0725	19.6017	0	-0.0725	16.0275	14.9403		-123.38				834.21	-123.38
-0.0715	2.6274	6.22236	-0.0715	4.22983	56.8427	-0.0715	18.1431	0	-0.0715	19.8826	12.5524		-74.0706				10.1732	-74.0706
-0.0705	2.97723	5.42386	-0.0705	5.50489	57.5363	-0.0705	16.3921	0	-0.0705	21.8564	12.4422		-14.2472				81.8313	-14.2472
-0.0695	2.6274	4.59361	-0.0695	6.18798	61.5654	-0.0695	14.8967	0	-0.0695	20.7633	14.8978		3.5952				429.811	3.59519
-0.0685	1.80578	3.91389	-0.0685	6.18938	66.142	-0.0685	13.595	0	-0.0685	18.477	19.742		-19.6246				126.61	-19.6246
-0.0675	0.966566	3.29294	-0.0675	5.51398	67.2467	-0.0675	12.3235	0	-0.0675	18.5267	25.0949		-15.9904				409.264	-15.9904
-0.0665	0.402925	2.84501	-0.0665	4.27739	63.0476	-0.0665	11.1947	0	-0.0665	23.0995	28.1965		-35.1218				1628.12	-35.1218
-0.0655	0.130811	2.81845	-0.0655	2.89624	55.705	-0.0655	10.4583	0	-0.0655	30.9017	27.8137		-23.1676				20.4426	-23.1676
-0.0645	0.0330741	3.16313	-0.0645	2.013	49.6002	-0.0645	10.2047	0	-0.0645	37.6844	25.2414		-11.3702				120.164	-11.3702
-0.0635	0.00651267	3.51097	-0.0635	2.15082	48.0276	-0.0635	10.3911	0.00196813	-0.0635	39.2008	23.0518		-135.337				190.513	-135.337
-0.0625	0.000998751	3.62804	-0.0625	3.45865	51.4542	-0.0625	10.9113	0.0128338	-0.0625	34.2627	23.4396		-68.9957				182.878	-68.9957
-0.0615	0	3.62459	-0.0615	5.67132	58.0089	-0.0615	11.3972	0.0651754	-0.0615	25.2491	27.2478		-2.2606				928.224	-2.26062
-0.0605	0	3.62904	-0.0605	8.21714	64.7721	-0.0605	11.1619	0.257774	-0.0605	15.958	33.343		-49.1311				71.0265	-49.1311
-0.0595	0	3.51748	-0.0595	10.4206	68.8485	-0.0595	9.6851	0.795967	-0.0595	9.24826	39.0078		-16.3137				33.5222	-16.3137
-0.0585	0.000998751	3.19521	-0.0585	11.702	68.3811	-0.0585	7.1474	1.91754	-0.0585	6.19682	41.951
-0.0575	0.00651267	2.94275	-0.0575	11.739	63.4583	-0.0575	4.36726	3.6256	-0.0575	6.38903	41.7893
-0.0565	0.0330741	3.21486	-0.0565	10.6004	56.0958	-0.0565	2.17728	5.44813	-0.0565	8.53601	39.0862
-0.0555	0.130811	4.1287	-0.0555	8.77047	49.2374	-0.0555	0.926318	6.72608	-0.0555	11.2967	34.0455
-0.0545	0.402925	5.31675	-0.0545	6.97432	45.7118	-0.0545	0.541215	7.34	-0.0545	13.9483	27.2622
-0.0535	0.966566	6.25644	-0.0535	5.79524	47.5095	-0.0535	0.926318	7.91288	-0.0535	16.1651	20.8644
-0.0525	1.80578	6.60834	-0.0525	5.24673	54.6556	-0.0525	2.17531	8.99976	-0.0525	17.2706	17.5388
-0.0515	2.6274	6.28851	-0.0515	4.77479	64.292	-0.0515	4.36033	10.2845	-0.0515	16.5219	18.1451
-0.0505	2.97723	5.44856	-0.0505	3.86958	71.8391	-0.0505	7.12073	10.8706	-0.0505	14.2686	20.6639
-0.0495	2.6274	4.53714	-0.0495	2.61569	74.0864	-0.0495	9.62088	10.2845	-0.0495	11.9731	21.7738
-0.0485	1.80578	4.20799	-0.0485	1.54994	71.158	-0.0485	11.1284	8.99976	-0.0485	10.6871	19.6423
-0.0475	0.966566	4.84627	-0.0475	1.17239	65.4789	-0.0475	11.8093	7.91288	-0.0475	10.2666	15.3947
-0.0465	0.402925	6.09472	-0.0465	1.71574	59.3798	-0.0465	12.8092	7.34	-0.0465	10.4082	12.0512
-0.0455	0.130811	7.05836	-0.0455	3.13824	54.1244	-0.0455	15.093	6.73001	-0.0455	11.741	12.0512
-0.0445	0.0330741	7.09466	-0.0445	5.07183	50.7401	-0.0445	17.9528	5.4738	-0.0445	15.2787	15.3921
-0.0435	0.00651267	6.24548	-0.0435	6.86028	50.4893	-0.0435	19.2539	3.75792	-0.0435	21.1682	19.623
-0.0425	0.000998751	4.91136	-0.0425	7.89724	53.8421	-0.0425	17.7098	2.44592	-0.0425	28.2917	21.6743
-0.0415	0	3.43325	-0.0415	8.02546	59.5193	-0.0415	14.3138	2.45111	-0.0415	34.7171	20.2557
-0.0405	0	2.0674	-0.0405	7.53715	64.9199	-0.0405	10.9696	4.33779	-0.0405	38.4398	16.833
-0.0395	0	1.03271	-0.0395	6.75179	67.278	-0.0395	8.50864	8.04126	-0.0395	38.3622	14.2306
-0.0385	0.000998751	0.41595	-0.0385	5.69657	64.8205	-0.0385	6.74484	12.5304	-0.0385	35.0224	14.2679
-0.0375	0.00651267	0.132808	-0.0375	4.32216	58.0429	-0.0375	5.65869	16.0902	-0.0375	30.0002	16.7017
-0.0365	0.0330741	0.0330741	-0.0365	2.89484	50.1288	-0.0365	5.50166	17.4501	-0.0365	24.5458	20.0284
-0.0355	0.130811	0.00651267	-0.0355	1.95914	45.1945	-0.0355	5.97939	16.6074	-0.0355	19.3225	22.8317
-0.0345	0.403923	0.000998751	-0.0345	1.92067	45.3852	-0.0345	6.13751	14.4222	-0.0345	15.0217	24.5193
-0.0335	0.973079	0	-0.0335	2.70456	49.8678	-0.0335	5.30787	11.8074	-0.0335	12.1008	25.2668
-0.0325	1.83886	0	-0.0325	3.71497	56.6308	-0.0325	3.82906	9.50248	-0.0325	10.1529	25.4698
-0.0315	2.75821	0	-0.0315	4.1753	64.4331	-0.0315	2.70264	8.04126	-0.0315	8.57604	25.2889
-0.0305	3.38016	0	-0.0305	3.72406	72.4861	-0.0305	2.71154	7.36567	-0.0305	7.65168	24.594
-0.0295	3.59397	0	-0.0295	2.74933	78.9606	-0.0295	3.8814	6.73001	-0.0295	8.21858	23.1353
-0.0285	3.61157	0	-0.0285	2.09417	81.0736	-0.0285	5.50244	5.4501	-0.0285	10.3242	20.9016
-0.0275	3.59397	0	-0.0275	2.474	77.3171	-0.0275	6.68657	3.63843	-0.0275	12.7646	18.513
-0.0265	3.38016	0	-0.0265	4.05233	69.3842	-0.0265	7.14937	1.98271	-0.0265	14.0539	16.8472
-0.0255	2.75821	0	-0.0255	6.23415	61.3365	-0.0255	7.37468	1.05374	-0.0255	13.7564	16.0469
-0.0245	1.83886	0	-0.0245	7.83222	56.4634	-0.0245	7.87819	1.05177	-0.0245	12.997	15.3066
-0.0235	0.973079	0.000998751	-0.0235	7.82453	54.9883	-0.0235	8.58041	1.96988	-0.0235	13.683	13.9617
-0.0225	0.403923	0.00651267	-0.0225	6.18798	54.9691	-0.0225	9.07176	3.57326	-0.0225	17.0194	12.5451
-0.0215	0.130811	0.0330741	-0.0215	3.86974	55.1197	-0.0215	9.1241	5.19232	-0.0215	22.7122	12.5288
-0.0205	0.0330741	0.130811	-0.0205	1.91158	55.9596	-0.0205	8.83621	5.93208	-0.0205	29.4387	14.939
-0.0195	0.00651267	0.402925	-0.0195	0.745005	58.0471	-0.0195	8.67219	5.4353	-0.0195	35.4833	19.2478
-0.0185	0.000998751	0.967565	-0.0185	0.228756	60.2625	-0.0185	9.27939	4.35245	-0.0185	38.8742	23.6175
-0.0175	0	1.8123	-0.0175	0.0552565	60.9677	-0.0175	10.7059	3.80941	-0.0175	38.1113	26.3233
-0.0165	0	2.66047	-0.0165	0.0104847	60.3549	-0.0165	11.8532	4.35245	-0.0165	33.5066	27.2292
-0.0155	0	3.10804	-0.0155	0.00139409	60.3992	-0.0155	11.317	5.43726	-0.0155	27.1574	28.1019
-0.0145	0	3.03032	-0.0145	0	62.4759	-0.0145	8.86633	5.94688	-0.0145	21.2257	31.3308
-0.0135	0	2.77235	-0.0135	0	65.8465	-0.0135	5.73377	5.27033	-0.0135	16.8959	37.9625
-0.0125	0	2.77235	-0.0125	0	68.5804	-0.0125	3.49467	3.89621	-0.0125	15.035	46.509
-0.0115	0	3.03032	-0.0115	0	69.2581	-0.0115	2.95648	3.02165	-0.0115	16.6928	53.4035
-0.0105	0	3.10804	-0.0105	0	67.5718	-0.0105	3.8814	3.75048	-0.0105	21.9784	54.9344
-0.0095	0	2.66047	-0.0095	0	64.1198	-0.0095	5.25553	6.51887	-0.0095	28.8977	49.6399
-0.0085	0	1.8123	-0.0085	0	60.232	-0.0085	5.8817	10.7315	-0.0085	34.5829	39.4917
-0.0075	0	0.967565	-0.0075	0	57.4689	-0.0075	5.17949	14.7461	-0.0075	38.0909	28.6696
-0.0065	0	0.402925	-0.0065	0	56.5968	-0.0065	3.56042	16.7395	-0.0065	41.0359	20.8042
-0.0055	0	0.130811	-0.0055	0	57.0742	-0.0055	1.91754	16.1909	-0.0055	44.8101	17.3067
-0.0045	0	0.0330741	-0.0045	0.00139409	57.6151	-0.0045	0.859174	14.4521	-0.0045	48.0417	17.913
-0.0035	0	0.00651267	-0.0035	0.0090906	57.2112	-0.0035	0.515547	13.3869	-0.0035	47.7988	21.6245
-0.0025	0	0.0019975	-0.0025	0.0461659	55.9202	-0.0025	0.859174	13.3787	-0.0025	42.7991	26.4662
-0.0015	0	0.00651267	-0.0015	0.18259	54.7912	-0.0015	1.91754	13.1214	-0.0015	34.5608	29.469
-0.0005	0	0.0330741	-0.0005	0.562416	54.7854	-0.0005	3.56042	11.55	-0.0005	25.7021	28.5026
0.0005	0.000998751	0.132808	0.0005	1.35335	55.933	0.0005	5.17752	9.35937	0.0005	18.0461	24.4145
0.0015	0.0184977	0.420944	0.0015	2.55063	57.8395	0.0015	5.86887	8.17666	0.0015	12.5376	20.5261
0.0025	0.112225	1.06528	0.0025	3.83246	60.4801	0.0025	5.19036	8.67416	0.0025	10.3132	19.7489
0.0035	0.534212	2.23277	0.0035	4.86988	63.903	0.0035	3.6256	9.95374	0.0035	13.5961	23.02
0.0045	2.00572	4.0873	0.0045	6.13107	67.5215	0.0045	2.18122	10.5525	0.0045	26.1956	31.101
0.0055	5.93247	6.92499	0.0055	9.49973	70.3594	0.0055	1.69364	9.72557	0.0055	53.4081	46.9699
0.0065	13.8075	11.0718	0.0065	17.9009	72.1769	0.0065	2.63648	7.98281	0.0065	99.1474	74.305
0.0075	25.2634	16.0895	0.0075	34.1521	74.3356	0.0075	5.30943	6.72819	0.0075	159.873	111.88
0.0085	36.3118	20.058	0.0085	59.457	79.2565	0.0085	10.0103	7.46594	0.0085	221.182	149.614
0.0095	40.9816	20.5439	0.0095	91.6372	88.2889	0.0095	17.0524	11.3101	0.0095	263.732	172.493
0.0105	36.3118	16.8794	0.0105	123.8	99.6547	0.0105	26.4933	19.2402	0.0105	274.513	170.72
0.0115	25.2634	10.9951	0.0115	145.598	108.73	0.0115	37.5108	32.1374	0.0115	252.393	146.511
0.0125	13.8075	5.64519	0.0125	148.016	110.678	0.0125	48.1696	49.322	0.0125	205.465	111.02
0.0135	5.93247	2.27724	0.0135	128.908	103.371	0.0135	56.5983	66.6271	0.0135	146.667	75.7383
0.0145	2.00572	0.720201	0.0145	95.0246	88.6157	0.0145	62.979	77.3453	0.0145	90.1994	46.9913
0.0155	0.534212	0.178396	0.0155	58.4576	70.8419	0.0155	70.3516	76.9448	0.0155	46.874	26.3012
0.0165	0.112225	0.0345609	0.0165	29.5972	54.2694	0.0165	82.6735	67.2802	0.0165	20.2287	12.9655
0.0175	0.0184977	0.00499375	0.0175	12.1888	40.9625	0.0175	101.521	55.6784	0.0175	7.14542	5.52549
0.0185	0.000998751	0	0.0185	4.04755	31.0581	0.0185	124.395	49.7169	0.0185	2.04043	2.24837
0.0195	0	0	0.0195	1.07647	24.0572	0.0195	145.508	52.5075	0.0195	0.46735	1.66073
0.0205	0	0	0.0205	0.226571	19.6518	0.0205	157.604	61.6278	0.0205	0.0825728	2.94922
0.0215	0	0	0.0215	0.0376985	17.7269	0.0215	154.739	71.2516	0.0215	0.0102948	5.7136
0.0225	0	0	0.0225	0.00278818	17.9872	0.0225	135.964	75.5205	0.0225	0	9.26395
0.0235	0	0	0.0235	0	19.7647	0.0235	106.721	71.3637	0.0235	0	12.3255
0.0245	0	0	0.0245	0	22.1887	0.0245	75.5005	59.4862	0.0245	0	13.5412
0.0255	0	0	0.0255	0	24.456	0.0255	48.833	43.3586	0.0255	0	12.3255
0.0265	0	0	0.0265	0	25.9716	0.0265	29.1533	27.2805	0.0265	0.0025737	9.26137
0.0275	0	0	0.0275	0	26.4036	0.0275	15.9715	14.5626	0.0275	0.0167827	5.69424
0.0285	0	0	0.0285	0	25.6183	0.0285	7.83826	6.47387	0.0285	0.0852294	2.84464
0.0295	0	0	0.0295	0	23.6414	0.0295	3.33164	2.35631	0.0295	0.337089	1.20876
0.0305	0	0	0.0305	0	20.869	0.0305	1.18505	0.692272	0.0305	1.03831	0.69096
0.0315	0	0	0.0315	0	18.1589	0.0315	0.345623	0.161923	0.0315	2.49077	1.12611
0.0325	0	0	0.0325	0	16.3729	0.0325	0.0799773	0.0296038	0.0325	4.65336	2.50755
0.0335	0	0	0.0335	0	15.8133	0.0335	0.0148019	0.00393625	0.0335	6.77061	4.65594
0.0345	0	0	0.0345	0	16.083	0.0345	0.00196813	0	0.0345	7.6721	6.77061
0.0355	0	0	0.0355	0	16.3018	0.0355	0	0	0.0355	6.77061	7.6721
0.0365	0	0	0.0365	0	15.6796	0.0365	0	0	0.0365	4.65336	6.77318
0.0375	0	0	0.0375	0	14.3052	0.0375	0	0	0.0375	2.49077	4.67272
0.0385	0	0	0.0385	0	13.1807	0.0385	0	0	0.0385	1.04088	2.59278
0.0395	0	0	0.0395	0	13.1424	0.0395	0	0	0.0395	0.353871	1.46062
0.0405	0	0	0.0405	0	13.968	0.0405	0	0	0.0405	0.170459	1.71248
0.0415	0	0	0.0415	0	14.8244	0.0415	0	0	0.0415	0.353871	3.6143
0.0425	0	0	0.0425	0	15.4976	0.0425	0	0	0.0425	1.04088	7.16091
0.0435	0	0	0.0435	0	16.9635	0.0435	0	0	0.0435	2.49077	11.4265
0.0445	0	0	0.0445	0	20.6666	0.0445	0	0	0.0445	4.65336	14.4453
0.0455	0	0	0.0455	0	27.119	0.0455	0	0	0.0455	6.77575	14.4595
0.0465	0	0	0.0465	0.00139409	34.9901	0.0465	0	0	0.0465	7.70567	11.5092
0.0475	0	0	0.0475	0.0090906	41.4252	0.0475	0	0	0.0475	6.94106	7.48122
0.0485	0	0	0.0485	0.0461659	43.5424	0.0485	0	0	0.0485	5.32754	4.56995
0.0495	0	0	0.0495	0.18259	40.2461	0.0495	0	0	0.0495	4.56738	3.88294
0.0505	0	0	0.0505	0.562416	33.0209	0.0505	0	0	0.0505	6.02241	5.16091
0.0515	0	0	0.0515	1.34917	24.9535	0.0515	0	0	0.0515	9.6606	7.21485
0.0525	0	0	0.0525	2.52057	18.7561	0.0525	0	0	0.0525	13.7117	8.76333
0.0535	0	0	0.0535	3.66741	15.4498	0.0535	0	0	0.0535	15.6981	9.43441
0.0545	0	0	0.0545	4.15572	14.5238	0.0545	0	0	0.0545	14.5847	9.98605
0.0555	0	0	0.0555	3.66741	14.9459	0.0555	0	0	0.0555	11.8143	11.3716
0.0565	0	0	0.0565	2.52057	15.8234	0.0565	0	0	0.0565	9.72013	13.8624
0.0575	0	0	0.0575	1.34917	16.4131	0.0575	0	0	0.0575	9.18431	17.0886
0.0585	0	0	0.0585	0.562416	16.2819	0.0585	0	0	0.0585	9.38459	20.3564
0.0595	0	0	0.0595	0.18259	15.8895	0.0595	0	0	0.0595	9.43441	22.8333
0.0605	0	0	0.0605	0.0461659	16.4924	0.0605	0	0	0.0605	9.35708	23.8888
0.0615	0	0	0.0615	0.0090906	18.9026	0.0615	0	0	0.0615	9.35175	23.185
0.0625	0	0	0.0625	0.00139409	22.544	0.0625	0	0	0.0625	9.0475	20.411
0.0635	0	0	0.0635	0	25.9618	0.0635	0	0	0.0635	8.146	15.6372
0.0645	0	0	0.0645	0	28.0674	0.0645	0	0	0.0645	7.22936	10.0003
0.0655	0	0	0.0655	0	28.7769	0.0655	0	0	0.0655	7.16091	5.23722
0.0665	0	0	0.0665	0	28.7041	0.0665	0	0	0.0665	7.81149	2.44727
0.0675	0	0	0.0675	0	28.3971	0.0675	0	0	0.0675	8.00919	1.71763
0.0685	0	0	0.0685	0	27.8286	0.0685	0	0	0.0685	6.85584	2.66123
0.0695	0	0	0.0695	0	26.6479	0.0695	0	0	0.0695	4.67015	4.68693
0.0705	0	0	0.0705	0	24.8864	0.0705	0	0	0.0705	2.49334	6.77575
0.0715	0	0	0.0715	0	23.1972	0.0715	0	0	0.0715	1.03831	7.6721
0.0725	0	0	0.0725	0	22.3814	0.0725	0	0	0.0725	0.337089	6.77061
0.0735	0	0	0.0735	0	23.0104	0.0735	0	0	0.0735	0.0878031	4.65336
0.0745	0	0	0.0745	0	25.4872	0.0745	0	0	0.0745	0.0335653	2.49334
0.0755	0	0	0.0755	0	29.7848	0.0755	0	0	0.0755	0.0903768	1.05509
0.0765	0	0	0.0765	0	34.844	0.0765	0	0	0.0765	0.353871	0.422318
0.0775	0	0	0.0775	0	38.9088	0.0775	0	0	0.0775	1.12354	0.424892
0.0785	0	0	0.0785	0	40.8088	0.0785	0	0	0.0785	2.83043	1.07187
0.0795	0	0	0.0795	0	40.4631	0.0795	0	0	0.0795	5.70845	2.57857
0.0805	0	0	0.0805	0	38.129	0.0805	0	0	0.0805	9.34918	4.99045
0.0815	0	0	0.0815	0	33.9957	0.0815	0	0	0.0815	12.6793	7.80891
0.0825	0	0	0.0825	0	28.742	0.0825	0	0	0.0825	14.6673	10.1629
0.0835	0	0	0.0835	0	23.6975	0.0835	0	0	0.0835	15.1701	11.424
0.0845	0	0	0.0845	0	19.955	0.0845	0	0	0.0845	15.0383	11.424
0.0855	0	0	0.0855	0	17.7062	0.0855	0	0	0.0855	15.2901	10.1629
0.0865	0	0	0.0865	0	16.6755	0.0865	0	0	0.0865	16.1916	7.80891
0.0875	0	0	0.0875	0	16.7913	0.0875	0	0	0.0875	17.1555	4.99045
0.0885	0	0	0.0885	0	17.9992	0.0885	0	0	0.0885	17.3327	2.576
0.0895	0	0	0.0895	0	19.5766	0.0895	0	0	0.0895	16.1224	1.05509
0.0905	0	0	0.0905	0	20.0633	0.0905	0	0	0.0905	13.3973	0.342236
0.0915	0	0	0.0915	0	18.1763	0.0915	0	0	0.0915	9.68626	0.104586
0.0925	0	0	0.0925	0	13.9685	0.0925	0	0	0.0925	6.11399	0.118795
0.0935	0	0	0.0935	0	9.03	0.0935	0	0	0.0935	3.88294	0.424892
0.0945	0	0	0.0945	0	5.45078	0.0945	0	0	0.0945	3.61945	1.37539
0.0955	0	0	0.0955	0	4.6691	0.0955	0	0	0.0955	5.02402	3.52907
0.0965	0	0	0.0965	0	7.11046	0.0965	0	0	0.0965	6.94621	7.14413
0.0975	0	0	0.0975	0	12.2029	0.0975	0	0	0.0975	8.04533	11.4265
0.0985	0	0	0.0985	0	18.2761	0.0985	0	0	0.0985	7.9135	14.4646
0.0995	0	0	0.0995	0	22.987	0.0995	0	0	0.0995	7.56645	14.5615
0.1005	0	0	0.1005	0	24.6613	0.1005	0	0	0.1005	8.51953	11.9341
0.1015	0	0	0.1015	0	23.4774	0.1015	0	0	0.1015	11.3431	8.87597
0.1025	0	0	0.1025	0	21.1985	0.1025	0	0	0.1025	15.1895	8.20361
0.1035	0	0	0.1035	0	19.9914	0.1035	0	0	0.1035	18.4722	11.4662
0.1045	0	0	0.1045	0	21.5016	0.1045	0	0	0.1045	19.9058	18.0455
0.1055	0	0	0.1055	0	26.2168	0.1055	0	0	0.1055	19.5202	25.5237
0.1065	0	0	0.1065	0.00139409	32.9844	0.1065	0	0	0.1065	19.1614	31.3885
0.1075	0	0	0.1075	0.0104847	39.5944	0.1075	0	0	0.1075	21.3966	34.7783
0.1085	0	0	0.1085	0.0552565	44.3668	0.1085	0	0	0.1085	27.0138	36.2573
0.1095	0	0	0.1095	0.228756	47.1108	0.1095	0	0	0.1095	33.7655	36.2702
0.1105	0	0	0.1105	0.745005	48.8683	0.1105	0	0	0.1105	38.3861	34.9396
0.1115	0	0	0.1115	1.91158	51.2335	0.1115	0	0	0.1115	40.1301	33.253
0.1125	0	0	0.1125	3.86974	55.369	0.1125	0	0	0.1125	41.7089	32.9405
0.1135	0	0	0.1135	6.18798	60.6624	0.1135	0	0	0.1135	46.0693	34.6777
0.1145	0	0	0.1145	7.82313	64.3574	0.1145	0	0	0.1145	52.5286	37.1697
0.1155	0	0	0.1155	7.82313	63.5088	0.1155	0	0	0.1155	57.1213	38.3143
0.1165	0	0	0.1165	6.18798	58.028	0.1165	0	0	0.1165	56.9735	37.0408
0.1175	0	0	0.1175	3.86974	51.3196	0.1175	0	0	0.1175	53.4188	34.1466
0.1185	0	0	0.1185	1.91158	47.1561	0.1185	0	0	0.1185	50.4011	31.4219
0.1195	0	0	0.1195	0.745005	46.2555	0.1195	0	0	0.1195	50.4028	29.8627
0.1205	0	0	0.1205	0.228756	46.382	0.1205	0	0	0.1205	52.4348	28.9792
0.1215	0	0	0.1215	0.0552565	45.1944	0.1215	0	0	0.1215	53.7901	27.7938
0.1225	0	0	0.1225	0.0104847	42.3599	0.1225	0	0	0.1225	52.8329	25.8114
0.1235	0	0	0.1235	0.00139409	39.5312	0.1235	0	0	0.1235	49.6194	22.8201
0.1245	0	0	0.1245	0	38.8588	0.1245	0	0	0.1245	44.8363	18.6821
0.1255	0	0	0.1255	0	41.0024	0.1255	0	0	0.1255	39.381	14.0107
0.1265	0	0	0.1265	0	44.3108	0.1265	0	0	0.1265	34.3851	10.4137
0.1275	0	0	0.1275	0	46.6642	0.1275	0	0	0.1275	30.3349	9.34211
0.1285	0	0	0.1285	0	48.2514	0.1285	0	0	0.1285	26.3657	10.7439
0.1295	0	0	0.1295	0.00139409	51.515	0.1295	0	0	0.1295	21.4594	13.1068
0.1305	0	0	0.1305	0.0090906	58.0462	0.1305	0	0	0.1305	16.3414	14.7835
0.1315	0	0	0.1315	0.04756	66.368	0.1315	0	0	0.1315	13.6332	15.2579
0.1325	0	0	0.1325	0.19168	73.0516	0.1325	0	0	0.1325	15.9535	15.2953
0.1335	0	0	0.1335	0.608582	75.3755	0.1335	0	0.00196813	0.1335	23.6456	16.0081
0.1345	0	0	0.1345	1.53176	73.0415	0.1345	0	0.0128338	0.1345	33.7896	17.7293
0.1355	0	0	0.1355	3.08299	68.0816	0.1355	0	0.0651754	0.1355	41.4691	19.6578
0.1365	0	0	0.1365	5.01658	63.4121	0.1365	0	0.257774	0.1365	42.9073	20.5076
0.1375	0	0	0.1375	6.67629	61.2274	0.1375	0	0.793999	0.1375	38.0258	19.6141
0.1385	0	0	0.1385	7.33482	62.1756	0.1385	0	1.9047	0.1385	30.03	17.5547
0.1395	0	0	0.1395	6.67629	65.3392	0.1395	0.00196813	3.55846	0.1395	22.7552	15.6298
0.1405	0	0	0.1405	5.01797	68.6424	0.1405	0.0128338	5.17752	0.1405	18.6505	14.8181
0.1415	0	0	0.1415	3.09347	69.6918	0.1415	0.0651754	5.8669	0.1415	18.6505	15.3263
0.1425	0	0	0.1425	1.58841	67.0575	0.1425	0.257774	5.17752	0.1425	22.7552	16.6042
0.1435	0	0	0.1435	0.846428	61.2262	0.1435	0.793999	3.55846	0.1435	30.03	17.463
0.1445	0	0	0.1445	0.982852	54.2501	0.1445	1.9047	1.9047	0.1445	38.0232	16.9119
0.1455	0	0	0.1455	2.14173	48.2741	0.1455	3.55846	0.793999	0.1455	42.8905	15.4851
0.1465	0	0	0.1465	4.44124	44.3177	0.1465	5.17752	0.257774	0.1465	41.3813	15.1665
0.1475	0	0	0.1475	7.53854	42.3091	0.1475	5.8669	0.0651754	0.1475	33.4408	17.554
0.1485	0	0	0.1485	10.3451	42.0482	0.1485	5.17752	0.0128338	0.1485	22.5531	22.5147
0.1495	0	0	0.1495	11.4996	43.8065	0.1495	3.55846	0.00196813	0.1495	13.2767	28.7391
0.1505	0	0	0.1505	10.3899	47.8361	0.1505	1.9047	0	0.1505	8.51109	34.7021
0.1515	0	0	0.1515	7.71974	53.3855	0.1515	0.793999	0	0.1515	8.71493	38.585
0.1525	0	0	0.1525	4.99457	58.6456	0.1525	0.257774	0	0.1525	12.6329	38.2887
0.1535	0	0	0.1535	3.44334	61.9726	0.1535	0.0651754	0	0.1535	18.1411	32.8137
0.1545	0	0	0.1545	3.31174	63.0827	0.1545	0.0128338	0.00196813	0.1545	22.8271	23.6862
0.1555	0	0	0.1555	3.90526	63.1027	0.1555	0.00196813	0.0128338	0.1555	24.6703	14.33
0.1565	0	0	0.1565	4.21237	63.6426	0.1565	0	0.0651754	0.1565	22.8878	7.83691
0.1575	0	0	0.1575	3.6779	65.5949	0.1575	0	0.259742	0.1575	18.3594	5.41459
0.1585	0	0.000998751	0.1585	2.52336	68.2414	0.1585	0	0.806833	0.1585	13.1637	6.48722
0.1595	0	0.00651267	0.1595	1.35965	69.5408	0.1595	0	1.96988	0.1595	9.49579	9.47054
0.1605	0	0.0330741	0.1605	0.617672	67.9539	0.1605	0	3.81623	0.1605	8.61128	12.4468
0.1615	0	0.130811	0.1615	0.411345	64.1652	0.1615	0	5.97349	0.1615	10.4809	13.8886
0.1625	0	0.402925	0.1625	0.791171	60.5644	0.1625	0	7.78641	0.1625	14.41	13.3973
0.1635	0	0.966566	0.1635	1.92067	59.2466	0.1635	0	8.81399	0.1635	19.7665	11.9252
0.1645	0	1.80578	0.1645	3.87113	60.7186	0.1645	0	9.05893	0.1645	25.7132	11.0386
0.1655	0	2.6274	0.1655	6.18798	63.9468	0.1655	0	8.82338	0.1655	30.6977	11.7797
0.1665	0	2.97723	0.1665	7.82313	67.1838	0.1665	0	8.67022	0.1665	33.5319	14.2188
0.1675	0	2.6274	0.1675	7.82313	68.9954	0.1675	0	9.28136	0.1675	35.1899	17.9086
0.1685	0	1.80578	0.1685	6.18798	68.8503	0.1685	0	10.7187	0.1685	38.0173	22.2415
0.1695	0	0.966566	0.1695	3.86974	66.8825	0.1695	0	11.9164	0.1695	42.3513	26.4216
0.1705	0	0.402925	0.1705	1.91158	63.1845	0.1705	0	11.5619	0.1705	45.2107	29.7908
0.1715	0	0.130811	0.1715	0.745005	57.5072	0.1715	0	9.59515	0.1715	43.5297	32.2445
0.1725	0	0.0340728	0.1725	0.228756	49.9213	0.1725	0	7.38267	0.1725	37.6062	34.0651
0.1735	0	0.0130253	0.1735	0.0552565	41.744	0.1735	0	6.27196	0.1735	30.2407	35.5176
0.1745	0	0.0340728	0.1745	0.0104847	35.2432	0.1745	0	6.29447	0.1745	23.7866	36.5608
0.1755	0	0.131809	0.1755	0.00139409	32.0119	0.1755	0	6.44762	0.1755	19.2453	36.4736
0.1765	0	0.411435	0.1765	0.00139409	31.8431	0.1765	0	6.04953	0.1765	17.111	34.0602
0.1775	0	1.01366	0.1775	0.0090906	33.5154	0.1775	0.00196813	5.47796	0.1775	17.8125	28.9294
0.1785	0	2.01025	0.1785	0.0461659	36.2606	0.1785	0.0128338	5.46513	0.1785	21.4312	22.261
0.1795	0	3.33253	0.1795	0.18259	39.8473	0.1795	0.0651754	5.97152	0.1795	27.139	15.8585
0.1805	0	4.92005	0.1805	0.562416	43.3833	0.1805	0.257774	6.12468	0.1805	32.89	11.0892
0.1815	0	6.93512	0.1815	1.34917	45.029	0.1815	0.793999	5.24467	0.1815	36.1857	9.15792
0.1825	0	9.55808	0.1825	2.52057	43.4979	0.1825	1.9047	3.58412	0.1825	35.5156	11.3784
0.1835	0	12.44	0.1835	3.66741	39.5776	0.1835	3.55846	1.97382	0.1835	30.9528	18.0471
0.1845	0	14.6462	0.1845	4.15572	35.718	0.1845	5.17752	1.06461	0.1845	23.7848	27.0225
0.1855	0	15.4077	0.1855	3.66741	34.2125	0.1855	5.8669	1.11695	0.1855	16.0689	34.4395
0.1865	0	14.7774	0.1865	2.52057	35.7937	0.1865	5.17752	2.22765	0.1865	10.1506	37.6382
0.1875	0	13.3711	0.1875	1.34917	39.5146	0.1875	3.55846	4.36726	0.1875	7.85112	36.83
0.1885	0	11.6253	0.1885	0.562416	43.5548	0.1885	1.9047	7.09703	0.1885	9.66499	33.441
0.1895	0	9.55625	0.1895	0.18259	46.3068	0.1895	0.793999	9.4925	0.1895	14.3564	28.1428
0.1905	0	7.2382	0.1905	0.0461659	47.1626	0.1905	0.257774	10.6257	0.1905	19.2007	21.6298
0.1915	0	5.19855	0.1915	0.0090906	46.6299	0.1915	0.0651754	10.2885	0.1915	21.2352	15.9891
0.1925	0	4.0752	0.1925	0.00139409	45.9028	0.1925	0.0128338	9.27037	0.1925	19.1154	13.6598
0.1935	0	4.00757	0.1935	0.00139409	46.0478	0.1935	0.00196813	8.83526	0.1935	14.0025	15.3151
0.1945	0	4.61586	0.1945	0.0090906	47.037	0.1945	0	9.76222	0.1945	8.53888	19.797
0.1955	0	5.4669	0.1955	0.0461659	47.5903	0.1955	0	11.8854	0.1955	5.00648	26.0562
0.1965	0	6.25199	0.1965	0.183984	46.5134	0.1965	0	14.5002	0.1965	4.37371	33.9565
0.1975	0	6.5732	0.1975	0.571506	44.2733	0.1975	0	16.8692	0.1975	6.46786	42.4994
0.1985	0	6.00756	0.1985	1.39533	42.7516	0.1985	0	18.2569	0.1985	10.4068	48.4719
0.1995	0	4.56499	0.1995	2.70316	43.1676	0.1995	0	18.0581	0.1995	14.8524	48.6116
